# Supplementary material
Source: PubMed Central journal article supplement (PMC5838643)
Supplement: cs7b04395_si_001.pdf [file cs7b04395_si_001.pdf]

# Supporting Information

## Broad-Scope Rh-Catalyzed Inverse-Sonogashira Reaction Directed by Weakly Coordinating Groups

Eric Tan,<sup>†,§</sup> Ophélie Quinonero,<sup>†,§</sup> M. Elena de Orbe<sup>†</sup> and Antonio M. Echavarren<sup>†,‡\*</sup>

<sup>†</sup> Institute of Chemical Research of Catalonia (ICIQ), Barcelona Institute of Science and Technology, Av. Països Catalans 16, 43007 Tarragona (Spain).

<sup>‡</sup> Departament de Química Orgànica i Analítica, Universitat Rovira i Virgili, C/ Marcel·lí Domingo s/n, 43007 Tarragona (Spain).

<sup>§</sup> These authors contributed equally.

\*Email: [aechavarren@iciq.es](mailto:aechavarren@iciq.es)

## Table of Contents

|                                                                              |             |
|------------------------------------------------------------------------------|-------------|
| <b>1) General Information</b>                                                | <b>S2</b>   |
| <b>2) Optimization Studies</b>                                               | <b>S3</b>   |
| <b>3) General Procedure for the Rhodium(III)-Catalyzed C–H Alkynylation</b>  | <b>S6</b>   |
| <b>4) Characterization Data of Products</b>                                  | <b>S7</b>   |
| <b>5) Mechanistic Studies</b>                                                | <b>S47</b>  |
| <b>6) <math>^1\text{H}</math> and <math>^{13}\text{C}</math> NMR Spectra</b> | <b>S57</b>  |
| <b>7) DFT Mechanistic Studies</b>                                            | <b>S150</b> |
| <b>8) References</b>                                                         | <b>S218</b> |

## 1) General Information

Catalytic reactions were carried out in 10 mL tubes under an argon atmosphere using pre-dried glassware. (Bromoethynyl)triisopropylsilane was synthesized according to previously described procedures.<sup>1</sup> Other chemicals were obtained from commercial sources and were used without further purification. Yields refer to isolated compounds, estimated to be > 95% pure as determined by <sup>1</sup>H-NMR. Chromatography: silica gel 60 (40-63 μm) from PanReac AppliChem. Analytical thin layer chromatography was carried out using TLC-aluminum sheets with 0.2 mm of silica gel (Merck GF<sub>234</sub>) using UV light. NMR: Spectra were recorded at 298 K on a Bruker Avance 300, Bruker Avance 400 Ultrashield and Bruker Avance 500 Ultrashield apparatuses in the solvent indicated; chemical shifts (δ) are given in ppm (multiplicity, coupling constant (Hertz), number of protons). Mass spectra were recorded on a Waters Micromass LCT Premier (ESI), Waters Micromass GCT (EI, CI) and Bruker Daltonics Autoflex (MALDI) spectrometers. Melting points were determined using a Büchi melting point apparatus.

## 2) Optimization studies

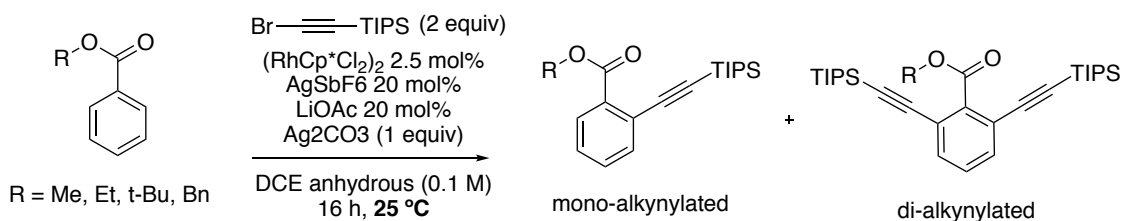

| Entry | R            | Ratio mono/di <sup>(a)</sup> | Yield (mono)       |
|-------|--------------|------------------------------|--------------------|
| 1     | Et           | 30:1                         | 35% <sup>(b)</sup> |
| 2     | Me           | n.d.                         | 11% <sup>(d)</sup> |
| 3     | Bn           | n.d.                         | 6% <sup>(d)</sup>  |
| 4     | <i>t</i> -Bu | 26:1                         | 42% <sup>(c)</sup> |

(a) Ratio mono/di determined on the crude NMR (b) Isolated Yield of monoalkynylated compound (c) NMR Yield determined using mesitylene as internal standard (d) NMR Yield determined using bromomesitylene as internal standard

**Table S2.1 - Variation of the ester chain**

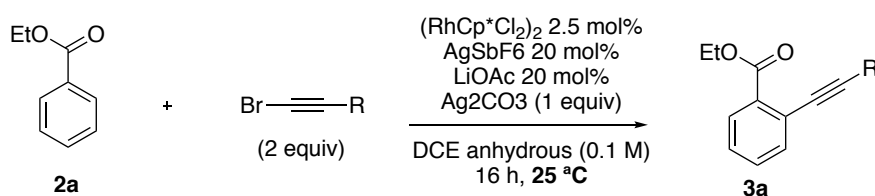

| Entry | R                              | Ratio mono/di <sup>(a)</sup>                                      | Yield (mono)       |
|-------|--------------------------------|-------------------------------------------------------------------|--------------------|
| 1     | TIPS                           | 30:1                                                              | 35% <sup>(b)</sup> |
| 2     | Ph                             | no conversion (degradation of the alkyne)                         |                    |
| 3     | C <sub>6</sub> H <sub>11</sub> | no conversion (either at 45 °C for 3 days, 55 °C, 65 °C or 90 °C) |                    |

(a) Ratio mono/di determined on the crude NMR (b) Isolated Yield

**Table S2.2 - Variation of the alkyne**

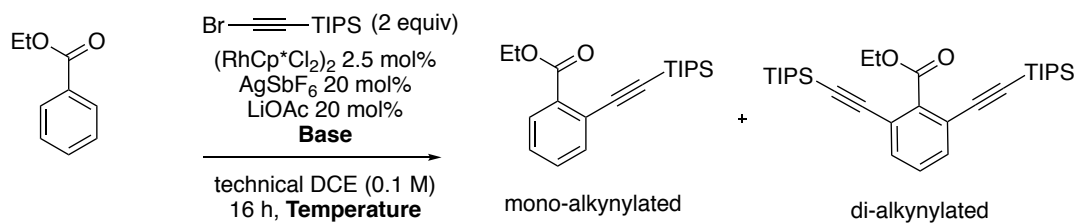

| Entry | Temperature | Base                                            | Ratio mono/di <sup>(a)</sup> | Yield (mono)       |
|-------|-------------|-------------------------------------------------|------------------------------|--------------------|
| 1     | 45 °C       | Ag <sub>2</sub> CO <sub>3</sub> 1 equiv         | 3.2 : 1                      | 58% <sup>(b)</sup> |
| 2     | 55 °C       | Ag <sub>2</sub> CO <sub>3</sub> 1 equiv         | 1.2 : 1                      | 44% <sup>(b)</sup> |
| 3     | 65 °C       | Ag <sub>2</sub> CO <sub>3</sub> 1 equiv         | 1 : 3                        | 16% <sup>(b)</sup> |
| 4     | 75 °C       | Ag <sub>2</sub> CO <sub>3</sub> 1 equiv         | 1 : 2.5                      | 16% <sup>(b)</sup> |
| 5     | 45 °C       | Ag <sub>2</sub> CO <sub>3</sub> 0.5 equiv       | 14 : 1                       | 41% <sup>(b)</sup> |
| 6     | 45 °C       | Ag <sub>2</sub> CO <sub>3</sub> (0.5 equiv) x 2 | 4 : 1                        | 54% <sup>(c)</sup> |
| 7     | 45 °C       | Ag <sub>2</sub> CO <sub>3</sub> 1 equiv         | 4 : 1                        | 69% <sup>(b)</sup> |
| 8     | 45 °C       | K <sub>2</sub> CO <sub>3</sub> 1 equiv          | -                            | 5% <sup>(c)</sup>  |

<sup>(a)</sup> Ratio mono/di determined on the crude NMR <sup>(b)</sup> NMR Yield determined using mesitylene as internal standard <sup>(c)</sup> NMR Yield determined using bromomesitylene as internal standard

**Table S2.3 - Temperature and base stoichiometry screening**

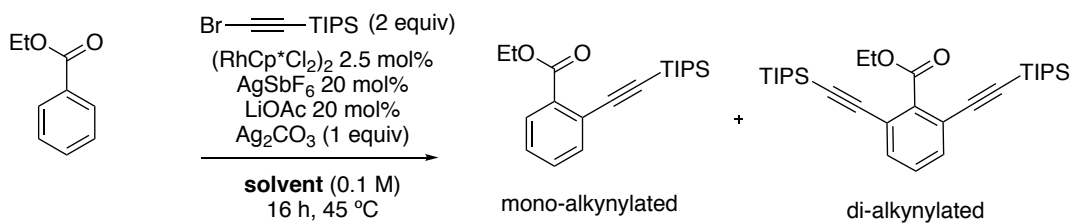

| Entry     | Solvent                           | Ratio mono/di <sup>(a)</sup> | Yield (mono)             |
|-----------|-----------------------------------|------------------------------|--------------------------|
| 1         | Hexafluoroisopropanol             | -                            | no conv.                 |
| 2         | Trifluoroethanol                  | -                            | no conv.                 |
| 3         | Dichloromethane                   | n.d.                         | 8-14% <sup>(b)</sup>     |
| 4         | Toluene                           | -                            | no conv.                 |
| 5         | <i>tert</i> -amyl alcohol         | -                            | no conv.                 |
| 6         | Methanol                          | -                            | no conv.                 |
| 7         | Ethanol                           | -                            | no conv.                 |
| 8         | Chlorobenzene                     | -                            | no conv.                 |
| 9         | Acetonitrile                      | -                            | no conv.                 |
| 10        | Diethylether                      | n.d.                         | 4% <sup>(c)</sup>        |
| 11        | Ethyl acetate                     | n.d.                         | 18% <sup>(c)</sup>       |
| 12        | Dioxane                           | -                            | no conv.                 |
| 13        | Dimethylformamide                 | -                            | no conv.                 |
| <b>14</b> | <b>Dichloroethane (technical)</b> | <b>3.6:1</b>                 | <b>58%<sup>(c)</sup></b> |
| 15        | Dichloroethane (anhydrous)        | 3:1                          | 51% <sup>(c)</sup>       |

<sup>(a)</sup> Ratio mono/di determined on the crude NMR <sup>(b)</sup> NMR Yield determined using mesitylene as internal standard <sup>(c)</sup> NMR Yield determined using bromomesitylene as internal standard

**Table S2.4 - Solvent Screening**

### 3) General Procedures for the Rhodium(III)-Catalyzed C–H Alkynylation

#### 3.1 - General Procedure for Ester (3a-aa, 9a-e) and Ether (5a-w)

(RhCp\*Cl<sub>2</sub>)<sub>2</sub>, AgSbF<sub>6</sub>, LiOAc, Ag<sub>2</sub>CO<sub>3</sub>, were weighted in a 10 mL tube inside a glovebox and dissolved in technical DCE (2 mL). Benzoic esters (0.20 mmol) and 1-bromo-2-(triisopropylsilyl)acetylene **1** were then added with a Hamilton syringe and the reaction mixture was stirred for corresponding time (16-72h) and temperature (45-100 °C) according to the conversion estimated by TLC (100% Toluene). After cooling at ambient temperature, bromomesitylene (1 eq) was added as internal standard through an Hamilton syringe and the crude mixture was filtrated in a pipette through a short plug of silica and washed with DCM. After filtration, the solvents were removed under vacuum. The residue was purified by silica gel chromatography column with Toluene 100% as eluent to yield the corresponding mono alkynylated products and depending on the selectivity of the reaction some dialkynylated products which most of the time came along in the first fractions with some residual 1-bromo-2-(triisopropylsilyl)acetylene. In this case, when dialkynylated compound was present, it was then re-purified from residual 1-bromo-2-(triisopropylsilyl)acetylene with a second silica gel chromatography column using Cyclohexane 100% to Cyclohexane/EtOAc 90:10 as eluent.

#### 3.2 - General Procedure for Ketone (7a-v, 9f-g)

[Cp\*RhCl<sub>2</sub>]<sub>2</sub> (3.72 mg, 6.00 μmol, 3 mol %), Ag<sub>2</sub>CO<sub>3</sub> (55.1 mg, 0.20 mmol, 1 equiv), LiOAc (2.64 mg, 0.04 mmol, 0.2 equiv), AgSbF<sub>6</sub> (13.74 mg, 0.04 mmol, 0.2 equiv) were weighted in a vial inside a glovebox and dichloroethane (1 mL) is added. Corresponding ketone (0.20 mmol) and 1-Bromo-2-(triisopropylsilyl)acetylene **1** (57.5 mg, 0.22 mmol, 1.1 equiv) are then added and the vial is sealed. The reaction mixture is stirred at the appointed temperature for 16 h. After cooling to the appointed temperature, the reaction mixture is filtrated through celite and purified by column chromatography, with a gradient from cyclohexane 100% to 1/1 cyclohexane/ethyl acetate to yield corresponding product.

## 4) Characterization Data of Products

### *Ethyl 2-((triisopropylsilyl)ethynyl)benzoate (3a)*

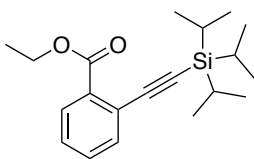

The title compound was prepared by reaction between  $(\text{RhCp}^*\text{Cl}_2)_2$  (3.09 mg, 0.005 mmol, 0.025 equiv),  $\text{AgSbF}_6$  (13.74 mg, 0.04 mmol, 0.20 equiv),  $\text{LiOAc}$  (2.64 mg, 0.04 mmol, 0.20 equiv),  $\text{Ag}_2\text{CO}_3$  (55 mg, 0.2 mmol, 1 equiv), ethyl benzoate (**2a**) (30.0 mg, 28.7  $\mu\text{L}$ , 0.20 mmol), and 1-bromo-2-(triisopropylsilyl)acetylene (**1**) (105 mg, 90  $\mu\text{L}$ , 0.40 mmol, 2 equiv) according to general procedure, at 45 °C for 16 h, and obtained as a colorless oil (37 mg, 0.11 mmol, 56% yield).  $^1\text{H NMR}$  (500 MHz, Chloroform-*d*)  $\delta$  7.85 (dd,  $J = 7.7, 1.5$  Hz, 1H), 7.59 (dd,  $J = 7.6, 1.5$  Hz, 1H), 7.42 (td,  $J = 7.5, 1.6$  Hz, 1H), 7.34 (td,  $J = 7.6, 1.5$  Hz, 1H), 4.39 (q,  $J = 7.1$  Hz, 2H), 1.38 (t,  $J = 7.1$  Hz, 3H), 1.15 (s, 21H).  $^{13}\text{C NMR}$  (126 MHz, Chloroform-*d*)  $\delta$  166.7, 135.1, 133.2, 131.3, 130.0, 128.1, 123.5, 105.3, 96.5, 61.4, 18.8 (6C), 14.5, 11.5 (3C). **HRMS** (ESI+)  $m/z$  calc. for  $\text{C}_{20}\text{H}_{31}\text{O}_2\text{Si}^+$   $[\text{M}+\text{H}]^+$ : 331.2088; found: 331.2080.

### *Ethyl 2,6-bis((triisopropylsilyl)ethynyl)benzoate (3a'')*

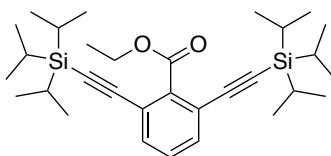

Compound **3a''** was obtained as a white crystalline solid (14 mg, 0.03 mmol, 14% yield).  $^1\text{H NMR}$  (500 MHz, Chloroform-*d*)  $\delta$  7.45 (d,  $J = 7.8$  Hz, 2H), 7.27 (dd,  $J = 7.6, 7.5$  Hz, 1H), 4.36 (q,  $J = 7.2$  Hz, 2H), 1.37 (t,  $J = 7.2$  Hz, 3H), 1.11 (s, 42H).  $^{13}\text{C NMR}$  (126 MHz, Chloroform-*d*)  $\delta$  167.5, 139.8, 132.7 (2C), 128.9, 121.2 (2C), 103.3 (2C), 95.5 (2C), 62.0, 18.8 (12C), 14.2, 11.4 (6C). **HRMS** (ESI+)  $m/z$  calc. for  $\text{C}_{31}\text{H}_{51}\text{O}_2\text{Si}_2^+$   $[\text{M}+\text{H}]^+$ : 511.3422; found: 511.3433. **Mp** 58-60 °C.

### *Methyl 2-((triisopropylsilyl)ethynyl)benzoate (3b)*

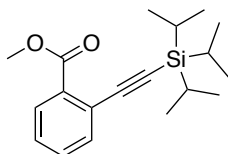

The title compound was prepared by reaction between  $(\text{RhCp}^*\text{Cl}_2)_2$  (3.09 mg, 0.005 mmol, 0.025 equiv),  $\text{AgSbF}_6$  (13.74 mg, 0.04 mmol, 0.20 equiv),  $\text{LiOAc}$  (2.64 mg, 0.04 mmol, 0.20 equiv),



Ag<sub>2</sub>CO<sub>3</sub> (55 mg, 0.2 mmol, 1 equiv), methyl benzoate (**2b**) (27.2 mg, 0.20 mmol), and 1-bromo-2-(triisopropylsilyl)acetylene (**1**) (105 mg, 90 μL, 0.40 mmol, 2 equiv) according to general procedure, at 45 °C for 16 h, and obtained as a colorless oil (29 mg, 0.09 mmol, 45% yield). <sup>1</sup>H NMR (500 MHz, Chloroform-d) δ 7.88 (d, J = 8.0 Hz, 1H), 7.59 (d, J = 7.7 Hz, 1H), 7.46 – 7.40 (td, J = 7.6, 1.3 Hz, 1H), 7.35 (td, J = 7.6, 1.3 Hz, 1H), 3.91 (d, J = 1.0 Hz, 3H), 1.15 (s, 21H). <sup>13</sup>C NMR (126 MHz, Chloroform-d) δ 167.3, 135.1, 132.8, 131.5, 130.3, 128.1, 123.5, 105.3, 96.4, 52.3, 18.8 (6C), 11.5 (3C). Data were in agreement with existing literature.<sup>2</sup>

***Tert-butyl 2-((triisopropylsilyl)ethynyl)benzoate (3c)***

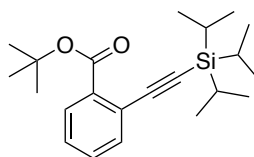

The title compound was prepared by reaction between (RhCp\*Cl<sub>2</sub>)<sub>2</sub> (3.09 mg, 0.005 mmol, 0.025 equiv), AgSbF<sub>6</sub> (13.74 mg, 0.04 mmol, 0.20 equiv), LiOAc (2.64 mg, 0.04 mmol, 0.20 equiv), Ag<sub>2</sub>CO<sub>3</sub> (55 mg, 0.2 mmol, 1 equiv), *tert*-butyl benzoate (**2c**) (35.6 mg, 0.20 mmol), and 1-bromo-2-(triisopropylsilyl)acetylene (**1**) (105 mg, 90 μL, 0.40 mmol, 2 equiv) according to general procedure, at 45 °C for 16 h, and obtained as a colorless oil (29 mg, 0.11 mmol, 53% yield). <sup>1</sup>H NMR (500 MHz, Chloroform-d) δ 7.72 (dd, J = 7.7, 0.9 Hz, 1H), 7.56 (d, J = 7.6 Hz, 1H), 7.38 (td, J = 7.5, 0.9 Hz, 1H), 7.31 (t, J = 7.6 Hz, 1H), 1.60 (s, 9H), 1.15 (s, 21H). <sup>13</sup>C NMR (126 MHz, Chloroform-d) δ 165.9, 135.04, 135.01, 130.7, 129.5, 127.9, 123.1, 105.4, 96.1, 81.7, 28.3 (3C), 18.8 (6C), 11.6 (3C). HRMS (ESI+) *m/z* calc. for C<sub>22</sub>H<sub>34</sub>NaO<sub>2</sub>Si<sup>+</sup> [M+Na]<sup>+</sup>: 381.2220; found: 381.2220.

***Benzyl 2-((triisopropylsilyl)ethynyl)benzoate (3d)***

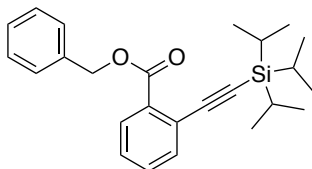

The title compound was prepared by reaction between (RhCp\*Cl<sub>2</sub>)<sub>2</sub> (3.09 mg, 0.005 mmol, 0.025 equiv), AgSbF<sub>6</sub> (13.74 mg, 0.04 mmol, 0.20 equiv), LiOAc (2.64 mg, 0.04 mmol, 0.20 equiv), Ag<sub>2</sub>CO<sub>3</sub> (55 mg, 0.2 mmol, 1 equiv), benzyl benzoate (**2d**) (42.4 mg, 0.20 mmol), and 1-bromo-2-(triisopropylsilyl)acetylene (**1**) (105 mg, 90 μL, 0.40 mmol, 2 equiv) according to general procedure, at 45 °C for 16 h, and obtained as a colorless oil (22 mg, 0.06 mmol, 28% yield). <sup>1</sup>H NMR (500 MHz, Chloroform-d) δ 7.89 (dd, J = 7.9, 1.4 Hz, 1H), 7.61 (dd, J = 7.9, 1.3 Hz, 1H),

7.48 – 7.40 (m, 3H), 7.40 – 7.28 (m, 4H), 5.38 (s, 2H), 1.14 (s, 21H).  $^{13}\text{C}$  NMR (126 MHz, Chloroform-*d*)  $\delta$  166.2, 136.3, 135.2, 132.7, 131.5, 130.2, 128.6 (2C), 128.3 (2C), 128.2, 128.0, 123.9, 105.2, 96.9, 66.9, 18.8 (6C), 11.5 (3C). HRMS (ESI+)  $m/z$  calc. for  $\text{C}_{25}\text{H}_{32}\text{NaO}_2\text{Si}^+$   $[\text{M}+\text{Na}]^+$ : 415.2064; found: 415.2059. HRMS (ESI+)  $m/z$  calc. for  $\text{C}_{25}\text{H}_{32}\text{NaO}_2\text{Si}^+$   $[\text{M}+\text{Na}]^+$ : 415.2064; found: 415.2059.

***Ethyl 2-methyl-6-((triisopropylsilyl)ethynyl)benzoate (3e)***

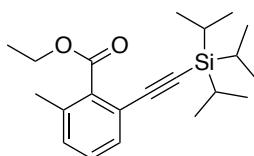

The title compound was prepared by reaction between  $(\text{RhCp}^*\text{Cl}_2)_2$  (3.09 mg, 0.005 mmol, 0.025 equiv),  $\text{AgSbF}_6$  (13.74 mg, 0.04 mmol, 0.20 equiv),  $\text{LiOAc}$  (2.64 mg, 0.04 mmol, 0.20 equiv),  $\text{Ag}_2\text{CO}_3$  (55 mg, 0.2 mmol, 1 equiv), ethyl 2-methylbenzoate (**2e**) (32.8 mg, 31.8  $\mu\text{L}$  0.20 mmol), and 1-bromo-2-(triisopropylsilyl)acetylene (**1**) (105 mg, 90  $\mu\text{L}$ , 0.40 mmol, 2 equiv) according to general procedure, at 60  $^\circ\text{C}$  for 48h, and obtained as a colorless oil (62 mg, 0.18 mmol, 90% yield).  $^1\text{H}$  NMR (500 MHz, Chloroform-*d*)  $\delta$  7.35 (ddd,  $J = 7.7, 1.2, 0.6$  Hz, 1H), 7.22 (t,  $J = 7.7$  Hz, 1H), 7.15 (ddd,  $J = 7.7, 1.3, 0.7$  Hz, 1H), 4.38 (q,  $J = 7.1$  Hz, 2H), 2.32 (s, 3H), 1.38 (t,  $J = 7.2$  Hz, 3H), 1.12 (s, 21H).  $^{13}\text{C}$  NMR (126 MHz, Chloroform-*d*)  $\delta$  168.6, 136.8, 134.8, 130.4, 130.1, 128.9, 120.8, 104.2, 94.2, 61.3, 19.4, 18.6 (6C), 14.2, 11.3 (3C). HRMS (ESI+)  $m/z$  calc. for  $\text{C}_{21}\text{H}_{33}\text{O}_2\text{Si}^+$   $[\text{M}+\text{H}]^+$ : 345.2244; found: 345.2259.

***Ethyl 2-chloro-6-((triisopropylsilyl)ethynyl)benzoate (3f)***

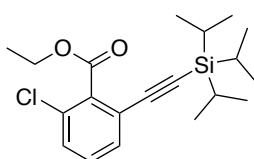

The title compound was prepared by reaction between  $(\text{RhCp}^*\text{Cl}_2)_2$  (3.09 mg, 0.005 mmol, 0.025 equiv),  $\text{AgSbF}_6$  (13.74 mg, 0.04 mmol, 0.20 equiv),  $\text{LiOAc}$  (2.64 mg, 0.04 mmol, 0.20 equiv),  $\text{Ag}_2\text{CO}_3$  (55 mg, 0.2 mmol, 1 equiv), ethyl 2-chlorobenzoate (**2f**) (36.9 mg, 0.20 mmol), and 1-bromo-2-(triisopropylsilyl)acetylene (**1**) (105 mg, 90  $\mu\text{L}$ , 0.40 mmol, 2 equiv) according to general procedure, at 60  $^\circ\text{C}$  for 48 h, and obtained as a colorless oil (50 mg, 0.14 mmol, 69% yield).  $^1\text{H}$  NMR (500 MHz, Chloroform-*d*)  $\delta$  7.41 (dd,  $J = 7.7, 1.1$  Hz, 1H), 7.34 (dd,  $J = 8.2, 1.2$  Hz, 1H), 7.26 (dd,  $J = 8.2, 7.7$  Hz, 1H), 4.41 (q,  $J = 7.1$  Hz, 2H), 1.39 (t,  $J = 7.2$  Hz, 3H), 1.11 (s, 21H).  $^{13}\text{C}$  NMR (126 MHz, Chloroform-*d*)  $\delta$  166.1, 136.8, 131.2, 130.8, 130.0, 129.4, 122.8, 102.7, 96.4, 62.1, 18.7 (6C), 14.2, 11.4 (3C). HRMS (ESI+)  $m/z$  calc. for  $\text{C}_{20}\text{H}_{30}\text{ClO}_2\text{Si}^+$   $[\text{M}+\text{H}]^+$ :

365.1698; found: 365.1701.

***Ethyl 2-methoxy-6-((triisopropylsilyl)ethynyl)benzoate (3g)***

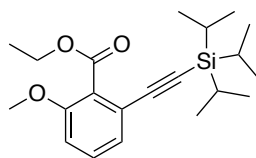

The title compound was prepared by reaction between (RhCp\*Cl<sub>2</sub>)<sub>2</sub> (3.09 mg, 0.005 mmol, 0.025 equiv), AgSbF<sub>6</sub> (13.74 mg, 0.04 mmol, 0.20 equiv), LiOAc (2.64 mg, 0.04 mmol, 0.20 equiv), Ag<sub>2</sub>CO<sub>3</sub> (55 mg, 0.2 mmol, 1 equiv), ethyl 2-methoxybenzoate (**2g**) (36.0 mg, 0.20 mmol), and 1-bromo-2-(triisopropylsilyl)acetylene (**1**) (105 mg, 90 μL, 0.40 mmol, 2 equiv) according to general procedure, at 45 °C for 16 h, and obtained as a colorless oil (62 mg, 0.18 mmol, 90% yield). <sup>1</sup>H NMR (500 MHz, Chloroform-d) δ 7.26 (t, *J* = 8.0 Hz, 1H), 7.10 (d, *J* = 7.7 Hz, 1H), 6.88 (d, *J* = 8.4 Hz, 1H), 4.37 (q, *J* = 7.1 Hz, 2H), 3.81 (s, 3H), 1.36 (t, *J* = 7.1 Hz, 3H), 1.11 (s, 21H). <sup>13</sup>C NMR (126 MHz, Chloroform-d) δ 167.0, 156.1, 130.2, 126.9, 125.2, 122.1, 111.6, 103.6, 94.8, 61.6, 56.2, 18.7 (6C), 14.2, 11.4 (3C). HRMS (ESI+) *m/z* calc. for C<sub>21</sub>H<sub>33</sub>O<sub>3</sub>Si<sup>+</sup> [M+H]<sup>+</sup>: 361.2193; found: 361.2183.

***Ethyl 2-(trifluoromethyl)-6-((triisopropylsilyl)ethynyl)benzoate (3h)***

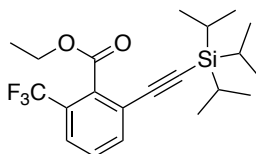

The title compound was prepared by reaction between (RhCp\*Cl<sub>2</sub>)<sub>2</sub> (3.09 mg, 0.005 mmol, 0.025 equiv), AgSbF<sub>6</sub> (13.74 mg, 0.04 mmol, 0.20 equiv), LiOAc (2.64 mg, 0.04 mmol, 0.20 equiv), Ag<sub>2</sub>CO<sub>3</sub> (55 mg, 0.2 mmol, 1 equiv), ethyl 2-(trifluoromethyl)benzoate (**2h**) (43.6 mg, 39.3 μL, 0.20 mmol), and 1-bromo-2-(triisopropylsilyl)acetylene (**1**) (105 mg, 90 μL, 0.40 mmol, 2 equiv) according to general procedure, at 60 °C for 48 h, and obtained as a slightly yellow oil (55 mg, 0.14 mmol, 69% yield). <sup>1</sup>H NMR (500 MHz, Chloroform-*d*) δ 7.69 (ddd, *J* = 7.8, 1.2, 0.6 Hz, 1H), 7.61 (ddd, *J* = 8.0, 1.2, 0.6 Hz, 1H), 7.46 (tq, *J* = 7.9, 0.9 Hz, 1H), 4.40 (q, *J* = 7.2 Hz, 2H), 1.37 (t, *J* = 7.2 Hz, 3H), 1.12 (s, 21H). <sup>13</sup>C NMR (126 MHz, Chloroform-*d*) δ 166.4, 136.3, 135.3 (q, *J* = 2.2 Hz), 129.3, 127.7 (q, *J* = 32.5 Hz), 125.8 (q, *J* = 4.6 Hz), 124.4 (q, *J* = 273 Hz), 122.8, 102.4, 97.2, 62.4, 18.7 (6C), 14.0, 11.4 (3C). <sup>19</sup>F NMR (<sup>19</sup>F{<sup>1</sup>H}, 376 MHz, Chloroform-*d*) δ -60.25. HRMS (ESI+) *m/z* calc. for C<sub>21</sub>H<sub>29</sub>F<sub>3</sub>NaO<sub>2</sub>Si<sup>+</sup> [M+Na]<sup>+</sup>: 421.1781; found: 421.1782.

**Ethyl 5-methyl-2-((triisopropylsilyl)ethynyl)benzoate (3i)**

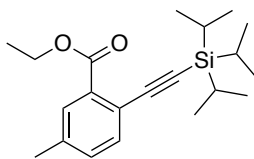

The title compound was prepared by reaction between  $(\text{RhCp}^*\text{Cl}_2)_2$  (3.09 mg, 0.005 mmol, 0.025 equiv),  $\text{AgSbF}_6$  (13.74 mg, 0.04 mmol, 0.20 equiv),  $\text{LiOAc}$  (2.64 mg, 0.04 mmol, 0.20 equiv),  $\text{Ag}_2\text{CO}_3$  (55 mg, 0.2 mmol, 1 equiv), ethyl 3-methylbenzoate (**2i**) (32.8 mg, 31.9  $\mu\text{L}$  0.20 mmol), and 1-bromo-2-(triisopropylsilyl)acetylene (**1**) (105 mg, 90  $\mu\text{L}$ , 0.40 mmol, 2 equiv) according to general procedure, at 45 °C for 16 h, and obtained as a colorless oil (33 mg, 0.10 mmol, 48% yield).  **$^1\text{H NMR}$**  (400 MHz, Chloroform-*d*)  $\delta$  7.65 (dt,  $J = 1.9, 0.8$  Hz, 1H), 7.47 (d,  $J = 7.9$  Hz, 1H), 7.22 (ddd,  $J = 7.9, 1.9, 0.8$  Hz, 1H), 4.38 (q,  $J = 7.1$  Hz, 2H), 2.37 (s, 3H), 1.38 (t,  $J = 7.1$  Hz, 3H), 1.14 (s, 21H).  **$^{13}\text{C NMR}$**  (101 MHz, Chloroform-*d*)  $\delta$  166.7, 138.2, 134.9, 132.9, 131.9, 130.3, 120.4, 105.3, 95.1, 61.1, 21.3, 18.7 (6C), 14.3, 11.4 (3C). **HRMS** (ESI+)  $m/z$  calc. for  $\text{C}_{21}\text{H}_{33}\text{O}_2\text{Si}^+ [\text{M}+\text{H}]^+$ : 345.2244; found: 345.2249.

**Ethyl 3-fluoro-2-((triisopropylsilyl)ethynyl)benzoate (3j')**

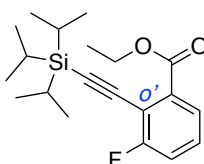

The title compound was prepared by reaction between  $(\text{RhCp}^*\text{Cl}_2)_2$  (3.09 mg, 0.005 mmol, 0.025 equiv),  $\text{AgSbF}_6$  (13.74 mg, 0.04 mmol, 0.20 equiv),  $\text{LiOAc}$  (2.64 mg, 0.04 mmol, 0.20 equiv),  $\text{Ag}_2\text{CO}_3$  (55 mg, 0.2 mmol, 1 equiv), ethyl 3-fluorobenzoate (**2j**) (33.6 mg, 29.6  $\mu\text{L}$  0.20 mmol), and 1-bromo-2-(triisopropylsilyl)acetylene (**1**) (105 mg, 90  $\mu\text{L}$ , 0.40 mmol, 2 equiv) according to general procedure, at 45 °C for 16 h, and obtained as a colorless oil (37 mg, 0.11 mmol, 53% yield).  **$^1\text{H NMR}$**  ( $^1\text{H}\{^{19}\text{F}\}$ , 400 MHz, Chloroform-*d*)  $\delta$  7.64 (dd,  $J = 7.8, 1.2$  Hz, 1H), 7.31 (dd,  $J = 8.1, 7.9$  Hz, 1H), 7.21 (dd,  $J = 8.3, 1.3$  Hz, 1H), 4.40 (q,  $J = 7.1$  Hz, 2H), 1.39 (t,  $J = 7.1$  Hz, 3H), 1.16 (s, 21H).  **$^{13}\text{C NMR}$**  (101 MHz, Chloroform-*d*)  $\delta$  165.7 (d,  $J = 3.3$  Hz), 164.4 (d,  $J = 252.2$  Hz), 135.1, 128.9 (d,  $J = 8.5$  Hz), 125.6 (d,  $J = 3.6$  Hz), 118.5 (d,  $J = 22.1$  Hz), 112.4 (d,  $J = 17.8$  Hz), 103.5 (d,  $J = 4.9$  Hz), 97.2, 61.6, 18.8 (6C), 14.4, 11.4 (3C).  **$^{19}\text{F NMR}$**  ( $^{19}\text{F}\{^1\text{H}\}$ , 376 MHz, Chloroform-*d*)  $\delta$  -107.23. **HRMS** (ESI+)  $m/z$  calc. for  $\text{C}_{20}\text{H}_{30}\text{FO}_2\text{Si}^+ [\text{M}+\text{H}]^+$ : 349.1994; found: 349.2003.

**Ethyl 5-fluoro-2-((triisopropylsilyl)ethynyl)benzoate (3j)**

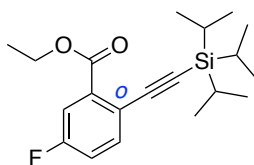

Compound **3j** was obtained as a colorless oil (8.3 mg, 0.02 mmol, 12% yield).  $^1\text{H NMR}$  ( $^1\text{H}\{^{19}\text{F}\}$ , 400 MHz, Chloroform-*d*)  $\delta$  7.57 (d,  $J = 8.9$  Hz, 1H),  $\delta$  7.55 (d,  $J = 2.7$  Hz, 1H), 7.13 (dd,  $J = 8.6$ , 2.8 Hz, 1H), 4.39 (q,  $J = 7.1$  Hz, 2H), 1.38 (t,  $J = 7.1$  Hz, 3H), 1.14 (s, 21H).  $^{13}\text{C NMR}$  (101 MHz, Chloroform-*d*)  $\delta$  165.4, 161.8 (d,  $J = 250.7$  Hz), 137.1, 135.1, 119.8, 118.8 (d,  $J = 21.9$  Hz), 117.1 (d,  $J = 24.1$  Hz), 104.2, 96.3, 61.7, 18.8 (6C), 14.4, 11.5 (3C).  $^{19}\text{F NMR}$  ( $^{19}\text{F}\{^1\text{H}\}$  376 MHz, Chloroform-*d*)  $\delta$  -110.66. **HRMS** (ESI+)  $m/z$  calc. for  $\text{C}_{20}\text{H}_{29}\text{FNaO}_2\text{Si}^+$   $[\text{M}+\text{Na}]^+$ : 371.1813; found: 371.1819.

**Ethyl 3-fluoro-2,6-bis((triisopropylsilyl)ethynyl)benzoate (3j'')**

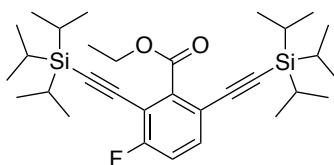

Compound **3j''** was obtained as a colorless oil (7.5 mg, 0.01 mmol, 7% yield).  $^1\text{H NMR}$  (500 MHz, Chloroform-*d*)  $\delta$  7.41 (dd,  $J = 8.6$ , 5.0 Hz, 1H), 7.04 (t,  $J = 8.6$  Hz, 1H), 4.36 (q,  $J = 7.2$  Hz, 2H), 1.37 (t,  $J = 7.2$  Hz, 3H), 1.12 (s, 21H), 1.10 (s, 21H).  $^{13}\text{C NMR}$  (126 MHz, Chloroform-*d*)  $\delta$  166.36 (d,  $J = 3.1$  Hz), 162.72 (d,  $J = 256.9$  Hz), 141.69, 134.26 (d,  $J = 8.3$  Hz), 117.24 (d,  $J = 4.2$  Hz), 116.45 (d,  $J = 22.2$  Hz), 110.56 (d,  $J = 19.1$  Hz), 102.28, 101.96 (d,  $J = 3.7$  Hz), 96.0, 95.1, 62.2, 18.74 (6C), 18.70 (6C), 14.1, 11.4 (3C), 11.3 (3C).  $^{19}\text{F NMR}$  (376 MHz, Chloroform-*d*)  $\delta$  -106.42. **HRMS** (ESI+)  $m/z$  calc. for  $\text{C}_{31}\text{H}_{49}\text{FNaO}_2\text{Si}_2^+$   $[\text{M}+\text{Na}]^+$ : 551.3147; found: 551.3154. **Mp** 61-66 °C.

**Ethyl 5-bromo-2-((triisopropylsilyl)ethynyl)benzoate (3k)**

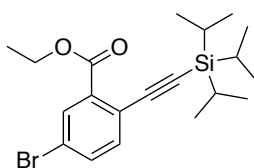

The title compound was prepared by reaction between  $(\text{RhCp}^*\text{Cl}_2)_2$  (3.09 mg, 0.005 mmol, 0.025 equiv),  $\text{AgSbF}_6$  (13.74 mg, 0.04 mmol, 0.20 equiv),  $\text{LiOAc}$  (2.64 mg, 0.04 mmol, 0.20 equiv),

Ag<sub>2</sub>CO<sub>3</sub> (55 mg, 0.2 mmol, 1 equiv), ethyl 3-bromobenzoate (**2k**) (45.8 mg, 32 μL, 0.20 mmol), and 1-bromo-2-(triisopropylsilyl)acetylene (**1**) (105 mg, 90 μL, 0.40 mmol, 2 equiv) according to general procedure, at 45 °C for 72 h, and obtained as a colorless oil (50 mg, 0.12 mmol, 61% yield). <sup>1</sup>H NMR (500 MHz, Chloroform-*d*) δ 7.99 (d, *J* = 2.1 Hz, 1H), 7.54 (dd, *J* = 8.3, 2.1 Hz, 1H), 7.44 (d, *J* = 8.3 Hz, 1H), 4.38 (q, *J* = 7.1 Hz, 2H), 1.38 (t, *J* = 7.1 Hz, 3H), 1.14 (s, 21H). <sup>13</sup>C NMR (126 MHz, Chloroform-*d*) δ 165.1, 136.2, 134.5, 134.2, 132.8, 122.4, 121.9, 104.1, 98.0, 61.6, 18.7 (6C), 14.3, 11.3 (3C). HRMS (ESI+) *m/z* calc. for C<sub>20</sub>H<sub>29</sub>BrNaO<sub>2</sub>Si<sup>+</sup> [M+Na]<sup>+</sup>: 431.1012; found: 431.1012.

**Ethyl 3-bromo-2,6-bis((triisopropylsilyl)ethynyl)benzoate (3k'')**

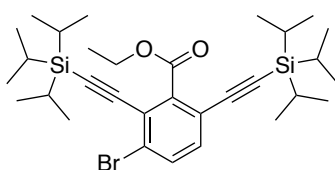

Compound **3k''** was obtained as a colorless oil (17 mg, 0.03 mmol, 14% yield). <sup>1</sup>H NMR (500 MHz, Chloroform-*d*) δ 7.55 (d, *J* = 8.4 Hz, 1H), 7.26 (d, *J* = 8.3 Hz, 1H), 4.35 (q, *J* = 7.2 Hz, 2H), 1.36 (t, *J* = 7.2 Hz, 3H), 1.13 (s, 21H), 1.10 (s, 21H). <sup>13</sup>C NMR (126 MHz, Chloroform-*d*) δ 166.7, 141.5, 133.1, 133.0, 126.5, 123.1, 120.1, 102.4, 101.7, 101.3, 96.7, 62.3, 18.8 (6C), 18.7 (6C), 14.1, 11.40 (3C), 11.37 (3C). HRMS (ESI+) *m/z* calc. for C<sub>31</sub>H<sub>50</sub>BrO<sub>2</sub>Si<sub>2</sub><sup>+</sup> [M+H]<sup>+</sup>: 589.2527; found: 589.2519.

**Ethyl 3-methoxy-2-((triisopropylsilyl)ethynyl)benzoate (3l')**

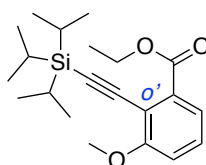

The title compound was prepared by reaction between (RhCp\*Cl<sub>2</sub>)<sub>2</sub> (3.09 mg, 0.005 mmol, 0.025 equiv), AgSbF<sub>6</sub> (13.74 mg, 0.04 mmol, 0.20 equiv), LiOAc (2.64 mg, 0.04 mmol, 0.20 equiv), Ag<sub>2</sub>CO<sub>3</sub> (55 mg, 0.2 mmol, 1 equiv), ethyl 3-methoxybenzoate (**2l**) (36 mg, 32.8 μL 0.20 mmol), and 1-bromo-2-(triisopropylsilyl)acetylene (**1**) (105 mg, 90 μL, 0.40 mmol, 2 equiv) according to general procedure, at 45 °C for 20 h, and obtained as an inseparable mixture with its monoalkynylated regioisomer (**3l**) in a ratio 1.4:1 as a colorless oil (39 mg, 0.11 mmol, 55% yield). <sup>1</sup>H NMR (500 MHz, Chloroform-*d*) δ 7.36 (dd, *J* = 7.8, 1.2 Hz, 1H), 7.28 (dd, *J* = 8.3, 7.8 Hz, 1H), 6.99 (dd, *J* = 8.3, 1.1 Hz, 1H), 4.37 (q, *J* = 7.1 Hz, 2H), 3.87 (s, 3H), 1.37 (t, *J* = 7.1 Hz, 3H), 1.15 (s, 21H). <sup>13</sup>C NMR (126 MHz, Chloroform-*d*) δ 167.1, 162.0, 135.5, 128.8, 121.5,

113.7, 112.8, 101.7, 100.2, 61.4, 56.3, 18.8 (6C), 14.4, 11.6 (3C). **HRMS** (ESI+)  $m/z$  calc. for  $C_{21}H_{32}NaO_3Si^+$   $[M+Na]^+$ : 383.2013; found: 383.2011.

**Ethyl 5-methoxy-2-((triisopropylsilyl)ethynyl)benzoate (31)**

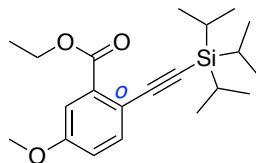

Compound **31** was obtained in an inseparable mixture with its monoalkynylated regioisomer (**31'**) in a ratio 1:1.4 as a colorless oil (39 mg, 0.11 mmol, 55% yield).  $^1H$  NMR (500 MHz, Chloroform-*d*)  $\delta$  7.50 (d,  $J$  = 8.5 Hz, 1H), 7.35 (d,  $J$  = 2.7 Hz, 1H), 6.96 (dd,  $J$  = 8.6, 2.8 Hz, 1H), 4.39 (q,  $J$  = 7.1 Hz, 2H), 3.84 (s, 3H), 1.38 (t,  $J$  = 7.1 Hz, 3H), 1.14 (s, 21H).  $^{13}C$  NMR (126 MHz, Chloroform-*d*)  $\delta$  166.6, 159.2, 136.5, 134.6, 117.9, 115.8, 114.6, 105.3, 94.2, 61.5, 55.7, 18.9 (6C), 14.5, 11.6 (3C). **HRMS** (ESI+)  $m/z$  calc. for  $C_{21}H_{32}NaO_3Si^+$   $[M+Na]^+$ : 383.2013; found: 383.2016.

**Ethyl 3-methoxy-2,6-bis((triisopropylsilyl)ethynyl)benzoate (31'')**

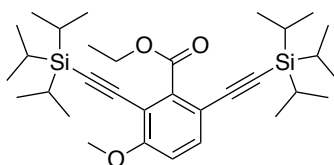

Compound **31''** was obtained as a slightly beige solid (15 mg, 0.03 mmol, 14% yield).  $^1H$  NMR (500 MHz, Chloroform-*d*)  $\delta$  7.40 (d,  $J$  = 8.6 Hz, 1H), 6.81 (d,  $J$  = 8.7 Hz, 1H), 4.34 (q,  $J$  = 7.2 Hz, 2H), 3.86 (s, 3H), 1.35 (t,  $J$  = 7.2 Hz, 3H), 1.11 (s, 21H), 1.10 (s, 21H).  $^{13}C$  NMR (126 MHz, Chloroform-*d*)  $\delta$  167.2, 160.8, 141.6, 134.1, 113.0, 111.4, 111.0, 103.3, 100.1, 99.1, 93.0, 62.0, 56.4, 18.77 (6C), 18.75 (6C), 14.1, 11.4 (6C). **HRMS** (ESI+)  $m/z$  calc. for  $C_{32}H_{52}NaO_3Si_2^+$   $[M+Na]^+$ : 563.3347; found: 563.3359. **Mp**: 85-90 °C.

**Ethyl 5-(trifluoromethyl)-2-((triisopropylsilyl)ethynyl)benzoate (3m)**

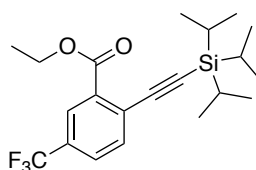

The title compound was prepared by reaction between  $(RhCp^*Cl_2)_2$  (3.09 mg, 0.005 mmol, 0.025 equiv),  $AgSbF_6$  (13.74 mg, 0.04 mmol, 0.20 equiv),  $LiOAc$  (2.64 mg, 0.04 mmol, 0.20 equiv),

Ag<sub>2</sub>CO<sub>3</sub> (55 mg, 0.2 mmol, 1 equiv), ethyl 3-(trifluoromethyl)benzoate (**2m**) (43.6 mg, 35.5 μL, 0.20 mmol), and 1-bromo-2-(triisopropylsilyl)acetylene (**1**) (105 mg, 90 μL, 0.40 mmol, 2 equiv) according to general procedure, at 45 °C for 72 h, and obtained as a colorless oil (62 mg, 0.16 mmol, 78% yield). **<sup>1</sup>H NMR** (400 MHz, Chloroform-*d*) δ 8.12 (d, *J* = 1.6 Hz, 1H), 7.70 (d, *J* = 8.1 Hz, 1H), 7.65 (dd, *J* = 8.3, 1.6 Hz, 1H), 4.42 (q, *J* = 7.1 Hz, 2H), 1.40 (t, *J* = 7.1 Hz, 3H), 1.15 (s, 21H). **<sup>13</sup>C NMR** (101 MHz, Chloroform-*d*) δ 165.3, 135.6, 133.7, 130.0 (q, *J* = 33.4 Hz), 127.7 (q, *J* = 3.6 Hz), 127.2, 127.1 (q, *J* = 3.6 Hz), 123.6 (q, *J* = 273 Hz), 103.91, 100.3, 61.8, 18.8 (6C), 14.4, 11.5 (3C). **<sup>19</sup>F NMR** (<sup>19</sup>F{<sup>1</sup>H}, 376 MHz, Chloroform-*d*) δ -63.05. **HRMS** (ESI+) *m/z* calc. for C<sub>21</sub>H<sub>29</sub>F<sub>3</sub>NaO<sub>2</sub>Si<sup>+</sup> [M+Na]<sup>+</sup>: 421.1781; found: 421.1782.

***Ethyl 4-methyl-2-((triisopropylsilyl)ethynyl)benzoate (3n)***

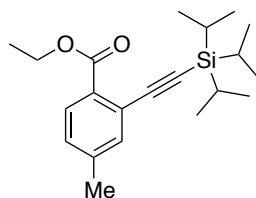

The title compound was prepared by reaction between (RhCp\*Cl<sub>2</sub>)<sub>2</sub> (3.09 mg, 0.005 mmol, 0.025 equiv), AgSbF<sub>6</sub> (13.74 mg, 0.04 mmol, 0.20 equiv), LiOAc (2.64 mg, 0.04 mmol, 0.20 equiv), Ag<sub>2</sub>CO<sub>3</sub> (55 mg, 0.2 mmol, 1 equiv), ethyl 4-methylbenzoate (**2n**) (32.8 mg, 32 μL, 0.20 mmol), and 1-bromo-2-(triisopropylsilyl)acetylene (**1**) (105 mg, 90 μL, 0.40 mmol, 2 equiv) according to general procedure, at 45 °C for 24 h, and obtained as a colorless oil (37 mg, 0.11 mmol, 54% yield). **<sup>1</sup>H NMR** (400 MHz, Chloroform-*d*) δ 7.77 (d, *J* = 8.0 Hz, 1H), 7.39 (dt, *J* = 1.8, 0.7 Hz, 1H), 7.15 (ddd, *J* = 8.0, 1.8, 0.7 Hz, 1H), 4.37 (q, *J* = 7.1 Hz, 2H), 2.36 (brt, *J* = 0.7 Hz, 3H), 1.37 (t, *J* = 7.1 Hz, 3H), 1.15 (s, 21H). **<sup>13</sup>C NMR** (101 MHz, Chloroform-*d*) δ 166.6, 141.8, 135.6, 130.28, 130.26, 129.0, 123.5, 105.6, 95.9, 61.1, 21.3, 18.8 (6C), 14.5, 11.5 (3C). **HRMS** (ESI+) *m/z* calc. for C<sub>21</sub>H<sub>32</sub>NaO<sub>2</sub>Si<sup>+</sup> [M+Na]<sup>+</sup>: 367.2064; found: 367.2067.

***Ethyl 4-methyl-2,6-bis((triisopropylsilyl)ethynyl)benzoate (3n'')***

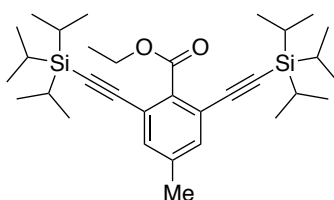

Compound **3n''** was obtained as a colorless oil (14 mg, 0.03 mmol, 13% yield). **<sup>1</sup>H NMR** (500 MHz, Chloroform-*d*) δ 7.26 (brq, *J* = 0.7 Hz, 2H), 4.34 (q, *J* = 7.2 Hz, 2H), 2.30 (brt, *J* = 0.7 Hz, 3H), 1.35 (t, *J* = 7.2 Hz, 3H), 1.11 (s, 42H). **<sup>13</sup>C NMR** (126 MHz, Chloroform-*d*) δ 167.7, 139.1,



137.2, 133.3 (2C), 121.1 (2C), 103.5 (2C), 94.8 (2C), 61.8, 21.0, 18.8 (12C), 14.2, 11.4 (6C).  
**HRMS** (ESI+)  $m/z$  calc. for  $C_{32}H_{53}O_2Si_2^+ [M+H]^+$ : 525.3579; found: 525.3579.

***Ethyl 4-(tert-butyl)-2-((triisopropylsilyl)ethynyl)benzoate (3o)***

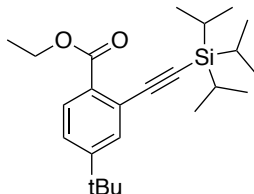

The title compound was prepared by reaction between  $(RhCp^*Cl_2)_2$  (3.09 mg, 0.005 mmol, 0.025 equiv),  $AgSbF_6$  (13.74 mg, 0.04 mmol, 0.20 equiv),  $LiOAc$  (2.64 mg, 0.04 mmol, 0.20 equiv),  $Ag_2CO_3$  (55 mg, 0.2 mmol, 1 equiv), ethyl 4-(tert-butyl)benzoate (**2o**) (41.3 mg, 42.5  $\mu$ L, 0.20 mmol), and 1-bromo-2-(triisopropylsilyl)acetylene (**1**) (105 mg, 90  $\mu$ L, 0.40 mmol, 2 equiv) according to general procedure, at 45 °C for 16 h, and obtained as a colorless oil (44 mg, 0.11 mmol, 57% yield).  **$^1H$  NMR** (500 MHz, Chloroform-*d*)  $\delta$  7.80 (d,  $J$  = 8.3 Hz, 1H), 7.57 (d,  $J$  = 2.0 Hz, 1H), 7.37 (dd,  $J$  = 8.3, 2.0 Hz, 1H), 4.38 (q,  $J$  = 7.1 Hz, 2H), 1.37 (t,  $J$  = 7.1 Hz, 3H), 1.32 (s, 9H), 1.16 (s, 21H).  **$^{13}C$  NMR** (126 MHz, Chloroform-*d*)  $\delta$  166.6, 154.8, 132.0, 130.4, 130.0, 125.5, 123.2, 105.9, 95.5, 61.1, 34.9, 31.1 (3C), 18.8 (6C), 14.5, 11.6 (3C). **HRMS** (ESI+)  $m/z$  calc. for  $C_{24}H_{38}NaO_2Si^+ [M+Na]^+$ : 409.2533; found: 409.2536.

***Ethyl 4-(tert-butyl)-2,6-bis((triisopropylsilyl)ethynyl)benzoate (3o'')***

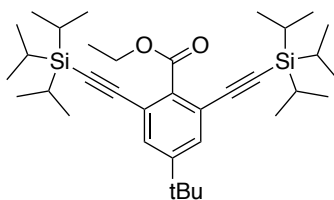

Compound **3o''** was obtained as a colorless oil (17 mg, 0.03 mmol, 15% yield).  **$^1H$  NMR** (500 MHz, Chloroform-*d*)  $\delta$  7.43 (s, 2H), 4.34 (q,  $J$  = 7.2 Hz, 2H), 1.35 (t,  $J$  = 7.2 Hz, 3H), 1.30 (s, 9H), 1.12 (s, 42H).  **$^{13}C$  NMR** (126 MHz, Chloroform-*d*)  $\delta$  167.7, 152.3, 137.3, 129.9 (2C), 120.9 (2C), 103.8 (2C), 94.5 (2C), 61.8, 34.8, 31.1 (3C), 18.8 (12C), 14.1, 11.5 (6C). **HRMS** (ESI+)  $m/z$  calc. for  $C_{35}H_{58}NaO_2Si_2^+ [M+Na]^+$ : 589.3868; found: 589.3878.

**Ethyl 4-fluoro-2-((triisopropylsilyl)ethynyl)benzoate (3p)**

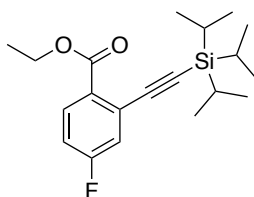

The title compound was prepared by reaction between  $(\text{RhCp}^*\text{Cl}_2)_2$  (3.09 mg, 0.005 mmol, 0.025 equiv),  $\text{AgSbF}_6$  (13.74 mg, 0.04 mmol, 0.20 equiv),  $\text{LiOAc}$  (2.64 mg, 0.04 mmol, 0.20 equiv),  $\text{Ag}_2\text{CO}_3$  (55 mg, 0.2 mmol, 1 equiv), ethyl 4-fluorobenzoate (**2p**) (33.6 mg, 0.20 mmol), and 1-bromo-2-(triisopropylsilyl)acetylene (**1**) (105 mg, 90  $\mu\text{L}$ , 0.40 mmol, 2 equiv) according to general procedure, at 45 °C for 20 h, and obtained as a colorless oil (34 mg, 0.14 mmol, 48% yield).  **$^1\text{H NMR}$**  (500 MHz, Chloroform-*d*)  $\delta$  7.90 (dd,  $J = 8.8, 5.8$  Hz, 1H), 7.26 (dd,  $J = 9.1, 2.7$  Hz, 1H), 7.04 (ddd,  $J = 8.8, 7.9, 2.7$  Hz, 1H), 4.38 (q,  $J = 7.1$  Hz, 2H), 1.38 (t,  $J = 7.1$  Hz, 3H), 1.15 (s, 21H).  **$^{13}\text{C NMR}$**  (126 MHz, Chloroform-*d*)  $\delta$  165.6, 164.1 (d,  $J = 253.3$  Hz), 132.7 (d,  $J = 9.5$  Hz), 129.2 (d,  $J = 3.2$  Hz), 126.2 (d,  $J = 10.2$  Hz), 121.7 (d,  $J = 23.0$  Hz), 115.6 (d,  $J = 21.7$  Hz), 104.1 (d,  $J = 2.5$  Hz), 98.4, 61.4, 18.8 (6C), 14.5, 11.5 (3C).  **$^{19}\text{F NMR}$**  ( $^{19}\text{F}\{^1\text{H}\}$ , 376 MHz, Chloroform-*d*)  $\delta$  -108.41. **HRMS** (ESI+)  $m/z$  calc. for  $\text{C}_{20}\text{H}_{29}\text{FNaO}_2\text{Si}^+$   $[\text{M}+\text{Na}]^+$ : 371.1813; found: 371.1816.

**Ethyl 4-methoxy-2-((triisopropylsilyl)ethynyl)benzoate (3q)**

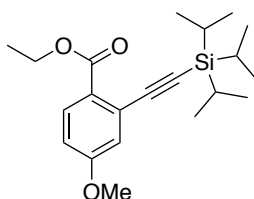

The title compound was prepared by reaction between  $(\text{RhCp}^*\text{Cl}_2)_2$  (3.09 mg, 0.005 mmol, 0.025 equiv),  $\text{AgSbF}_6$  (13.74 mg, 0.04 mmol, 0.20 equiv),  $\text{LiOAc}$  (2.64 mg, 0.04 mmol, 0.20 equiv),  $\text{Ag}_2\text{CO}_3$  (55 mg, 0.2 mmol, 1 equiv), ethyl 4-methoxybenzoate (**2q**) (36.0 mg, 32.7  $\mu\text{L}$ , 0.20 mmol), and 1-bromo-2-(triisopropylsilyl)acetylene (**1**) (105 mg, 90  $\mu\text{L}$ , 0.40 mmol, 2 equiv) according to general procedure, at 45 °C for 24 h, and obtained as a colorless oil (36 mg, 0.1 mmol, 50% yield).  **$^1\text{H NMR}$**  (400 MHz, Chloroform-*d*)  $\delta$  7.88 (d,  $J = 8.8$  Hz, 1H), 7.06 (d,  $J = 2.7$  Hz, 1H), 6.86 (dd,  $J = 8.8, 2.7$  Hz, 1H), 4.36 (q,  $J = 7.1$  Hz, 2H), 3.84 (s, 3H), 1.37 (t,  $J = 7.1$  Hz, 3H), 1.15 (s, 21H).  **$^{13}\text{C NMR}$**  (101 MHz, Chloroform-*d*)  $\delta$  166.1, 161.8, 132.4, 125.5, 125.3, 120.0, 114.1, 105.4, 96.5, 60.9, 55.6, 18.8 (6C), 14.6, 11.5 (3C). **HRMS** (ESI+)  $m/z$  calc. for  $\text{C}_{21}\text{H}_{32}\text{NaO}_3\text{Si}^+$   $[\text{M}+\text{Na}]^+$ : 383.2013; found: 383.2016.

***Ethyl 4-methoxy-2,6-bis((triisopropylsilyl)ethynyl)benzoate (3q'')***

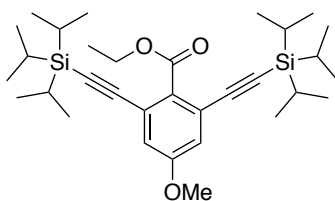

Compound **3q''** was obtained as a colorless oil (17 mg, 0.03 mmol, 16% yield). **<sup>1</sup>H NMR** (500 MHz, Chloroform-*d*)  $\delta$  6.96 (s, 2H), 4.32 (q,  $J = 7.2$  Hz, 2H), 3.81 (s, 3H), 1.35 (t,  $J = 7.2$  Hz, 3H), 1.11 (s, 42H). **<sup>13</sup>C NMR** (126 MHz, Chloroform-*d*)  $\delta$  167.5, 159.4, 132.7, 122.7 (2C), 118.4 (2C), 103.4 (2C), 95.2 (2C), 61.8, 55.7, 18.7 (12C), 14.2, 11.4 (6C). **HRMS** (ESI+)  $m/z$  calc. for  $C_{32}H_{52}NaO_3Si_2^+$   $[M+Na]^+$ : 563.3347; found: 563.3346.

***Ethyl 4-hydroxy-2-((triisopropylsilyl)ethynyl)benzoate (3r)***

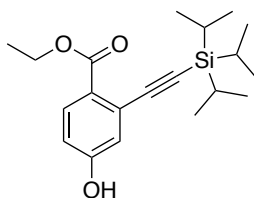

The title compound was prepared by reaction between  $(RhCp^*Cl_2)_2$  (3.09 mg, 0.005 mmol, 0.025 equiv),  $AgSbF_6$  (13.74 mg, 0.04 mmol, 0.20 equiv),  $LiOAc$  (2.64 mg, 0.04 mmol, 0.20 equiv),  $Ag_2CO_3$  (55 mg, 0.2 mmol, 1 equiv), ethyl 4-hydroxybenzoate (**2r**) (33.2 mg, 42.5  $\mu$ L, 0.20 mmol), and 1-bromo-2-(triisopropylsilyl)acetylene (**1**) (105 mg, 90  $\mu$ L, 0.40 mmol, 2 equiv) according to general procedure, at 45 °C for 48 h, and obtained as a white solid (16 mg, 0.05 mmol, 23% yield). **<sup>1</sup>H NMR** (500 MHz, Chloroform-*d*)  $\delta$  7.83 (d,  $J = 8.7$  Hz, 1H), 7.05 (d,  $J = 2.6$  Hz, 1H), 6.81 (dd,  $J = 8.6, 2.6$  Hz, 1H), 4.36 (q,  $J = 7.1$  Hz, 2H), 1.37 (t,  $J = 7.1$  Hz, 3H), 1.14 (s, 21H). **<sup>13</sup>C NMR** (126 MHz, Chloroform-*d*)  $\delta$  166.5, 158.5, 132.8, 125.8, 125.0, 121.8, 115.6, 105.2, 96.9, 61.2, 18.8 (6C), 14.5, 11.5 (3C). **HRMS** (ESI+)  $m/z$  calc. for  $C_{20}H_{30}NaO_3Si^+$   $[M+Na]^+$ : 369.1856; found: 369.1859. **Mp**: 64-68 °C.

***Ethyl 4-nitro-2-((triisopropylsilyl)ethynyl)benzoate (3s)***

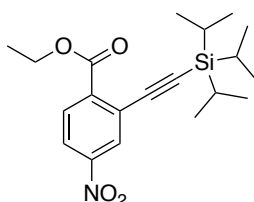

The title compound was prepared by reaction between  $(\text{RhCp}^*\text{Cl}_2)_2$  (3.09 mg, 0.005 mmol, 0.025 equiv),  $\text{AgSbF}_6$  (13.74 mg, 0.04 mmol, 0.20 equiv),  $\text{LiOAc}$  (2.64 mg, 0.04 mmol, 0.20 equiv),  $\text{Ag}_2\text{CO}_3$  (55 mg, 0.2 mmol, 1 equiv), ethyl 4-nitrobenzoate (**2s**) (39.0 mg, 0.20 mmol), and 1-bromo-2-(triisopropylsilyl)acetylene (**1**) (105 mg, 90  $\mu\text{L}$ , 0.40 mmol, 2 equiv) according to general procedure, at 45 °C for 20 h, and obtained as an orange oil (37 mg, 0.07 mmol, 36% yield).  $^1\text{H NMR}$  (500 MHz, Chloroform-*d*)  $\delta$  8.36 (d,  $J = 2.3$  Hz, 1H), 8.15 (dd,  $J = 8.6, 2.3$  Hz, 1H), 7.97 (d,  $J = 8.6$  Hz, 1H), 4.42 (q,  $J = 7.1$  Hz, 2H), 1.40 (t,  $J = 7.1$  Hz, 3H), 1.15 (s, 21H).  $^{13}\text{C NMR}$  (126 MHz, Chloroform-*d*)  $\delta$  165.1, 149.2, 138.6, 131.0, 129.4, 125.1, 122.5, 102.6, 100.6, 62.2, 18.8 (6C), 14.4, 11.4 (3C). **HRMS** (ESI+)  $m/z$  calc. for  $\text{C}_{20}\text{H}_{29}\text{NNaO}_4\text{Si}^+$   $[\text{M}+\text{Na}]^+$ : 398.1758; found: 398.1761.

***Ethyl 4-nitro-2,6-bis((triisopropylsilyl)ethynyl)benzoate (3s'')***

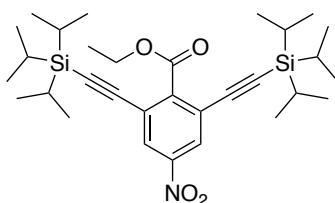

Compound **3s''** was obtained as an orange oil (14 mg, 0.03 mmol, 13% yield).  $^1\text{H NMR}$  (500 MHz, Chloroform-*d*)  $\delta$  8.22 (s, 2H), 4.38 (q,  $J = 7.2$  Hz, 2H), 1.37 (t,  $J = 7.2$  Hz, 3H), 1.12 (s, 42H).  $^{13}\text{C NMR}$  (126 MHz, Chloroform-*d*)  $\delta$  167.1, 147.7, 144.7, 126.9 (2C), 123.1 (2C), 101.0 (2C), 99.3 (2C), 62.6, 18.7 (12C), 12.8, 11.3 (6C). **HRMS** (ESI+)  $m/z$  calc. for  $\text{C}_{31}\text{H}_{49}\text{NNaO}_4\text{Si}_2^+$   $[\text{M}+\text{Na}]^+$ : 578.3092; found: 578.3102.

***Dimethyl 2-((triisopropylsilyl)ethynyl)terephthalate (3t)***

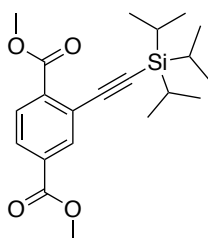

The title compound was prepared by reaction between  $(\text{RhCp}^*\text{Cl}_2)_2$  (3.09 mg, 0.005 mmol, 0.025 equiv),  $\text{AgSbF}_6$  (13.74 mg, 0.04 mmol, 0.20 equiv),  $\text{LiOAc}$  (2.64 mg, 0.04 mmol, 0.20 equiv),  $\text{Ag}_2\text{CO}_3$  (55 mg, 0.2 mmol, 1 equiv), dimethyl terephthalate (**2t**) (38.8 mg, 0.20 mmol), and 1-bromo-2-(triisopropylsilyl)acetylene (**1**) (105 mg, 90  $\mu\text{L}$ , 0.40 mmol, 2 equiv) according to general procedure, at 45 °C for 20 h, and obtained as a colorless oil (36 mg, 0.1 mmol, 48% yield).

**<sup>1</sup>H NMR** (500 MHz, Chloroform-*d*) δ 8.20 (dd, *J* = 1.7, 0.6 Hz, 1H), 7.98 (dd, *J* = 8.2, 1.7 Hz, 1H), 7.90 (dd, *J* = 8.2, 0.5 Hz, 1H), 3.94 (s, 3H), 3.92 (s, 3H), 1.15 (s, 21H). **<sup>13</sup>C NMR** (126 MHz, Chloroform-*d*) δ 166.6, 165.8, 136.5, 135.8, 132.8, 130.3, 128.8, 123.8, 104.1, 97.8, 52.7, 52.6, 18.8 (6C), 11.5 (3C). **HRMS** (ESI+) *m/z* calc. for C<sub>21</sub>H<sub>30</sub>NaO<sub>4</sub>Si<sup>+</sup> [M+Na]<sup>+</sup>: 397.1806; found: 397.1811.

***Ethyl 2-((triisopropylsilyl)ethynyl)-1-naphthoate (3u)***

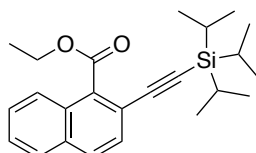

The title compound was prepared by reaction between (RhCp\*Cl<sub>2</sub>)<sub>2</sub> (3.09 mg, 0.005 mmol, 0.025 equiv), AgSbF<sub>6</sub> (13.74 mg, 0.04 mmol, 0.20 equiv), LiOAc (2.64 mg, 0.04 mmol, 0.20 equiv), Ag<sub>2</sub>CO<sub>3</sub> (55 mg, 0.2 mmol, 1 equiv), ethyl 1-naphthoate (**2u**) (40.0 mg, 0.20 mmol), and 1-bromo-2-(triisopropylsilyl)acetylene (**1**) (105 mg, 90 μL, 0.40 mmol, 2 equiv) according to general procedure, at 70 °C for 24 h, and obtained as a colorless oil (62 mg, 0.16 mmol, 81% yield). **<sup>1</sup>H NMR** (500 MHz, Chloroform-*d*) δ 7.86 – 7.75 (m, 3H), 7.57 – 7.45 (m, 3H), 4.53 (q, *J* = 7.2 Hz, 2H), 1.46 (t, *J* = 7.2 Hz, 3H), 1.17 (s, 21H). **<sup>13</sup>C NMR** (126 MHz, Chloroform-*d*) δ 168.5, 135.1, 132.8, 129.5, 129.4, 129.0, 128.3, 127.7, 127.1, 125.1, 119.0, 104.7, 96.1, 61.9, 18.8 (6C), 14.4, 11.5 (3C). **HRMS** (ESI+) *m/z* calc. for C<sub>24</sub>H<sub>33</sub>O<sub>2</sub>Si<sup>+</sup> [M+H]<sup>+</sup>: 381.2244; found: 381.2250.

***Ethyl 3-((triisopropylsilyl)ethynyl)-2-naphthoate (3v)***

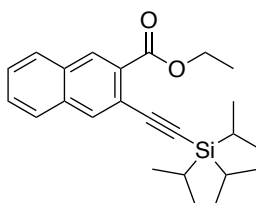

The title compound was prepared by reaction between (RhCp\*Cl<sub>2</sub>)<sub>2</sub> (3.09 mg, 0.005 mmol, 0.025 equiv), AgSbF<sub>6</sub> (13.74 mg, 0.04 mmol, 0.20 equiv), LiOAc (2.64 mg, 0.04 mmol, 0.20 equiv), Ag<sub>2</sub>CO<sub>3</sub> (55 mg, 0.2 mmol, 1 equiv), ethyl 2-naphthoate (**2v**) (40.0 mg, 42.2 μL, 0.20 mmol), and 1-bromo-2-(triisopropylsilyl)acetylene (**1**) (105 mg, 90 μL, 0.40 mmol, 2 equiv) according to general procedure, at 45 °C for 20 h, and obtained as a colorless oil (47 mg, 0.12 mmol, 62% yield). **<sup>1</sup>H NMR** (500 MHz, Chloroform-*d*) δ 8.39 (s, 1H), 8.10 (s, 1H), 7.87 (ddd, *J* = 8.0, 1.5, 0.7 Hz, 1H), 7.80 (ddd, *J* = 7.9, 1.4, 0.7 Hz, 1H), 7.58-7.50 (m, 2H), 4.45 (q, *J* = 7.1 Hz, 2H), 1.44 (t, *J* = 7.1 Hz, 3H), 1.19 (s, 21H). **<sup>13</sup>C NMR** (126 MHz, Chloroform-*d*) δ 166.7, 135.3, 134.2,

131.8, 131.1, 130.0, 128.9, 128.5, 127.5, 127.4, 119.5, 105.6, 95.2, 61.4, 18.9 (6C), 14.5, 11.6 (3C). **HRMS** (ESI+)  $m/z$  calc. for  $C_{24}H_{32}NaO_2Si^+$   $[M+Na]^+$ : 403.2064; found: 403.2070.

**Ethyl 5-((triisopropylsilyl)ethynyl)-5a1,10-dihydropyrene-4-carboxylate (3w)**

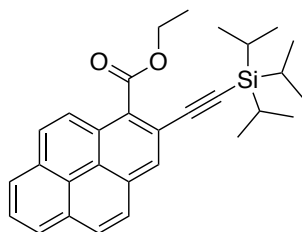

The title compound was prepared by reaction between  $(RhCp^*Cl_2)_2$  (2.25 mg, 0.004 mmol, 0.025 equiv),  $AgSbF_6$ , (10 mg, 0.03 mmol, 0.20 equiv),  $LiOAc$  (1.92 mg, 0.03 mmol, 0.20 equiv),  $Ag_2CO_3$  (40.2 mg, 0.15 mmol, 1 equiv), ethyl pyrene-1-carboxylate (**2w**) (40 mg, 0.146 mmol), and 1-bromo-2-(triisopropylsilyl)acetylene (**1**) (76 mg, 66  $\mu$ L, 0.29 mmol, 2 equiv) according to general procedure, at 45 °C for 48 h, and obtained as a beige solid (56 mg, 0.12 mmol, 84% yield).  **$^1H$  NMR** (500 MHz, Chloroform-*d*)  $\delta$  8.28 (s, 1H),  $\delta$  8.17 (d,  $J = 7.6$  Hz, 1H),  $\delta$  8.16 (d,  $J = 7.5$  Hz, 1H), 8.11 (d,  $J = 9.2$  Hz, 1H), 8.08 (d,  $J = 9.2$  Hz, 1H), 8.05 (d,  $J = 8.9$  Hz, 1H), 8.00 (t,  $J = 7.6$  Hz, 1H), 7.94 (d,  $J = 8.9$  Hz, 1H), 4.64 (q,  $J = 7.2$  Hz, 2H), 1.53 (t,  $J = 7.2$  Hz, 3H), 1.23 (s, 21H).  **$^{13}C$  NMR** (126 MHz, Chloroform-*d*)  $\delta$  168.9, 131.7, 131.3, 131.1, 130.8, 129.3, 129.1, 129.0, 128.1, 126.8, 126.6, 126.2, 126.0, 124.2, 124.0, 123.9, 118.7, 105.1, 95.2, 62.0, 18.9 (6C), 14.5, 11.6 (3C). **HRMS** (ESI+)  $m/z$  calc. for  $C_{30}H_{35}O_2Si^+$   $[M+H]^+$ : 455.2401; found: 455.2404.  $m/z$  calc. for  $C_{30}H_{34}NaO_2Si^+$   $[M+Na]^+$ : 477.2220; found: 477.2213. **Mp**: 96-100 °C.

**Methyl 5-methyl-3-((triisopropylsilyl)ethynyl)furan-2-carboxylate (3x)**

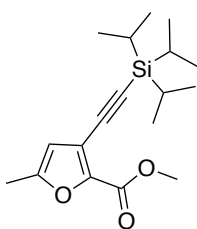

The title compound was prepared by reaction between  $(RhCp^*Cl_2)_2$  (3.09 mg, 0.005 mmol, 0.025 equiv),  $AgSbF_6$ , (13.74 mg, 0.04 mmol, 0.20 equiv),  $LiOAc$  (2.64 mg, 0.04 mmol, 0.20 equiv),  $Ag_2CO_3$  (55 mg, 0.2 mmol, 1 equiv), methyl 5-methylfuran-2-carboxylate (**2x**) (28.0 mg, 25.6  $\mu$ L, 0.20 mmol), and 1-bromo-2-(triisopropylsilyl)acetylene (**1**) (105 mg, 90  $\mu$ L, 0.40 mmol, 2 equiv) according to general procedure, at 70 °C for 72 h, and obtained as a slightly yellow oil (42 mg, 0.13 mmol, 66% yield).  **$^1H$  NMR** (400 MHz, Chloroform-*d*)  $\delta$  6.18 (q,  $J = 1.0$  Hz, 1H), 3.88 (s,

3H), 2.33 (d,  $J = 1.0$  Hz, 3H), 1.12 (s, 21H).  $^{13}\text{C}$  NMR (101 MHz, Chloroform- $d$ )  $\delta$  158.8, 156.2, 144.3, 116.0, 112.4, 99.2, 97.4, 51.9, 18.7 (6C), 13.8, 11.4 (3C). HRMS (ESI+)  $m/z$  calc. for  $\text{C}_{18}\text{H}_{28}\text{NaO}_3\text{Si}^+ [\text{M}+\text{Na}]^+$ : 343.1700; found: 343.1706.

**Methyl 3-((triisopropylsilyl)ethynyl)thiophene-2-carboxylate (3y)**

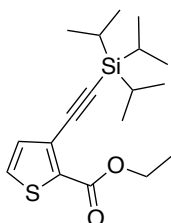

The title compound was prepared by reaction between  $(\text{RhCp}^*\text{Cl}_2)_2$  (3.09 mg, 0.005 mmol, 0.025 equiv),  $\text{AgSbF}_6$  (13.74 mg, 0.04 mmol, 0.20 equiv),  $\text{LiOAc}$  (2.64 mg, 0.04 mmol, 0.20 equiv),  $\text{Ag}_2\text{CO}_3$  (55 mg, 0.2 mmol, 1 equiv), ethyl thiophene-2-carboxylate (**2y**) (31.2 mg, 26.9  $\mu\text{L}$ , 0.20 mmol), and 1-bromo-2-(triisopropylsilyl)acetylene (**1**) (105 mg, 90  $\mu\text{L}$ , 0.40 mmol, 2 equiv) according to general procedure, at 70  $^\circ\text{C}$  for 48 h, and obtained as a yellow oil (57 mg, 0.17 mmol, 85% yield).  $^1\text{H}$  NMR (400 MHz, Chloroform- $d$ )  $\delta$  7.41 (d,  $J = 5.1$  Hz, 1H), 7.15 (d,  $J = 5.1$  Hz, 1H), 4.40 (q,  $J = 7.1$  Hz, 2H), 1.39 (t,  $J = 7.1$  Hz, 3H), 1.17 (s, 21H).  $^{13}\text{C}$  NMR (101 MHz, Chloroform- $d$ )  $\delta$  161.5, 135.1, 133.4, 130.1, 126.9, 100.6, 97.8, 61.4, 18.8 (6C), 14.5, 11.4 (3C). HRMS (ESI+)  $m/z$  calc. for  $\text{C}_{18}\text{H}_{28}\text{NaO}_2\text{SSi}^+ [\text{M}+\text{Na}]^+$ : 359.1471; found: 359.1475.

**8-((Triisopropylsilyl)ethynyl)isochroman-1-one (3z)**

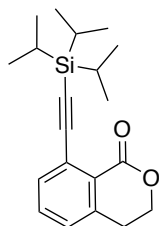

The title compound was prepared by reaction between  $(\text{RhCp}^*\text{Cl}_2)_2$  (3.09 mg, 0.005 mmol, 0.025 equiv),  $\text{AgSbF}_6$  (13.74 mg, 0.04 mmol, 0.20 equiv),  $\text{LiOAc}$  (2.64 mg, 0.04 mmol, 0.20 equiv),  $\text{Ag}_2\text{CO}_3$  (55 mg, 0.2 mmol, 1 equiv), isochroman-1-one (**2z**) (29.6 mg, 24.96  $\mu\text{L}$ , 0.20 mmol), and 1-bromo-2-(triisopropylsilyl)acetylene (**1**) (105 mg, 90  $\mu\text{L}$ , 0.40 mmol, 2 equiv) according to general procedure, at 45  $^\circ\text{C}$  for 72 h, and obtained as a colorless oil (22 mg, 0.05 mmol, 25% yield).  $^1\text{H}$  NMR (400 MHz, Chloroform- $d$ )  $\delta$  7.56 (dd,  $J = 7.8, 1.2$  Hz, 1H), 7.41 (t,  $J = 7.7$  Hz, 1H), 7.17 (dd,  $J = 7.6, 1.1$  Hz, 1H), 4.44 (t,  $J = 5.9$  Hz, 2H), 3.00 (t,  $J = 5.9$  Hz, 2H), 1.16 (s, 21H).  $^{13}\text{C}$  NMR (101 MHz, Chloroform- $d$ )  $\delta$  162.4, 140.7, 134.9, 132.2, 127.0, 126.4, 125.9,

104.7, 99.0, 66.6, 29.0, 18.8 (6C), 11.5 (3C). **HRMS** (ESI+)  $m/z$  calc. for  $C_{20}H_{29}O_2Si^+$   $[M+H]^+$ : 329.1931; found: 329.1948.

**Ethyl 2-(2-((triisopropylsilyl)ethynyl)phenyl)acetate (3aa)**

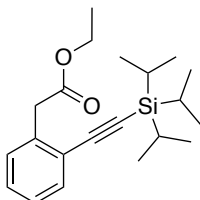

The title compound was prepared by reaction between  $(RhCp^*Cl_2)_2$  (3.09 mg, 0.005 mmol, 0.025 equiv),  $AgSbF_6$  (13.74 mg, 0.04 mmol, 0.20 equiv),  $LiOAc$  (2.64 mg, 0.04 mmol, 0.20 equiv),  $Ag_2CO_3$  (55 mg, 0.2 mmol, 1 equiv), ethyl 2-phenylacetate (**2aa**) (32.8 mg, 31.9  $\mu$ L, 0.20 mmol), and 1-bromo-2-(triisopropylsilyl)acetylene (**1**) (105 mg, 90  $\mu$ L, 0.40 mmol, 2 equiv) according to general procedure, at 90°C for 72 h, and obtained as a colorless oil (12 mg, 0.04 mmol, 18% yield).  **$^1H$  NMR** (500 MHz, Chloroform-*d*)  $\delta$  7.50 (dt,  $J = 7.6, 1.0$  Hz, 1H), 7.29-7.28 (m, 2H), 7.24-7.19 (m, 1H), 4.14 (q,  $J = 7.1$  Hz, 2H), 3.87 (s, 2H), 1.24 (t,  $J = 7.1$  Hz, 3H), 1.13 (s, 21H).  **$^{13}C$  NMR** (126 MHz, Chloroform-*d*)  $\delta$  171.2, 136.5, 132.9, 129.8, 128.6, 127.1, 124.0, 105.1, 95.2, 61.0, 39.9, 18.8 (6C), 14.3, 11.5 (3C). **HRMS** (ESI+)  $m/z$  calc. for  $C_{21}H_{33}O_2Si^+$   $[M+H]^+$ : 345.2244; found: 345.2234.

**Triisopropyl((2-(methoxymethyl)phenyl)ethynyl)silane (5a)**

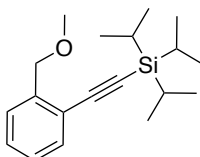

The title compound was prepared by reaction between  $(RhCp^*Cl_2)_2$  (3.71 mg, 0.006 mmol, 0.03 equiv),  $AgSbF_6$  (13.74 mg, 0.04 mmol, 0.20 equiv),  $LiOAc$  (2.64 mg, 0.04 mmol, 0.20 equiv),  $Ag_2CO_3$  (55 mg, 0.2 mmol, 1 equiv), (methoxymethyl)benzene (**4a**) (24.4 mg, 0.20 mmol), and 1-bromo-2-(triisopropylsilyl)acetylene (**1**) (110 mg, 95  $\mu$ L, 0.420 mmol, 2.1 equiv) according to general procedure, at 100 °C for 20 h, and obtained as a yellow oil (39 mg, 0.13 mmol, 64% yield).  **$^1H$  NMR** (500 MHz, Chloroform-*d*)  $\delta$  7.48 (dd,  $J = 7.7, 1.3$  Hz, 1H), 7.46 (dd,  $J = 7.7, 0.9$  Hz, 1H), 7.33 (td,  $J = 7.6, 1.4$  Hz, 1H), 7.22 (td,  $J = 7.5, 1.3$  Hz, 1H), 4.67 (s, 2H), 3.44 (s, 3H), 1.15 (s, 21H).  **$^{13}C$  NMR** (126 MHz, Chloroform-*d*)  $\delta$  140.5, 132.7, 128.7, 127.3, 127.2, 122.2, 104.6, 95.6, 72.9, 58.7, 18.8 (6C), 11.5 (3C). **HRMS** (ESI+)  $m/z$  calc. for  $C_{19}H_{30}NaOSi^+$   $[M+Na]^+$ : 325.1958; found: 325.1963.



***((3-Fluoro-2-(methoxymethyl)phenyl)ethynyl)triisopropylsilane (5h)***

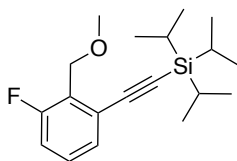

The title compound was prepared by reaction between  $(\text{RhCp}^*\text{Cl}_2)_2$  (3.71 mg, 0.006 mmol, 0.03 equiv),  $\text{AgSbF}_6$  (13.74 mg, 0.04 mmol, 0.20 equiv),  $\text{LiOAc}$  (2.64 mg, 0.04 mmol, 0.20 equiv),  $\text{Ag}_2\text{CO}_3$  (55 mg, 0.2 mmol, 1 equiv), 1-fluoro-2-(methoxymethyl)benzene (**4h**) (28 mg, 0.20 mmol), and 1-bromo-2-(triisopropylsilyl)acetylene (**1**) (110 mg, 95  $\mu\text{L}$ , 0.420 mmol, 2.1 equiv) according to general procedure, at 100 °C for 20 h, and obtained as a yellow oil (43,1 mg, 0.13 mmol, 67% yield).  $^1\text{H NMR}$  (500 MHz, Chloroform- $d$ )  $\delta$  7.31 (dd,  $J = 7.7, 1.1$  Hz, 1H), 7.23 (td,  $J = 8.0, 5.5$  Hz, 1H), 7.04 (ddd,  $J = 9.4, 8.2, 1.2$  Hz, 1H), 4.70 (d,  $J = 1.7$  Hz, 2H), 3.41 (s, 3H), 1.15 (s, 21H).  $^{13}\text{C NMR}$  (126 MHz, Chloroform- $d$ )  $\delta$  161.9 (d,  $J = 248.7$  Hz), 129.7 (d,  $J = 9.5$  Hz), 128.9 (d,  $J = 3.4$  Hz), 126.7 (d,  $J = 16.5$  Hz), 126.6 (d,  $J = 5.5$  Hz), 116.1 (d,  $J = 22.9$  Hz), 103.8 (d,  $J = 4.0$  Hz), 96.0, 66.4 (d,  $J = 3.1$  Hz), 58.4, 18.8 (6C), 11.5 (3C).  $^{19}\text{F NMR}$  ( $^{19}\text{F}\{^1\text{H}\}$ , 376 MHz, Chloroform- $d$ )  $\delta$  -116.64. **HRMS** (ESI+)  $m/z$  calc. for  $\text{C}_{19}\text{H}_{29}\text{FNaOSi}^+$   $[\text{M}+\text{Na}]^+$ : 343.1864; found: 343.1861.

***((3-Chloro-2-(methoxymethyl)phenyl)ethynyl)triisopropylsilane (5i)***

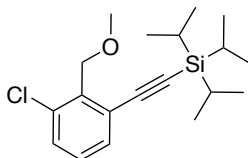

The title compound was prepared by reaction between  $(\text{RhCp}^*\text{Cl}_2)_2$  (3.71 mg, 0.006 mmol, 0.03 equiv),  $\text{AgSbF}_6$  (13.74 mg, 0.04 mmol, 0.20 equiv),  $\text{LiOAc}$  (2.64 mg, 0.04 mmol, 0.20 equiv),  $\text{Ag}_2\text{CO}_3$  (55 mg, 0.2 mmol, 1 equiv), 1-chloro-2-(methoxymethyl)benzene (**4i**) (31.3 mg, 0.20 mmol), and 1-bromo-2-(triisopropylsilyl)acetylene (**1**) (110 mg, 95  $\mu\text{L}$ , 0.420 mmol, 2.1 equiv) according to general procedure, at 100 °C for 20 h, and obtained as a yellow oil (45mg, 0.13 mmol, 67% yield).  $^1\text{H NMR}$  (500 MHz, Chloroform- $d$ )  $\delta$  7.42 (dd,  $J = 7.7, 1.3$  Hz, 1H), 7.36 (dd,  $J = 8.1, 1.3$  Hz, 1H), 7.19 (t,  $J = 7.9$  Hz, 1H), 4.79 (s, 2H), 3.42 (s, 3H), 1.15 (s, 21H).  $^{13}\text{C NMR}$  (126 MHz, Chloroform- $d$ )  $\delta$  136.9, 136.1, 131.7, 130.1, 129.2, 126.7, 104.3, 96.0, 70.1, 58.5, 18.8 (6C), 11.5 (3C). **HRMS** (ESI+)  $m/z$  calc. for  $\text{C}_{19}\text{H}_{29}\text{ClNaOSi}^+$   $[\text{M}+\text{Na}]^+$ : 359.1568; found: 359.1563.

***((3-Bromo-2-(methoxymethyl)phenyl)ethynyl)triisopropylsilane (5j)***

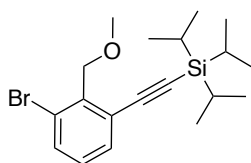

The title compound was prepared by reaction between  $(\text{RhCp}^*\text{Cl}_2)_2$  (3.71 mg, 0.006 mmol, 0.03 equiv),  $\text{AgSbF}_6$  (13.74 mg, 0.04 mmol, 0.20 equiv),  $\text{LiOAc}$  (2.64 mg, 0.04 mmol, 0.20 equiv),  $\text{Ag}_2\text{CO}_3$  (55 mg, 0.2 mmol, 1 equiv), 1-bromo-2-(methoxymethyl)benzene (**4j**) (40.2 mg, 0.20 mmol), and 1-bromo-2-(triisopropylsilyl)acetylene (**1**) (110 mg, 95  $\mu\text{L}$ , 0.420 mmol, 2.1 equiv) according to general procedure, at 100  $^\circ\text{C}$  for 20 h, and obtained as a yellow oil (54 mg, 0.14 mmol, 71% yield).  $^1\text{H NMR}$  (500 MHz, Chloroform- $d$ )  $\delta$  7.54 (dd,  $J = 8.0, 1.2$  Hz, 1H), 7.46 (dd,  $J = 7.7, 1.2$  Hz, 1H), 7.10 (t,  $J = 7.9$  Hz, 1H), 4.79 (s, 2H), 3.43 (s, 3H), 1.15 (s, 21H).  $^{13}\text{C NMR}$  (126 MHz, Chloroform- $d$ )  $\delta$  138.5, 133.4, 132.3, 129.4, 126.7, 126.2, 104.4, 96.1, 72.4, 58.5, 18.8 (6C), 11.5 (3C). **HRMS** (ESI+)  $m/z$  calc. for  $\text{C}_{19}\text{H}_{29}\text{BrNaOSi}^+$   $[\text{M}+\text{Na}]^+$ : 403.1063; found: 403.1063.

***(3-Iodo-2-(methoxymethyl)phenyl)ethynyltriisopropylsilane (5k)***

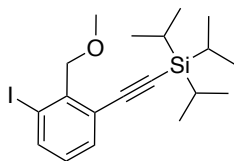

The title compound was prepared by reaction between  $(\text{RhCp}^*\text{Cl}_2)_2$  (3.71 mg, 0.006 mmol, 0.03 equiv),  $\text{AgSbF}_6$  (13.74 mg, 0.04 mmol, 0.20 equiv),  $\text{LiOAc}$  (2.64 mg, 0.04 mmol, 0.20 equiv),  $\text{Ag}_2\text{CO}_3$  (55 mg, 0.2 mmol, 1 equiv), 1-iodo-2-(methoxymethyl)benzene (**4k**) (49.6 mg, 0.20 mmol), and 1-bromo-2-(triisopropylsilyl)acetylene (**1**) (110 mg, 95  $\mu\text{L}$ , 0.420 mmol, 2.1 equiv) according to general procedure, at 100  $^\circ\text{C}$  for 20 h, and obtained as a yellow oil (47 mg, 0.11 mmol, 55% yield).  $^1\text{H NMR}$  (500 MHz, Chloroform- $d$ )  $\delta$  7.82 (dd,  $J = 7.9, 1.2$  Hz, 1H), 7.48 (dd,  $J = 7.7, 1.2$  Hz, 1H), 6.92 (t,  $J = 7.8$  Hz, 1H), 4.77 (s, 2H), 3.43 (s, 3H), 1.15 (s, 21H).  $^{13}\text{C NMR}$  (126 MHz, Chloroform- $d$ )  $\delta$  141.4, 140.2, 133.2, 129.5, 125.8, 104.7, 101.4, 95.9, 76.3, 58.5, 18.8 (6C), 11.5 (3C). **HRMS** (ESI+)  $m/z$  calc. for  $\text{C}_{19}\text{H}_{29}\text{INaOSi}^+$   $[\text{M}+\text{Na}]^+$ : 451.0925; found: 451.0922.

***Triisopropyl((2-(methoxymethyl)-3-(trifluoromethyl)phenyl)ethynyl)silane (5l)***

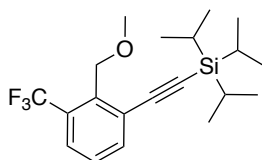

The title compound was prepared by reaction between  $(\text{RhCp}^*\text{Cl}_2)_2$  (3.71 mg, 0.006 mmol, 0.03 equiv),  $\text{AgSbF}_6$  (13.74 mg, 0.04 mmol, 0.20 equiv),  $\text{LiOAc}$  (2.64 mg, 0.04 mmol, 0.20 equiv),  $\text{Ag}_2\text{CO}_3$  (55 mg, 0.2 mmol, 1 equiv), 1-iodo-2-(methoxymethyl)benzene (**4I**) (49.6 mg, 0.20 mmol), and 1-bromo-2-(triisopropylsilyl)acetylene (**1**) (110 mg, 95  $\mu\text{L}$ , 0.420 mmol, 2.1 equiv) according to general procedure, at 100 °C for 20 h, and obtained as a yellow oil (47 mg, 0.11 mmol, 55% yield).  $^1\text{H NMR}$  (500 MHz, Chloroform- $d$ )  $\delta$  7.70 (dd,  $J = 7.8, 1.3$  Hz, 1H), 7.63 (dd,  $J = 7.9, 0.6$  Hz, 1H), 7.37 (td,  $J = 7.8, 0.9$  Hz, 1H), 4.77 (d,  $J = 1.2$  Hz, 2H), 3.45 (s, 3H), 1.16 (s, 21H).  $^{13}\text{C NMR}$  (126 MHz, Chloroform- $d$ )  $\delta$  137.7 (d,  $J = 1.5$  Hz), 136.8, 130.4 (q,  $J = 30.8$  Hz), 128.21, 127.4, 126.2 (q,  $J = 5.7$  Hz), 124.0 (q,  $J = 270$  Hz), 104.0, 96.8, 69.1 (q,  $J = 1.9$  Hz), 59.0, 18.8 (6C), 11.5 (3C).  $^{19}\text{F NMR}$  ( $^{19}\text{F}\{^1\text{H}\}$ , 376 MHz, Chloroform- $d$ )  $\delta$  -59.15. **HRMS** (ESI+)  $m/z$  calc. for  $\text{C}_{20}\text{H}_{29}\text{F}_3\text{NaOSi}^+$   $[\text{M}+\text{Na}]^+$ : 393.1832; found: 393.1820.

***((2-Fluoro-6-(methoxymethyl)phenyl)ethynyl)triisopropylsilane (5m')***

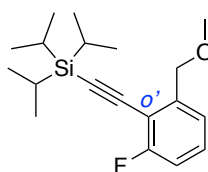

The title compound was prepared by reaction between  $(\text{RhCp}^*\text{Cl}_2)_2$  (3.71 mg, 0.006 mmol, 0.03 equiv),  $\text{AgSbF}_6$  (13.74 mg, 0.04 mmol, 0.20 equiv),  $\text{LiOAc}$  (2.64 mg, 0.04 mmol, 0.20 equiv),  $\text{Ag}_2\text{CO}_3$  (55 mg, 0.2 mmol, 1 equiv), 1-(methoxymethyl)-4-(trifluoromethyl)benzene (**4m**) (38 mg, 0.20 mmol), and 1-bromo-2-(triisopropylsilyl)acetylene (**1**) (110 mg, 95  $\mu\text{L}$ , 0.420 mmol, 2.1 equiv) according to general procedure, at 100 °C for 20 h, and obtained as a yellow oil (15.4 mg, 0.05 mmol, 24% yield). **HRMS** (ESI+)  $m/z$  calc. for  $\text{C}_{19}\text{H}_{29}\text{FNaOSi}^+$   $[\text{M}+\text{Na}]^+$ : 343.1864; found: 343.1856.  $^1\text{H NMR}$  (500 MHz, Chloroform- $d$ )  $\delta$  7.34 – 7.22 (m, 2H), 6.99 (td,  $J = 8.4, 7.9, 1.4$  Hz, 1H), 4.65 (s, 2H), 3.45 (s, 3H), 1.15 (s, 21H).  $^{13}\text{C NMR}$  (126 MHz, Chloroform- $d$ )  $\delta$  163.5 (d,  $J = 251.6$  Hz), 143.0, 129.6 (d,  $J = 8.6$  Hz), 122.6 (d,  $J = 3.4$  Hz), 114.2 (d,  $J = 21.2$  Hz), 110.9 (d,  $J = 16.3$  Hz), 102.0 (d,  $J = 3.6$  Hz), 97.3, 72.4 (d,  $J = 3.2$  Hz), 58.8, 18.8 (6C), 11.4 (3C).  $^{19}\text{F NMR}$  ( $^{19}\text{F}\{^1\text{H}\}$ , 376 MHz, Chloroform- $d$ )  $\delta$  -109.84. **HRMS** (ESI+)  $m/z$  calc. for  $\text{C}_{19}\text{H}_{29}\text{FNaOSi}^+$   $[\text{M}+\text{Na}]^+$ : 343.1864; found: 343.1856.

***((4-Fluoro-2-(methoxymethyl)phenyl)ethynyl)triisopropylsilane (5m)***

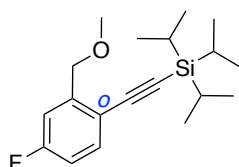

Compound **5m** was obtained as a colorless oil (10.2 mg, 0.03mmol, 16% yield).  $^1\text{H NMR}$  (500 MHz, Chloroform-d)  $\delta$  7.44 (dd,  $J = 8.5, 5.6$  Hz, 1H), 7.19 (dd,  $J = 9.7, 2.7$  Hz, 1H), 6.91 (td,  $J = 8.4, 2.7$  Hz, 1H), 4.64 (s, 2H), 3.45 (s, 3H), 1.14 (s, 21H).  $^{13}\text{C NMR}$  (126 MHz, Chloroform-d)  $\delta$  163.0 (d,  $J = 249.6$  Hz), 143.7, 134.4 (d,  $J = 8.6$  Hz), 117.63, 114.183, 114.177 (d,  $J = 45.1$  Hz), 103.4, 95.4 (d,  $J = 1.5$  Hz), 72.4, 58.8, 18.8 (6C), 11.4 (3C).  $^{19}\text{F NMR}$  ( $^{19}\text{F}\{^1\text{H}\}$ , 376 MHz, Chloroform-d)  $\delta$  -110.32. **HRMS** (ESI+)  $m/z$  calc. for  $\text{C}_{19}\text{H}_{29}\text{FNaOSi}^+$   $[\text{M}+\text{Na}]^+$ : 343.1864; found: 343.1867.

***((4-Fluoro-2-(methoxymethyl)-1,3-phenylene)bis(ethyne-2,1-diyl))bis(triisopropylsilane) (5m'')***

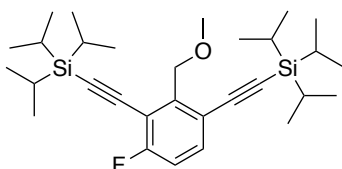

Compound **5m''** was obtained as a colorless oil (10.2 mg, 0.03mmol, 16% yield).  $^1\text{H NMR}$  (400 MHz, Chloroform-d)  $\delta$  7.42 (dd,  $J = 8.6, 5.5$  Hz, 1H), 6.98 (t,  $J = 8.5$  Hz, 1H), 4.78 (s, 2H), 3.41 (s, 3H), 1.15 (s, 21H), 1.14 (s, 21H).  $^{13}\text{C NMR}$  (101 MHz, Chloroform-d)  $\delta$  163.2 (d,  $J = 255.4$  Hz), 143.5, 134.0 (d,  $J = 8.4$  Hz), 121.0 (d,  $J = 3.7$  Hz), 115.4 (d,  $J = 22.3$  Hz), 114.0 (d,  $J = 16.5$  Hz), 103.8, 101.7 (d,  $J = 4.1$  Hz), 97.3, 94.6, 70.9 (d,  $J = 2.4$  Hz), 58.7, 18.81 (6C), 18.77 (6C), 11.5 (3C), 11.4 (3C).  $^{19}\text{F NMR}$  (376 MHz, Chloroform-d)  $\delta$  -106.12. **HRMS** (ESI+)  $m/z$  calc. for  $\text{C}_{30}\text{H}_{49}\text{FNaOSi}_2^+$   $[\text{M}+\text{Na}]^+$ : 523.3198; found: 523.3214.

***((4-Chloro-2-(methoxymethyl)phenyl)ethynyl)triisopropylsilane (5n)***

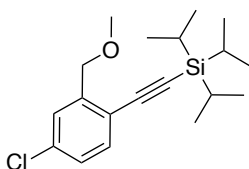

The title compound was prepared by reaction between  $(\text{RhCp}^*\text{Cl}_2)_2$  (3.71 mg, 0.006 mmol, 0.03 equiv),  $\text{AgSbF}_6$  (13.74 mg, 0.04 mmol, 0.20 equiv),  $\text{LiOAc}$  (2.64 mg, 0.04 mmol, 0.20 equiv),  $\text{Ag}_2\text{CO}_3$  (55 mg, 0.2 mmol, 1 equiv), 1-chloro-3-(methoxymethyl)benzene (**4n**) (31.3 mg, 0.20 mmol), and 1-bromo-2-(triisopropylsilyl)acetylene (**1**) (110 mg, 95  $\mu\text{L}$ , 0.420 mmol, 2.1 equiv)

according to general procedure, at 100 °C for 20 h, and obtained as a yellow oil (37 mg, 0.11 mmol, 55% yield). **<sup>1</sup>H NMR** (500 MHz, Chloroform-d) δ 7.47 (d, J = 2.2 Hz, 1H), 7.39 (d, J = 8.2 Hz, 1H), 7.19 (dd, J = 8.2, 2.2 Hz, 1H), 4.62 (s, 2H), 3.45 (s, 3H), 1.14 (s, 21H). **<sup>13</sup>C NMR** (126 MHz, Chloroform-d) δ 142.6, 134.8, 133.7, 127.4, 127.2, 120.2, 103.3, 96.9, 72.3, 58.8, 18.8 (6C), 11.4 (3C). **HRMS** (ESI+) *m/z* calc. for C<sub>19</sub>H<sub>29</sub>ClNaOSi<sup>+</sup> [M+Na]<sup>+</sup>: 359.1568; found: 359.1573.

***Triisopropyl((2-(methoxymethyl)-4-(trifluoromethyl)phenyl)ethynyl)silane (5o)***

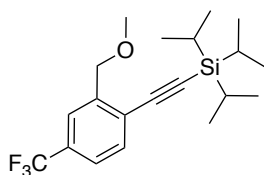

The title compound was prepared by reaction between (RhCp\*Cl<sub>2</sub>)<sub>2</sub> (3.71 mg, 0.006 mmol, 0.03 equiv), AgSbF<sub>6</sub> (13.74 mg, 0.04 mmol, 0.20 equiv), LiOAc (2.64 mg, 0.04 mmol, 0.20 equiv), Ag<sub>2</sub>CO<sub>3</sub> (55 mg, 0.2 mmol, 1 equiv), 1-(methoxymethyl)-4-(trifluoromethyl)benzene (**4o**) (38 mg, 0.20 mmol), and 1-bromo-2-(triisopropylsilyl)acetylene (**1**) (110 mg, 95 μL, 0.420 mmol, 2.1 equiv) according to general procedure, at 100 °C for 20 h, and obtained as a yellow oil (52 mg, 0.14 mmol, 70% yield). **<sup>1</sup>H NMR** (500 MHz, Chloroform-d) δ 7.75 (brs, 1H), 7.56 (d, J = 8.0 Hz, 1H), 7.47 (brd, J = 8.1, 1H), 4.69 (s, 2H), 3.48 (s, 3H), 1.15 (s, 21H). **<sup>13</sup>C NMR** (126 MHz, Chloroform-d) δ 141.7, 132.8 (2C), 130.5 (q, J = 32.5 Hz), 125.30, 124.0 (q, J = 271 Hz), 123.9 (q, J = 3.6 Hz), 103.0, 99.0, 72.4, 58.9, 18.8 (6C), 11.4 (3C). **<sup>19</sup>F NMR** (<sup>19</sup>F{<sup>1</sup>H}, 376 MHz, Chloroform-d) δ -62.90. **HRMS** (ESI+) *m/z* calc. for C<sub>20</sub>H<sub>29</sub>F<sub>3</sub>NaOSi<sup>+</sup> [M+Na]<sup>+</sup>: 393.1832; found: 393.1832.

***Triisopropyl((5-isopropyl-2-(methoxymethyl)phenyl)ethynyl)silane (5p)***

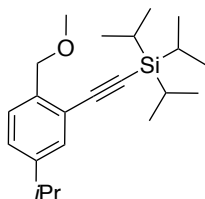

The title compound was prepared by reaction between (RhCp\*Cl<sub>2</sub>)<sub>2</sub> (3.71 mg, 0.006 mmol, 0.03 equiv), AgSbF<sub>6</sub> (13.74 mg, 0.04 mmol, 0.20 equiv), LiOAc (2.64 mg, 0.04 mmol, 0.20 equiv), Ag<sub>2</sub>CO<sub>3</sub> (55 mg, 0.2 mmol, 1 equiv), 1-(tert-butyl)-4-(methoxymethyl)benzene (**4p**) (35.7 mg, 0.20 mmol), and 1-bromo-2-(triisopropylsilyl)acetylene (**1**) (110 mg, 95 μL, 0.420 mmol, 2.1 equiv) according to general procedure, at 100 °C for 20 h, and obtained as a yellow oil (29 mg,

0.08 mmol, 40% yield). **<sup>1</sup>H NMR** (500 MHz, Chloroform-d) δ 7.47 (dd, J = 1.7, 0.9 Hz, 1H), 7.35 – 7.39 (m, 2H), 4.64 (s, 2H), 3.43 (s, 3H), 1.31 (s, 9H), 1.15 (s, 21H). **<sup>13</sup>C NMR** (126 MHz, Chloroform-d) δ 150.3, 137.6, 129.5, 127.4, 126.1, 121.9, 105.2, 94.6, 72.7, 58.6, 34.6, 31.4 (9C), 18.9 (6C), 11.5 (3C). **HRMS** (ESI+) *m/z* calc. for C<sub>23</sub>H<sub>38</sub>NaOSi<sup>+</sup> [M+Na]<sup>+</sup>: 381.2584; found: 381.2597.

**((5-Fluoro-2-(methoxymethyl)phenyl)ethynyl)triisopropylsilane (5q)**

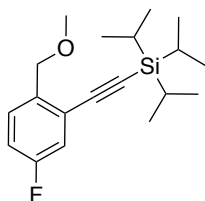

The title compound was prepared by reaction between (RhCp\*Cl<sub>2</sub>)<sub>2</sub> (3.71 mg, 0.006 mmol, 0.03 equiv), AgSbF<sub>6</sub> (13.74 mg, 0.04 mmol, 0.20 equiv), LiOAc (2.64 mg, 0.04 mmol, 0.20 equiv), Ag<sub>2</sub>CO<sub>3</sub> (55 mg, 0.2 mmol, 1 equiv), 1-fluoro-4-(methoxymethyl)benzene (**4p**) (28 mg, 0.20 mmol), and 1-bromo-2-(triisopropylsilyl)acetylene (**1**) (110 mg, 95 μL, 0.420 mmol, 2.1 equiv) according to general procedure, at 100 °C for 20 h, and obtained as a yellow oil (37 mg, 0.12 mmol, 58% yield). **<sup>1</sup>H NMR** (<sup>1</sup>H{<sup>19</sup>F} 400 MHz, Chloroform-d) δ 7.31 (dd, J = 7.7, 1.3 Hz, 1H), 7.23 (t, J = 8.0 Hz, 1H), 7.04 (dd, J = 8.3, 1.3 Hz, 1H), 4.70 (s, 2H), 3.41 (s, 3H), 1.15 (s, 21H). **<sup>13</sup>C NMR** (126 MHz, Chloroform-d) δ 161.9 (d, J = 248.6 Hz), 129.7 (d, J = 9.5 Hz), 128.9 (d, J = 3.3 Hz), 126.7 (d, J = 16.6 Hz), 126.6 (d, J = 5.5 Hz), 116.1 (d, J = 22.7 Hz), 103.8 (d, J = 4.1 Hz), 96.0, 66.4 (d, J = 3.1 Hz), 58.4, 18.8 (6C), 11.5 (3C). **<sup>19</sup>F NMR** (<sup>19</sup>F{<sup>1</sup>H} 376 MHz, Chloroform-d) δ -116.64. **HRMS** (ESI+) *m/z* calc. for C<sub>19</sub>H<sub>29</sub>FNaOSi<sup>+</sup> [M+Na]<sup>+</sup>: 343.1864; found: 343.1859.

**((5-Chloro-2-(methoxymethyl)phenyl)ethynyl)triisopropylsilane (5r)**

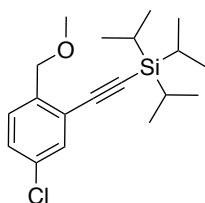

The title compound was prepared by reaction between (RhCp\*Cl<sub>2</sub>)<sub>2</sub> (3.71 mg, 0.006 mmol, 0.03 equiv), AgSbF<sub>6</sub> (13.74 mg, 0.04 mmol, 0.20 equiv), LiOAc (2.64 mg, 0.04 mmol, 0.20 equiv), Ag<sub>2</sub>CO<sub>3</sub> (55 mg, 0.2 mmol, 1 equiv), 1-chloro-4-(methoxymethyl)benzene (**4r**) (31.3 mg, 0.20 mmol), and 1-bromo-2-(triisopropylsilyl)acetylene (**1**) (110 mg, 95 μL, 0.420 mmol, 2.1 equiv)

according to general procedure, at 100 °C for 20 h, and obtained as a yellow oil (32 mg, 0.09 mmol, 48% yield). **<sup>1</sup>H NMR** (500 MHz, Chloroform-d) δ 7.45 (d, J = 2.2 Hz, 1H), 7.39 (d, J = 8.3 Hz, 1H), 7.30 (dd, J = 8.3, 2.2 Hz, 1H), 4.61 (s, 2H), 3.43 (s, 3H), 1.14 (s, 21H). **<sup>13</sup>C NMR** (126 MHz, Chloroform-d) δ 139.1, 132.9, 132.2, 128.9, 128.6, 123.6, 103.0, 97.3, 72.3, 58.7, 18.8 (6C), 11.4 (3C). **HRMS** (ESI+) *m/z* calc. for C<sub>19</sub>H<sub>29</sub>ClNaOSi<sup>+</sup> [M+Na]<sup>+</sup>: 359.1568; found: 359.1569.

**((5-Chloro-2-(methoxymethyl)-1,3-phenylene)bis(ethyne-2,1-diyl))bis(triisopropylsilane)(5r'')**

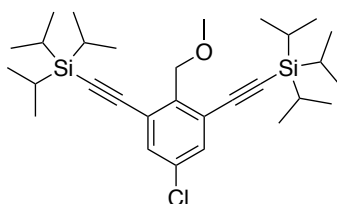

Compound **5r''** was obtained as a colorless oil (35 mg, 0.06 mmol, 34% yield). **<sup>1</sup>H NMR** (500 MHz, Chloroform-d) δ 7.43 (s, 2H), 4.75 (s, 2H), 3.39 (s, 3H), 1.14 (s, 42H). **<sup>13</sup>C NMR** (126 MHz, Chloroform-d) δ 139.6, 133.5, 132.7 (2C), 126.7 (2C), 103.4 (2C), 96.7 (2C), 70.5, 58.6, 18.8 (12 C), 11.5 (6C). **HRMS** (ESI+) *m/z* calc. for C<sub>30</sub>H<sub>49</sub>ClNaOSi<sub>2</sub><sup>+</sup> [M+Na]<sup>+</sup>: 539.2903; found: 539.2904.

**((5-Bromo-2-(methoxymethyl)phenyl)ethynyl)triisopropylsilane (5s)**

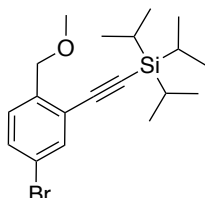

The title compound was prepared by reaction between (RhCp\*Cl<sub>2</sub>)<sub>2</sub> (3.71 mg, 0.006 mmol, 0.03 equiv), AgSbF<sub>6</sub> (13.74 mg, 0.04 mmol, 0.20 equiv), LiOAc (2.64 mg, 0.04 mmol, 0.20 equiv), Ag<sub>2</sub>CO<sub>3</sub> (55 mg, 0.2 mmol, 1 equiv), 1-bromo-4-(methoxymethyl)benzene (**4s**) (40.2 mg, 0.20 mmol), and 1-bromo-2-(triisopropylsilyl)acetylene (**1**) (110 mg, 95 μL, 0.420 mmol, 2.1 equiv) according to general procedure, at 100 °C for 20 h, and obtained as a yellow oil (42 mg, 0.11 mmol, 55% yield). **<sup>1</sup>H NMR** (500 MHz, Chloroform-d) δ 7.60 (d, J = 2.1 Hz, 1H), 7.45 (dd, J = 8.3, 2.1 Hz, 1H), 7.33 (d, J = 8.3 Hz, 1H), 4.60 (s, 2H), 3.43 (s, 3H), 1.14 (s, 21H). **<sup>13</sup>C NMR** (126 MHz, Chloroform-d) δ 139.6, 135.0, 131.8, 128.8, 123.9, 120.7, 102.9, 97.4, 72.3, 58.7, 18.8 (6C), 11.4 (3C). **HRMS** (ESI+) *m/z* calc. for C<sub>19</sub>H<sub>29</sub>BrNaOSi<sup>+</sup> [M+Na]<sup>+</sup>: 403.1063; found: 403.1058.

***((5-Bromo-2-(methoxymethyl)-1,3-phenylene)bis(ethyne-2,1-diyl))bis(triisopropylsilane) (5s'')***

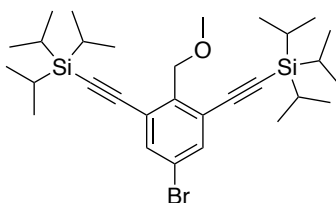

Compound **5s''** was obtained as a colorless oil (30 mg, 0.055 mmol, 28% yield). **<sup>1</sup>H NMR** (500 MHz, Chloroform-d)  $\delta$  7.58 (s, 2H), 4.74 (s, 2H), 3.39 (s, 3H), 1.14 (s, 42H). **<sup>13</sup>C NMR** (126 MHz, Chloroform-d)  $\delta$  140.1, 135.5 (2C), 126.9 (2C), 121.3, 103.2 (2C), 96.8 (2C), 70.6, 58.6, 18.8 (12 C), 11.4 (6C). **HRMS** (ESI+)  $m/z$  calc. for C<sub>30</sub>H<sub>49</sub>BrNaOSi<sub>2</sub><sup>+</sup> [M+Na]<sup>+</sup>: 583.2398; found: 583.2420.

***((5-Iodo-2-(methoxymethyl)phenyl)ethynyl)triisopropylsilane (5t)***

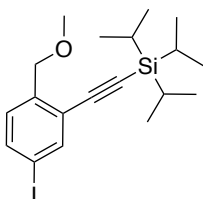

The title compound was prepared by reaction between (RhCp\*Cl<sub>2</sub>)<sub>2</sub> (3.71 mg, 0.006 mmol, 0.03 equiv), AgSbF<sub>6</sub> (13.74 mg, 0.04 mmol, 0.20 equiv), LiOAc (2.64 mg, 0.04 mmol, 0.20 equiv), Ag<sub>2</sub>CO<sub>3</sub> (55 mg, 0.2 mmol, 1 equiv), 1-iodo-4-(methoxymethyl)benzene (**4t**) (49.6 mg, 0.20 mmol), and 1-bromo-2-(triisopropylsilyl)acetylene (**1**) (110 mg, 95  $\mu$ L, 0.420 mmol, 2.1 equiv) according to general procedure, at 100 °C for 20 h, and obtained as a yellow oil (27 mg, 0.06 mmol, 32% yield). **<sup>1</sup>H NMR** (500 MHz, Chloroform-d)  $\delta$  7.79 (d, J = 1.8 Hz, 1H), 7.65 (dd, J = 8.2, 1.8 Hz, 1H), 7.19 (d, J = 8.2 Hz, 1H), 4.59 (s, 2H), 3.43 (s, 3H), 1.14 (s, 21H). **<sup>13</sup>C NMR** (126 MHz, Chloroform-d)  $\delta$  140.8, 140.3, 137.7, 128.9, 124.1, 102.7, 97.5, 91.9, 72.4, 58.7, 18.8, 11.4. **HRMS** (ESI+)  $m/z$  calc. for C<sub>19</sub>H<sub>29</sub>INaOSi<sup>+</sup> [M+Na]<sup>+</sup>: 451.0925; found: 451.0929.

***Triisopropyl((2-(methoxymethyl)-5-(trifluoromethyl)phenyl)ethynyl)silane (5u)***



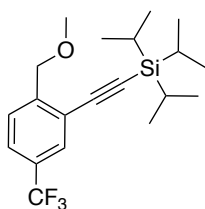

The title compound was prepared by reaction between  $(\text{RhCp}^*\text{Cl}_2)_2$  (3.71 mg, 0.006 mmol, 0.03 equiv),  $\text{AgSbF}_6$  (13.74 mg, 0.04 mmol, 0.20 equiv),  $\text{LiOAc}$  (2.64 mg, 0.04 mmol, 0.20 equiv),  $\text{Ag}_2\text{CO}_3$  (55 mg, 0.2 mmol, 1 equiv), 1-(methoxymethyl)-4-(trifluoromethyl)benzene (**4u**) (38 mg, 0.20 mmol), and 1-bromo-2-(triisopropylsilyl)acetylene (**1**) (110 mg, 95  $\mu\text{L}$ , 0.420 mmol, 2.1 equiv) according to general procedure, at 100 °C for 20 h, and obtained as a yellow oil (33 mg, 0.09 mmol, 45% yield).  **$^1\text{H NMR}$**  (500 MHz, Chloroform-d)  $\delta$  7.70 (dt,  $J = 1.7, 0.8$  Hz, 1H), 7.61 (dt,  $J = 8.2, 0.7$  Hz, 1H), 7.57 (dd,  $J = 8.2, 1.8$  Hz, 1H), 4.69 (s, 2H), 3.47 (s, 3H), 1.15 (s, 21H).  **$^{13}\text{C NMR}$**  (126 MHz, Chloroform-d)  $\delta$  144.6, 129.7 (q,  $J = 33$  Hz), 129.3 (q,  $J = 3.7$  Hz), 127.2, 125.2 (q,  $J = 3.8$  Hz), 123.9 (q,  $J = 272$  Hz), 122.4, 102.7, 98.0, 72.4, 58.9, 18.8 (6C), 11.4 (3C).  **$^{19}\text{F NMR}$**  ( $^{19}\text{F}\{^1\text{H}\}$ , 376 MHz, Chloroform-d)  $\delta$  -62.80. **HRMS** (ESI+)  $m/z$  calc. for  $\text{C}_{20}\text{H}_{29}\text{F}_3\text{NaOSi}^+ [\text{M}+\text{Na}]^+$ : 393.1832; found: 393.1850.

***((2-(Methoxymethyl)-5-(trifluoromethyl)-1,3-phenylene)bis(ethyne-2,1-diyl)bis(triisopropylsilyl)ane (5u'')***

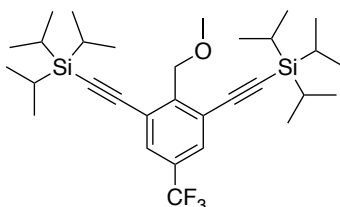

Compound **5u''** was obtained as a colorless oil (17.6 mg, 0.032 mmol, 16% yield).  **$^1\text{H NMR}$**  (500 MHz, Chloroform-d)  $\delta$  7.66 (s, 2H), 4.82 (s, 2H), 3.41 (s, 3H), 1.15 (s, 42H).  **$^{13}\text{C NMR}$**  (126 MHz, Chloroform-d)  $\delta$  144.4, 130.7 (q,  $J = 33.2$  Hz), 129.3 (q,  $J = 3.6$  Hz, 2C), 126.1 (2C), 123.4 (q,  $J = 272.6$  Hz), 103.2 (2C), 97.3 (2C), 70.7, 58.8, 18.8 (12C), 11.4 (6C).  **$^{19}\text{F NMR}$**  ( $^{19}\text{F}\{^1\text{H}\}$ , 376 MHz, Chloroform-d)  $\delta$  -63.22. **HRMS** (ESI+)  $m/z$  calc. for  $\text{C}_{31}\text{H}_{49}\text{F}_3\text{NaOSi}_2^+ [\text{M}+\text{Na}]^+$ : 573.3166; found: 573.3187.

***Triisopropyl((3-(methoxymethyl)naphthalen-2-yl)ethynyl)silane (5v)***

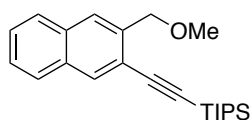

General procedure starting from 2-(methoxymethyl)naphthalene (**4v**) (34.4 mg, 0.2 mmol) at 100 °C. Yellow liquid (75 mg, 70 % yield).  $^1\text{H NMR}$  (300 MHz, Chloroform-*d*)  $\delta$  8.03 (s, 1H), 7.90 (s, 1H), 7.85 – 7.75 (m, 2H), 7.52 – 7.43 (m, 2H), 4.82 (s, 2H), 3.55 (s, 3H), 1.20 (m, 21H).  $^{13}\text{C NMR}$  (75 MHz,  $\text{CDCl}_3$ )  $\delta$  136.47, 132.97, 132.68, 132.12, 127.80, 127.34, 126.81, 126.24, 125.66, 119.74, 104.57, 95.17, 72.98, 58.72, 18.71, 11.36. **HRMS** (ESI+) *m/z* calc. for  $\text{C}_{23}\text{H}_{32}\text{NaOSi}$   $[\text{M}+\text{Na}]^+$ : 375.2115. Found: 375.2116.

**Triisopropyl((3-(methoxymethyl)thiophen-2-yl)ethynyl)silane (5w)**

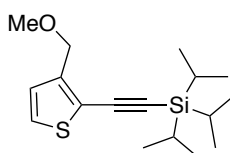

The title compound was prepared by reaction between  $(\text{RhCp}^*\text{Cl}_2)_2$  (3.71 mg, 0.006 mmol, 0.03 equiv),  $\text{AgSbF}_6$  (13.74 mg, 0.04 mmol, 0.20 equiv),  $\text{LiOAc}$  (2.64 mg, 0.04 mmol, 0.20 equiv),  $\text{Ag}_2\text{CO}_3$  (55 mg, 0.2 mmol, 1 equiv), 3-(methoxymethyl)thiophene (**4w**) (25,6 mg, 0.20 mmol), and 1-bromo-2-(triisopropylsilyl)acetylene (**1**) (110 mg, 95  $\mu\text{L}$ , 0.420 mmol, 2.1 equiv) according to general procedure, at 45 °C for 20 h, and obtained as a yellow oil (19 mg, 0.06 mmol, 31% yield).  $^1\text{H NMR}$  (300 MHz, Chloroform-*d*)  $\delta$  7.18 (d,  $J = 5.2$  Hz, 1H), 7.03 (d,  $J = 5.2$  Hz, 1H), 4.53 (s, 2H), 3.36 (s, 3H), 1.13 (s, 21H).  $^{13}\text{C NMR}$  (126 MHz, Chloroform-*d*)  $\delta$  143.8, 127.8, 126.4, 121.7, 98.7, 98.1, 68.4, 58.2, 18.8 (6C), 11.4 (3C). **HRMS** (ESI+) *m/z* calc. for  $\text{C}_{17}\text{H}_{28}\text{NaOSSi}$   $[\text{M}+\text{Na}]^+$ : 331.1522. Found: 331.1524.

**2,2-Dimethyl-1-(2-((triisopropylsilyl)ethynyl)phenyl)propan-1-one (7a)**

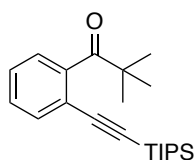

General procedure starting from 2,2-dimethyl-1-phenylpropan-1-one (**6a**) (32.4 mg, 0.2 mmol) at 45 °C. Colorless liquid (65 mg, 95 % yield).  $^1\text{H NMR}$  (300 MHz, Chloroform-*d*)  $\delta$  7.55 – 7.48 (m, 1H), 7.33 – 7.25 (m, 2H), 7.13 (m, 1H), 1.27 (s, 9H), 1.10 (m, 21H).  $^{13}\text{C NMR}$  (75 MHz,

CDCl<sub>3</sub>)  $\delta$  212.30, 144.13, 133.50, 128.10, 127.51, 124.43, 120.04, 104.76, 94.92, 45.08, 26.89, 18.59, 11.28. **HRMS** (ESI+)  $m/z$  calc. for C<sub>22</sub>H<sub>34</sub>NaO<sub>2</sub>Si [M+Na]<sup>+</sup>: 365.2271. Found: 365.2272.

**2,2,2-Trifluoro-1-(2-((triisopropylsilyl)ethynyl)phenyl)ethan-1-one (7b)**

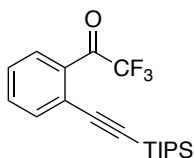

General procedure at 90 °C starting from 2,2,2-trifluoro-1-phenylethan-1-one (**6b**) (34.8 mg, 0.2 mmol) at 90 °C. Yellow liquid (35.0 mg, 0.10 mmol, 50 % yield). **<sup>1</sup>H NMR** (400 MHz, Chloroform-*d*)  $\delta$  7.78 (dt,  $J$  = 8.0, 1.3 Hz, 1H), 7.71 – 7.66 (m, 1H), 7.56 (td,  $J$  = 7.7, 1.3 Hz, 1H), 7.43 (td,  $J$  = 7.7, 1.3 Hz, 1H), 1.15 (m, 21H). **<sup>13</sup>C NMR** (101 MHz, CDCl<sub>3</sub>)  $\delta$  180.86 (q,  $J$  = 33 Hz), 135.51, 133.02, 132.59, 129.11 (q,  $J$  = 3 Hz), 127.86, 124.42, 116.19 (q,  $J$  = 289 Hz), 103.50, 98.86, 18.57, 11.28. **<sup>19</sup>F NMR** (376 MHz, CDCl<sub>3</sub>)  $\delta$  -71.90. **HRMS** (ESI+)  $m/z$  calc. for C<sub>22</sub>H<sub>29</sub>F<sub>3</sub>NaO<sub>2</sub>Si [M+Na+OMe]<sup>+</sup>: 409.1781. Found: 409.1790.

**2-((Triisopropylsilyl)ethynyl)benzoyl ferrocene (7c)**

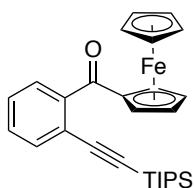

General procedure starting from (**6c**) (67.0 mg, 0.237 mmol) at 45 °C. Brown liquid (90 mg, 83 % yield). **<sup>1</sup>H NMR** (300 MHz, Chloroform-*d*)  $\delta$  7.54 (m, 2H), 7.39 (m, 2H), 4.77 (t,  $J$  = 1.9 Hz, 2H), 4.51 (t,  $J$  = 1.9 Hz, 2H), 4.21 (s, 5H), 1.00 (m, 21H). **<sup>13</sup>C NMR** (75 MHz, CDCl<sub>3</sub>)  $\delta$  200.00, 143.20, 133.53, 129.29, 127.84, 126.98, 120.90, 104.53, 96.66, 78.52, 72.56, 71.34, 69.93, 18.56, 11.12. **HRMS** (ESI+)  $m/z$  calc. for C<sub>28</sub>H<sub>34</sub>NaOSiFe [M+Na]<sup>+</sup>: 491.1667. Found: 491.1670.

**1-(2-Methyl-6-((triisopropylsilyl)ethynyl)phenyl)ethan-1-one (7d)**

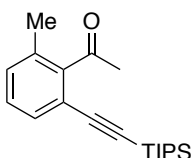

General procedure starting from 1-(*o*-tolyl)ethan-1-one (**6d**) (26.8 mg, 0.2 mmol) at 45 °C. Yellow liquid (55 mg, 87 % yield). **<sup>1</sup>H NMR** (300 MHz, Chloroform-*d*)  $\delta$  7.36 – 7.30 (m, 1H), 7.23 – 7.11 (m, 2H), 2.59 (s, 3H), 2.24 (s, 3H), 1.11 (m, 21H). **<sup>13</sup>C NMR** (75 MHz, CDCl<sub>3</sub>)  $\delta$  205.69,

144.77, 133.10, 130.55, 130.37, 128.41, 119.08, 104.22, 95.85, 31.72, 19.04, 18.54, 11.23.

**HRMS** (ESI+)  $m/z$  calc. for  $C_{20}H_{30}NaOSi$   $[M+Na]^+$ : 337.1958. Found: 337.1954.

**1-(2-Chloro-6-((triisopropylsilyl)ethynyl)phenyl)ethan-1-one (7e)**

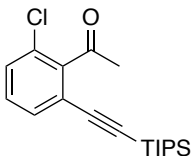

General procedure starting from 1-(2-chlorophenyl)ethan-1-one (**6e**) (35.0 mg, 0.226 mmol) at 45 °C. Light yellow liquid (70 mg, 92 % yield). **<sup>1</sup>H NMR** (300 MHz, Chloroform-*d*)  $\delta$  7.39 (dd,  $J = 7.5, 1.3$  Hz, 1H), 7.32 (dd,  $J = 8.1, 1.3$  Hz, 1H), 7.23 (dd,  $J = 8.1, 7.6$  Hz, 1H), 2.58 (s, 3H), 1.10 (m, 21H). **<sup>13</sup>C NMR** (75 MHz,  $CDCl_3$ )  $\delta$  201.36, 143.78, 131.09, 129.49, 129.44, 128.74, 121.02, 102.37, 97.32, 31.06, 18.49, 11.17. **HRMS** (ESI+)  $m/z$  calc. for  $C_{17}H_{27}NaClOSi$   $[M+Na]^+$ : 357.1412. Found: 357.1414.

**1-(2-Bromo-6-((triisopropylsilyl)ethynyl)phenyl)ethan-1-one (7f)**

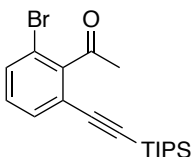

General procedure starting from 1-(2-bromophenyl)ethan-1-one (**6f**) (40.0 mg, 0.2 mmol) at 45 °C. Colorless liquid (75 mg, 95 % yield). **<sup>1</sup>H NMR** (300 MHz, Chloroform-*d*)  $\delta$  7.49 (dd,  $J = 8.1, 1.0$  Hz, 1H), 7.43 (dd,  $J = 7.8, 1.0$  Hz, 1H), 7.16 (t,  $J = 7.9$  Hz, 1H), 2.58 (s, 3H), 1.09 (m, 21H). **<sup>13</sup>C NMR** (101 MHz,  $CDCl_3$ )  $\delta$  202.08, 145.77, 132.56, 131.61, 129.58, 121.02, 116.64, 102.41, 97.49, 30.76, 18.52, 11.19. **HRMS** (ESI+)  $m/z$  calc. for  $C_{19}H_{28}BrOSi$   $[M+H]^+$ : 379.1087. Found: 379.1087.

**1-(2-Iodo-6-((triisopropylsilyl)ethynyl)phenyl)ethan-1-one (7g)**

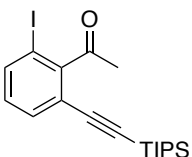

General procedure starting from 1-(2-iodophenyl)ethan-1-one (**6g**) (53.0 mg, 0.215 mmol) at 45 °C. Yellow liquid (88 mg, 95 % yield). **<sup>1</sup>H NMR** (300 MHz, Chloroform-*d*)  $\delta$  7.75 (dd,  $J = 7.9, 1.0$  Hz, 1H), 7.46 (dd,  $J = 7.9, 1.0$  Hz, 1H), 7.00 (t,  $J = 7.9$  Hz, 1H), 2.59 (s, 3H), 1.09 (m, 21H). **<sup>13</sup>C NMR** (75 MHz,  $CDCl_3$ )  $\delta$  203.72, 149.55, 138.89, 132.30, 129.63, 120.29, 102.65, 97.51,

88.61, 30.20, 18.50, 11.17. **HRMS** (ESI+)  $m/z$  calc. for  $C_{19}H_{27}NaIOSi$   $[M+Na]^+$ : 449.0768. Found: 449.0773.

**1-(2-Methoxy-6-((triisopropylsilyl)ethynyl)phenyl)ethan-1-one (7h)**

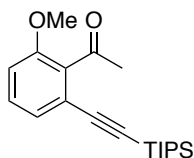

General procedure starting from 1-(2-methoxyphenyl)ethan-1-one (**6h**) (35.0 mg, 0.233 mmol) at 45 °C. Light yellow liquid (70 mg, 91 % yield). **<sup>1</sup>H NMR** (300 MHz, Chloroform-*d*)  $\delta$  7.23 (dd,  $J = 8.4, 7.7$  Hz, 1H), 7.08 (dd,  $J = 7.7, 0.9$  Hz, 1H), 6.87 (dd,  $J = 8.4, 0.9$  Hz, 1H), 3.79 (s, 3H), 2.52 (s, 3H), 1.10 (s, 21H). **<sup>13</sup>C NMR** (75 MHz,  $CDCl_3$ )  $\delta$  202.64, 155.23, 134.46, 129.61, 125.03, 120.42, 111.29, 103.41, 95.35, 55.72, 31.54, 18.50, 11.18. **HRMS** (ESI+)  $m/z$  calc. for  $C_{20}H_{30}NaO_2Si$   $[M+Na]^+$ : 353.1907. Found: 353.1902.

**1-(2-(Trifluoromethyl)-6-((triisopropylsilyl)ethynyl)phenyl)ethan-1-one (7i)**

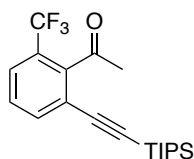

General procedure starting from 1-(2-(trifluoromethyl)phenyl)ethan-1-one (**6i**) (37.6 mg, 0.2 mmol) at 45 °C. Light yellow liquid (60 mg, 81 % yield). **<sup>1</sup>H NMR** (500 MHz, Chloroform-*d*)  $\delta$  7.67 (d,  $J = 7.8$  Hz, 1H), 7.60 (d,  $J = 8.0$  Hz, 1H), 7.44 (tq,  $J = 7.9, 0.9$  Hz, 1H), 2.62 (s, 3H), 1.13 – 1.08 (m, 21H). **<sup>13</sup>C NMR** (101 MHz,  $CDCl_3$ )  $\delta$  201.94, 143.54 (q,  $J = 2$  Hz), 136.20, 128.69, 126.42 (q,  $J = 32$  Hz), 125.87 (q,  $J = 5$  Hz), 123.22 (q,  $J = 275$  Hz), 120.81, 102.13, 98.62, 31.41, 18.52, 11.21. **<sup>19</sup>F NMR** (376 MHz,  $CDCl_3$ )  $\delta$  -58.84. **HRMS** (ESI+)  $m/z$  calc. for  $C_{20}H_{27}NaF_3OSi$   $[M+Na]^+$ : 391.1675. Found: 391.1690.

**1-(2,4-Difluoro-6-((triisopropylsilyl)ethynyl)phenyl)ethan-1-one (7j)**

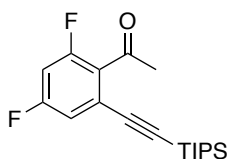

General procedure starting from 1-(2,4-difluorophenyl)ethan-1-one (**6j**) (31.2 mg, 0.2 mmol) at 45 °C. Yellow liquid (64 mg, 95 % yield). **<sup>1</sup>H NMR** (300 MHz, Chloroform-*d*)  $\delta$  7.03 (ddd,  $J =$

8.6, 2.4, 1.3 Hz, 1H), 6.82 (ddd,  $J = 9.7, 8.6, 2.4$  Hz, 1H), 2.59 (d,  $J = 1.6$  Hz, 3H), 1.11 (m, 21H).  $^{13}\text{C}$  NMR (75 MHz,  $\text{CDCl}_3$ )  $\delta$  197.41, 162.69 (dd,  $J = 245$  Hz,  $J = 15$  Hz), 159.36 (dd,  $J = 245$  Hz,  $J = 15$  Hz), 128.45 (dd,  $J = 18$  Hz,  $J = 4$  Hz), 123.68 (dd,  $J = 18$  Hz,  $J = 4$  Hz), 116.40 (dd,  $J = 23$  Hz,  $J = 4$  Hz), 104.87 (t, 25 Hz), 101.79 (dd,  $J = 3$  Hz,  $J = 1$  Hz), 99.04, 31.73, 18.52, 11.18.  $^{19}\text{F}$  NMR (376 MHz,  $\text{CDCl}_3$ )  $\delta$  -107.20, -111.35. HRMS (ESI+)  $m/z$  calc. for  $\text{C}_{19}\text{H}_{26}\text{NaF}_2\text{OSi}$   $[\text{M}+\text{Na}]^+$ : 359.1613. Found: 359.1604.

**1-(2,6-bis((Triisopropylsilyl)ethynyl)phenyl)ethan-1-one (7k)**

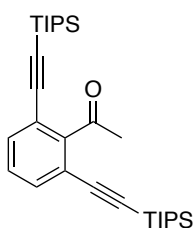

General procedure at room temperature starting from acetophenone (**6k**) (24.0 mg, 0.2 mmol), using 1-Bromo-2-(triisopropylsilyl)acetylene (**1**) (110 mg, 0.42 mmol). Colorless oil (90 mg, 0.2 mmol, 94 % yield).  $^1\text{H}$  NMR (300 MHz, Chloroform- $d$ )  $\delta$  7.43 (d,  $J = 7.7$  Hz, 2H), 7.24 (t,  $J = 7.7$ , 1H), 2.60 (s, 3H), 1.10 (m, 42H).  $^{13}\text{C}$  NMR (75 MHz,  $\text{CDCl}_3$ )  $\delta$  203.11, 148.08, 132.48, 128.32, 119.30, 102.98, 96.28, 31.11, 18.55, 11.22. HRMS (ESI+)  $m/z$  calc. for  $\text{C}_{30}\text{H}_{48}\text{NaO}_2\text{Si}_2$   $[\text{M}+\text{Na}]^+$ : 503.3136. Found: 503.3137.

**Ethyl 4-acetyl-3,5-bis((triisopropylsilyl)ethynyl)benzoate (7l)**

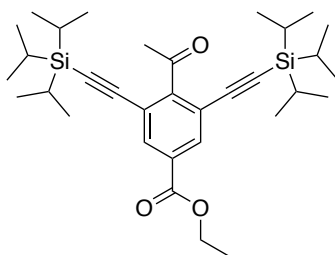

The title compound was prepared by reaction between  $(\text{RhCp}^*\text{Cl}_2)_2$  (3.09 mg, 0.005 mmol, 0.025 equiv),  $\text{AgSbF}_6$  (13.74 mg, 0.04 mmol, 0.20 equiv),  $\text{LiOAc}$  (2.64 mg, 0.04 mmol, 0.20 equiv),  $\text{Ag}_2\text{CO}_3$  (55 mg, 0.2 mmol, 1 equiv), ethyl 4-acetylbenzoate (**6l**) (38.4 mg, 0.20 mmol), and 1-bromo-2-(triisopropylsilyl)acetylene (**1**) (105 mg, 90  $\mu\text{L}$ , 0.40 mmol, 2 equiv) according to general procedure, at 45  $^\circ\text{C}$  for 20 h, and obtained as a white crystalline solid (88 mg, 0.16 mmol, 80% yield).  $^1\text{H}$  NMR (500 MHz, Chloroform- $d$ )  $\delta$  8.04 (s, 2H), 4.40 (q,  $J = 7.1$  Hz, 2H), 2.59 (s, 3H), 1.40 (t,  $J = 7.1$  Hz, 3H), 1.10 (s, 42H).  $^{13}\text{C}$  NMR (126 MHz, Chloroform- $d$ )  $\delta$  202.5, 164.9, 151.5, 133.3 (2C), 131.0, 120.0 (2C), 102.2 (2C), 97.7 (2C), 61.8, 31.0, 18.7 (12C), 14.4, 11.4

(6C). **HRMS** (ESI+)  $m/z$  calc. for  $C_{33}H_{53}O_3Si_2^+$   $[M+H]^+$ : 553.3528; found: 553.3525. **Mp**: 43-48 °C.

**1-(2-((Triisopropylsilyl)ethynyl)naphthalen-1-yl)ethan-1-one (7m)**

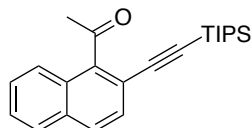

General procedure starting from 1-(naphthalen-1-yl)ethan-1-one (**6m**) (34.2 mg, 0.2 mmol) at 45 °C. Brown liquid (65 mg, 93 % yield). **<sup>1</sup>H NMR** (500 MHz, Chloroform-*d*)  $\delta$  7.84 – 7.80 (m, 1H), 7.79 (d,  $J$  = 8.4 Hz, 1H), 7.73 – 7.69 (m, 1H), 7.54 – 7.49 (m, 3H), 2.78 (s, 3H), 1.16 (m, 21H). **<sup>13</sup>C NMR** (75 MHz, CDCl<sub>3</sub>)  $\delta$  205.44, 143.28, 132.84, 128.84, 128.70, 128.35, 128.24, 127.48, 126.97, 124.58, 116.65, 104.50, 97.62, 32.31, 18.60, 11.28. **HRMS** (ESI+)  $m/z$  calc. for  $C_{23}H_{30}NaOSi$   $[M+Na]^+$ : 373.1958. Found: 373.1960.

**1-(1-Methyl-3-((triisopropylsilyl)ethynyl)-1H-pyrrol-2-yl)ethan-1-one (7n)**

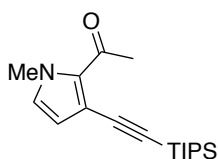

General procedure starting from 1-(1-methyl-1H-pyrrol-2-yl)ethan-1-one (**6n**) (24.63 mg, 0.2 mmol) at 45 °C. Light yellow liquid (45 mg, 74 % yield). **<sup>1</sup>H NMR** (300 MHz, Chloroform-*d*)  $\delta$  6.65 (d,  $J$  = 2.6 Hz, 1H), 6.30 (d,  $J$  = 2.6 Hz, 1H), 3.88 (s, 3H), 2.71 (s, 3H), 1.11 (s, 21H). **<sup>13</sup>C NMR** (101 MHz, CDCl<sub>3</sub>)  $\delta$  189.40, 132.37, 129.25, 113.98, 113.63, 102.32, 96.56, 38.66, 29.93, 18.63, 11.34. **HRMS** (ESI+)  $m/z$  calc. for  $C_{18}H_{29}NNaOSi$   $[M+Na]^+$ : 326.1911. Found: 326.1908.

**1-(3-((Triisopropylsilyl)ethynyl)furan-2-yl)ethan-1-one (7o)**

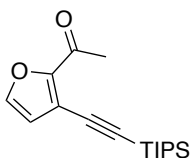

General procedure starting from 1-(furan-2-yl)ethan-1-one (**6o**) (22.22 mg, 0.2 mmol) at 45 °C. Light yellow liquid (50 mg, 86 % yield). **<sup>1</sup>H NMR** (300 MHz, Chloroform-*d*)  $\delta$  7.50 (d,  $J$  = 1.8 Hz, 1H), 6.56 (d,  $J$  = 1.8 Hz, 1H), 2.62 (s, 3H), 1.12 (m, 21H). **<sup>13</sup>C NMR** (101 MHz, CDCl<sub>3</sub>)  $\delta$  185.63, 152.94, 145.35, 116.15, 114.71, 101.64, 97.52, 27.64, 18.54, 11.18. **HRMS** (ESI+)  $m/z$  calc. for  $C_{17}H_{26}NaO_2Si$   $[M+Na]^+$ : 313.1594. Found: 313.1596.

**1-(3-((Triisopropylsilyl)ethynyl)thiophen-2-yl)ethan-1-one (7p)**

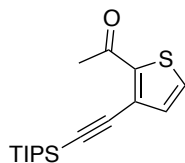

General procedure starting from 1-(thiophen-2-yl)ethan-1-one (**6p**) (25.2 mg, 0.2 mmol) at 45 °C. Light yellow liquid (58 mg, 95 % yield). <sup>1</sup>H NMR (300 MHz, Chloroform-*d*) δ 7.49 (d, *J* = 5.1 Hz, 1H), 7.16 (d, *J* = 5.1 Hz, 1H), 2.78 (s, 3H), 1.13 (m, 21H). <sup>13</sup>C NMR (75 MHz, CDCl<sub>3</sub>) δ 191.05, 146.12, 133.71, 131.61, 125.60, 101.17, 100.17, 28.88, 18.58, 11.23. HRMS (ESI+) *m/z* calc. for C<sub>17</sub>H<sub>27</sub>OSSi [M+H]<sup>+</sup>: 307.1546. Found: 307.1545.

**1,5-Dichloro-4,8-bis((triisopropylsilyl)ethynyl)anthracene-9,10-dione (7q)**

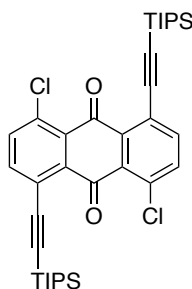

General procedure starting from 1,5-dichloroanthracene-9,10-dione (**6q**) (54.4 mg, 0.20 mmol) using [Cp\*RhCl<sub>2</sub>]<sub>2</sub> (4.96 mg, 8.00 μmol, 4 mol %), and 1-Bromo-2-(triisopropylsilyl)acetylene (120 mg, 0.46 mmol) at 100 °C. Yellow liquid (105 mg, 82 % yield). <sup>1</sup>H NMR (300 MHz, Chloroform-*d*) δ 7.69 (d, *J* = 8.4 Hz, 2H), 7.59 (d, *J* = 8.4 Hz, 2H), 1.19 (m, 42H). <sup>13</sup>C NMR (75 MHz, CDCl<sub>3</sub>) δ 180.85, 138.95, 137.80, 135.07, 132.70, 131.83, 121.32, 102.93, 99.71, 18.64, 11.35. HRMS (ESI+) *m/z* calc. for C<sub>36</sub>H<sub>46</sub>NaCl<sub>2</sub>O<sub>2</sub>Si<sub>2</sub> [M+Na]<sup>+</sup>: 659.2306. Found: 659.2334.

**Isopropyl 2-(4-(4-chloro-2-((triisopropylsilyl)ethynyl)benzoyl)-3-((triisopropylsilyl)ethynyl)phenoxy)-2-methylpropanoate (7r)**

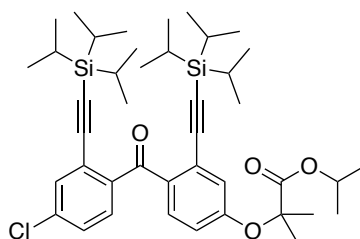



The title compound was prepared by reaction between (RhCp\*Cl<sub>2</sub>)<sub>2</sub> (3.09 mg, 0.005 mmol, 0.025 equiv), AgSbF<sub>6</sub> (13.74 mg, 0.04 mmol, 0.20 equiv), LiOAc (2.64 mg, 0.04 mmol, 0.20 equiv), Ag<sub>2</sub>CO<sub>3</sub> (55 mg, 0.2 mmol, 1 equiv), Fenofibrate (**6r**) (72.2 mg, 0.20 mmol), and 1-bromo-2-(triisopropylsilyl)acetylene (**1**) (105 mg, 90 μL, 0.40 mmol, 2 equiv) according to general procedure, at 50°C for 20 h, and obtained as a colorless oil (52 mg, 0.07 mmol, 36% yield). <sup>1</sup>H NMR (500 MHz, Chloroform-d) δ 7.52 (d, J = 8.7 Hz, 1H), 7.47 (d, J = 2.1 Hz, 1H), 7.38 (d, J = 8.3 Hz, 1H), 7.29 (dd, J = 8.3, 2.1 Hz, 1H), 6.96 (d, J = 2.6 Hz, 1H), 6.74 (dd, J = 8.8, 2.6 Hz, 1H), 5.07 (h, J = 6.3 Hz, 1H), 1.63 (s, 6H), 1.21 (d, J = 6.3 Hz, 6H), 1.09 – 0.90 (m, 42H). <sup>13</sup>C NMR (126 MHz, Chloroform-d) δ 193.8, 173.0, 158.5, 140.4, 136.5, 133.8, 132.75, 132.72, 131.0, 128.5, 125.2, 124.2, 124.1, 117.5, 104.8, 103.4, 98.5, 98.5, 79.6, 69.5, 25.5 (2C), 21.7 (3C), 18.7 (6C), 18.7 (6C), 11.5 (2C), 11.3 (3C). HRMS (ESI+) *m/z* calc. for C<sub>42</sub>H<sub>61</sub>ClNaO<sub>4</sub>Si<sub>2</sub><sup>+</sup> [M+Na]<sup>+</sup>: 743.3689; found: 743.3711.

***Ethyl (Z)-3-cyclopropyl-5-(triisopropylsilyl)pent-2-en-4-ynoate (9a)***

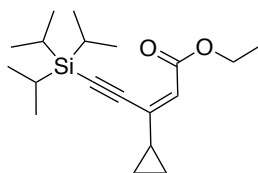

The title compound was prepared by reaction between (RhCp\*Cl<sub>2</sub>)<sub>2</sub> (3.09 mg, 0.005 mmol, 0.025 equiv), AgSbF<sub>6</sub> (13.74 mg, 0.04 mmol, 0.20 equiv), LiOAc (2.64 mg, 0.04 mmol, 0.20 equiv), Ag<sub>2</sub>CO<sub>3</sub> (55 mg, 0.2 mmol, 1 equiv), ethyl (*E*)-3-cyclopropylacrylate (**8a**) (28.0 mg, 31.2 μL 0.20 mmol), and 1-bromo-2-(triisopropylsilyl)acetylene (**1**) (105 mg, 90 μL, 0.40 mmol, 2 equiv) according to general procedure, at 85 °C for 48 h, and obtained as a colorless oil (33 mg, 0.10 mmol, 52% yield). <sup>1</sup>H NMR (400 MHz, Chloroform-*d*) δ 6.12 (s, 1H), 4.19 (q, *J* = 7.1 Hz, 2H), 1.65 (tt, *J* = 8.0, 4.7 Hz, 1H), 1.26 (t, *J* = 7.1 Hz, 3H), 1.11 (s, 21H), 1.01 – 0.92 (m, 2H), 0.85 – 0.73 (m, 2H). <sup>13</sup>C NMR (101 MHz, Chloroform-*d*) δ 164.7, 141.9, 122.9, 103.9, 99.9, 60.0, 18.7 (6C), 18.3, 14.5, 11.4 (3C), 7.7 (2C). HRMS (ESI+) *m/z* calc. for C<sub>19</sub>H<sub>33</sub>O<sub>2</sub>Si<sup>+</sup> [M+H]<sup>+</sup>: 321.2244; found: 321.2246.

***Ethyl (Z)-3-phenyl-5-(triisopropylsilyl)pent-2-en-4-ynoate (9b)***

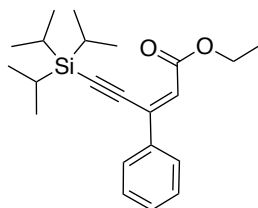

The title compound was prepared by reaction between  $(\text{RhCp}^*\text{Cl}_2)_2$  (3.09 mg, 0.005 mmol, 0.025 equiv),  $\text{AgSbF}_6$  (13.74 mg, 0.04 mmol, 0.20 equiv),  $\text{LiOAc}$  (2.64 mg, 0.04 mmol, 0.20 equiv),  $\text{Ag}_2\text{CO}_3$  (55 mg, 0.2 mmol, 1 equiv), ethyl cinnamate (**8b**) (35.2 mg, 0.20 mmol), and 1-bromo-2-(triisopropylsilyl)acetylene (**1**) (105 mg, 90  $\mu\text{L}$ , 0.40 mmol, 2 equiv) according to general procedure, at 85 °C for 48 h, and obtained as a yellow oil (43 mg, 0.12 mmol, 60% yield). **<sup>1</sup>H NMR** (400 MHz, Chloroform-*d*)  $\delta$  7.79 – 7.70 (m, 2H), 7.43 – 7.34 (m, 3H), 6.55 (s, 1H), 4.28 (q,  $J = 7.1$  Hz, 2H), 1.33 (t,  $J = 7.1$  Hz, 3H), 1.17 (s, 21H). **<sup>13</sup>C NMR** (101 MHz, Chloroform-*d*)  $\delta$  165.2, 137.5, 135.7, 129.8, 128.6 (2C), 127.3 (2C), 124.0, 106.0, 103.1, 60.5, 18.8 (6C), 14.5, 11.5 (3C). **HRMS** (ESI+)  $m/z$  calc. for  $\text{C}_{22}\text{H}_{32}\text{NaO}_2\text{Si}^+$   $[\text{M}+\text{Na}]^+$ : 379.2064; found: 379.2073.

***Ethyl (Z)-3-(4-ethoxyphenyl)-5-(triisopropylsilyl)pent-2-en-4-ynoate (9c)***

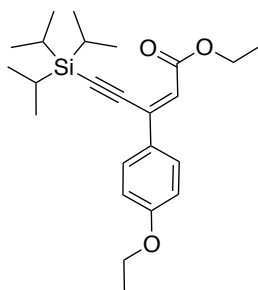

The title compound was prepared by reaction between  $(\text{RhCp}^*\text{Cl}_2)_2$  (3.09 mg, 0.005 mmol, 0.025 equiv),  $\text{AgSbF}_6$  (13.74 mg, 0.04 mmol, 0.20 equiv),  $\text{LiOAc}$  (2.64 mg, 0.04 mmol, 0.20 equiv),  $\text{Ag}_2\text{CO}_3$  (55 mg, 0.2 mmol, 1 equiv), ethyl (*E*)-3-(4-ethoxyphenyl)acrylate (**8c**) (44.1 mg, 0.20 mmol), and 1-bromo-2-(triisopropylsilyl)acetylene (**1**) (105 mg, 90  $\mu\text{L}$ , 0.40 mmol, 2 equiv) according to general procedure, at 85 °C for 48 h, and obtained as a colorless oil (35 mg, 0.09 mmol, 44% yield). **<sup>1</sup>H NMR** (400 MHz, Chloroform-*d*)  $\delta$  7.74 – 7.65 (m, 2H), 6.92 – 6.84 (m, 2H), 6.47 (s, 1H), 4.26 (q,  $J = 7.1$  Hz, 2H), 4.06 (q,  $J = 7.0$  Hz, 2H), 1.42 (t,  $J = 7.0$  Hz, 3H), 1.31 (t,  $J = 7.1$  Hz, 3H), 1.17 (s, 21H). **<sup>13</sup>C NMR** (101 MHz, Chloroform-*d*)  $\delta$  165.4, 160.5, 135.2, 129.6, 128.8 (2C), 121.7, 114.5 (2C), 105.5, 103.2, 63.7, 60.3, 18.8 (6C), 14.9, 14.5, 11.5 (3C). **HRMS** (ESI+)  $m/z$  calc. for  $\text{C}_{24}\text{H}_{36}\text{NaO}_3\text{Si}^+$   $[\text{M}+\text{Na}]^+$ : 423.2326; found: 423.2331.

***Ethyl (Z)-3-(4-bromophenyl)-5-(triisopropylsilyl)pent-2-en-4-ynoate (9d)***

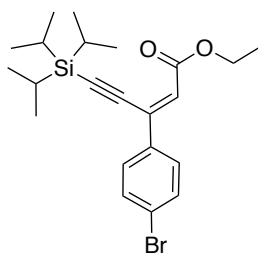

The title compound was prepared by reaction between (RhCp\*Cl<sub>2</sub>)<sub>2</sub> (3.09 mg, 0.005 mmol, 0.025 equiv), AgSbF<sub>6</sub> (13.74 mg, 0.04 mmol, 0.20 equiv), LiOAc (2.64 mg, 0.04 mmol, 0.20 equiv), Ag<sub>2</sub>CO<sub>3</sub> (55 mg, 0.2 mmol, 1 equiv), ethyl (*E*)-3-(4-bromophenyl)acrylate (**8d**) (51.0 mg, 37.5 μL 0.20 mmol), and 1-bromo-2-(triisopropylsilyl)acetylene (**1**) (105 mg, 90 μL, 0.40 mmol, 2 equiv) according to general procedure, at 85 °C for 48 h, and obtained as a yellow oil (58 mg, 0.13 mmol, 66% yield). <sup>1</sup>H NMR (400 MHz, Chloroform-*d*) δ 7.64 – 7.56 (m, 2H), 7.55 – 7.45 (m, 2H), 6.52 (s, 1H), 4.27 (q, *J* = 7.1 Hz, 2H), 1.32 (t, *J* = 7.1 Hz, 3H), 1.16 (s, 21H). <sup>13</sup>C NMR (101 MHz, Chloroform-*d*) δ 164.9, 136.4, 134.5, 131.8 (2C), 128.8 (2C), 124.3, 124.2, 106.5, 102.6, 60.6, 18.8 (6C), 14.5, 11.5 (3C). HRMS (ESI+) *m/z* calc. for C<sub>22</sub>H<sub>32</sub>BrO<sub>2</sub>Si<sup>+</sup> [M+H]<sup>+</sup>: 435.1349; found: 435.1368.

***Ethyl (Z)-2,3-diphenyl-5-(triisopropylsilyl)pent-2-en-4-ynoate (9e)***

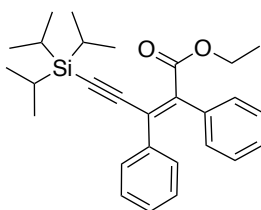

The title compound was prepared by reaction between (RhCp\*Cl<sub>2</sub>)<sub>2</sub> (3.09 mg, 0.005 mmol, 0.025 equiv), AgSbF<sub>6</sub> (13.74 mg, 0.04 mmol, 0.20 equiv), LiOAc (2.64 mg, 0.04 mmol, 0.20 equiv), Ag<sub>2</sub>CO<sub>3</sub> (55 mg, 0.2 mmol, 1 equiv), ethyl (*E*)-2,3-diphenylacrylate (**8e**) (50.5 mg, 54.3 μL 0.20 mmol), and 1-bromo-2-(triisopropylsilyl)acetylene (**1**) (105 mg, 90 μL, 0.40 mmol, 2 equiv) according to general procedure, at 85 °C for 48 h, and obtained as a colorless oil (72 mg, 0.17 mmol, 84% yield). <sup>1</sup>H NMR (500 MHz, Chloroform-*d*) δ 7.33 – 7.23 (m, 2H), 7.24 – 7.10 (m, 8H), 4.33 (q, *J* = 7.1 Hz, 2H), 1.34 (t, *J* = 7.1 Hz, 3H), 1.14 (s, 21H). <sup>13</sup>C NMR (126 MHz, Chloroform-*d*) δ 168.8, 140.7, 137.0, 135.2, 129.9 (2C), 129.5 (2C), 128.3 (2C), 128.1, 128.04, 127.96 (2C), 125.5, 105.9, 99.3, 61.6, 18.8 (6C), 14.2, 11.5 (3C). HRMS (ESI+) *m/z* calc. for C<sub>28</sub>H<sub>36</sub>NaO<sub>2</sub>Si<sup>+</sup> [M+Na]<sup>+</sup>: 455.2377; found: 455.2377.

***(Z)-4-Phenyl-6-(triisopropylsilyl)hex-3-en-5-yn-2-one (9f)***

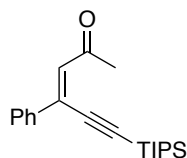

General procedure starting from (*E*)-4-phenylbut-3-en-2-one (**8f**) (29.2 mg, 0.2 mmol) at 45 °C. Brown liquid (40 mg, 61 % yield). <sup>1</sup>H NMR (500 MHz, Chloroform-*d*) δ 7.76 – 7.71 (m, 2H), 7.41 – 7.37 (m, 3H), 6.74 (s, 1H), 2.63 (s, 3H), 1.21 – 1.13 (m, 21H). <sup>13</sup>C NMR (75 MHz, CDCl<sub>3</sub>)

$\delta$  198.06, 137.49, 133.89, 133.23, 129.84, 128.53, 127.24, 107.66, 103.72, 30.51, 18.60, 11.30.

**HRMS** (ESI+)  $m/z$  calc. for  $C_{21}H_{30}NaOSi$   $[M+Na]^+$ : 349.1958. Found: 349.1960.

**1-(2-((Triisopropylsilyl)ethynyl)cyclopent-1-en-1-yl)ethan-1-one (9g)**

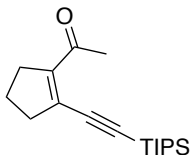

General procedure starting from 1-(cyclopent-1-en-1-yl)ethan-1-one (**8g**) (67.0 mg, 0.4 mmol) and 1-Bromo-2-(triisopropylsilyl)acetylene (**1**) (52 mg, 0.2 mmol, 1 equiv) at 45 °C. Yellow liquid (35 mg, 60 % yield). **<sup>1</sup>H NMR** (300 MHz, Chloroform-*d*)  $\delta$  2.70 (m, 4H), 2.59 (s, 3H), 1.92 – 1.78 (m, 2H), 1.09 (m, 21H). **<sup>13</sup>C NMR** (75 MHz, CDCl<sub>3</sub>)  $\delta$  196.55, 147.49, 134.11, 105.86, 103.15, 40.94, 32.86, 29.52, 21.62, 18.55, 11.19. **HRMS** (ESI+)  $m/z$  calc. for  $C_{18}H_{30}NaOSi$   $[M+Na]^+$ : 313.1958. Found: 313.1967.

**2-((Triisopropylsilyl)ethynyl)phenyl pivalate (11a)**

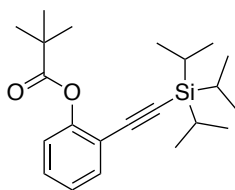

The title compound was prepared by reaction between  $(RhCp^*Cl_2)_2$  (3.09 mg, 0.005 mmol, 0.025 equiv),  $AgSbF_6$  (13.74 mg, 0.04 mmol, 0.20 equiv),  $LiOAc$  (2.64 mg, 0.04 mmol, 0.20 equiv),  $Ag_2CO_3$  (55 mg, 0.2 mmol, 1 equiv), phenyl pivalate (**10a**) (35.6 mg, 42.4  $\mu$ L, 0.20 mmol), and 1-bromo-2-(triisopropylsilyl)acetylene (**1**) (105 mg, 90  $\mu$ L, 0.40 mmol, 2 equiv) according to general procedure, at 90°C for 72 h, and obtained as a colorless oil (25 mg, 0.07 mmol, 35% yield). **<sup>1</sup>H NMR** (500 MHz, Chloroform-*d*)  $\delta$  7.53 (dd,  $J = 7.7, 1.6$  Hz, 1H), 7.31 (ddd,  $J = 8.2, 7.4, 1.7$  Hz, 1H), 7.16 (td,  $J = 7.6, 1.2$  Hz, 1H), 7.05 (dd,  $J = 8.2, 1.1$  Hz, 1H), 1.39 (s, 9H), 1.12 (s, 21H). **<sup>13</sup>C NMR** (126 MHz, Chloroform-*d*)  $\delta$  176.5, 151.6, 134.7, 129.4, 125.6, 122.4, 117.7, 102.1, 95.8, 39.3, 27.4 (3C), 18.8 (6C), 11.5 (3C). **HRMS** (ESI+)  $m/z$  calc. for  $C_{22}H_{35}O_2Si^+$   $[M+H]^+$ : 359.2401; found: 359.2417.

**2-((Triisopropylsilyl)ethynyl)naphthalen-1-yl acetate (11b)**

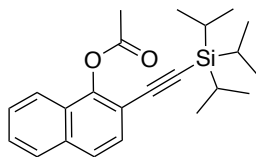

The title compound was prepared by reaction between  $(\text{RhCp}^*\text{Cl}_2)_2$  (3.09 mg, 0.005 mmol, 0.025 equiv),  $\text{AgSbF}_6$  (13.74 mg, 0.04 mmol, 0.20 equiv),  $\text{LiOAc}$  (2.64 mg, 0.04 mmol, 0.20 equiv),  $\text{Ag}_2\text{CO}_3$  (55 mg, 0.2 mmol, 1 equiv), naphthalen-1-yl acetate (**10b**) (37.2 mg, 0.20 mmol), and 1-bromo-2-(triisopropylsilyl)acetylene (**1**) (105 mg, 90  $\mu\text{L}$ , 0.40 mmol, 2 equiv) according to general procedure, at 70 °C for 24 h, and obtained as a dark yellow solid (29 mg, 0.08 mmol, 40% yield).  $^1\text{H NMR}$  (500 MHz, Chloroform-*d*)  $\delta$  7.86 – 7.78 (m, 2H), 7.67 (d,  $J = 8.4$  Hz, 1H), 7.57 – 7.43 (m, 3H), 2.48 (s, 3H), 1.17 (s, 21H).  $^{13}\text{C NMR}$  (126 MHz, Chloroform-*d*)  $\delta$  168.5, 148.9, 134.3, 129.2, 128.1, 127.3, 127.2, 127.1, 125.9, 121.5, 114.1, 102.4, 97.0, 21.0, 18.8 (6C), 11.5 (3C). **HRMS** (ESI+)  $m/z$  calc. for  $\text{C}_{23}\text{H}_{30}\text{NaO}_2\text{Si}^+$   $[\text{M}+\text{Na}]^+$ : 389.1907; found: 389.1918. **Mp**: 47-51 °C.

**Triisopropyl((2-(methylsulfinyl)phenyl)ethynyl)silane (11c)**

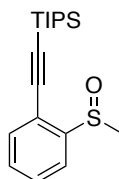

General procedure starting from (methylsulfinyl)benzene (**10c**) (28 mg, 0.2 mmol) at 100 °C. Yellow liquid (55 mg, 55 % yield).  $^1\text{H NMR}$  (500 MHz, Chloroform-*d*)  $\delta$  7.94 (dd,  $J = 7.8, 1.3$  Hz, 1H), 7.56 (td,  $J = 7.8, 1.3$  Hz, 1H), 7.51 (dd,  $J = 7.8, 1.3$  Hz, 1H), 7.42 (td,  $J = 7.8, 1.3$  Hz, 1H), 2.83 (s, 3H), 1.15 – 1.10 (m, 21H).  $^{13}\text{C NMR}$  (75 MHz,  $\text{CDCl}_3$ )  $\delta$  147.47, 133.12, 130.18, 129.57, 123.04, 119.39, 101.17, 100.97, 42.08, 18.57, 11.19. **HRMS** (ESI+)  $m/z$  calc. for  $\text{C}_{18}\text{H}_{28}\text{NaO}_2\text{Si}^+$   $[\text{M}+\text{Na}]^+$ : 343.1522. Found: 343.1518.

**(Z)-Triisopropyl(5-(phenylthio)pent-3-en-1-yn-1-yl)silane (11d)**

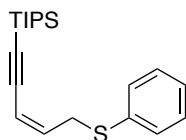

General procedure starting from allyl(phenyl)sulfane (**10d**) (30.0 mg, 0.2 mmol) at 50 °C. Yellow liquid (55 mg, 83 % yield).  $^1\text{H NMR}$  (300 MHz, Chloroform-*d*)  $\delta$  7.42 – 7.37 (m, 2H), 7.32 – 7.25 (m, 2H), 7.22 – 7.16 (m, 1H), 6.00 (dt,  $J = 10.7, 7.5$  Hz, 1H), 5.63 (dt,  $J = 10.7, 1.0$  Hz, 1H),

3.87 (dd,  $J = 7.5, 1.0$  Hz, 2H), 1.13 (s, 21H).  $^{13}\text{C}$  NMR (75 MHz,  $\text{CDCl}_3$ )  $\delta$  139.26, 135.42, 129.32, 128.75, 126.05, 112.03, 102.45, 97.47, 32.96, 18.63, 11.24. HRMS (ESI+)  $m/z$  calc. for  $\text{C}_{20}\text{H}_{31}\text{SSi}$   $[\text{M}+\text{H}]^+$ : 331.1910. Found: 331.1909.

***((2-(1,3-Dithian-2-yl)phenyl)ethynyl)triisopropylsilane (11e)***

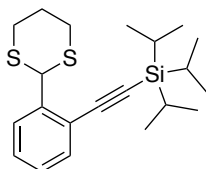

The title compound was prepared by reaction between  $(\text{RhCp}^*\text{Cl}_2)_2$  (3.09 mg, 0.005 mmol, 0.025 equiv),  $\text{AgSbF}_6$  (13.74 mg, 0.04 mmol, 0.20 equiv),  $\text{LiOAc}$  (2.64 mg, 0.04 mmol, 0.20 equiv),  $\text{Ag}_2\text{CO}_3$  (55 mg, 0.2 mmol, 1 equiv), 2-phenyl-1,3-dithiane (**10e**) (39 mg, 0.20 mmol), and 1-bromo-2-(triisopropylsilyl)acetylene (**1**) (105 mg, 90  $\mu\text{L}$ , 0.40 mmol, 2 equiv) according to general procedure, at 90  $^\circ\text{C}$  for 16 h, and obtained as a colorless solid (40 mg, 0.11 mmol, 53% yield).  $^1\text{H}$  NMR (500 MHz, Chloroform- $d$ )  $\delta$  7.63 (dd,  $J = 7.9, 1.3$  Hz, 1H), 7.47 (dd,  $J = 7.9, 1.3$  Hz, 1H), 7.32 (td,  $J = 7.6, 1.4$  Hz, 1H), 7.23 (td,  $J = 7.6, 1.3$  Hz, 1H), 5.87 (s, 1H), 3.04 (ddd,  $J = 14.9, 12.5, 2.4$  Hz, 2H), 2.91 (ddd,  $J = 14.4, 4.2, 3.0$  Hz, 2H), 2.17 (dtt,  $J = 13.8, 4.5, 2.4$  Hz, 1H), 1.94 (dtt,  $J = 14.1, 12.5, 3.1$  Hz, 1H), 1.18 (s, 21H).  $^{13}\text{C}$  NMR (126 MHz, Chloroform- $d$ )  $\delta$  140.9, 132.8, 129.2, 128.1, 128.0, 122.2, 104.2, 96.0, 49.4, 32.5 (2C), 25.4, 18.9 (6C), 11.5 (3C). HRMS (ESI+)  $m/z$  calc. for  $\text{C}_{21}\text{H}_{33}\text{S}_2\text{Si}$   $[\text{M}+\text{H}]^+$ : 377.1784. Found: 377.1787. **Mp**: 56-60  $^\circ\text{C}$ .

***((2-((Methylthio)methyl)-1,3-phenylene)bis(ethyne-2,1-diyl))bis(triisopropylsilane) (11f)***

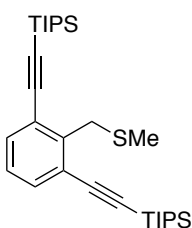

General procedure starting from benzyl(methyl)sulfane (**10f**) (27.6 mg, 0.2 mmol) using 1-Bromo-2-(triisopropylsilyl)acetylene (**1**) (110 mg, 0.42 mmol) at 100  $^\circ\text{C}$ . Light yellow liquid (75 mg, 75 % yield).  $^1\text{H}$  NMR (300 MHz, Chloroform- $d$ )  $\delta$  7.46 (d,  $J = 7.7$  Hz, 2H), 7.18 – 7.10 (t,  $J = 7.7$  Hz, 1H), 4.14 (s, 3H), 2.13 (s, 3H), 1.16 (s, 42H).  $^{13}\text{C}$  NMR (75 MHz,  $\text{CDCl}_3$ )  $\delta$  143.31, 133.09, 126.40, 123.66, 104.70, 96.11, 34.64, 18.68, 15.35, 11.36. HRMS (ESI+)  $m/z$  calc. for  $\text{C}_{30}\text{H}_{31}\text{SSi}_2$   $[\text{M}+\text{H}]^+$ : 499.3245. Found: 499.3254.

***((5-Chloro-2-(methylsulfonyl)-1,3-phenylene)bis(ethyne-2,1-diyl))bis(triisopropylsilane) (11g)***

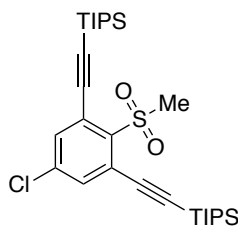

General procedure starting from 1-chloro-4-(methylsulfonyl)benzene (**10g**) (38.1 mg, 0.2 mmol) using 1-Bromo-2-(triisopropylsilyl)acetylene (**1**) (110 mg, 0.42 mmol) at 100 °C. Yellow liquid (45 mg, 41 % yield).  $^1\text{H NMR}$  (300 MHz, Chloroform-*d*)  $\delta$  7.54 (s, 2H), 3.28 (s, 3H), 1.14 (m, 42H).  $^{13}\text{C NMR}$  (75 MHz,  $\text{CDCl}_3$ )  $\delta$  139.93, 137.84, 135.46, 125.68, 103.76, 101.47, 42.95, 18.58, 11.28. **HRMS** (ESI+)  $m/z$  calc. for  $\text{C}_{29}\text{H}_{48}\text{ClSO}_2\text{Si}_2$   $[\text{M}+\text{H}]^+$ : 551.2597. Found: 551.2613.

#### *1-(2,6-Bis((triisopropylsilyl)ethynyl)phenyl)-N,N-dimethylmethanamine (11h)*

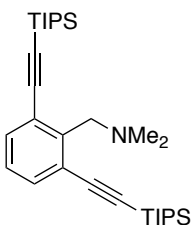

General procedure at 90 °C starting from *N,N*-dimethyl-1-phenylmethanamine **xx** (27.0 mg, 0.2 mmol) and 1-Bromo-2-(triisopropylsilyl)acetylene (**10h**) (110 mg, 0.42 mmol, 2.1 equiv). Yellow liquid (50 mg, 0.10 mmol, 50 % yield).  $^1\text{H NMR}$  (300 MHz, Chloroform-*d*)  $\delta$  7.46 (d,  $J = 7.7$  Hz, 2H), 7.15 (t,  $J = 7.7$  Hz, 1H), 3.83 (s, 2H), 2.33 (s, 6H), 1.14 (s, 42H).  $^{13}\text{C NMR}$  (101 MHz,  $\text{CDCl}_3$ )  $\delta$  142.57, 133.33, 126.74, 125.12, 105.46, 94.84, 59.44, 45.85, 18.72, 11.39. **HRMS** (ESI+)  $m/z$  calc. for  $\text{C}_{31}\text{H}_{54}\text{NSi}_2$   $[\text{M}+\text{H}]^+$ : 496.3789. Found: 496.3809.

#### *Tert-butyl 2,5-bis((triisopropylsilyl)ethynyl)-1H-pyrrole-1-carboxylate (11i)*

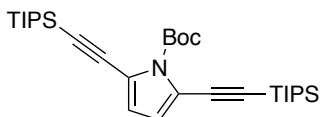

General procedure starting from *tert*-butyl 1*H*-pyrrole-1-carboxylate (**10i**) (33.4 mg, 0.2 mmol) using 1-Bromo-2-(triisopropylsilyl)acetylene (**1**) (110 mg, 0.42 mmol) at 45 °C. Yellow liquid (70 mg, 66 % yield).  $^1\text{H NMR}$  (300 MHz, Chloroform-*d*)  $\delta$  6.45 (s, 2H), 1.62 (s, 9H), 1.12 (m, 42H).  $^{13}\text{C NMR}$  (75 MHz,  $\text{CDCl}_3$ )  $\delta$  147.58, 119.83, 116.67, 97.91, 96.20, 84.85, 27.84, 18.63, 11.36. **HRMS** (ESI+)  $m/z$  calc. for  $\text{C}_{31}\text{H}_{53}\text{NaNO}_2\text{Si}_2$   $[\text{M}+\text{Na}]^+$ : 550.3507. Found: 550.3513.

## 5) Mechanistic Studies

## 5.1 - Intermolecular Kinetic Isotope Effects

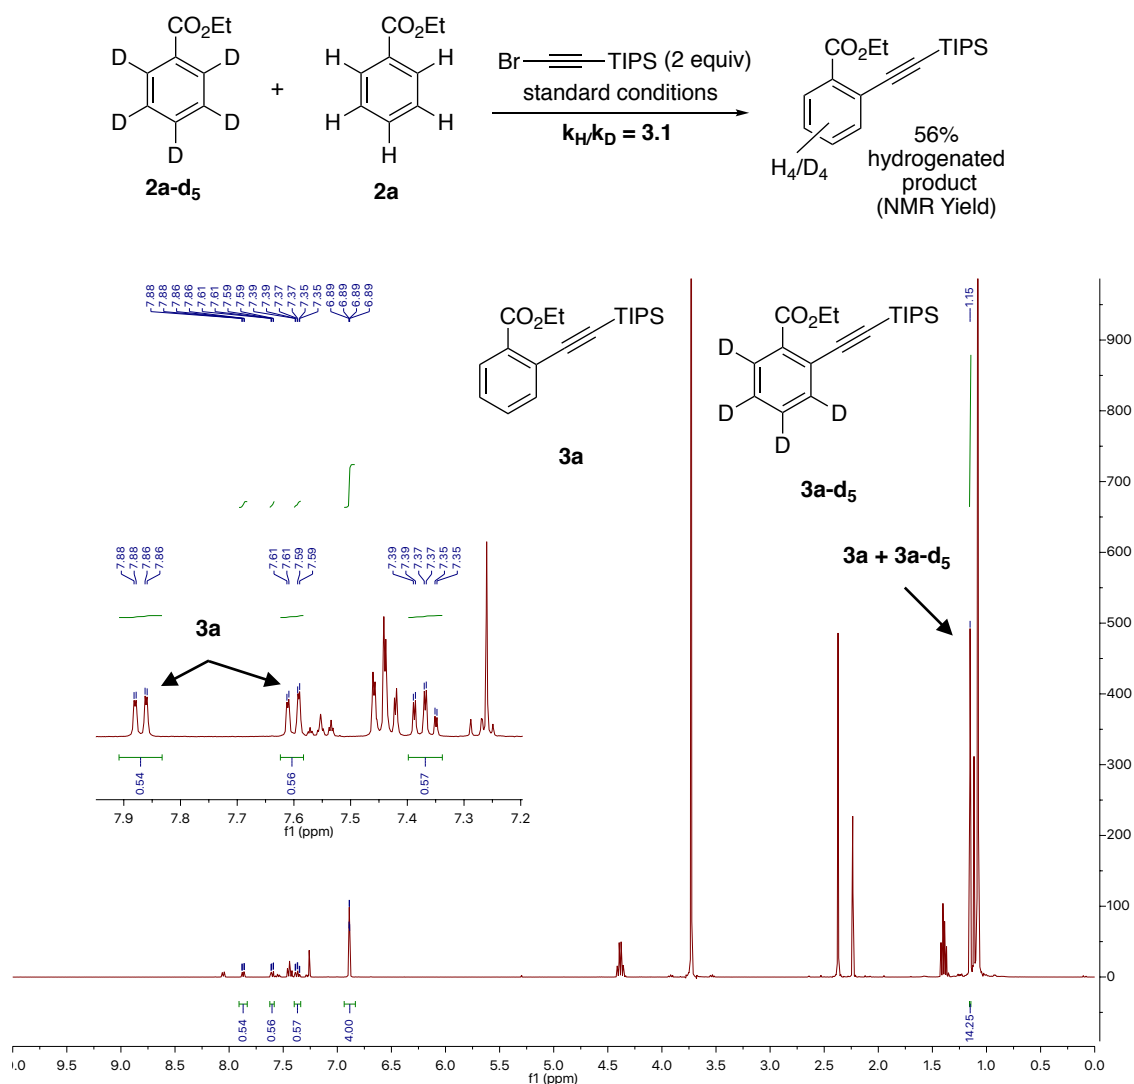

Figure S5.1.1 - <sup>1</sup>H NMR of crude reaction

(RhCp\*Cl<sub>2</sub>)<sub>2</sub>, AgSbF<sub>6</sub>, LiOAc, Ag<sub>2</sub>CO<sub>3</sub>, were dissolved in DCE (2 mL) in a 10 mL tube. Benzoic esters **2a** (0.2 mmol) and **2a-d<sub>5</sub>** (0.2 mmol) and 1-bromo-2-(triisopropylsilyl)acetylene (**1**) (0.4 mmol) were then added with a Hamilton syringe and the reaction mixture was stirred 45 °C for 16 h. After cooling at ambient temperature, bromomesitylene (2 equiv) was added as internal standard through an Hamilton syringe and the crude mixture was filtrated in a pipette through a short plug of silica and washed with DCM. After filtration, the solvents were removed under vacuum. The yield of the mono-alkynylated product was determined by <sup>1</sup>H NMR analysis of the crude using bromomesitylene as internal standard. The residue was purified by silica gel chromatography column with Toluene 100% as eluent to yield the corresponding mono alkynylated products (**3a+3a-d<sub>5</sub>**) KIE value (3.1) was determined by the ratio of desired products.



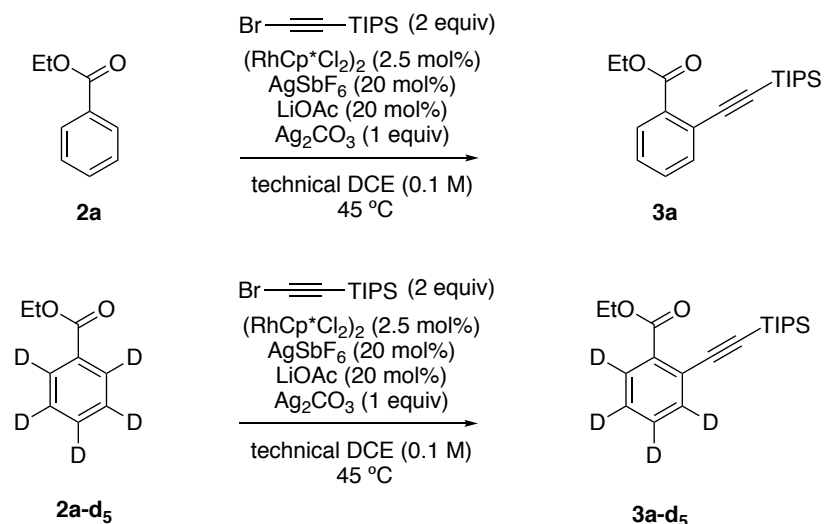

**Figure S5.2 - Parallel Kinetic Isotope Effects**

$(\text{RhCp}^*\text{Cl}_2)_2$ ,  $\text{AgSbF}_6$ ,  $\text{LiOAc}$ ,  $\text{Ag}_2\text{CO}_3$ , were dissolved in DCE (2 mL) in a 10 mL tube. Benzoic esters (**2a** or **2a-d<sub>5</sub>**) (0.15 mmol) and 1-bromo-2-(triisopropylsilyl)acetylene (**1**) (0.3 mmol) were then added with a Hamilton syringe and the reaction mixture was stirred  $45\text{ }^\circ\text{C}$  for the indicated time : 30 min, 1 h, 2 h, 3 h or 5 h (five parallel runs). After cooling at ambient temperature, bromomesitylene (1 equiv) was added as internal standard through an Hamilton syringe and the crude mixture was filtrated in a pipette through a short plug of silica and washed with DCM. After filtration, the solvents were removed under vacuum. The yield of the mono-alkynylated product was determined by  $^1\text{H}$  NMR analysis of the crude using bromomesitylene as internal standard. For **2a**,  $y = 5.8281x + 10.195$ ,  $R^2 = 0.94271$ , for **2a-d<sub>5</sub>**,  $y = 1.9x + 2.55$ ,  $R^2 = 0.93109$ . KIE value (3.1) was determined by comparing the relative initial rates.

| Time (h) | NMR Yield <b>3a</b> (%) | NMR Yield <b>3a-d<sub>5</sub></b> (%) |
|----------|-------------------------|---------------------------------------|
| 0.5      | 12                      | 2.4                                   |
| 1        | 14                      | 5                                     |
| 2        | 24                      | 6.5                                   |
| 3        | 31                      | 9.4                                   |
| 5        | 37                      | 11.3                                  |

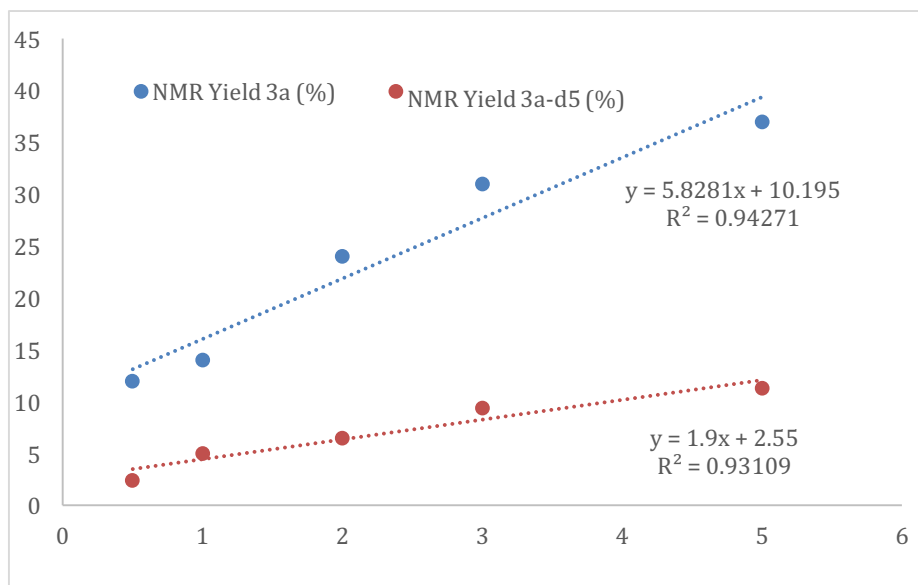

Figure S5.2.1- Initial rate data for the formation of 3a and 3a-d<sub>5</sub>

### 5.3 - Reaction in the presence of a radical scavenger

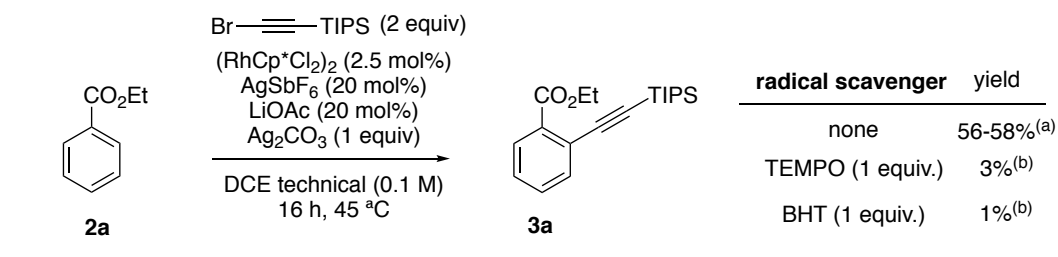

<sup>(a)</sup> Isolated Yield <sup>(b)</sup> NMR Yield determined using bromomesitylene as internal standard

The inhibition of the reaction in presence of a radical scavenger as TEMPO or BHT doesn't allow us to conclude about the possible intervention of a radical intermediate. Indeed, TEMPO and BHT could inhibit the activity of the catalyst through for example coordination. In order to check this last hypothesis, a mixture of Rhodium catalyst in presence of BHT under standard conditions was analyzed by  $^1\text{H}$  NMR after 16 h at 45 °C. The  $^1\text{H}$  NMR clearly showed major changes in both catalyst and BHT  $^1\text{H}$  NMR. Concerning the chemical shifts of the BHT substrate: the singlet of  $\text{H}_a$  protons is shifted to 6.98 ppm to 6.08 ppm in presence of the catalyst and OH peak disappears. For the Rhodium catalyst, we can also notice a shift of the cyclopentadienyl proton peak from 1.61 ppm to 2.02 ppm. These significant NMR shifts could suggest that the catalyst interact directly with the BHT in order to form a new complex, through the hydroxyle function, which could also inhibit the reaction.

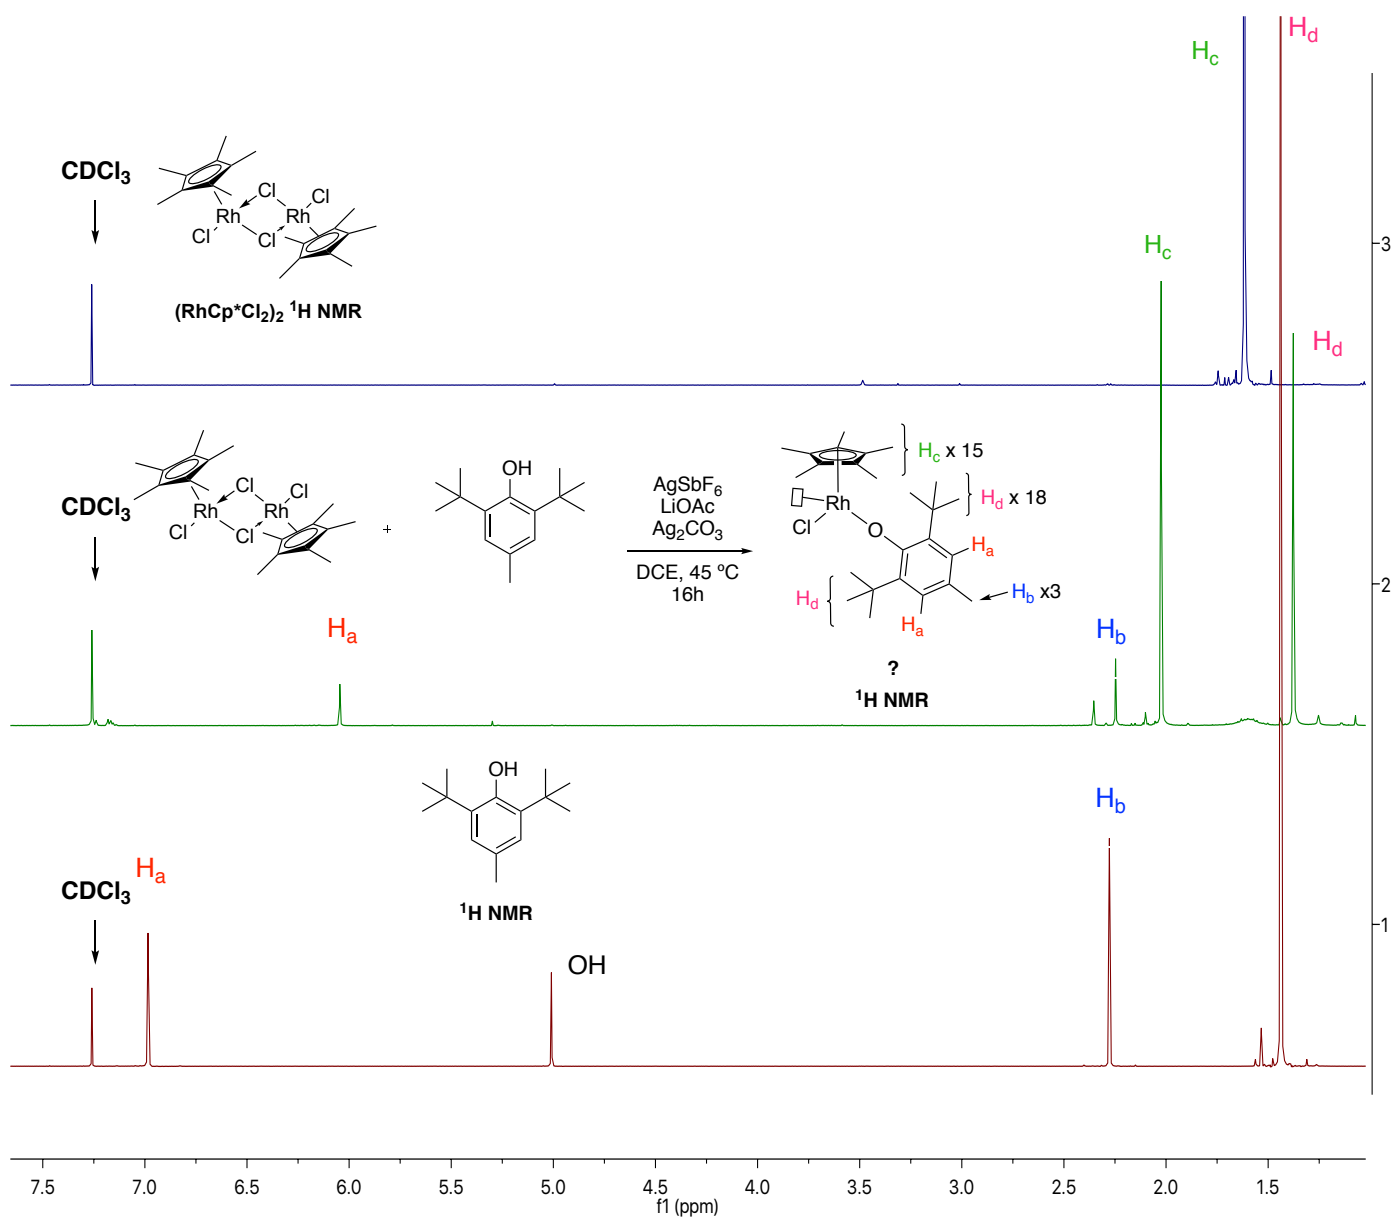

Figure S5.3.1 - Comparison of the  $^1\text{H}$  NMR of  $(\text{RhCpCl}_2)_2$ , BHT and the mixture of both



### Other competition experiments:

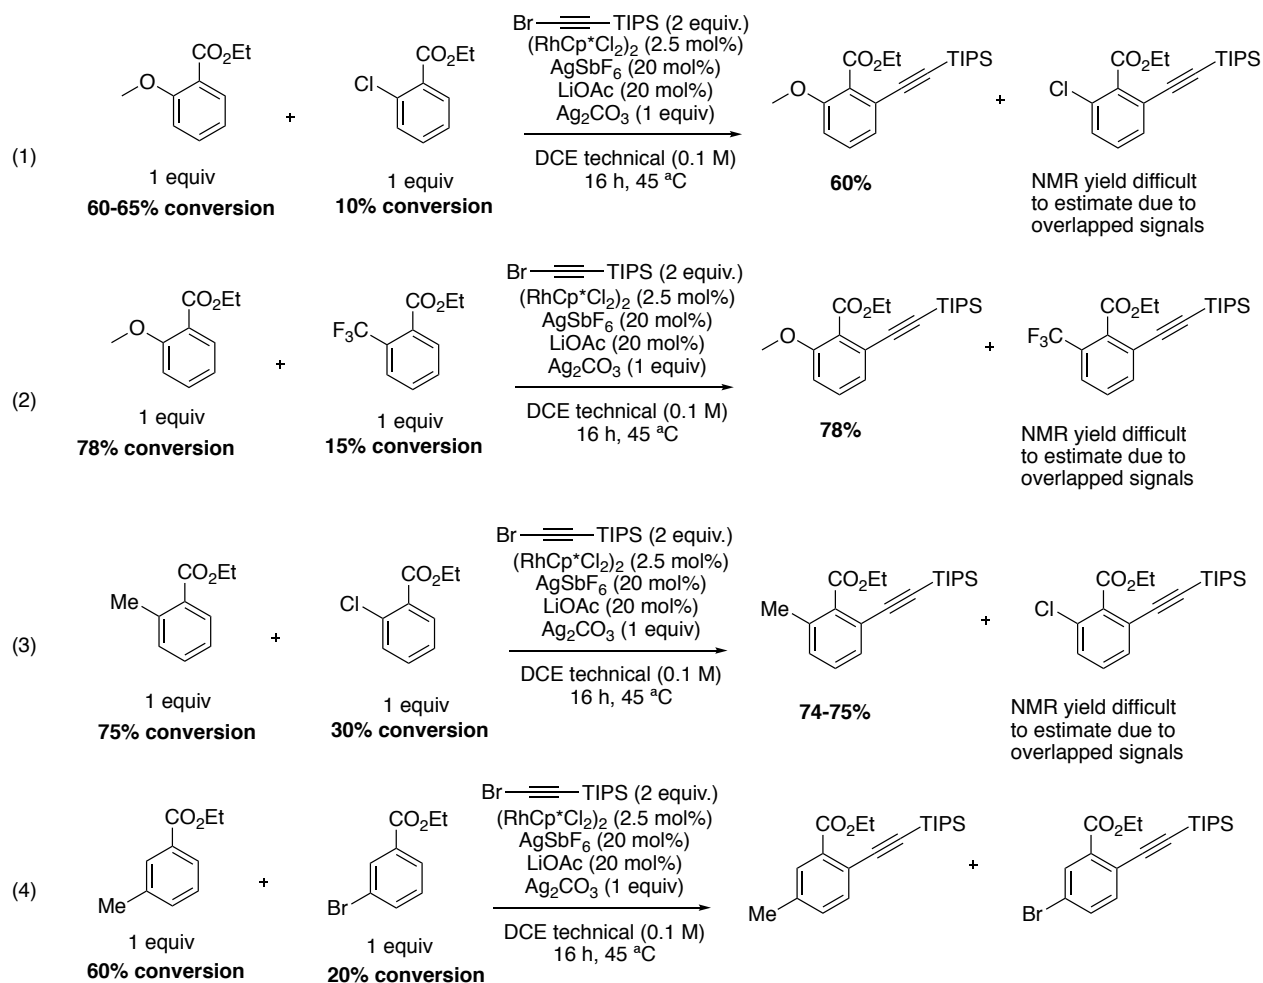

Conversion and NMR Yield were determined using bromomesitylene as internal standard in the crude mixture

#### Scheme S5.4.1 - Competition experiments

The intermolecular competition between electron rich and electron poor substrates suggests that substrates bearing electrodonating group in *meta* position of the CH functionalization site are more reactive. This result could indicate that the CH-activation step might occur through an electrophilic type mechanism.

In order to check that there is no steric bias when using *ortho* substituted ester, meta substituted were also used (Scheme S5.4.1, eq. 4) with weak activating or deactivating functional group still show the same tendency as previous experiments.

## 5.5 - Hammett Plot

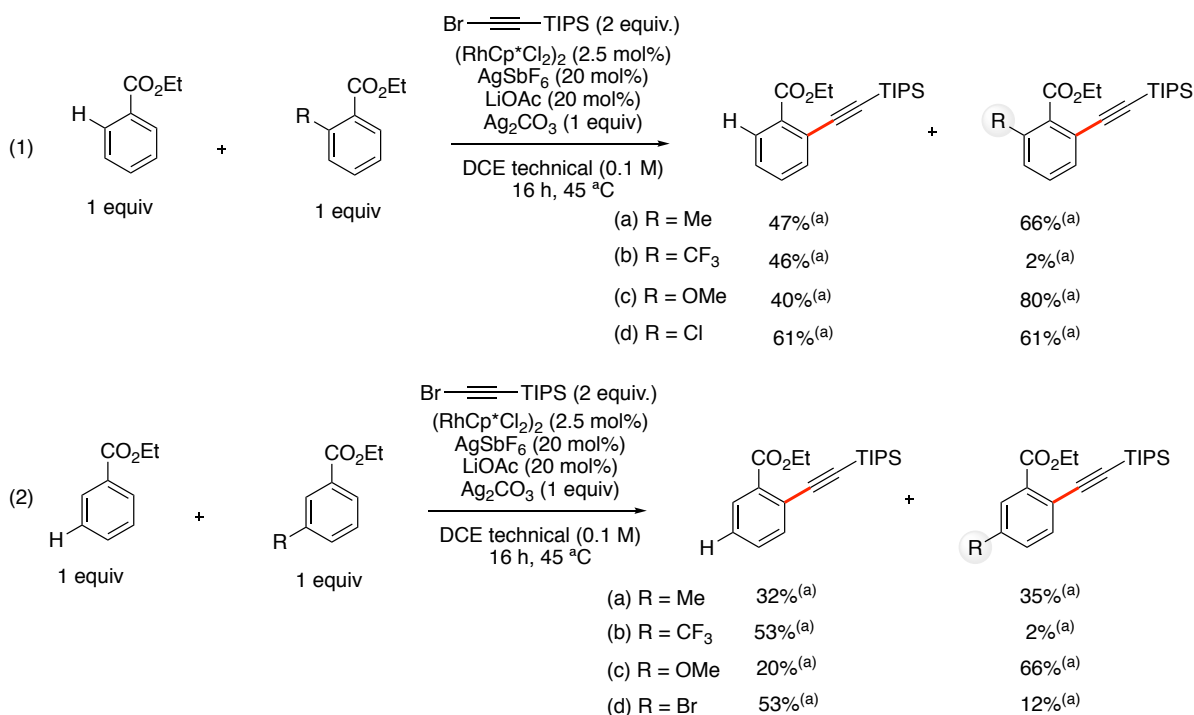

<sup>(a)</sup>NMR Yield were determined using bromomesitylene as internal standard in the crude mixture

**Scheme S5.5.1 - Hammett plot experiments: determination of  $k/k_0$**

The product ratios ( $k/k_0$ ) were correlated with  $\sigma$ -values ( $\sigma_m^+$ ,  $\sigma_p^+$  or  $\sigma_p$ ) to ascertain the existence of any linear free energy relationships.

| $R_{(meta)}$    | $k/k_0$ | $\log(k/k_0)$ | $\sigma_m^+$ | $R_{(para)}$    | $k/k_0$ | $\log(k/k_0)$ | $\sigma_p^+$ | $\sigma_p$ |
|-----------------|---------|---------------|--------------|-----------------|---------|---------------|--------------|------------|
| Me              | 1.40    | 0.146         | -0.07        | Me              | 1.10    | 0.041         | -0.31        | -0.27      |
| CF <sub>3</sub> | 0.04    | -1.39         | 0.43         | CF <sub>3</sub> | 0.04    | -1.39         | 0.61         | 0.54       |
| OMe             | 2       | 0.3           | 0.12         | OMe             | 3.3     | 0.52          | -0.78        | -0.27      |
| Cl              | 1       | 0             | 0.37         | Br              | 0.23    | -0.64         | 0.15         | 0.23       |

A Hammett correlation ( $R^2 = 0.99$  using  $\sigma_p^+$  or  $R^2 = 0.98$  using  $\sigma_p$ ) (Figures S5.5.1 and S5.5.2 respectively) was validated for substrates bearing substituents in *para* position to the reaction center. A negative  $\rho$  value also suggests that electron density is leaving the aromatic system in the product-determining step which is in accordance with an electrophilic mechanism occurring for the C-H activation step.<sup>3</sup>

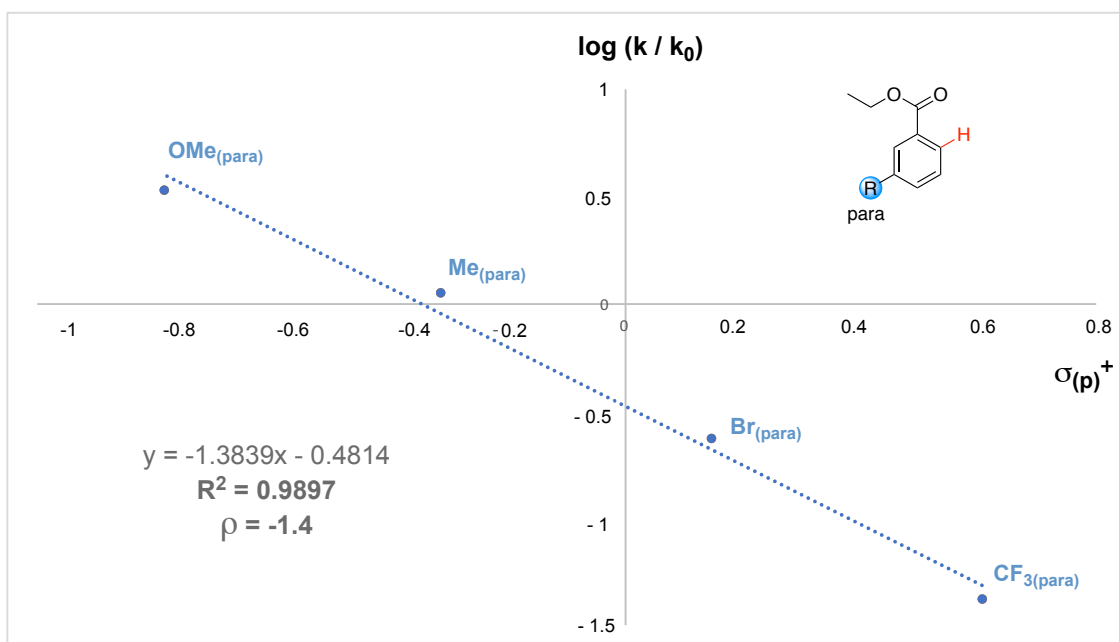

Figure S5.5.1 - Hammett plot using  $\sigma(p)^+$

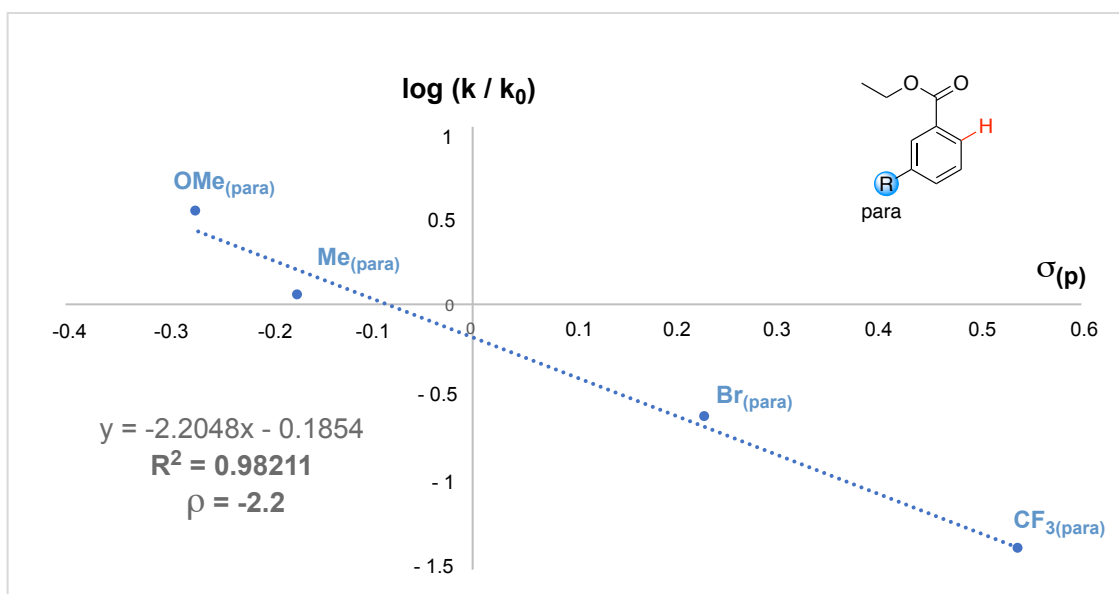

Figure S5.5.2 - Hammett plot using  $\sigma(p)$

However, this correlation could not be validated for substrates bearing functional groups in *meta* position to the C-H activation site (Figure S5.5.3).

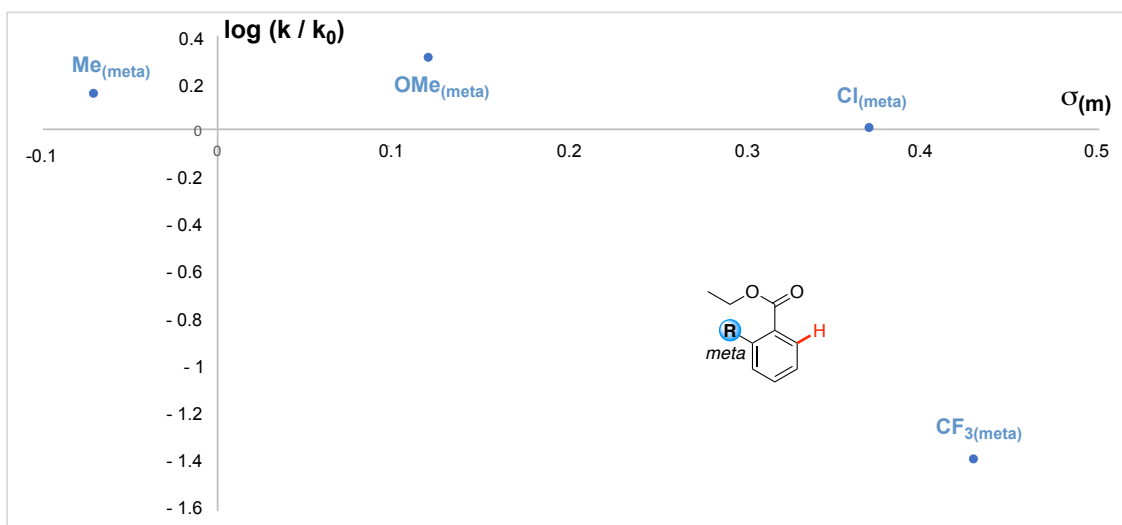

Figure S5.5.3 - Hammett plot using  $\sigma(m)$

A plausible explanation could be that, in this case, steric factors could also be involved. To validate this hypothesis a correlation was tested between  $\log(k/k_0)$  and different steric parameters (Taft parameters and Charton size values) (Figure S5.5.4).

| $R_{(meta)}$    | $\log(k/k_0)$ | $E_s$ (Taft) | $\sigma_v$ (Charton) |
|-----------------|---------------|--------------|----------------------|
| Me              | 0.146         | -1.24        | 0.52                 |
| CF <sub>3</sub> | -1.39         | -2.4         | 0.91                 |
| OMe             | 0.3           | -0.55        | 0.36                 |
| Cl              | 0             | -0.97        | 0.55                 |



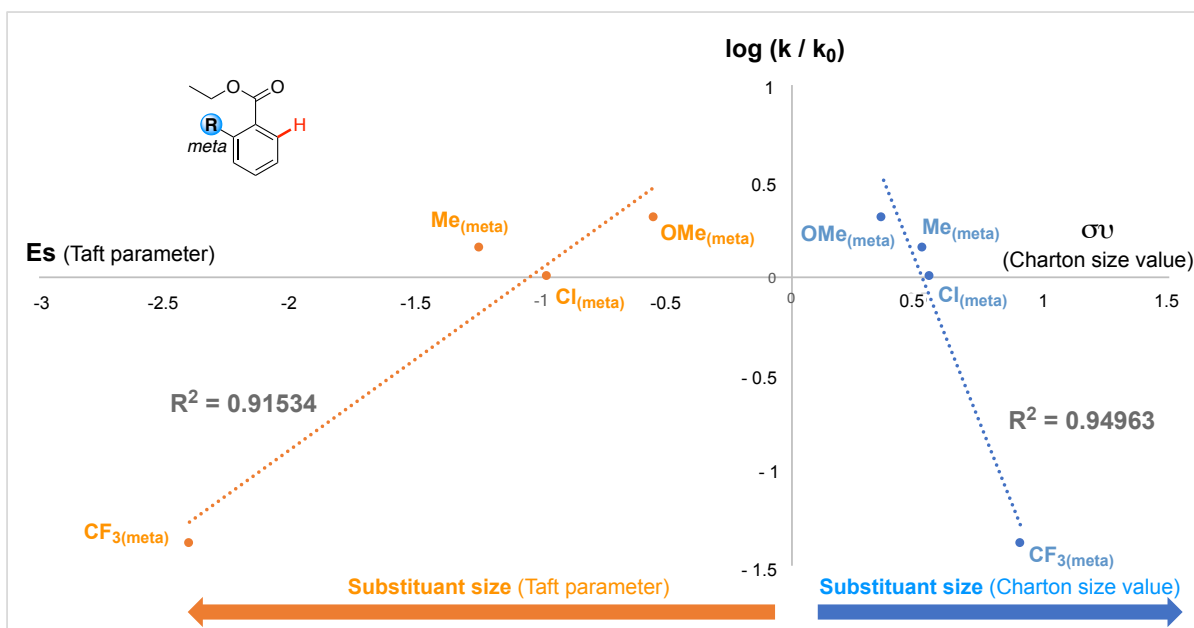

Figure S5.5.4 - Correlation between  $k/k_0$  and substituent size parameter

For both steric parameters, a correlation could be found ( $R^2 = 0.92$  and  $R^2 = 0.95$ ), which could validate the involvement of a steric bias in the case of substrates bearing functional group in meta position to the C-H activation site (Scheme S5.5.2).

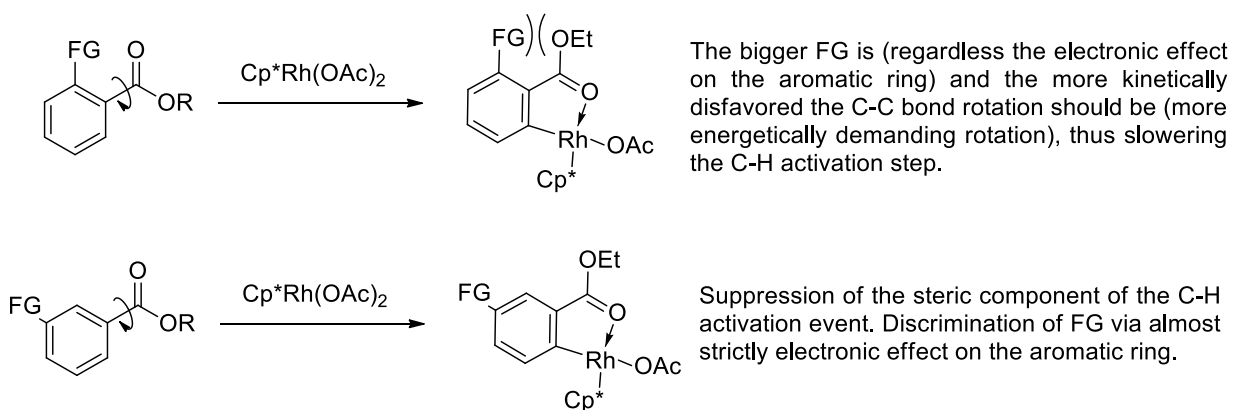

Scheme S5.5.2 - Steric Bias Hypothesis

## 6) $^1\text{H}$ and $^{13}\text{C}$ NMR Spectra

### *Ethyl 2-((triisopropylsilyl)ethynyl)benzoate (3a)*

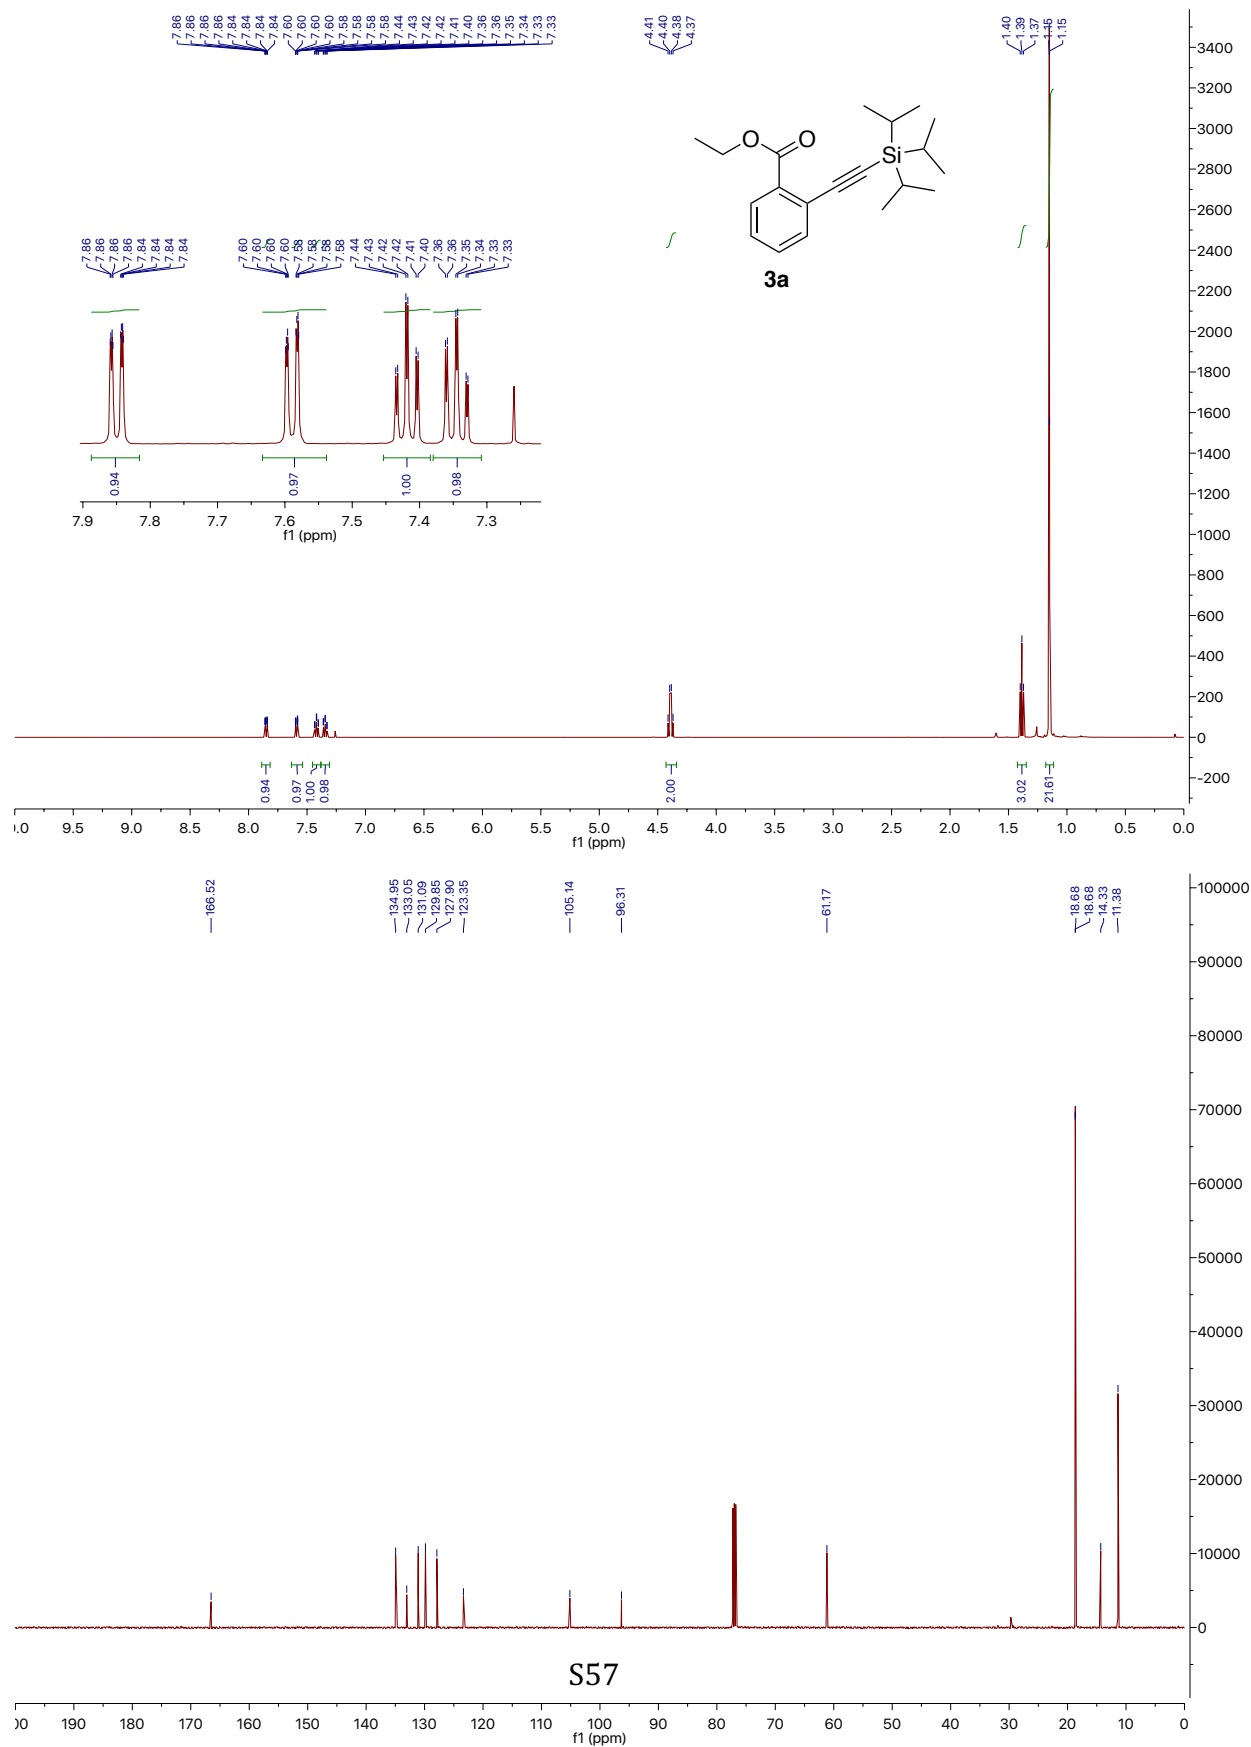

**Ethyl 2,6-bis((triisopropylsilyl)ethynyl)benzoate (3a'')**

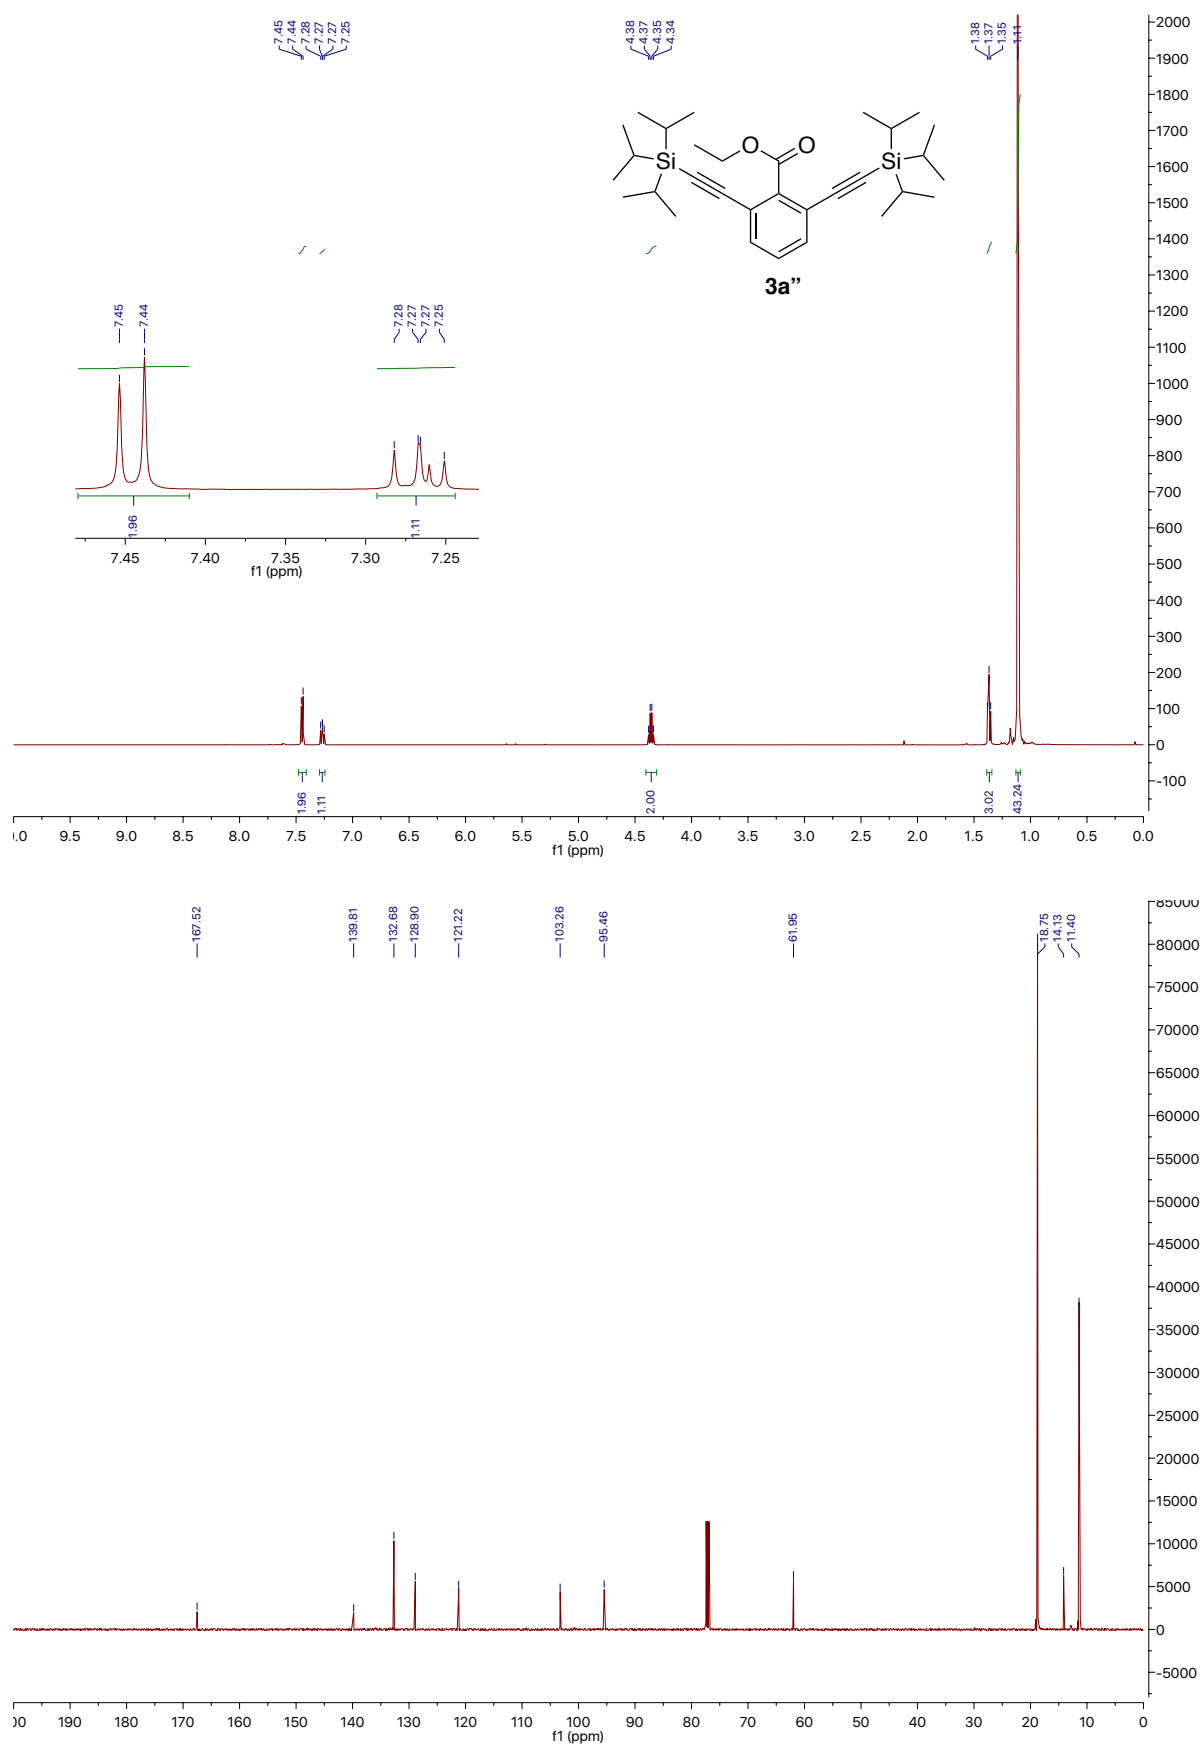



**Tert-butyl 2-((triisopropylsilyl)ethynyl)benzoate (3c)**

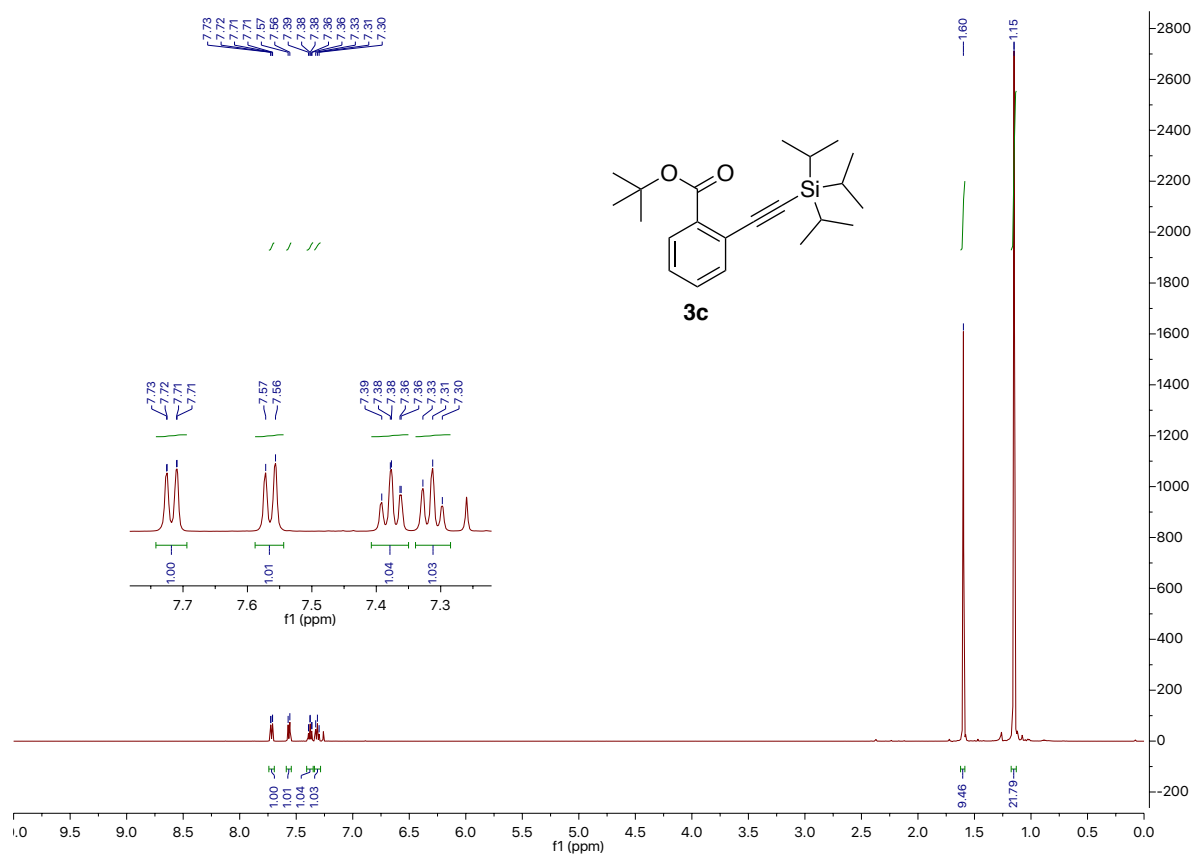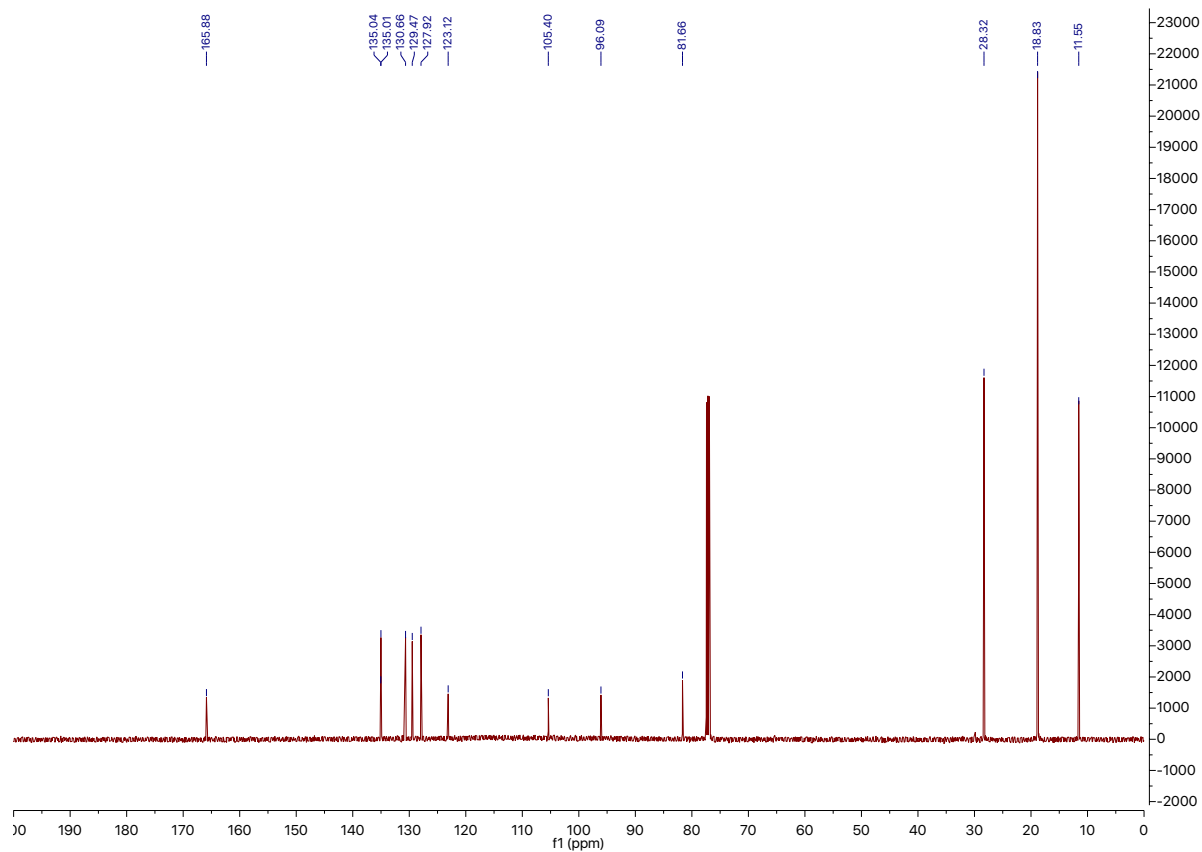

**Benzyl 2-((triisopropylsilyl)ethynyl)benzoate (3d)**

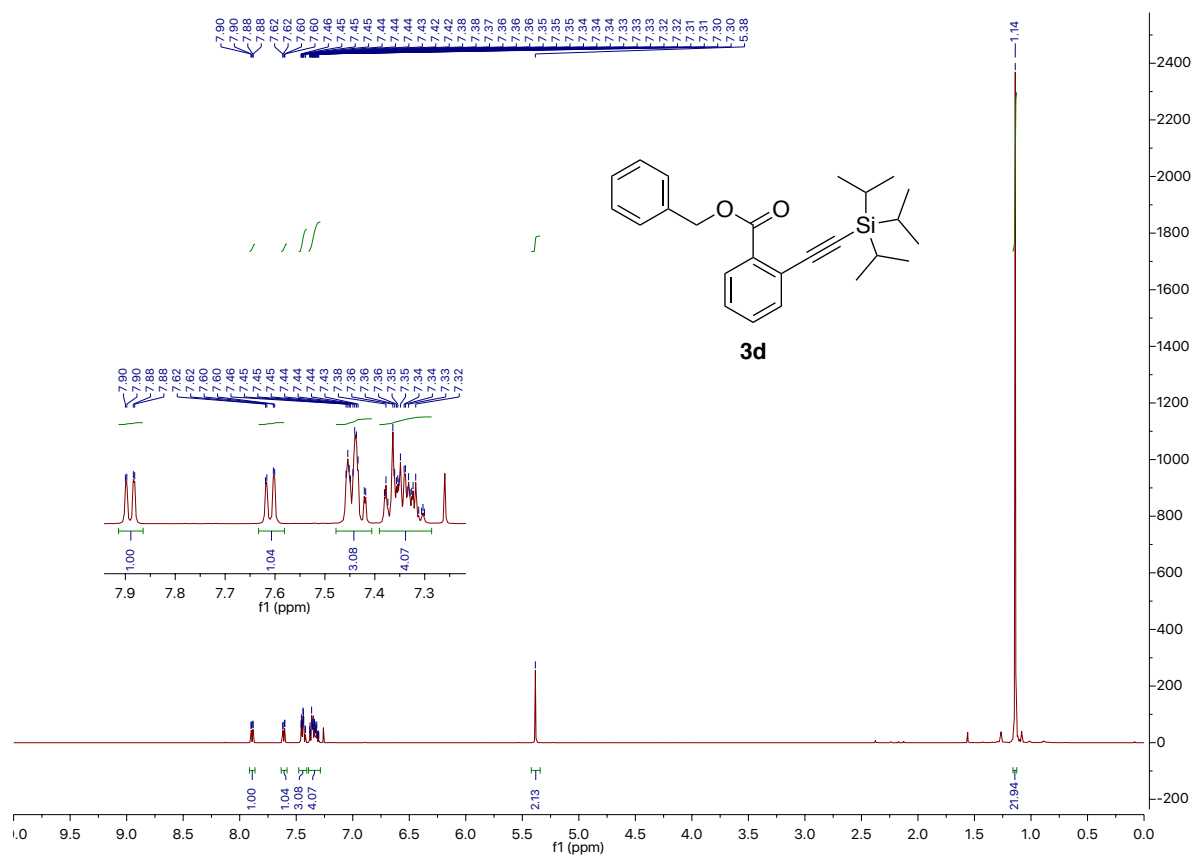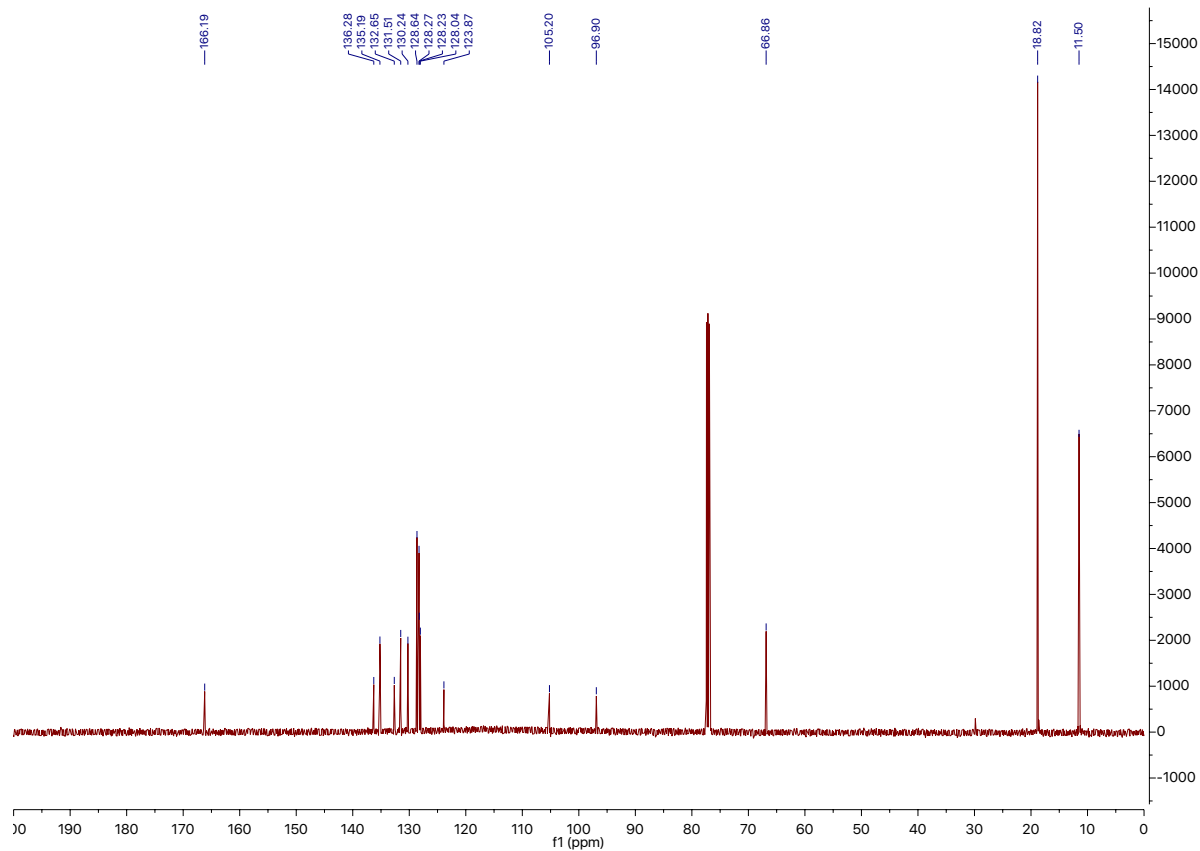

*Ethyl 2-methyl-6-((triisopropylsilyl)ethynyl)benzoate (3e)*

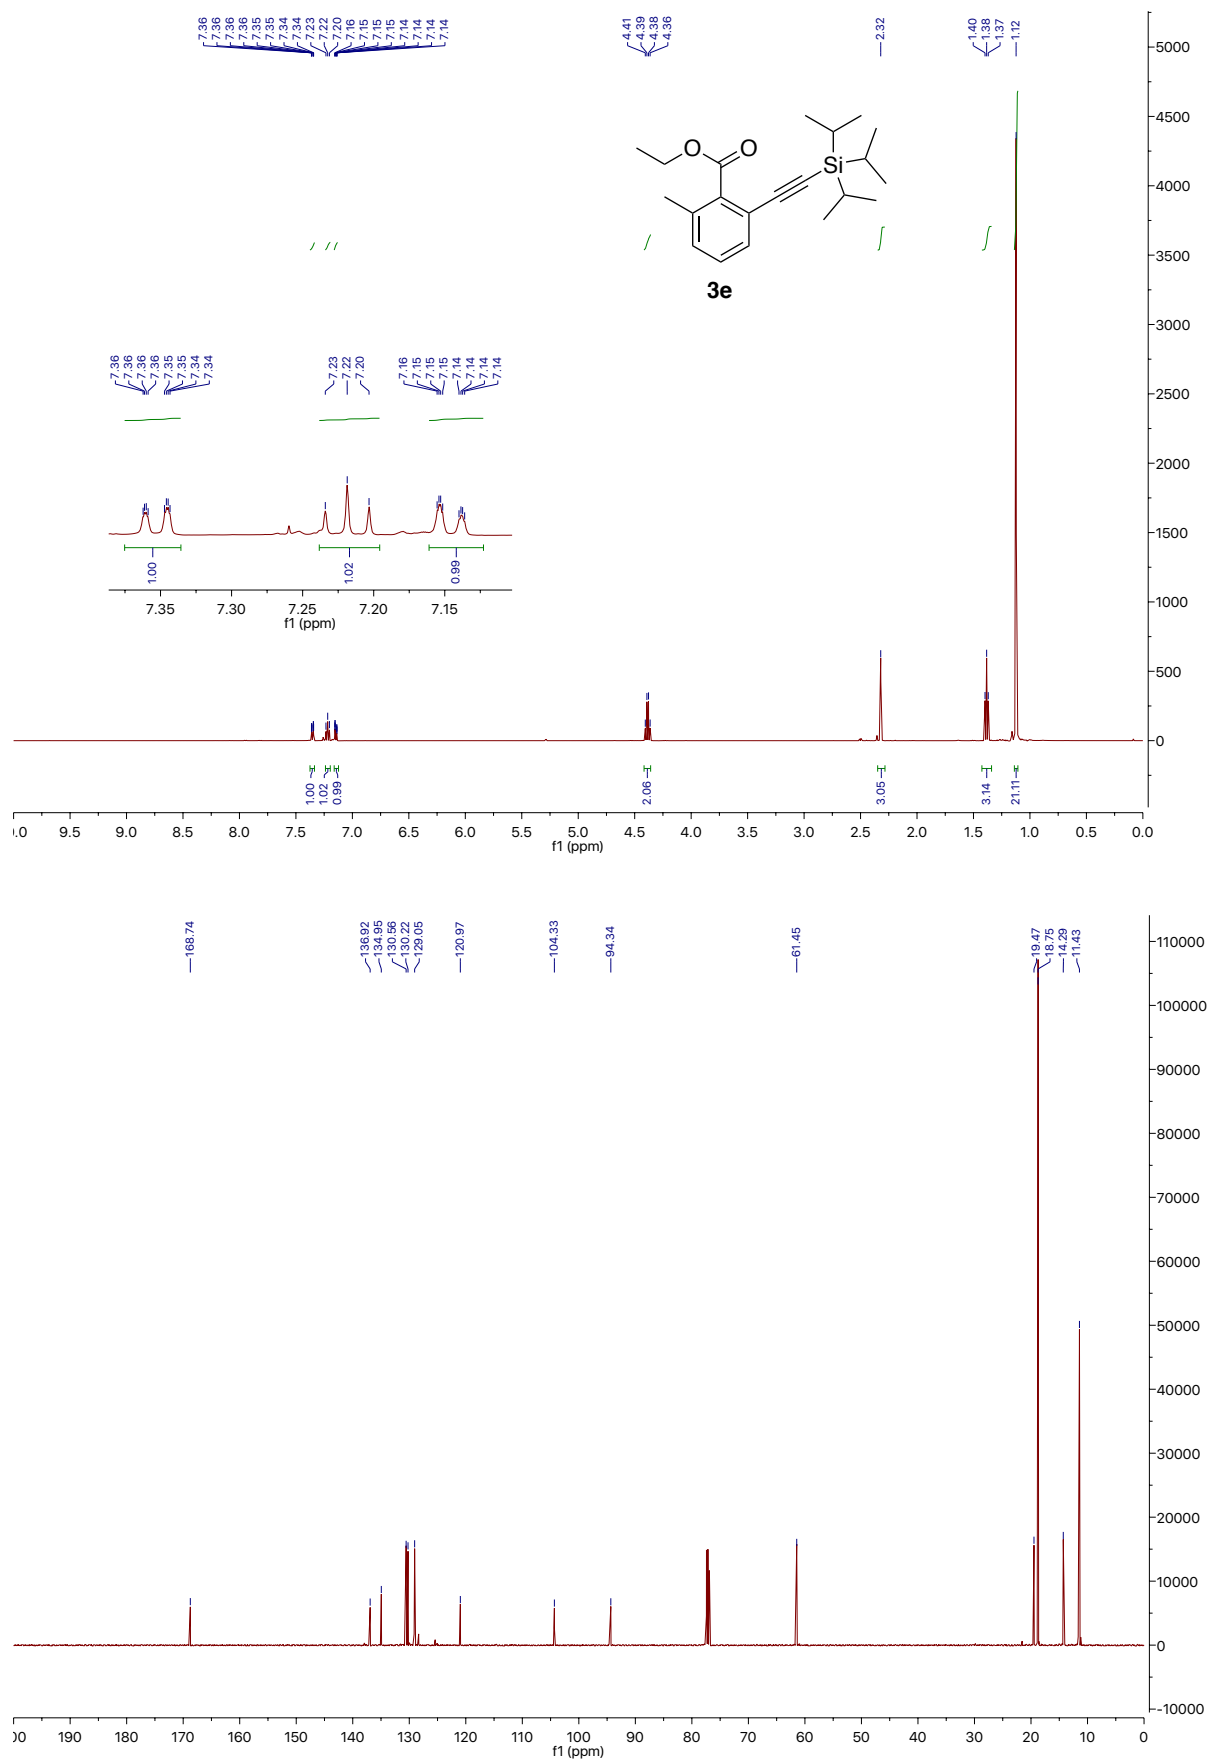

**Ethyl 2-chloro-6-((triisopropylsilyl)ethynyl)benzoate (3f)**

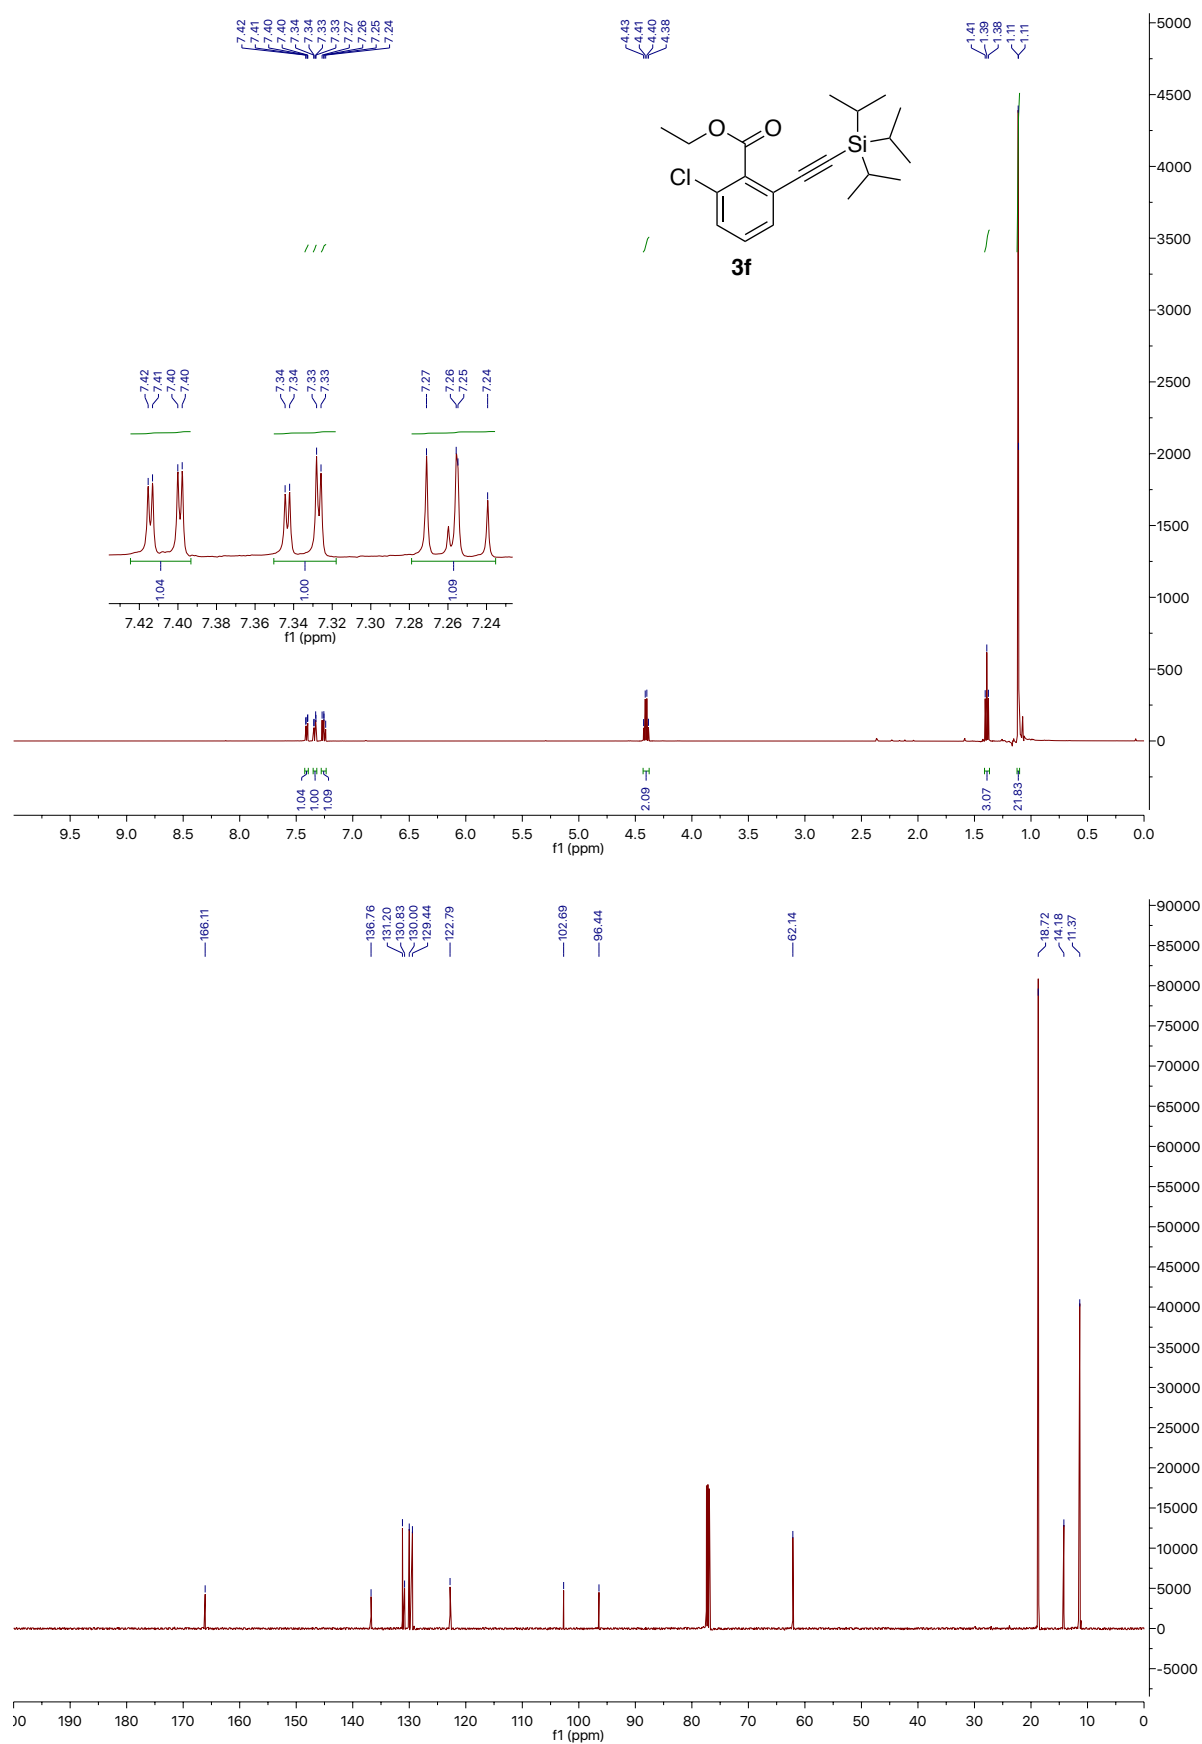



**Ethyl 2-methoxy-6-((triisopropylsilyl)ethynyl)benzoate (3g)**

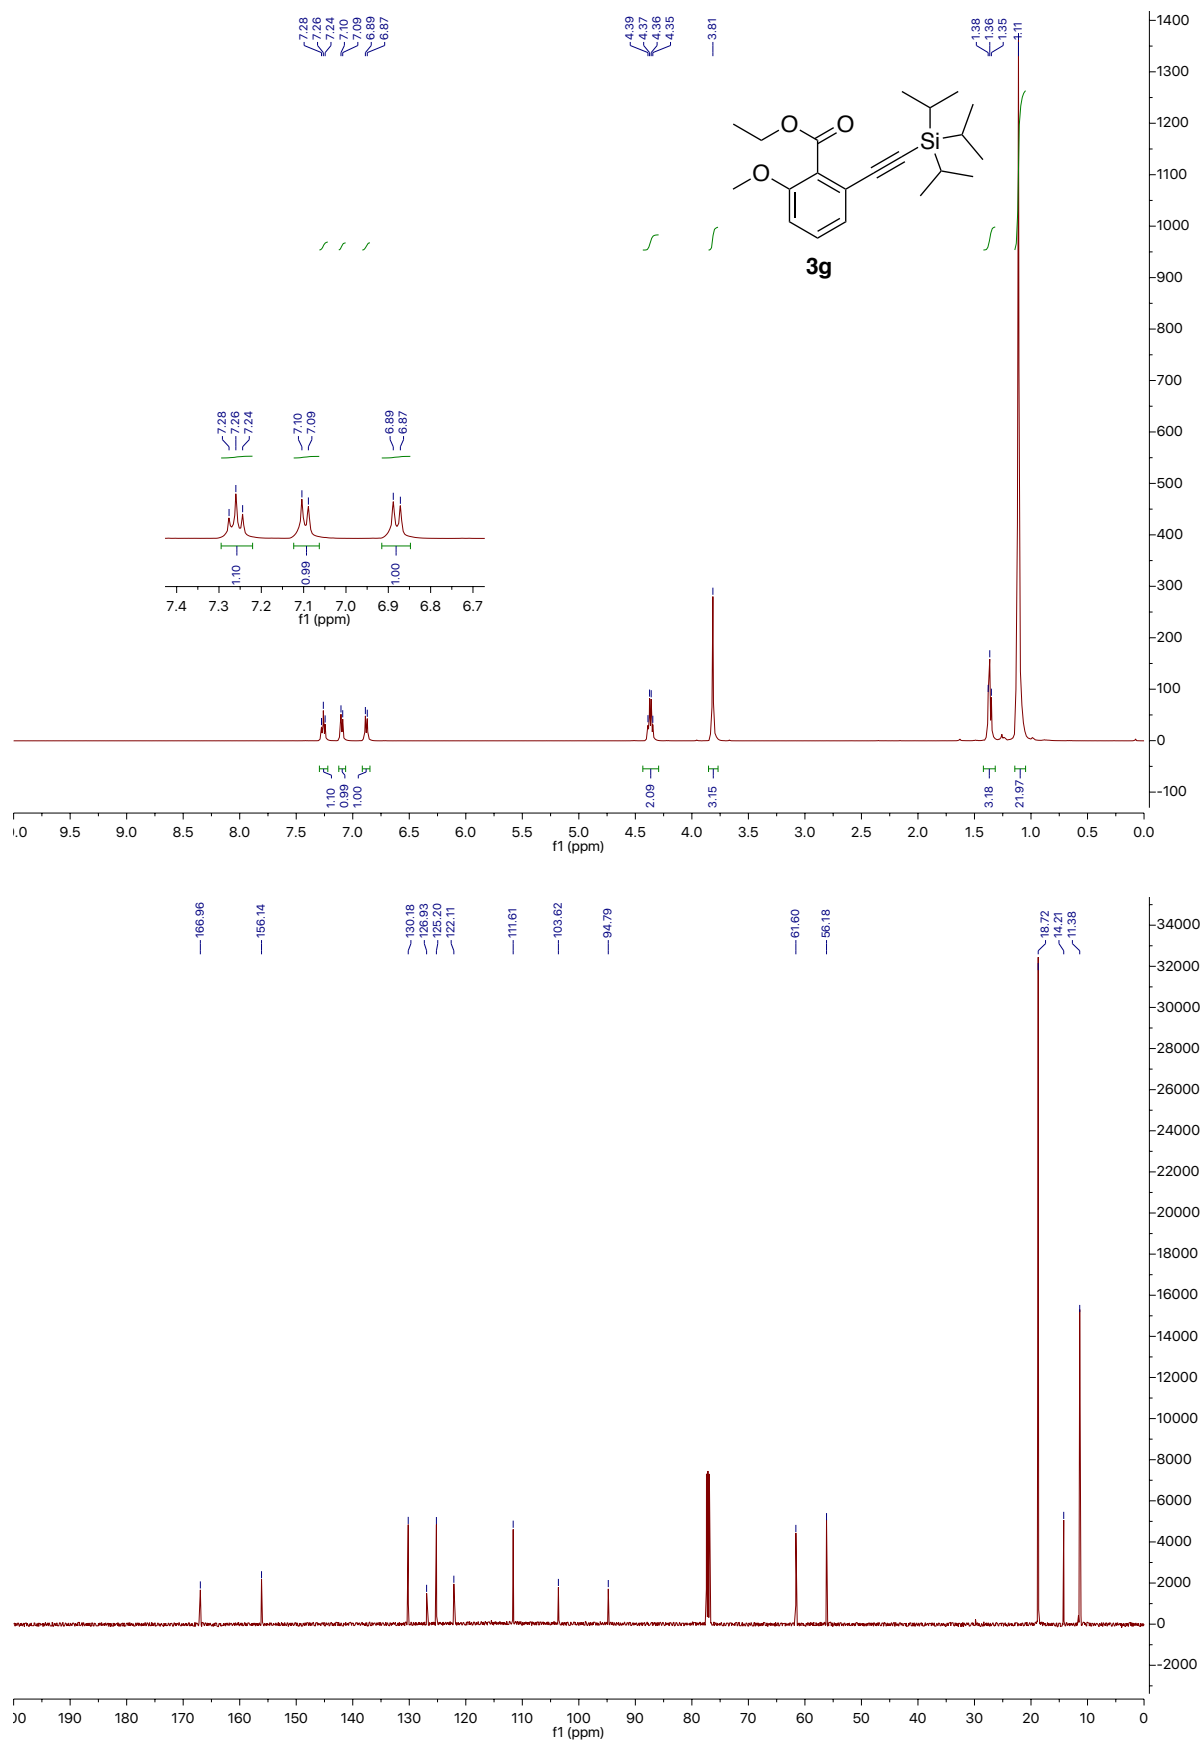

**Ethyl 2-(trifluoromethyl)-6-((triisopropylsilyl)ethynyl)benzoate (3h)**

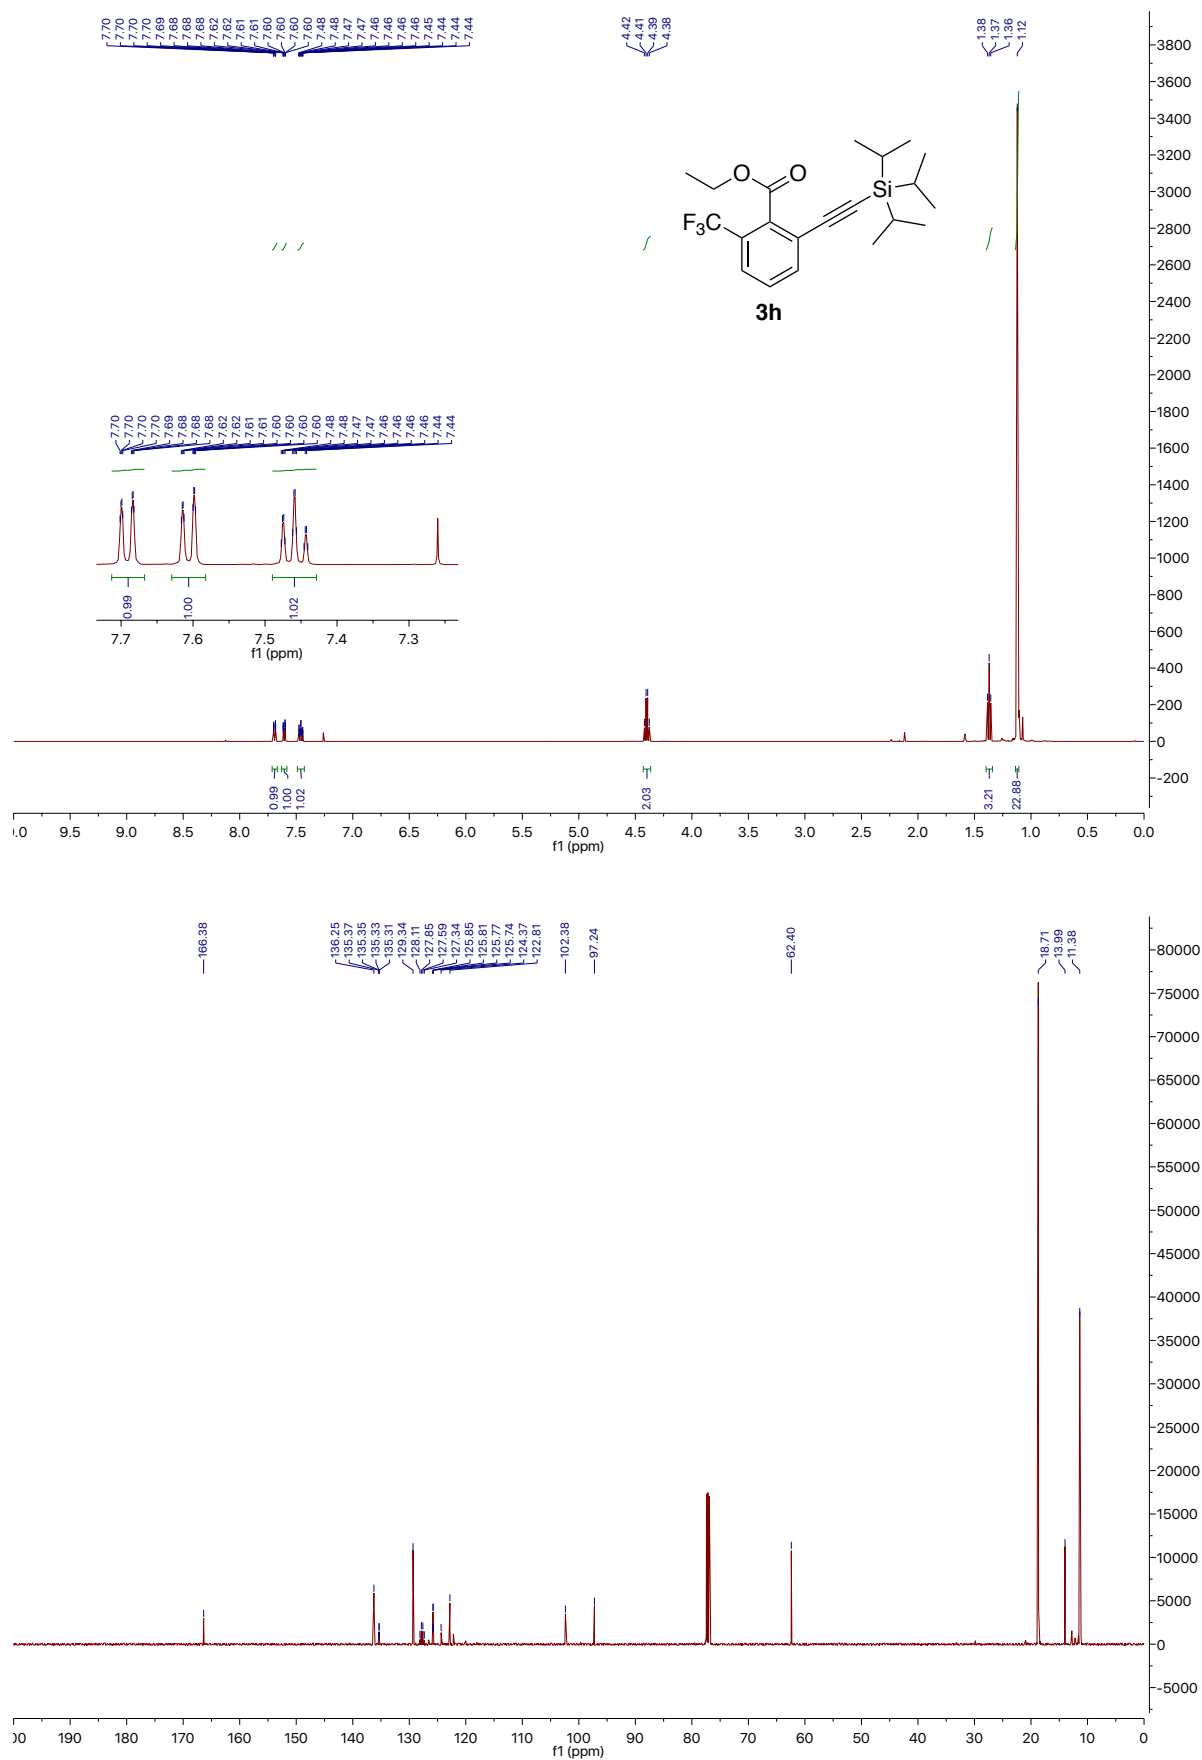

**Ethyl 5-methyl-2-((triisopropylsilyl)ethynyl)benzoate (3i)**

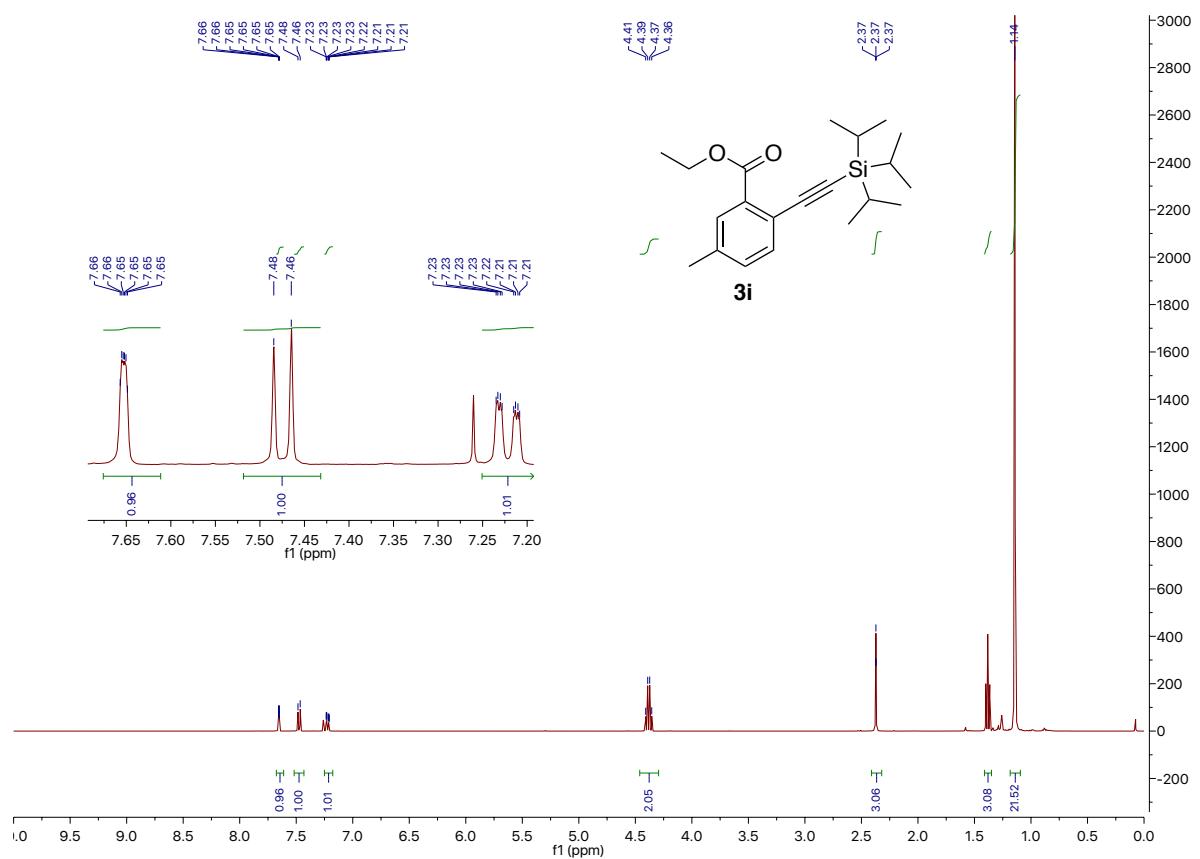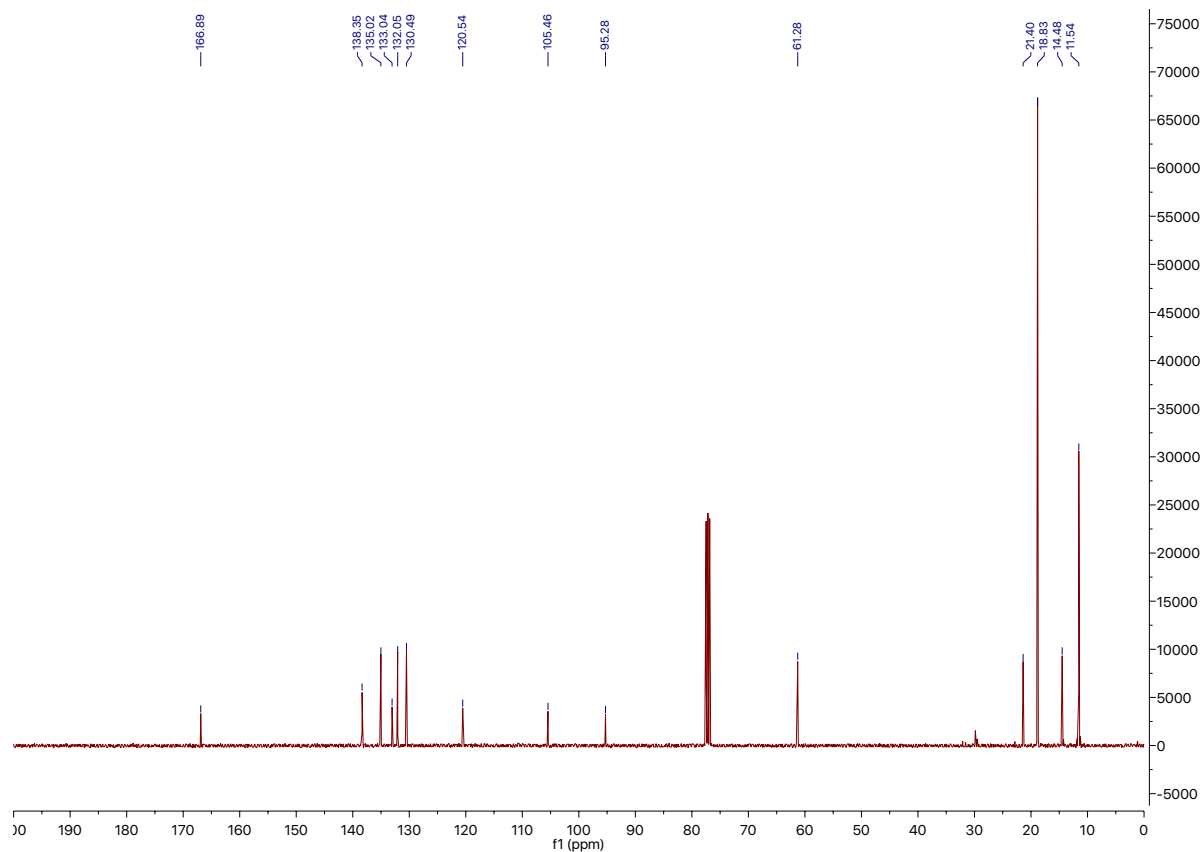

**Ethyl 3-fluoro-2-((triisopropylsilyl)ethynyl)benzoate (3j')**

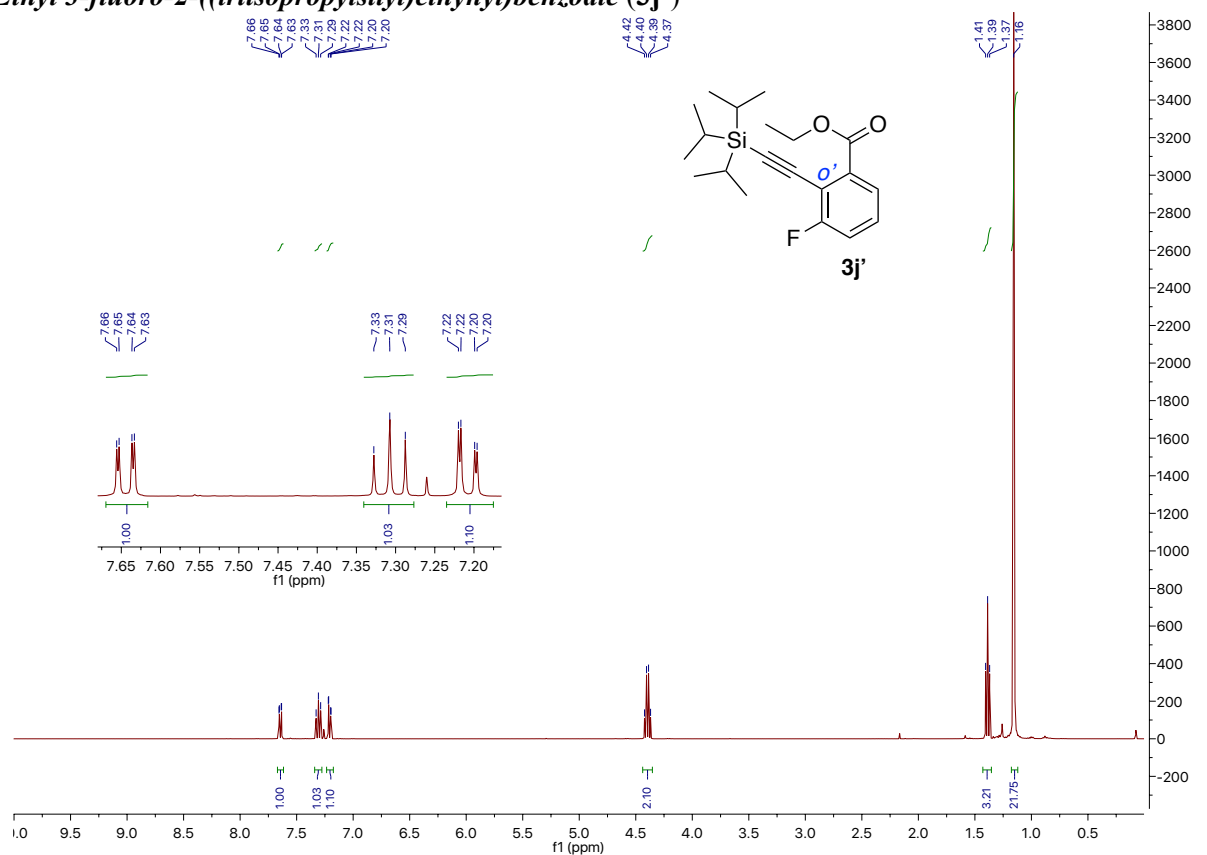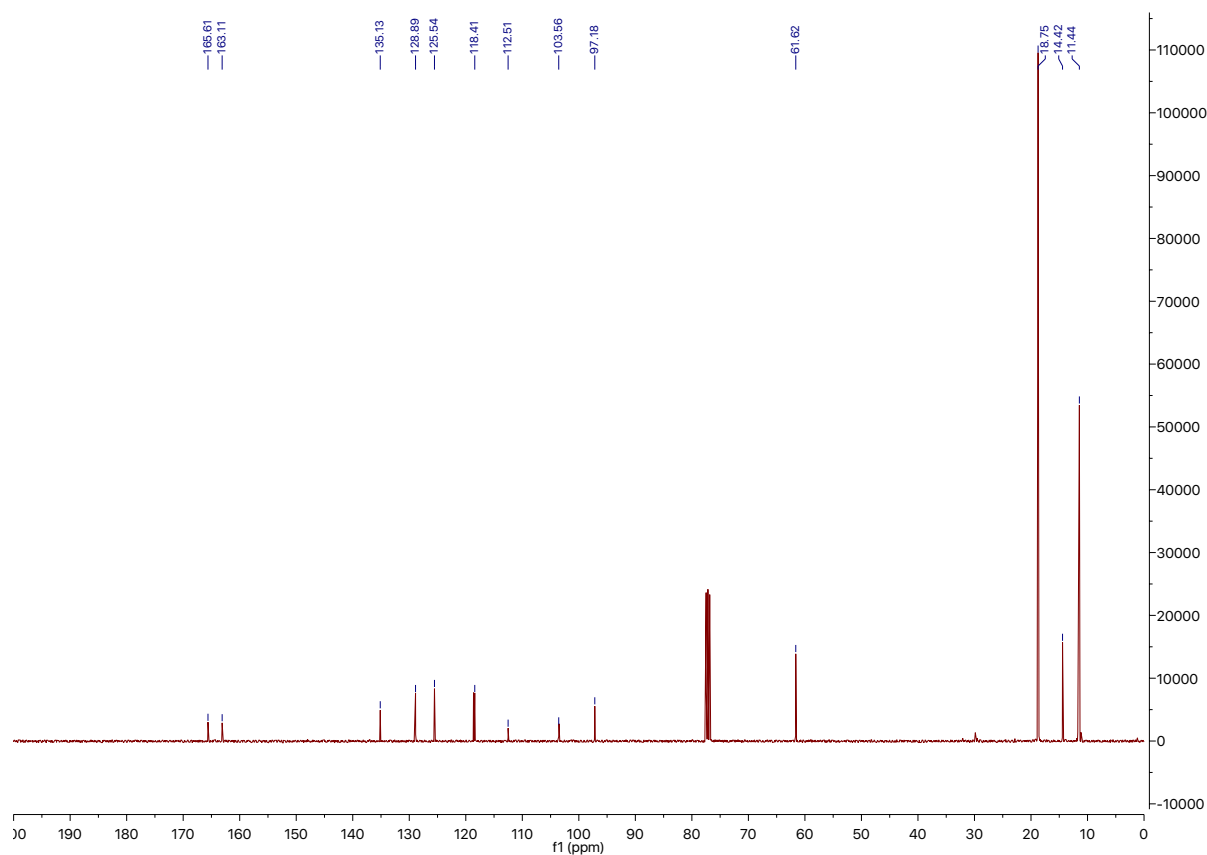



*Ethyl 3-fluoro-2,6-bis((triisopropylsilyl)ethynyl)benzoate (3j'')*

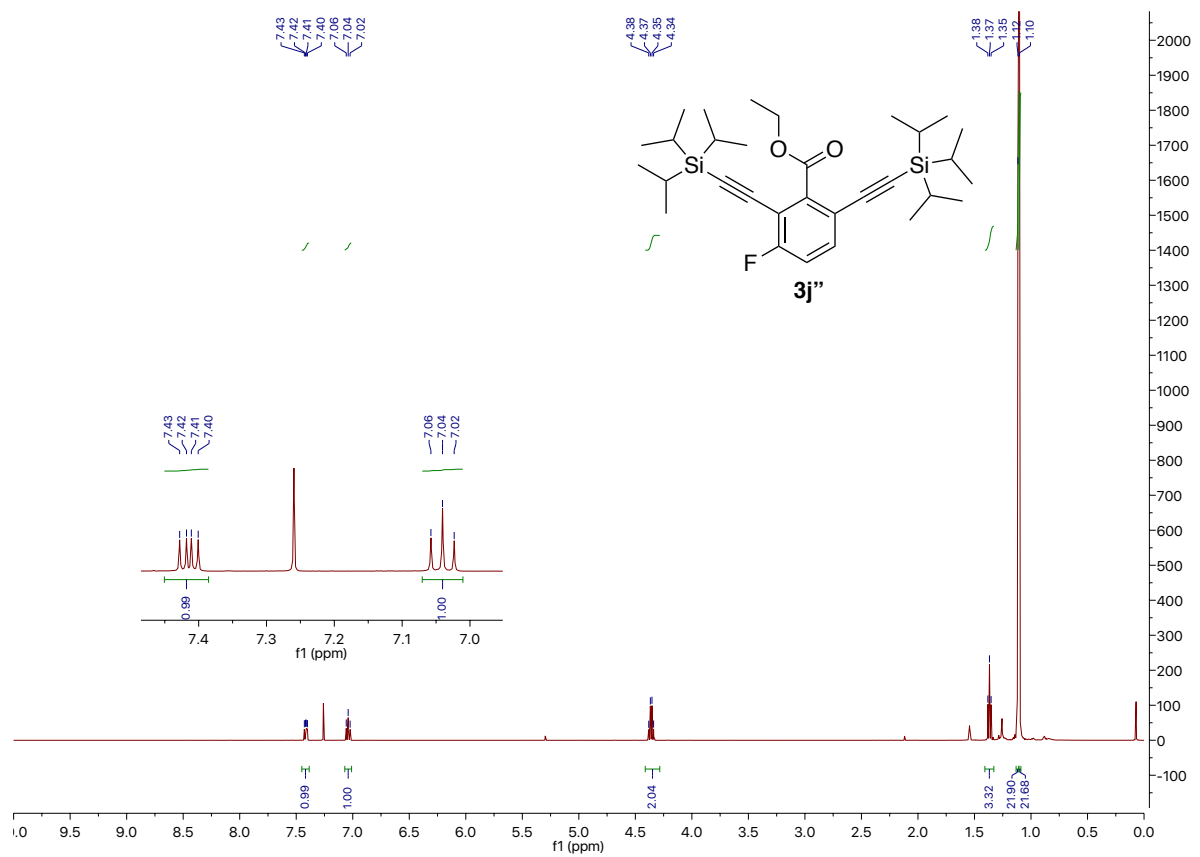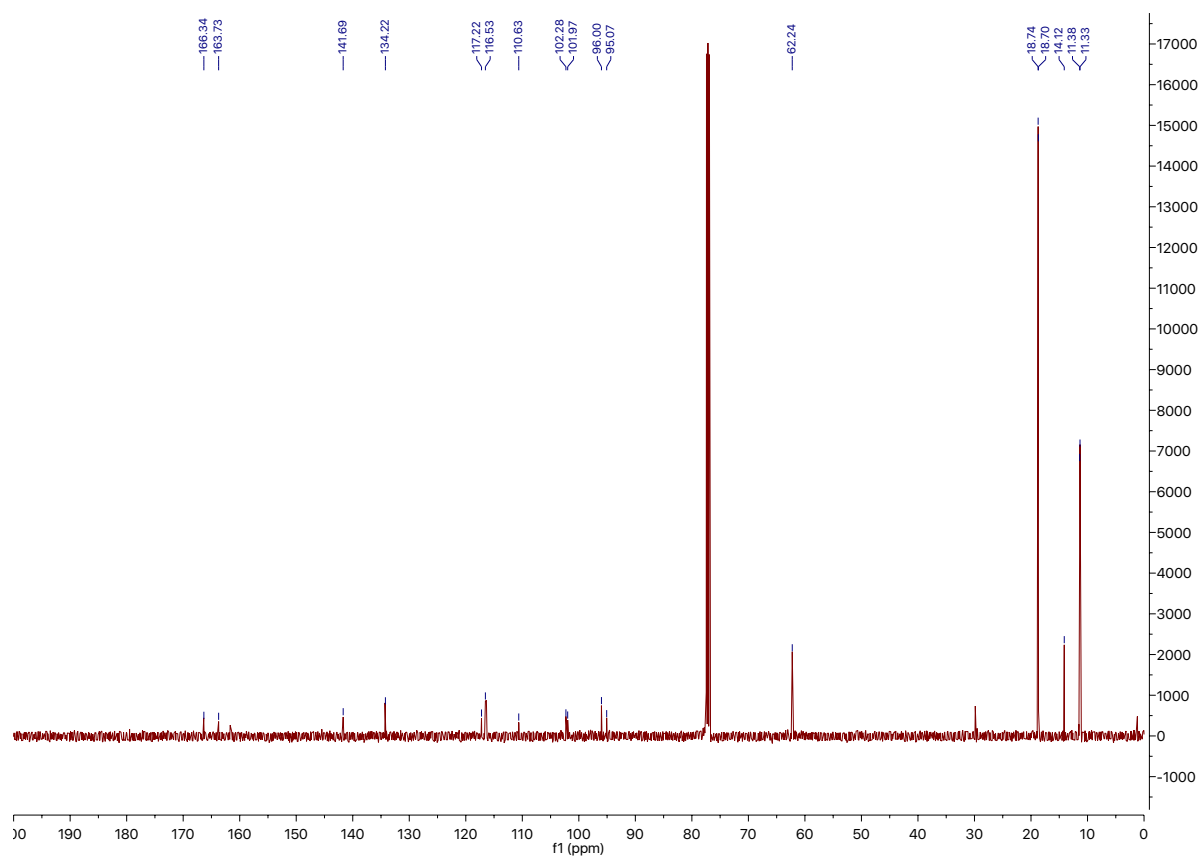

**Ethyl 5-bromo-2-((triisopropylsilyl)ethynyl)benzoate (3k)**

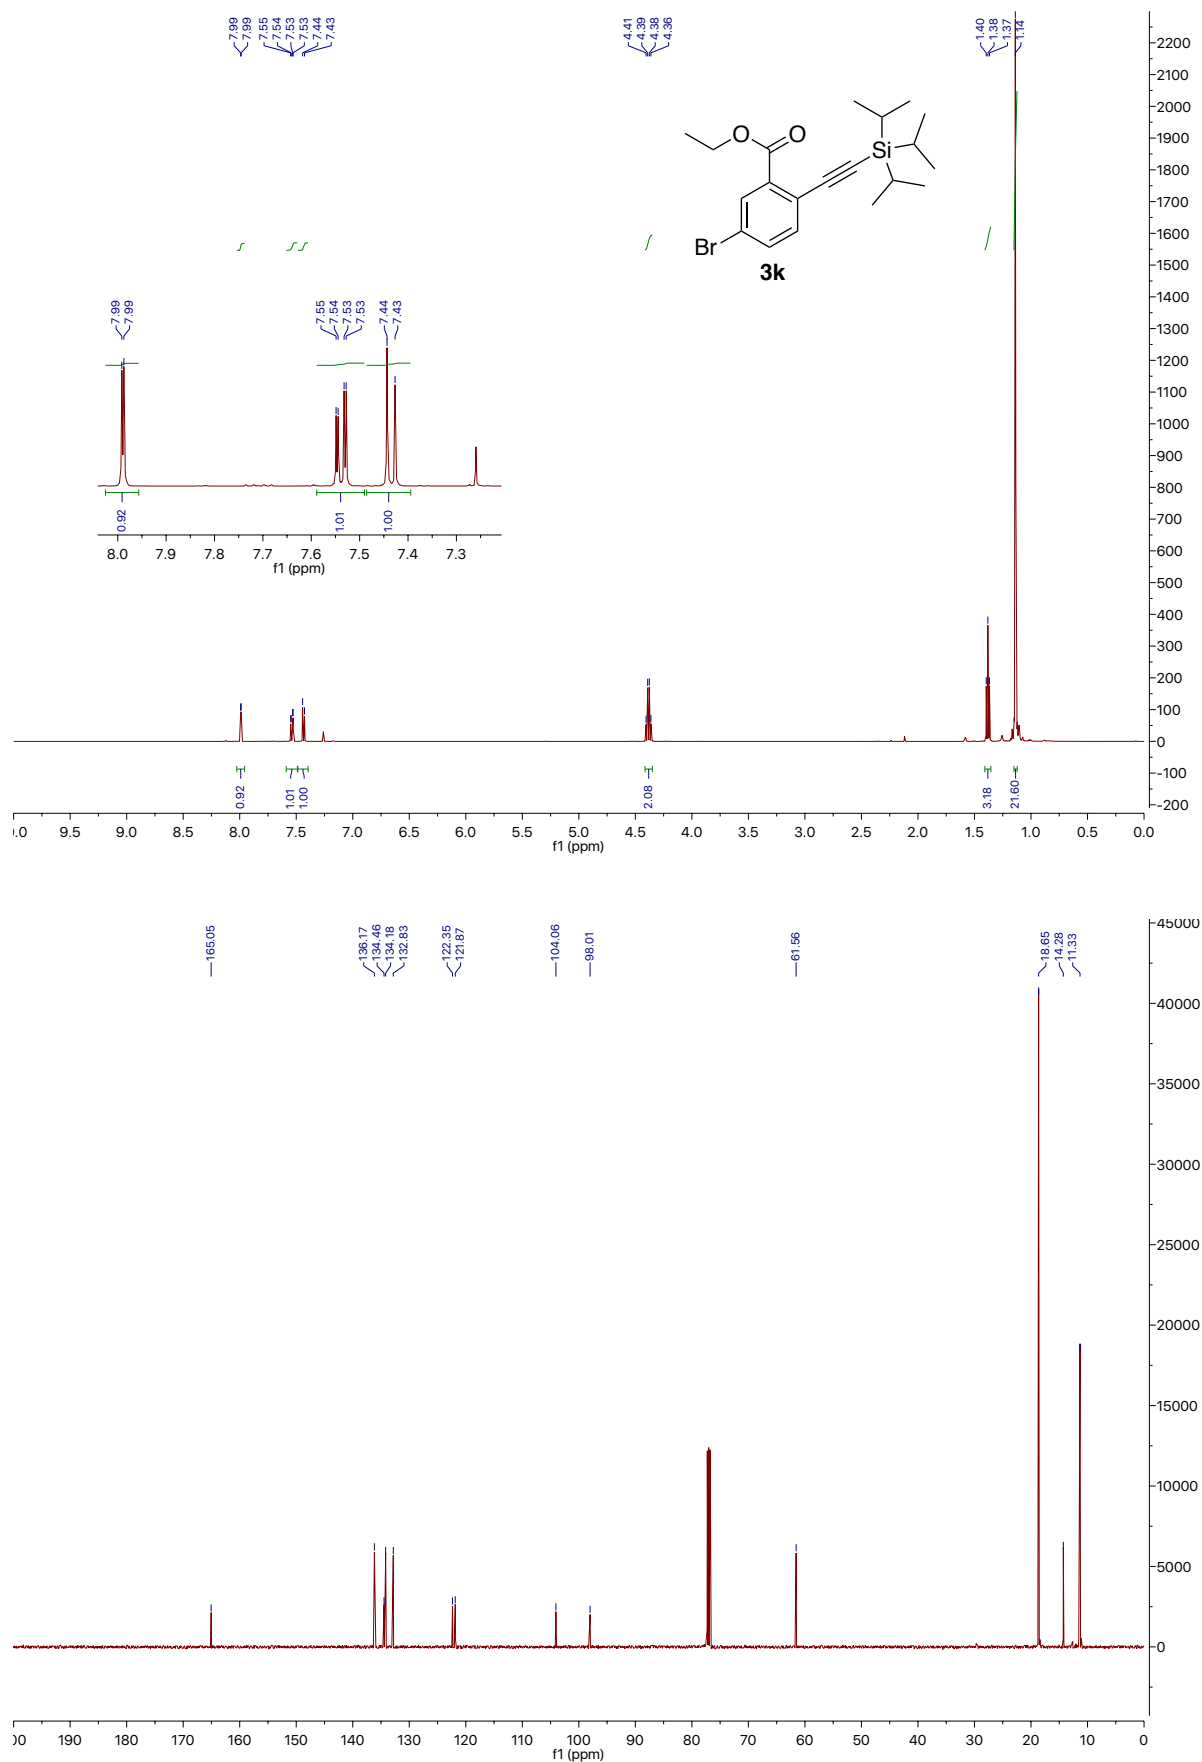

**Ethyl 3-bromo-2,6-bis((triisopropylsilyl)ethynyl)benzoate (3k'')**

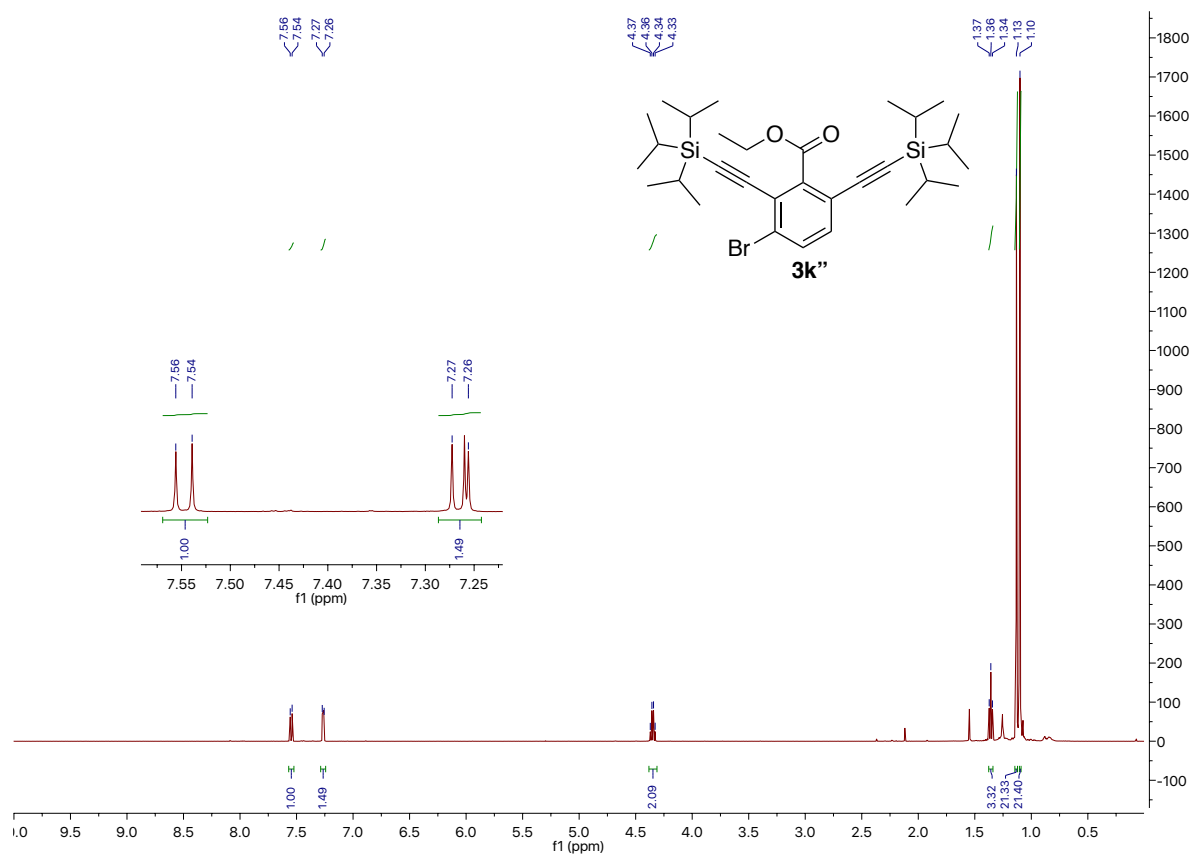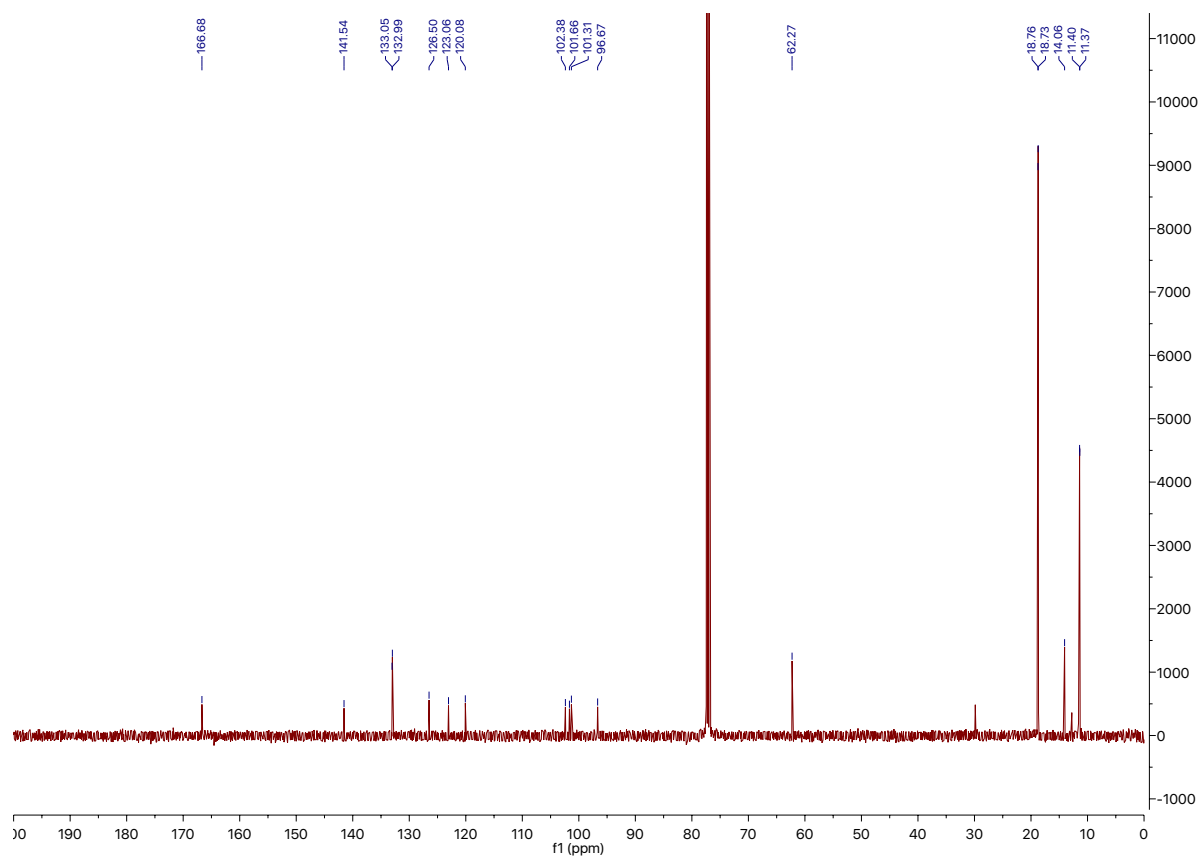



*Ethyl 3-methoxy-2-((triisopropylsilyl)ethynyl)benzoate (31')*

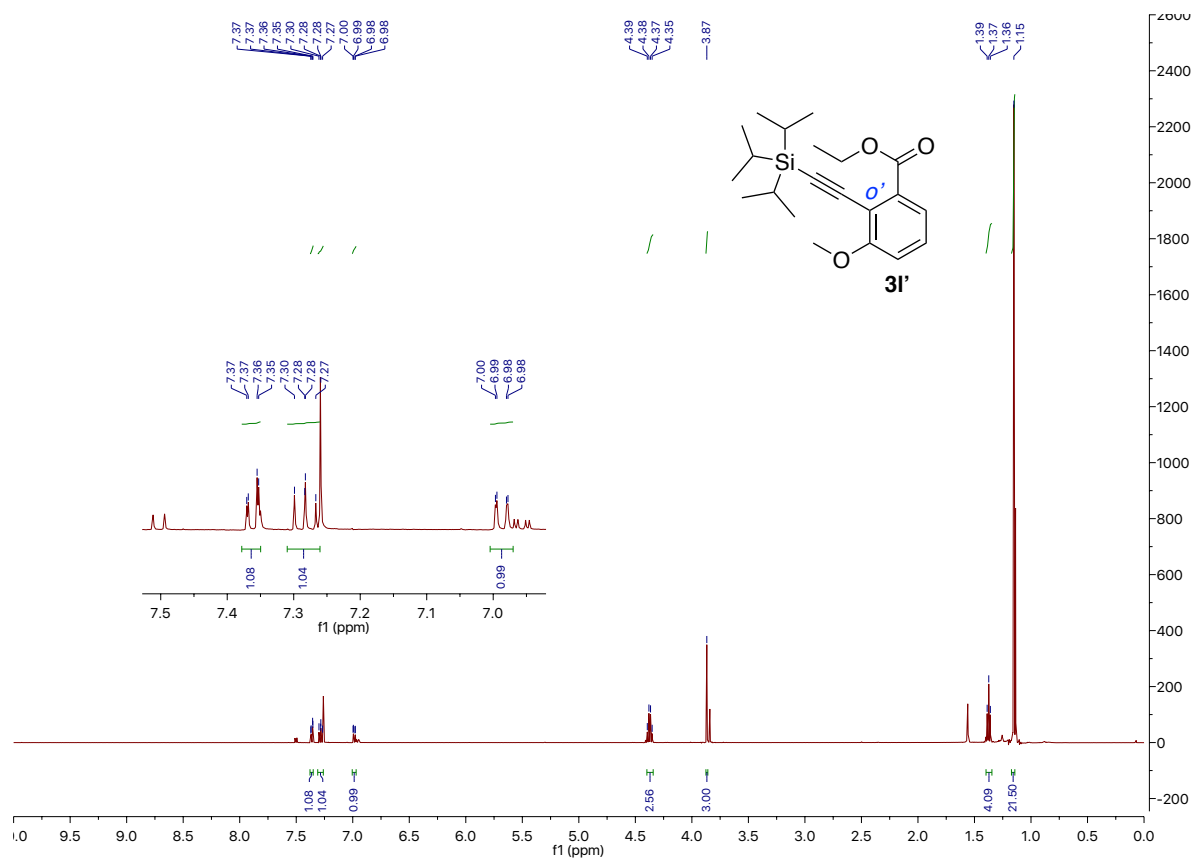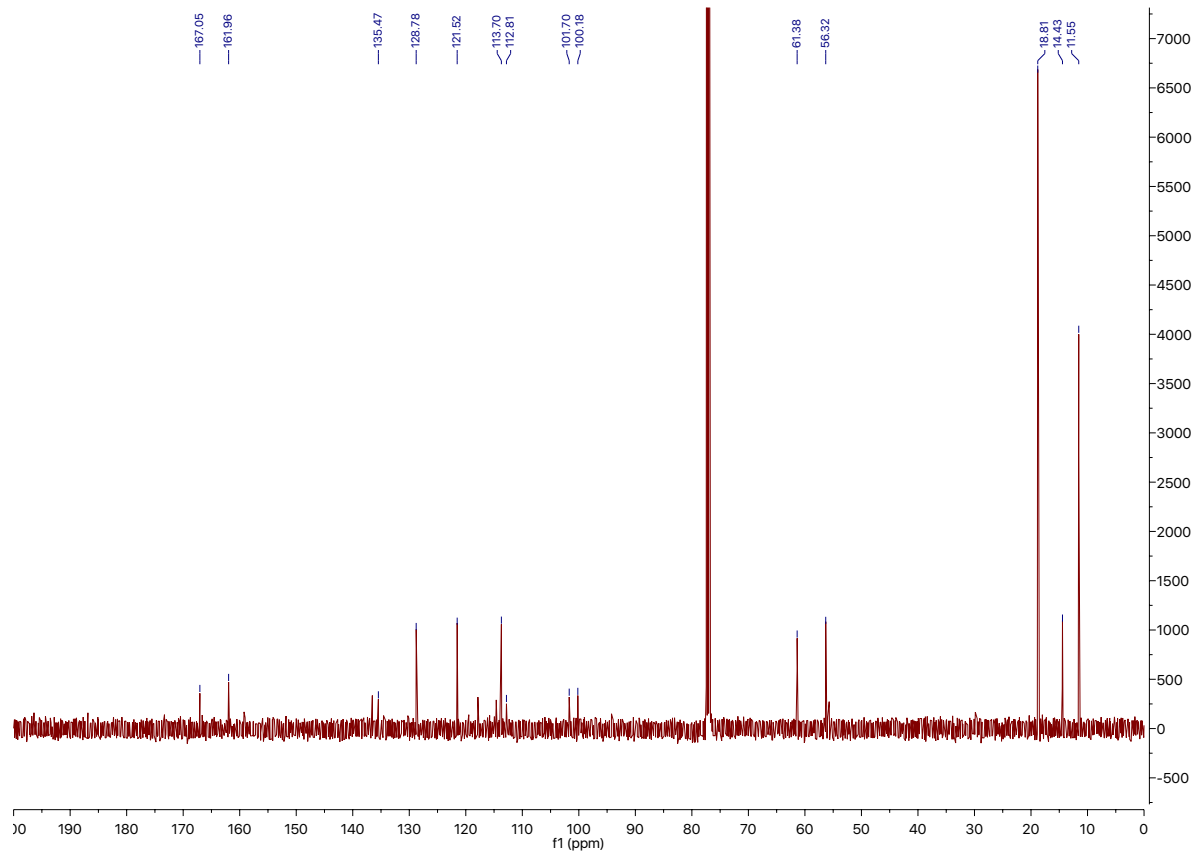

**Ethyl 5-methoxy-2-((triisopropylsilyl)ethynyl)benzoate (31)**

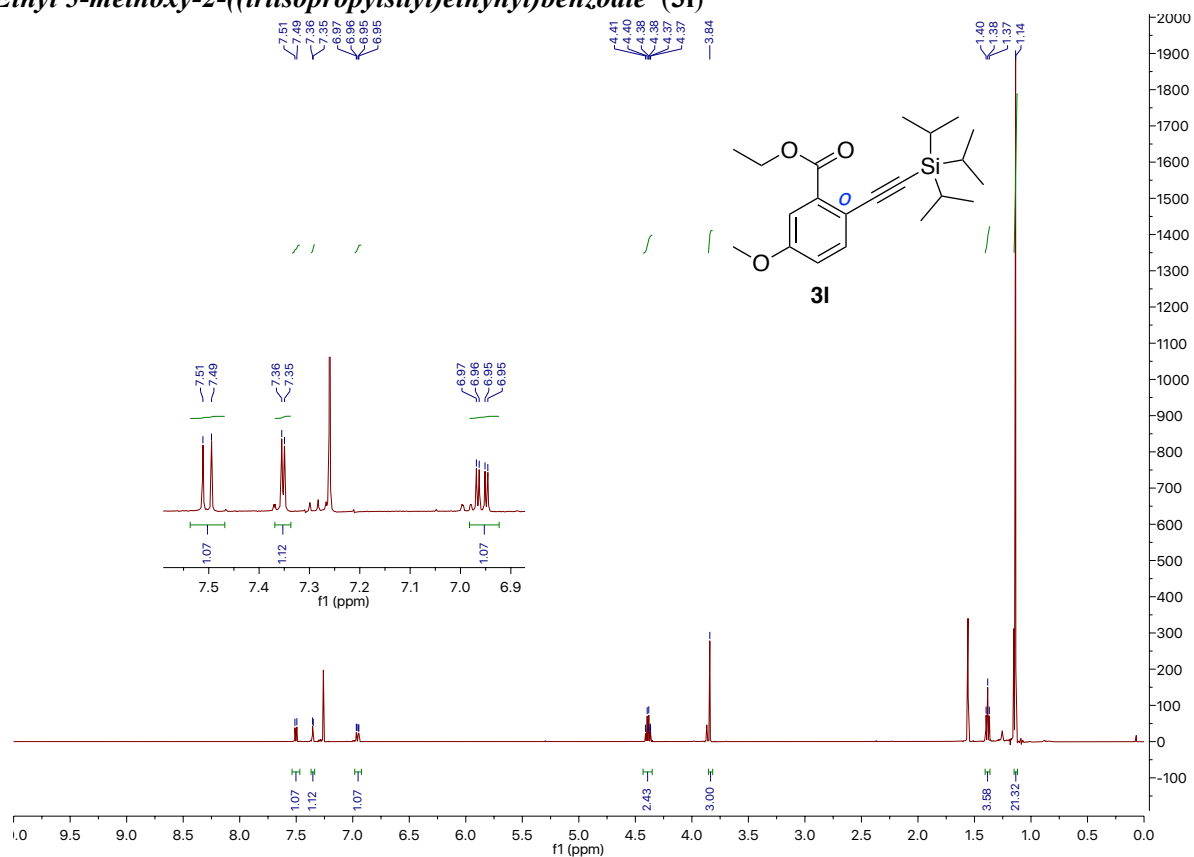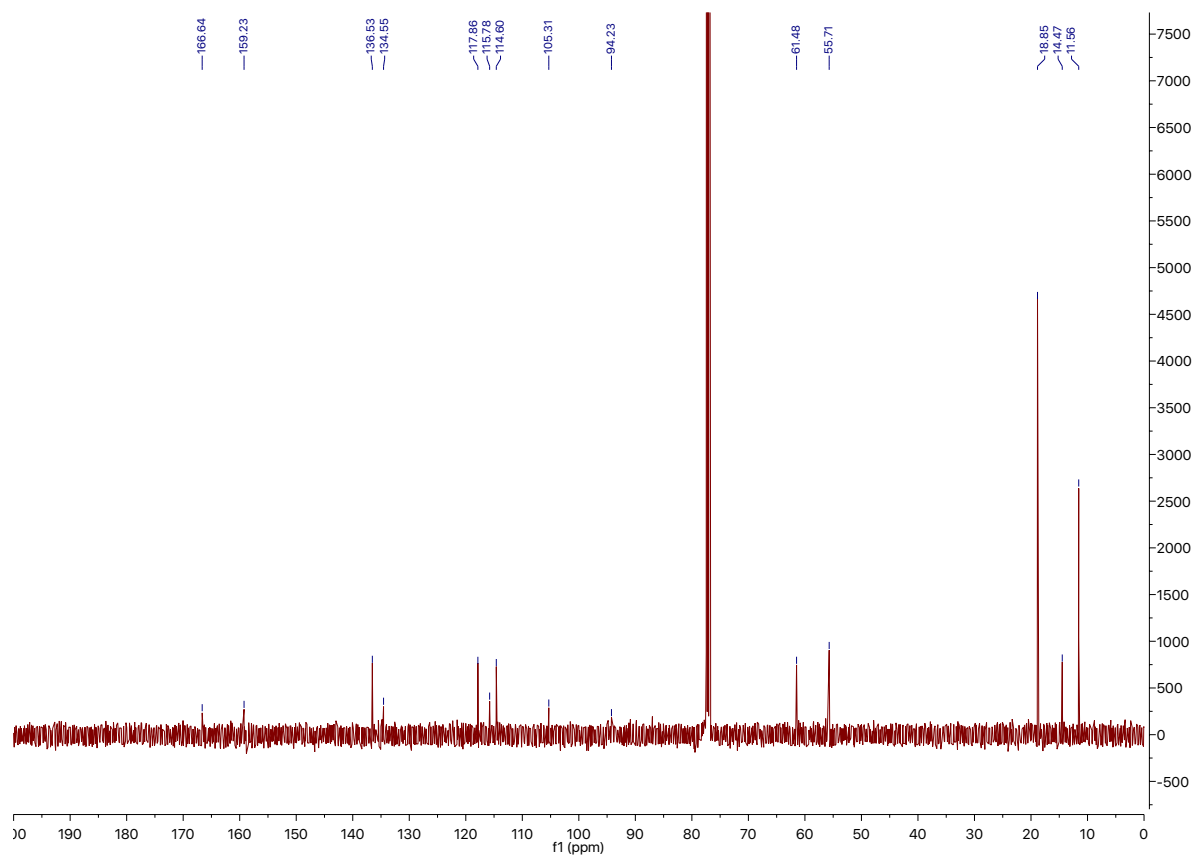

*Ethyl 3-methoxy-2,6-bis((triisopropylsilyl)ethynyl)benzoate (31'')*

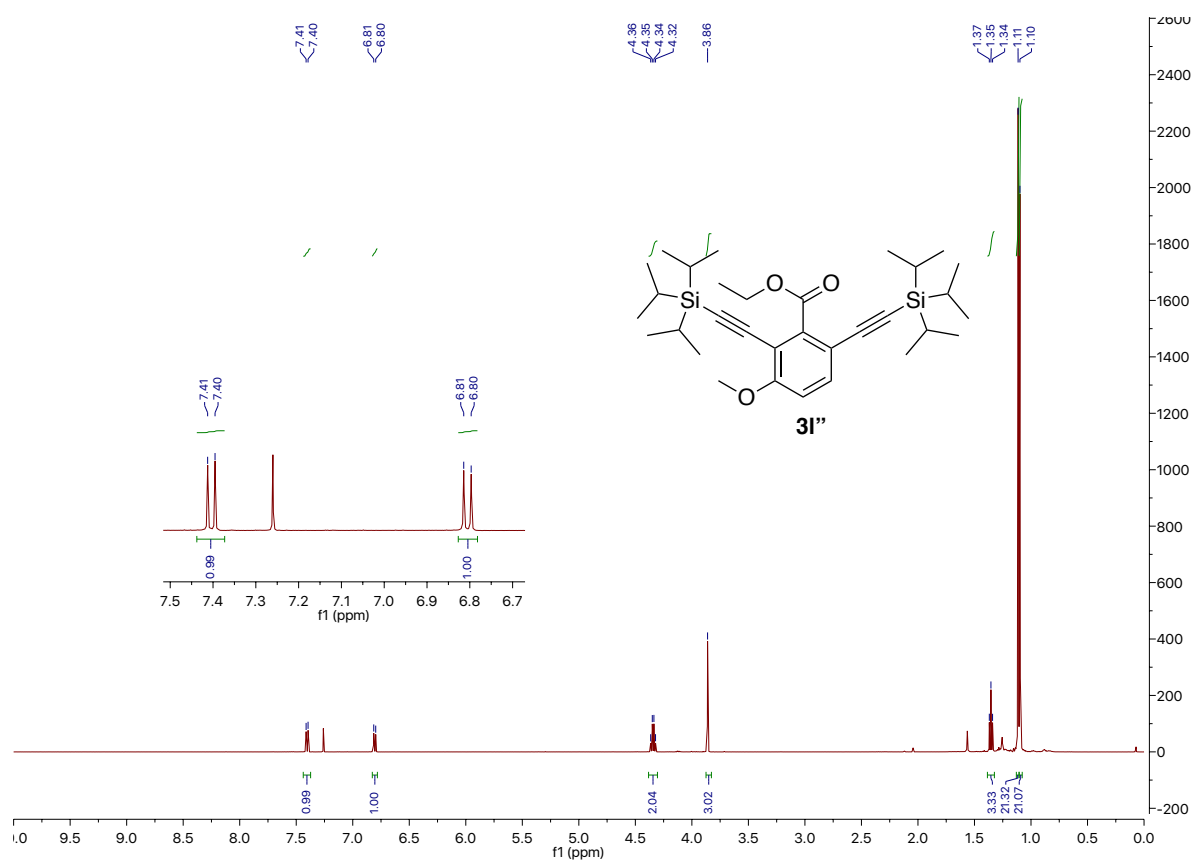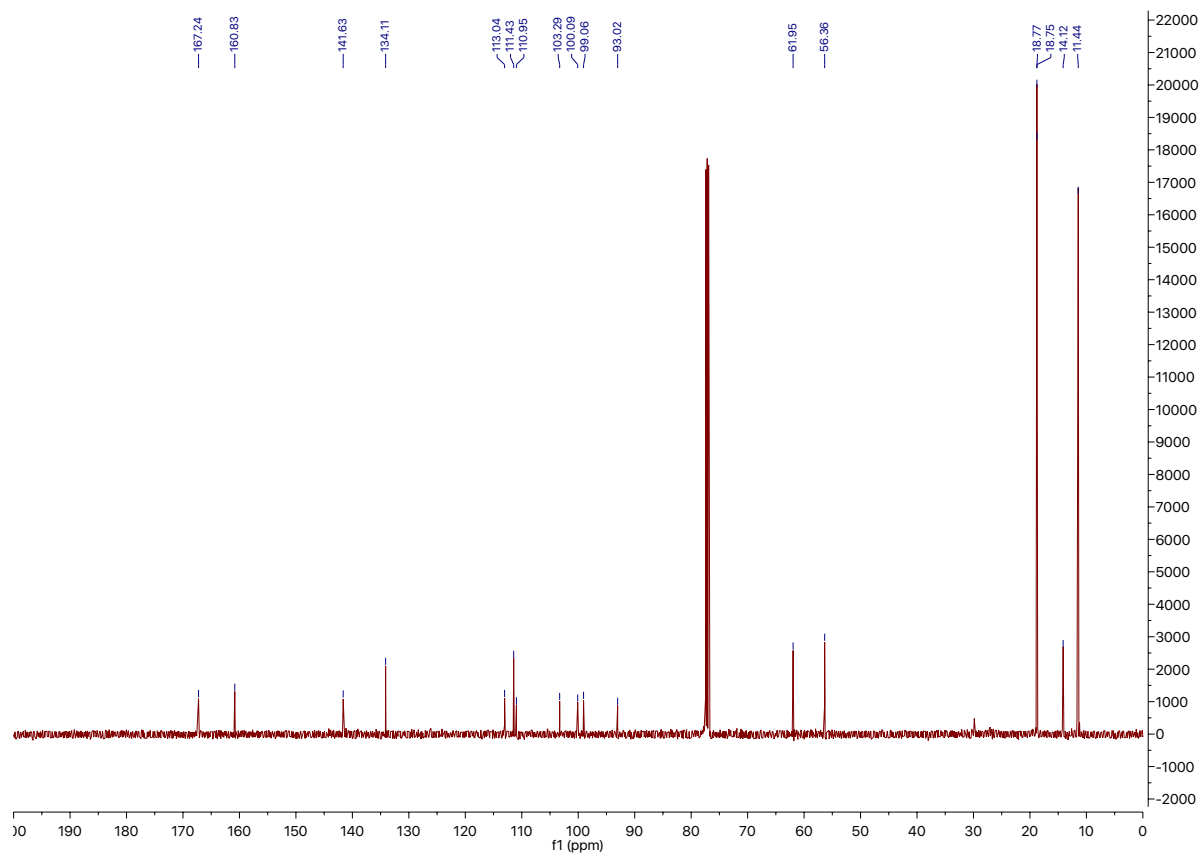

**Ethyl 5-(trifluoromethyl)-2-((triisopropylsilyl)ethynyl)benzoate (3m)**

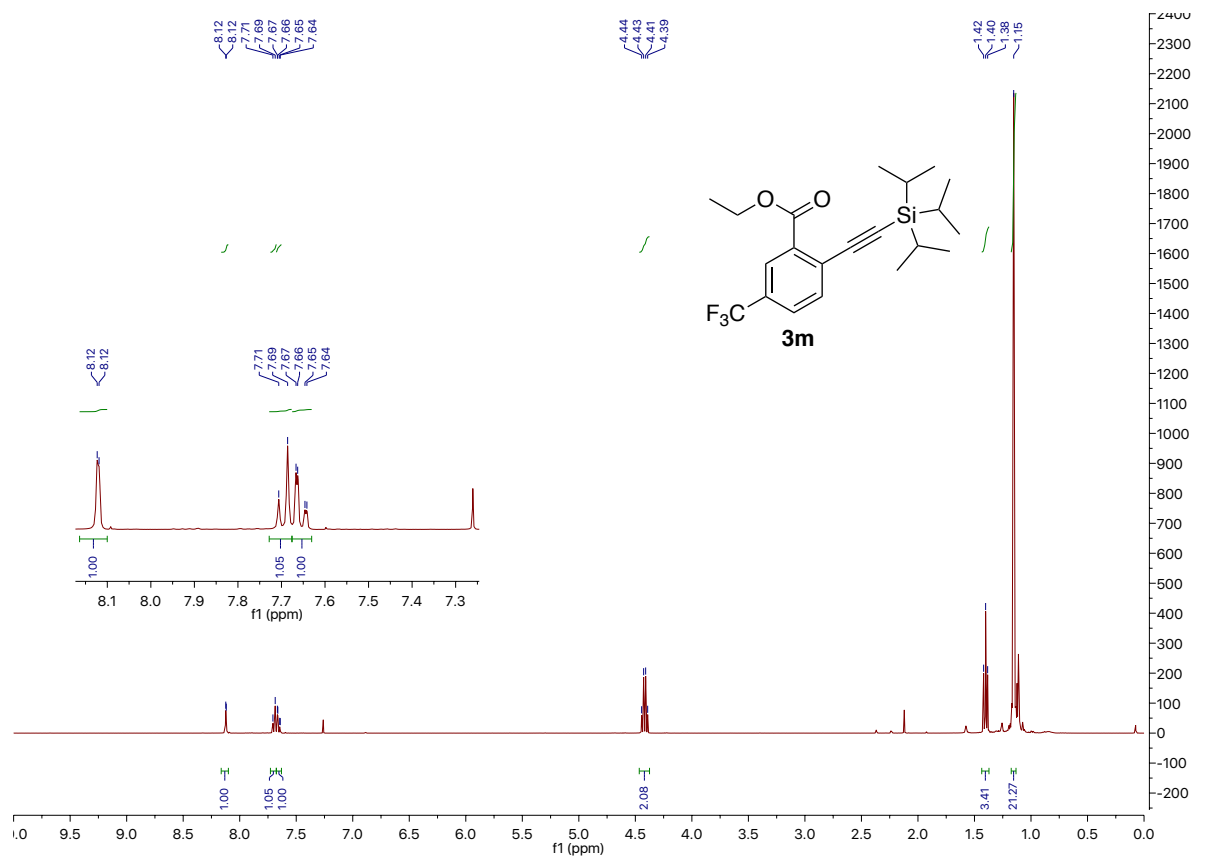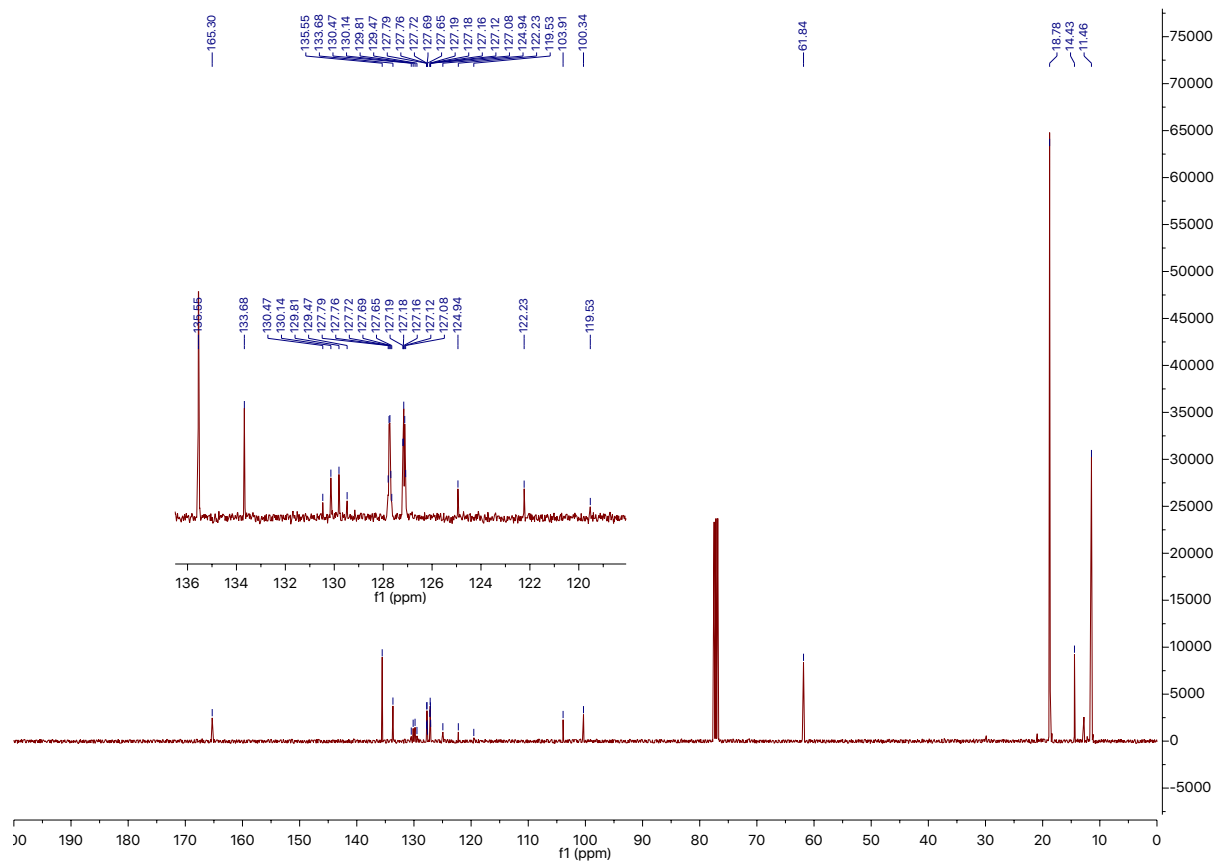

**Ethyl 4-methyl-2-((triisopropylsilyl)ethynyl)benzoate (3n)**

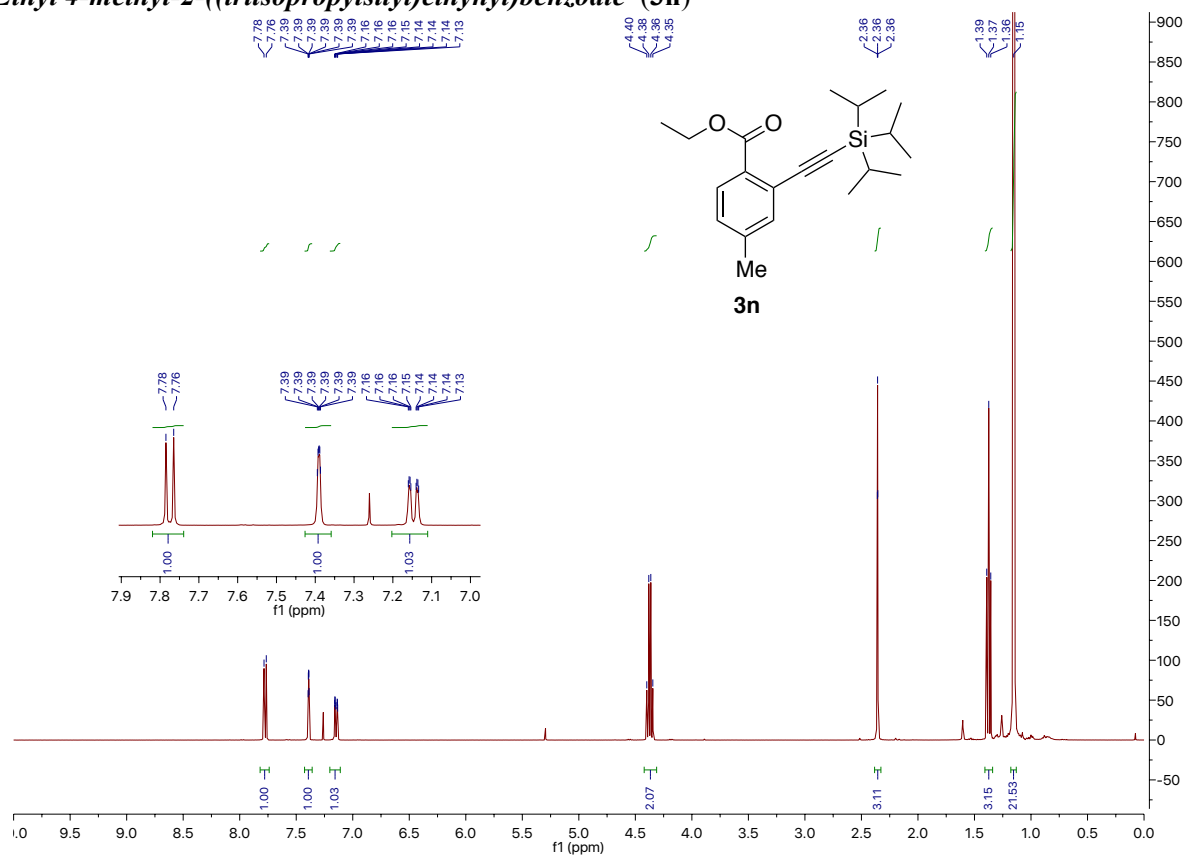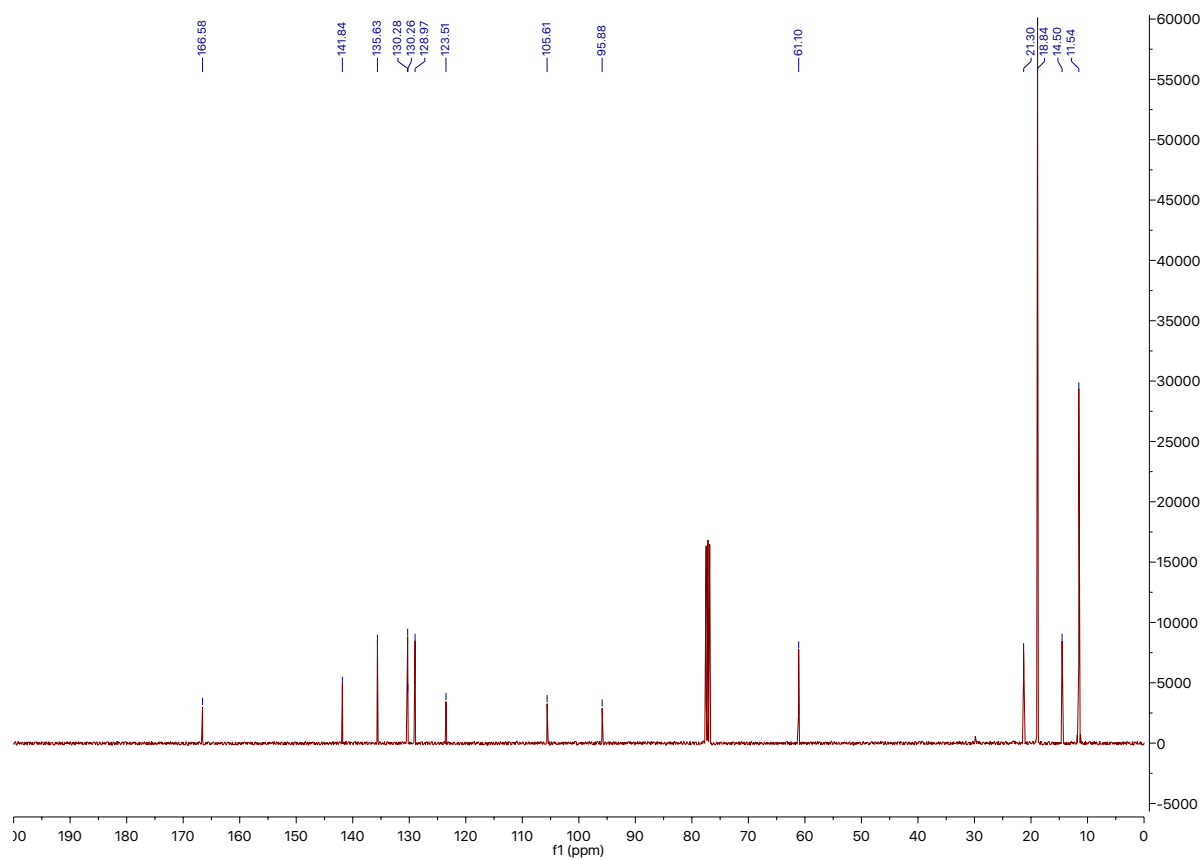

**Ethyl 4-methyl-2,6-bis((triisopropylsilyl)ethynyl)benzoate (3n'')**

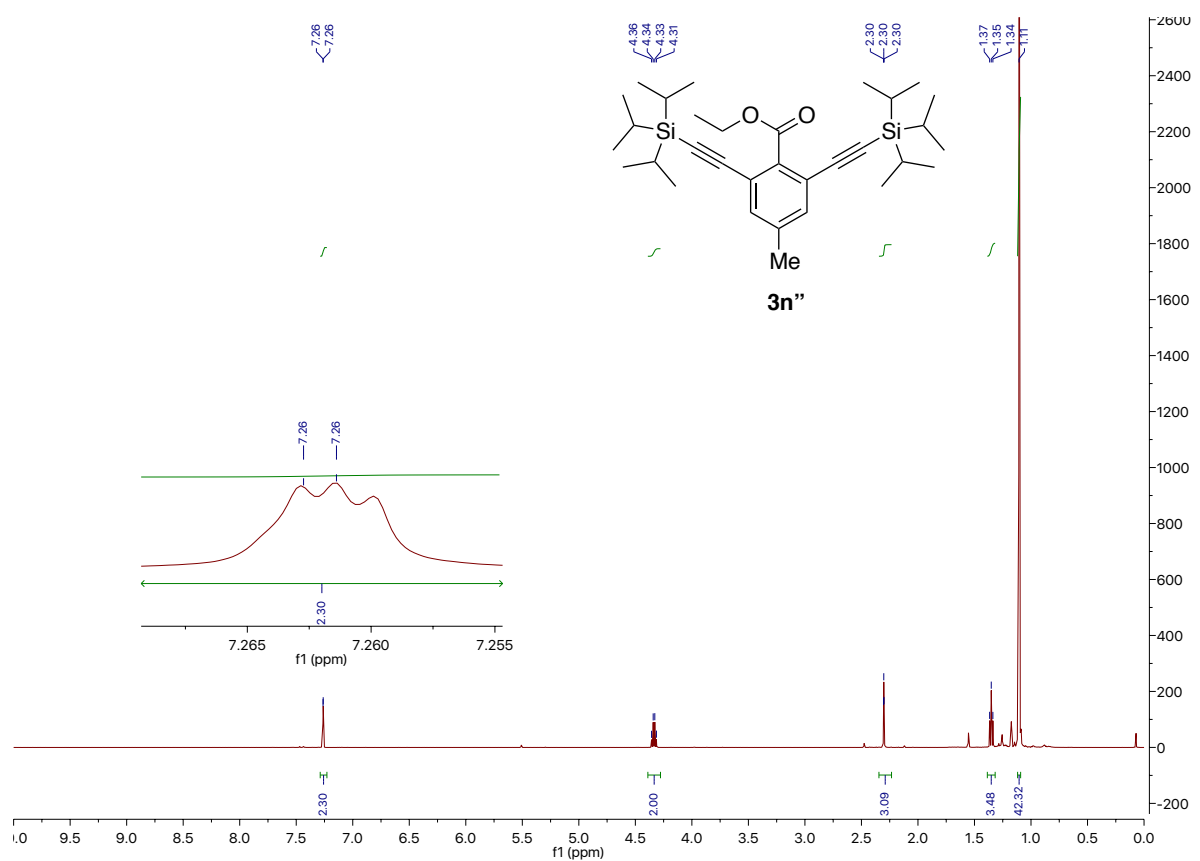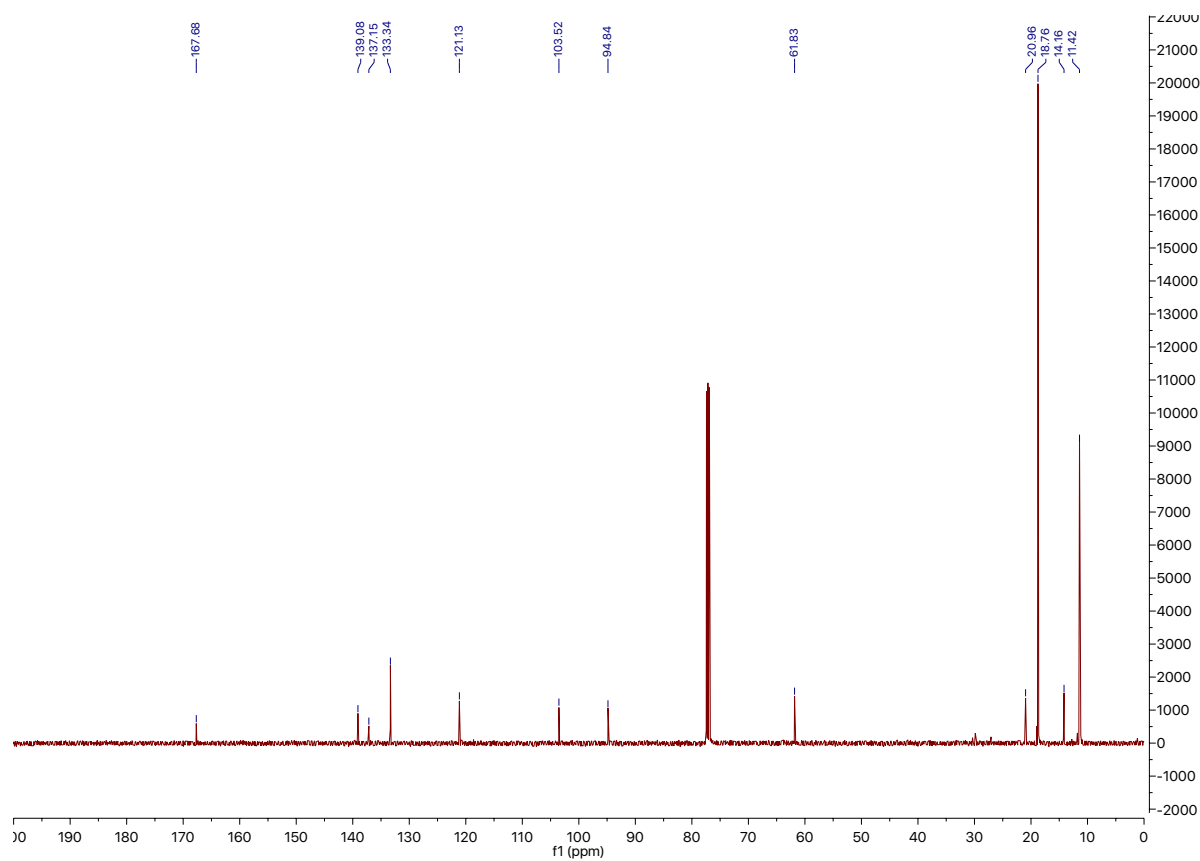

*Ethyl 4-(tert-butyl)-2-((triisopropylsilyl)ethynyl)benzoate (3o)*

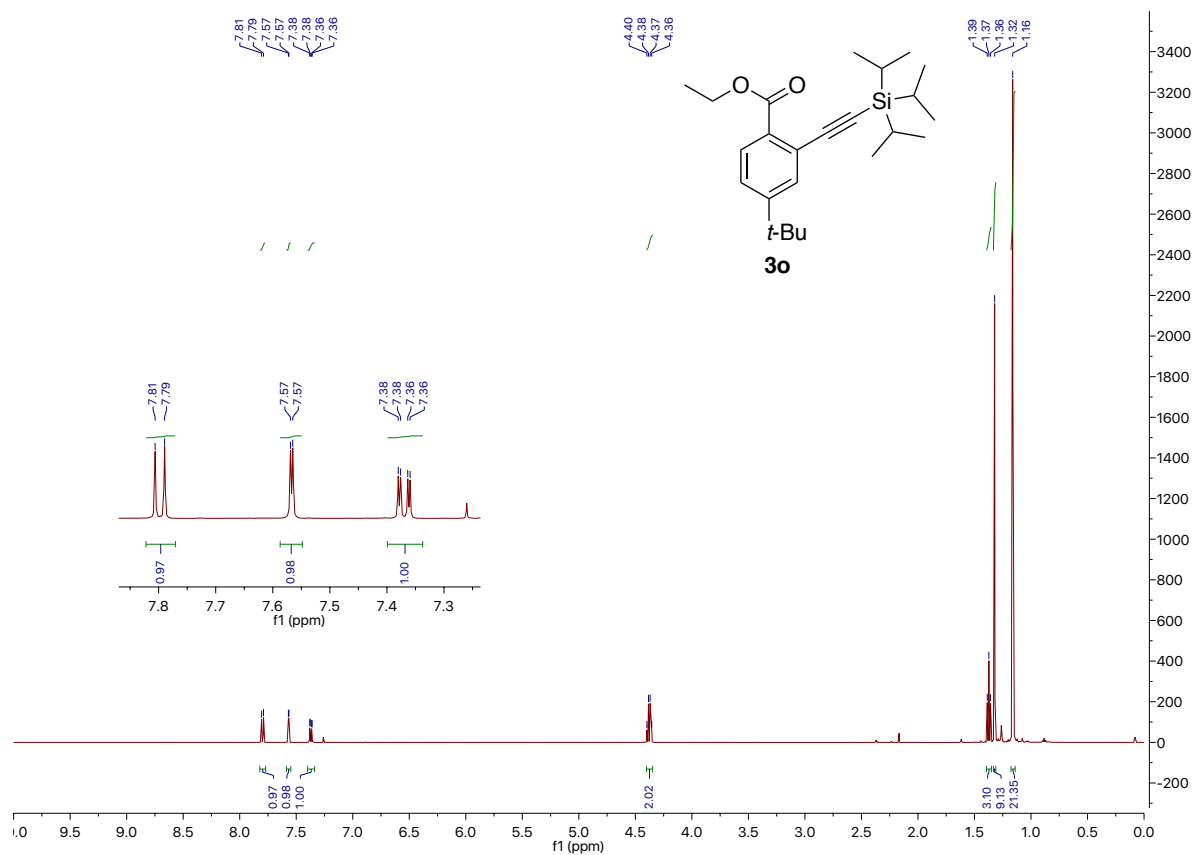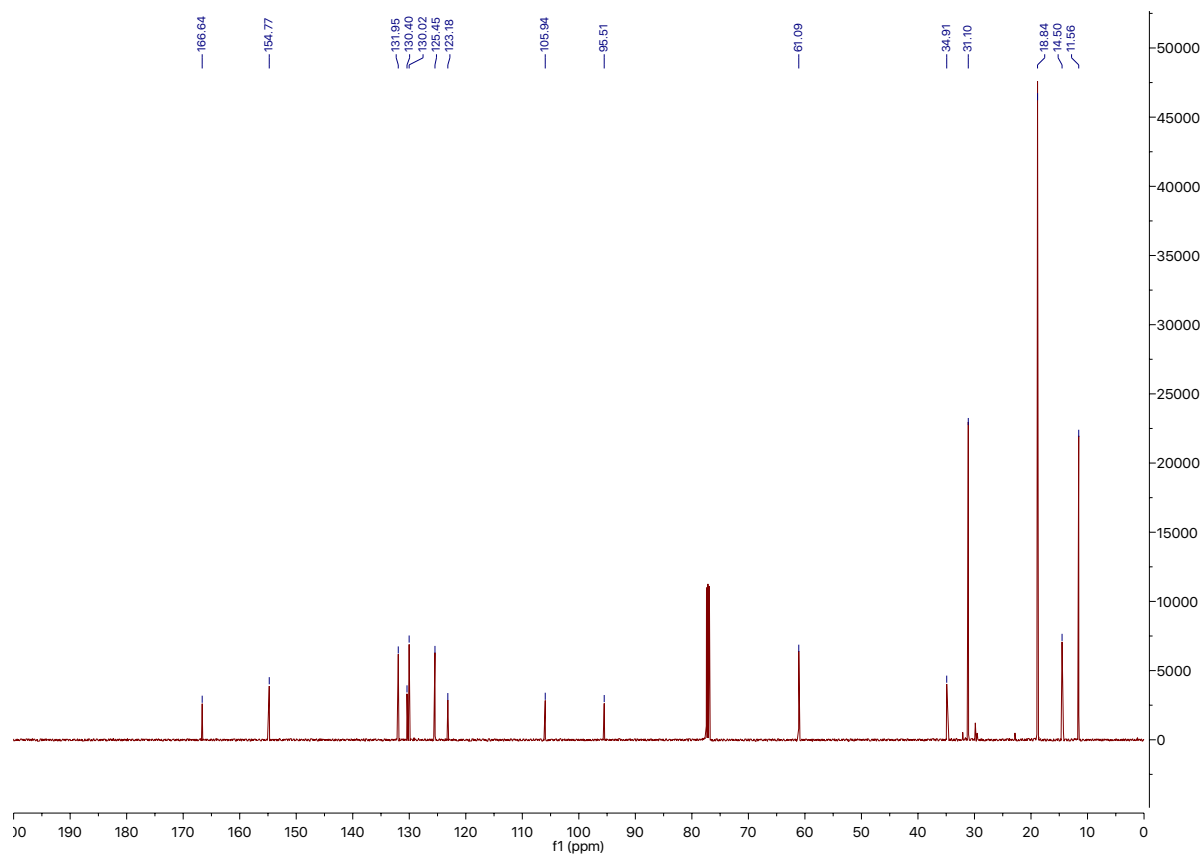

**Ethyl 4-(tert-butyl)-2,6-bis((triisopropylsilyl)ethynyl)benzoate (3o'')**

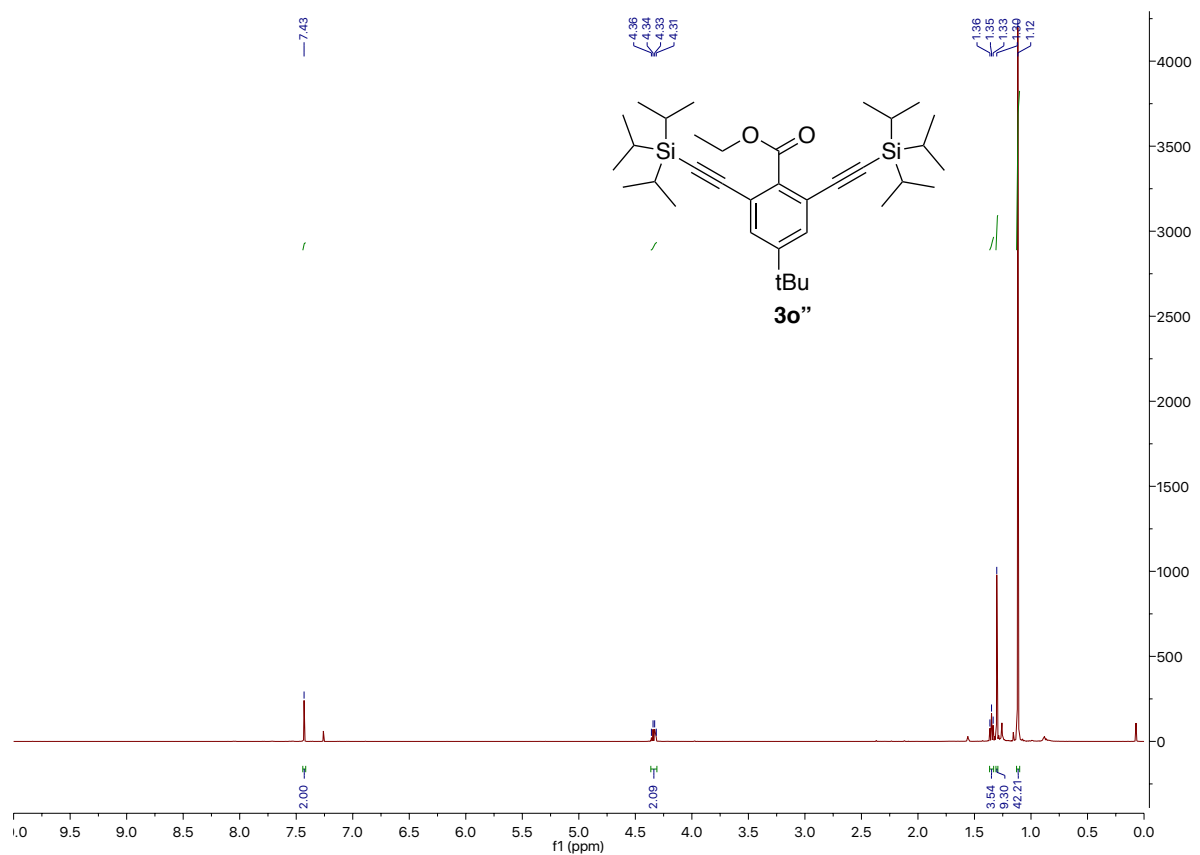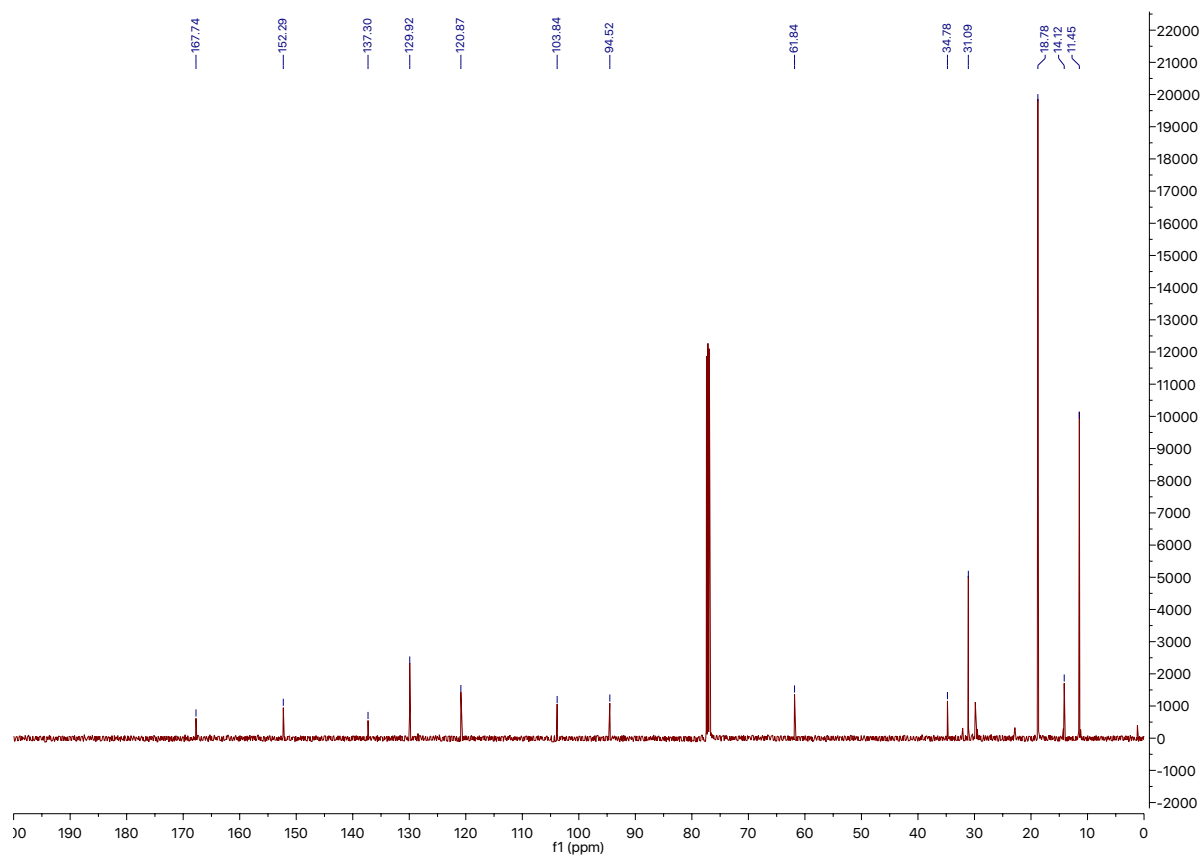



**Ethyl 4-fluoro-2-((triisopropylsilyl)ethynyl)benzoate (3p)**

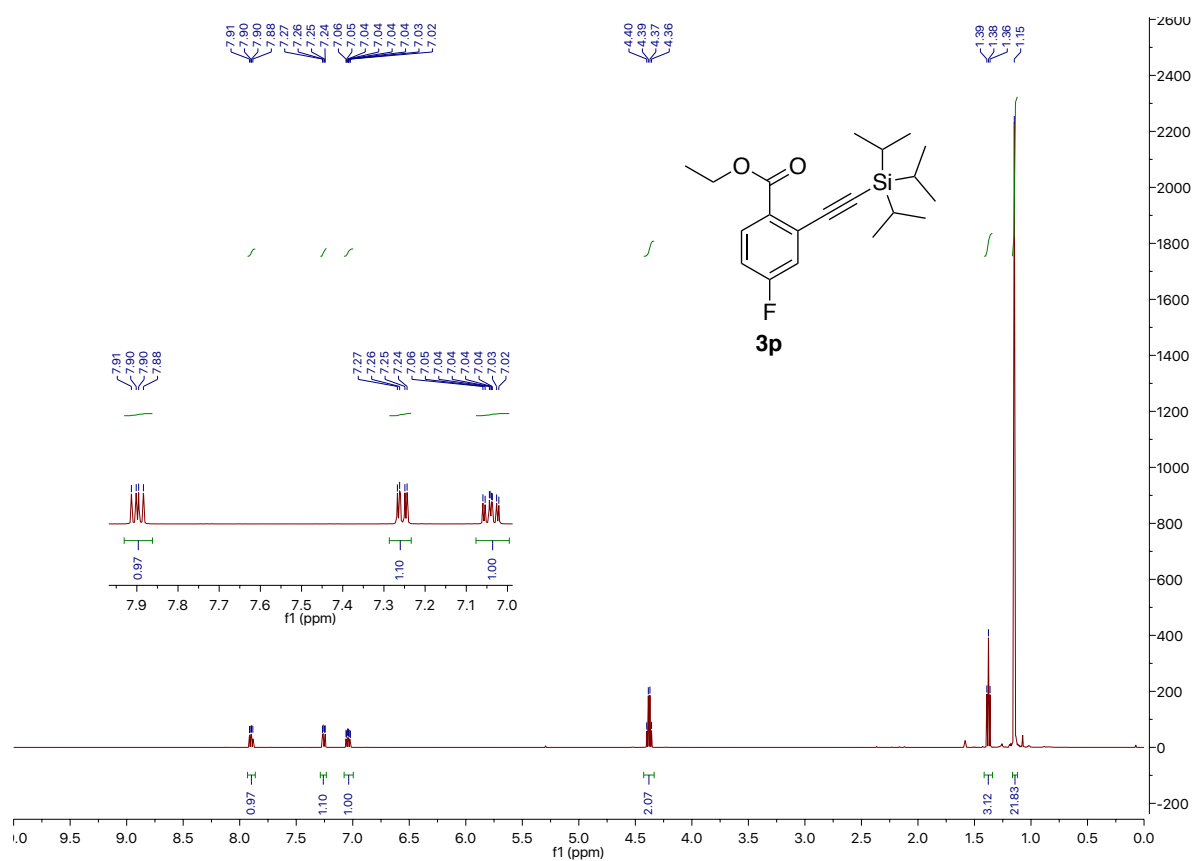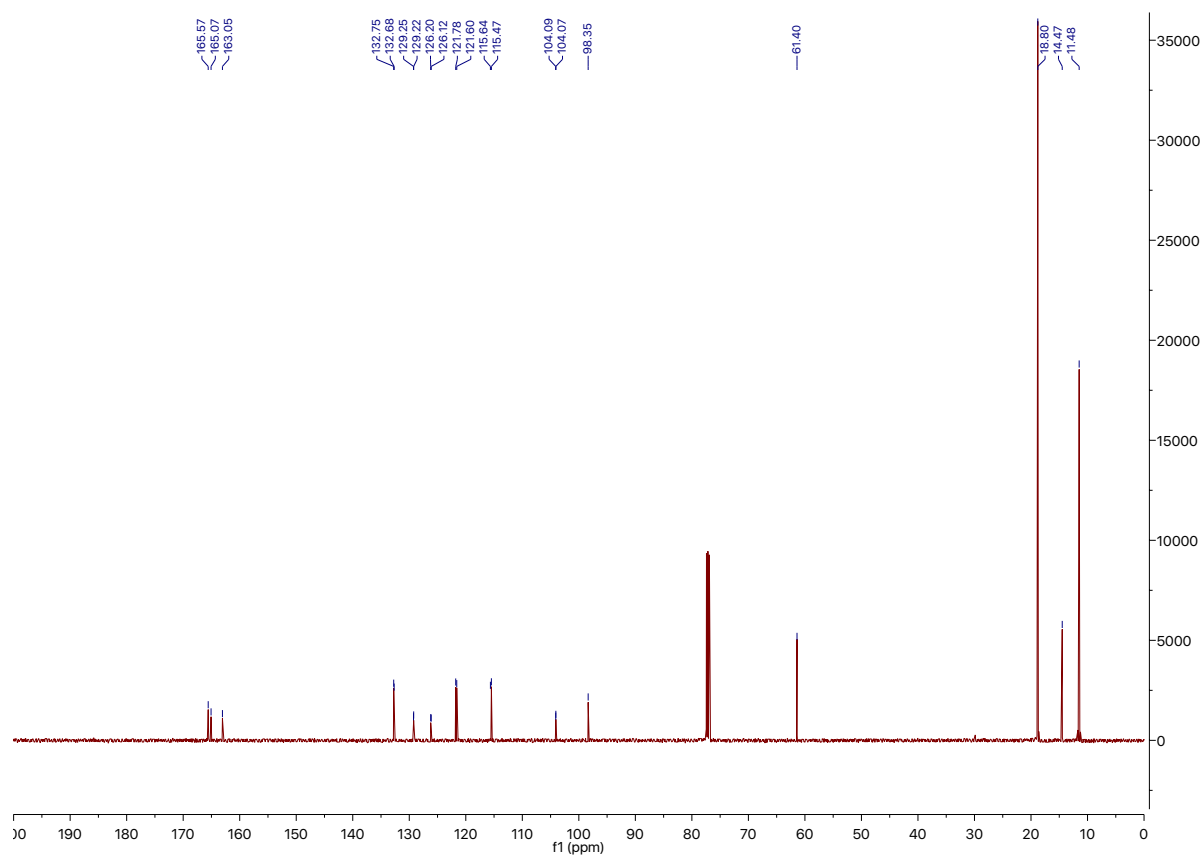

**Ethyl 4-methoxy-2-((triisopropylsilyl)ethynyl)benzoate (3q)**

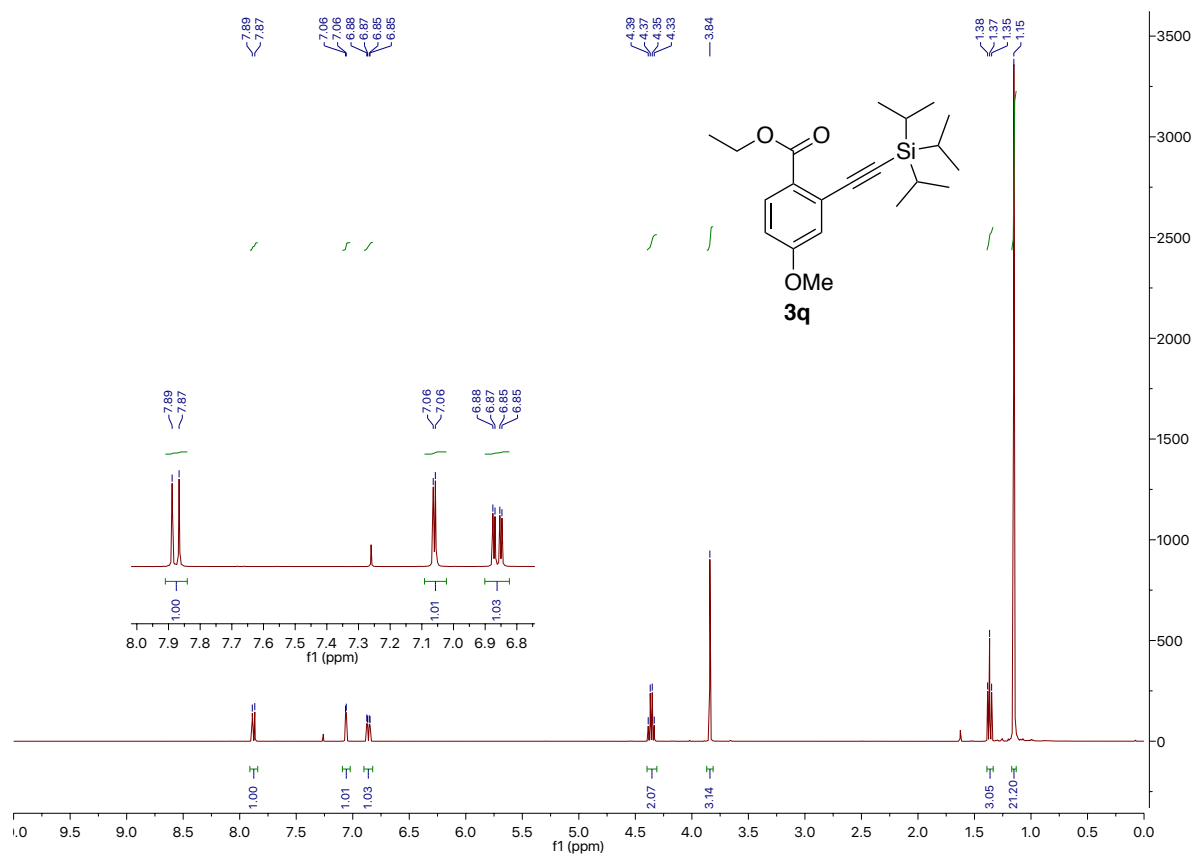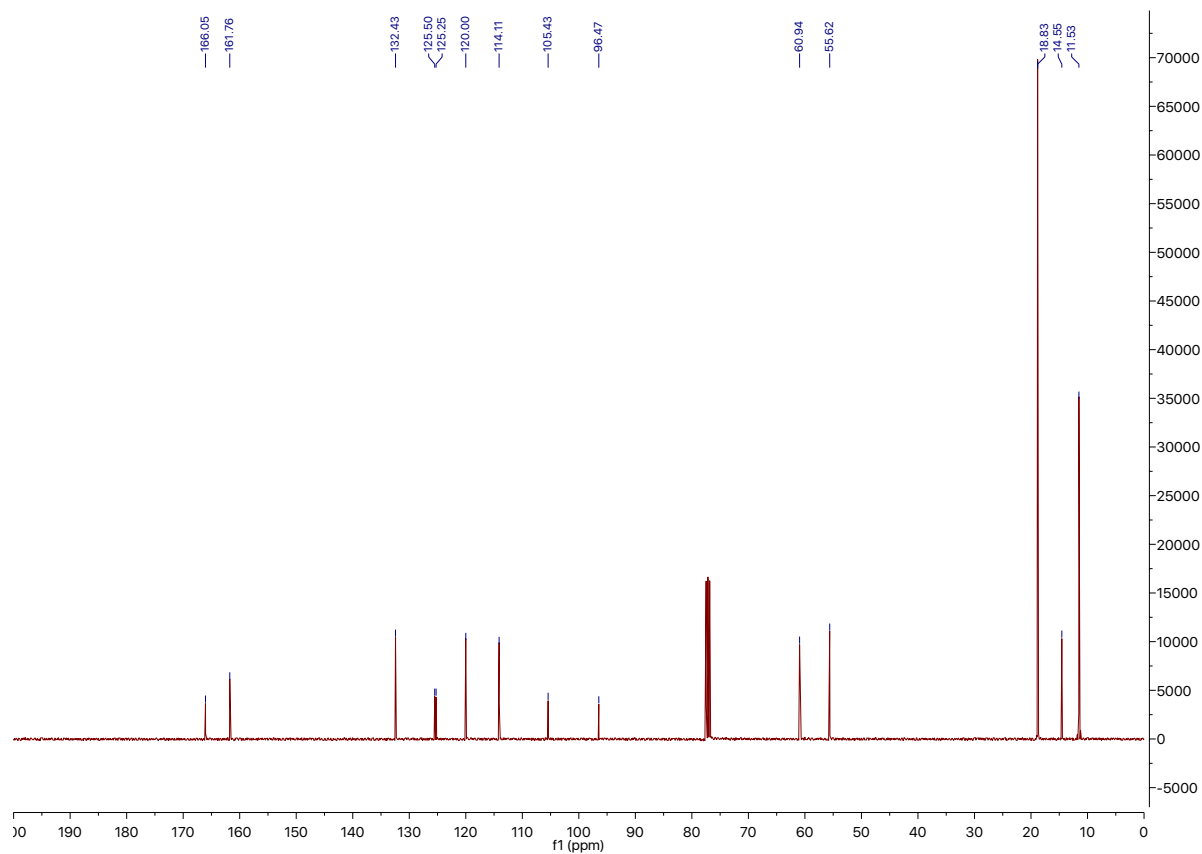

**Ethyl 4-methoxy-2,6-bis((triisopropylsilyl)ethynyl)benzoate (3q'')**

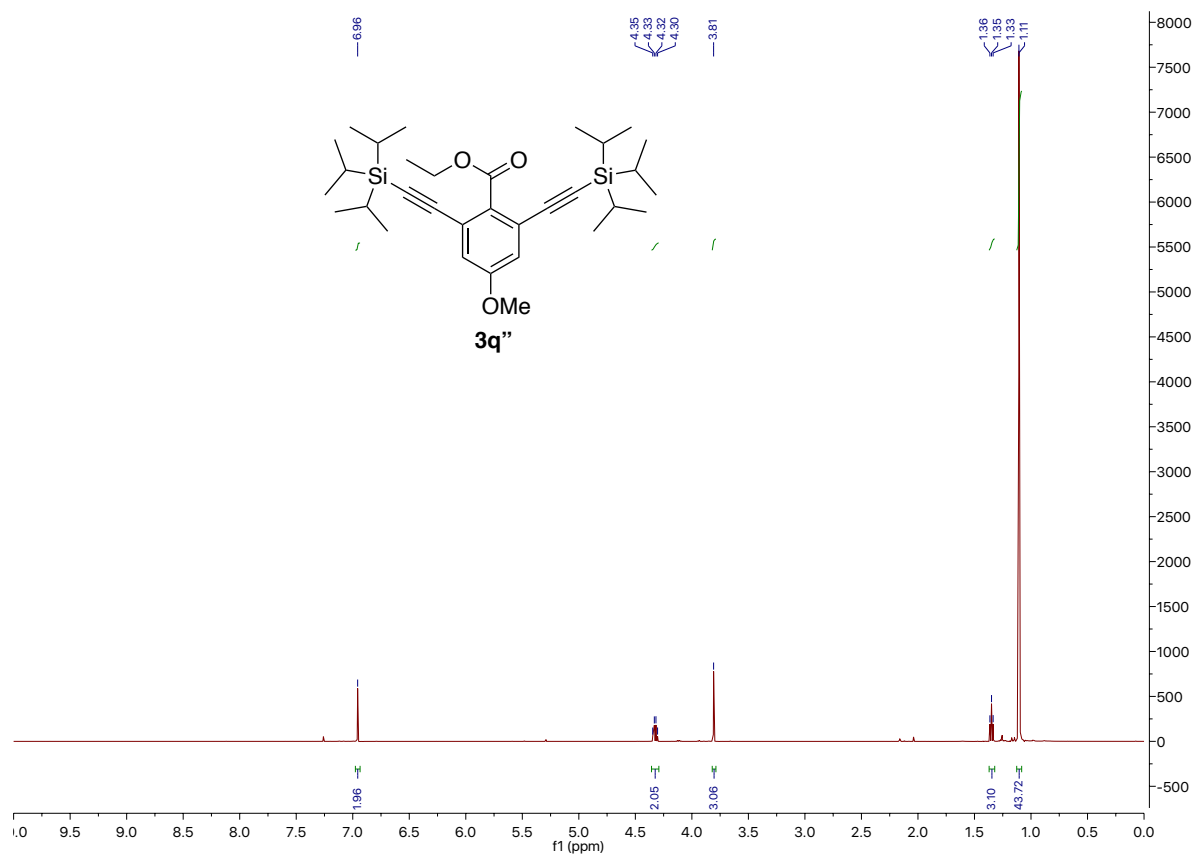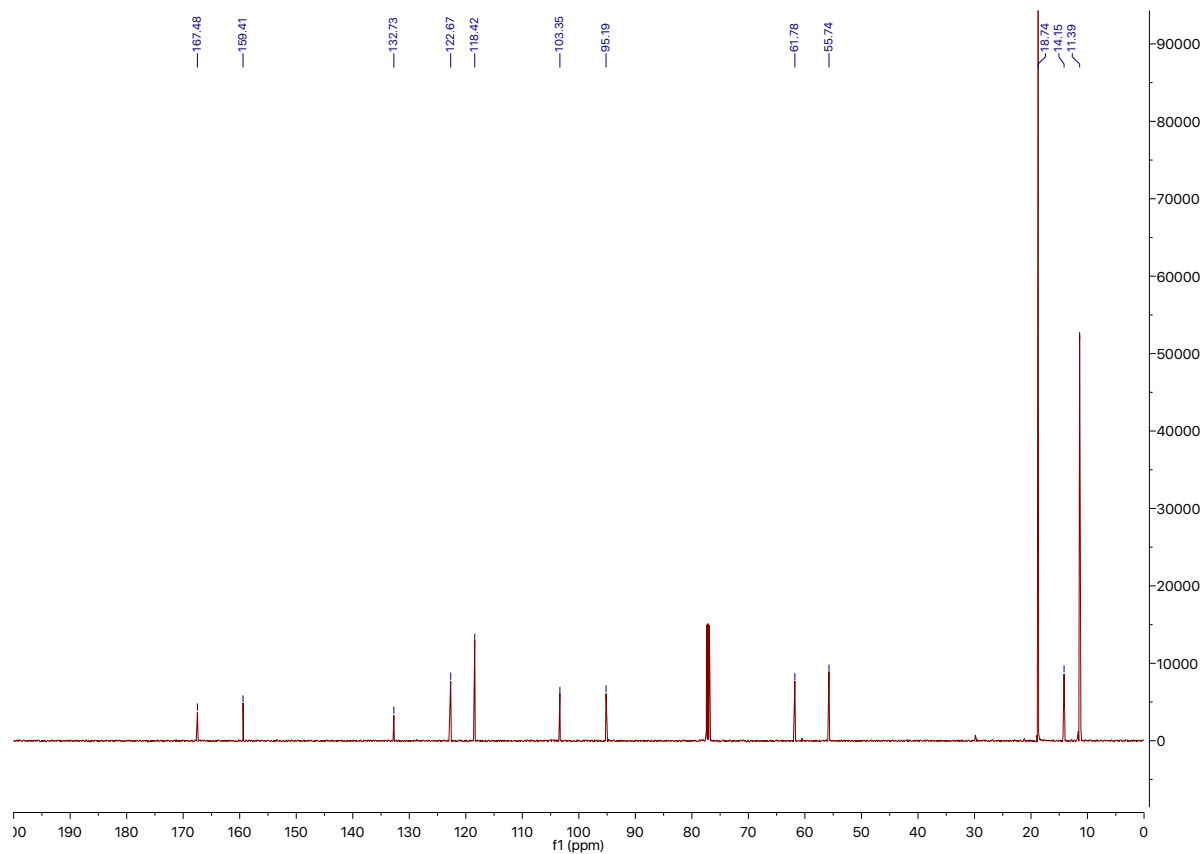

**Ethyl 4-hydroxy-2-((triisopropylsilyl)ethynyl)benzoate (3r)**

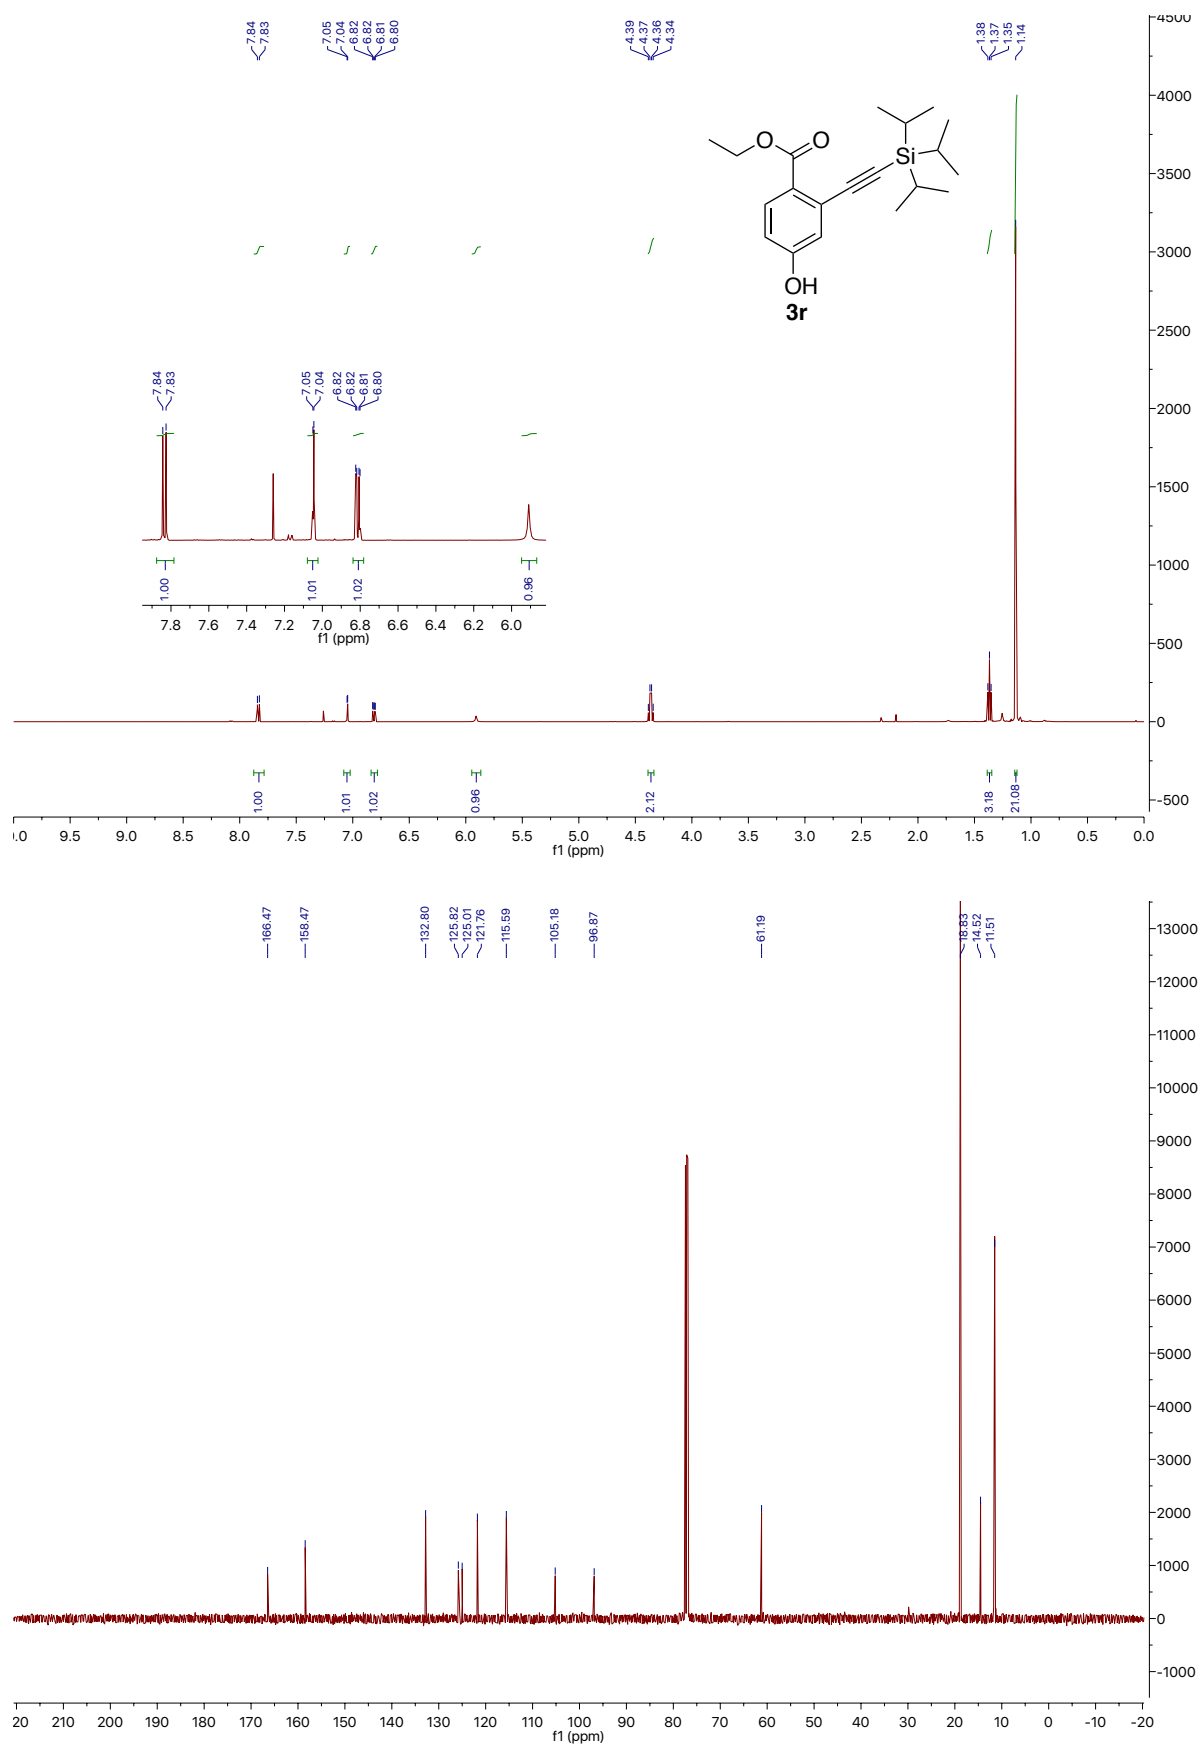

**Ethyl 4-nitro-2-((triisopropylsilyl)ethynyl)benzoate (3s)**

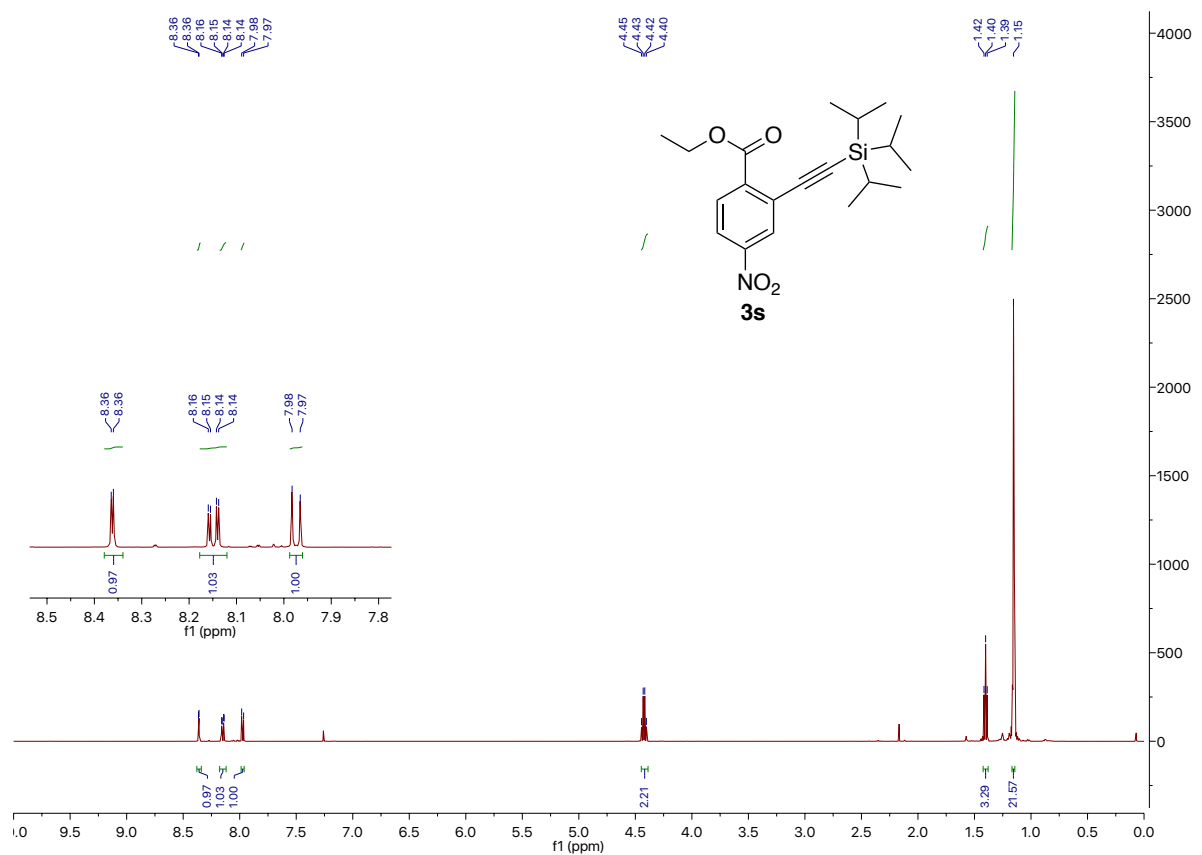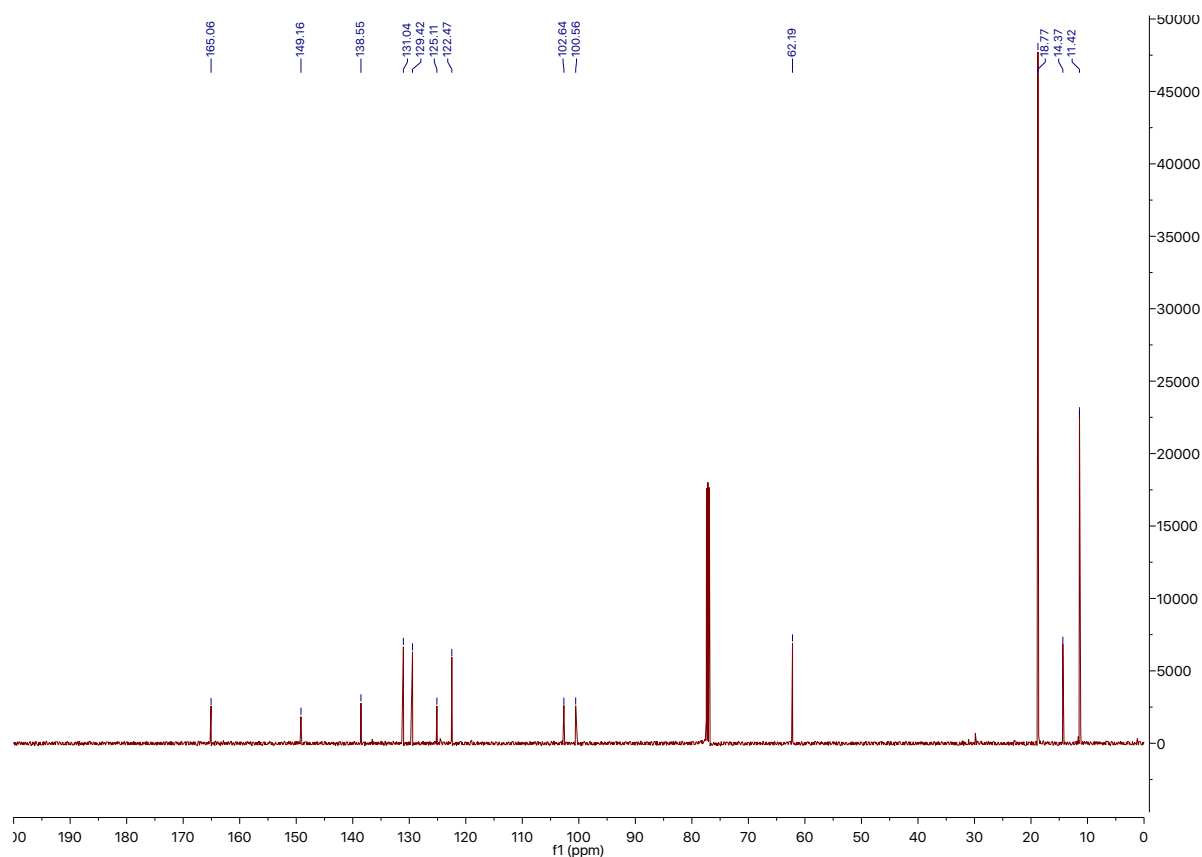

*Ethyl 4-nitro-2,6-bis((triisopropylsilyl)ethynyl)benzoate (3s'')*

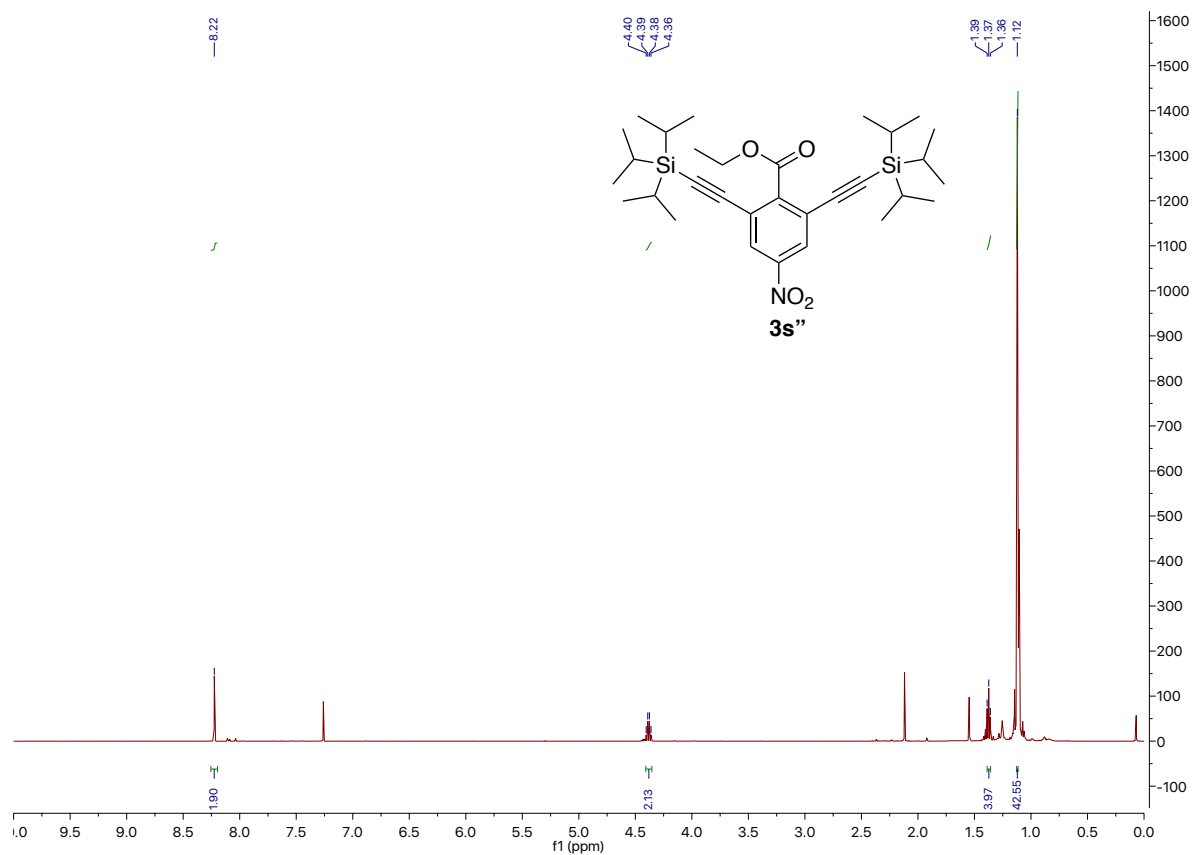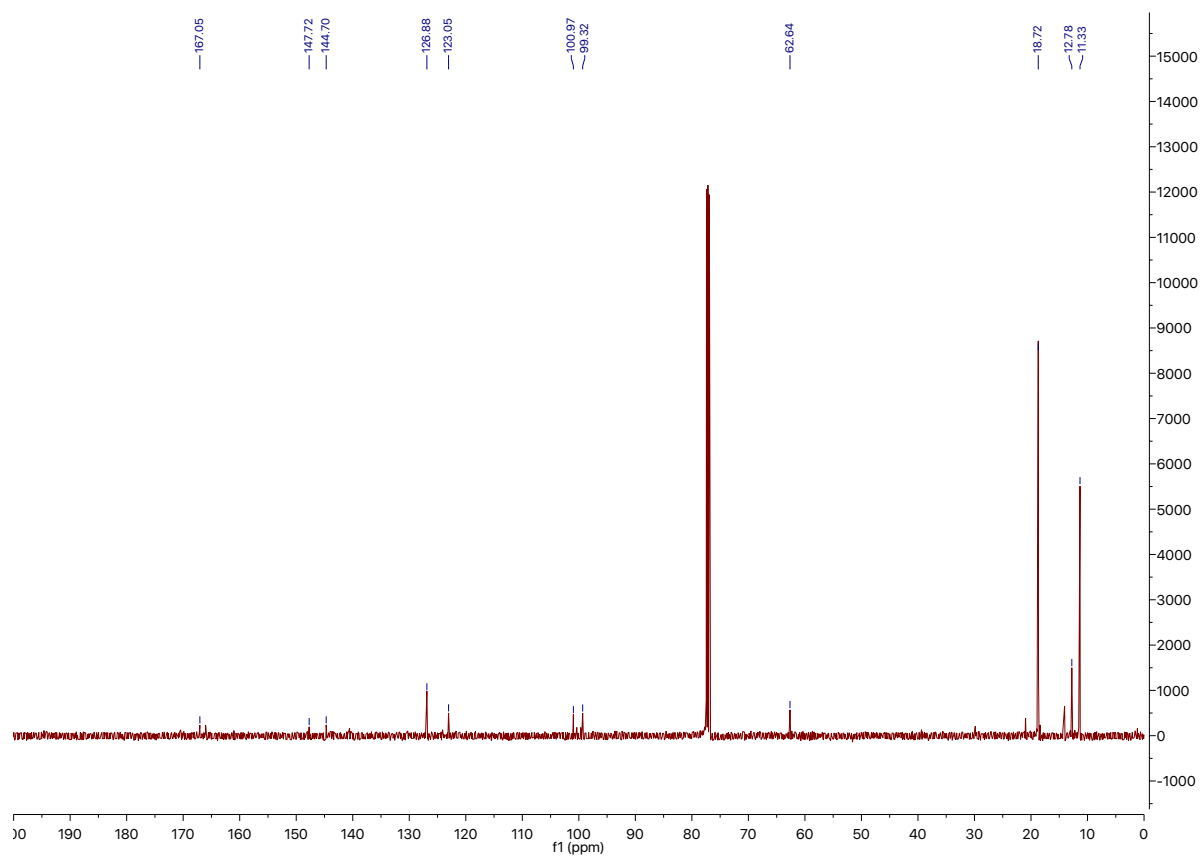

**Dimethyl 2-((triisopropylsilyl)ethynyl)terephthalate (3t)**

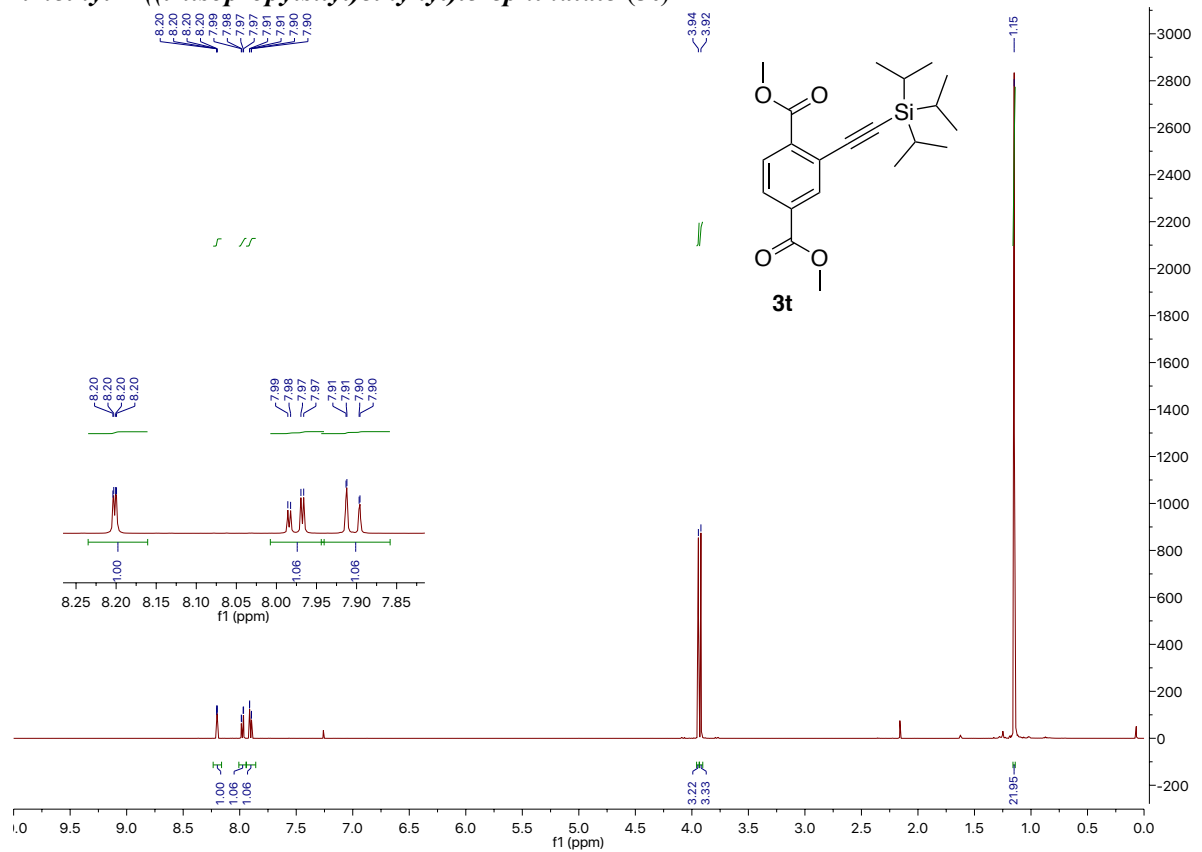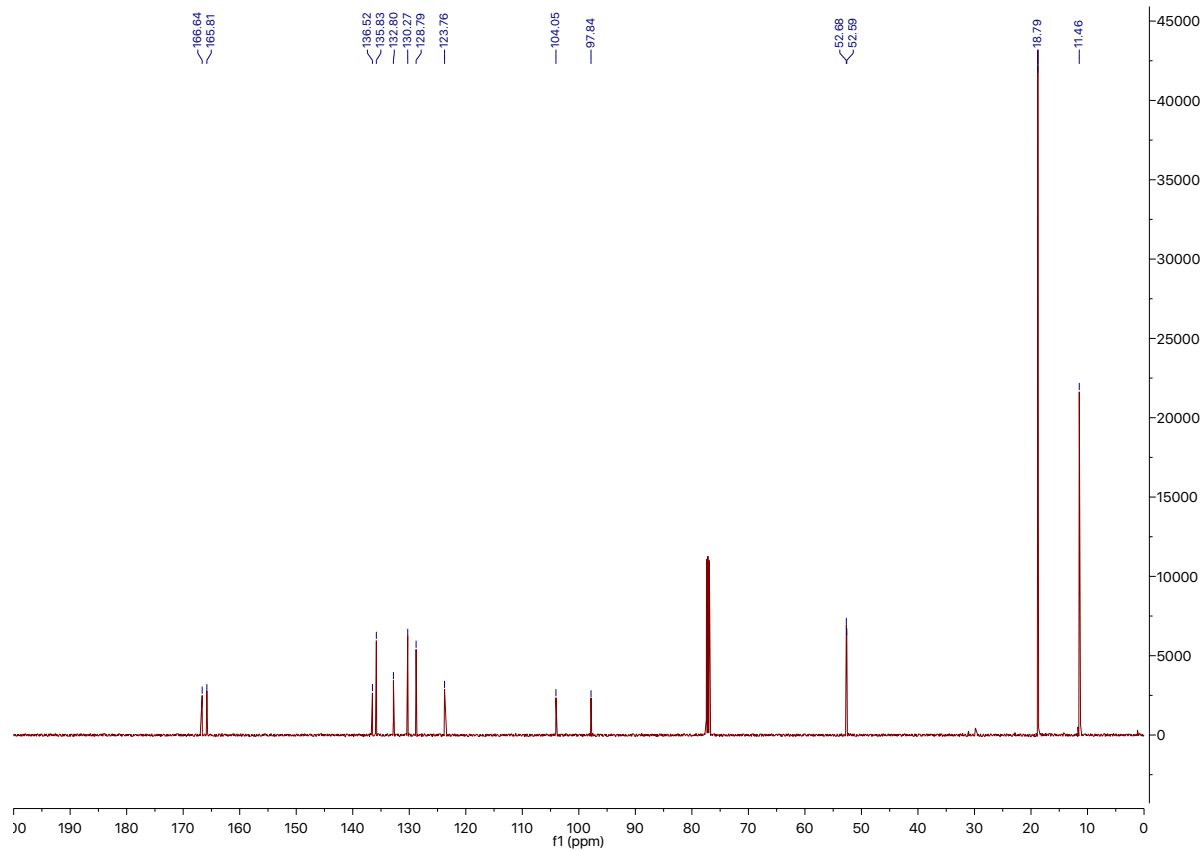

**Ethyl 2-((triisopropylsilyl)ethynyl)-1-naphthoate (3u)**

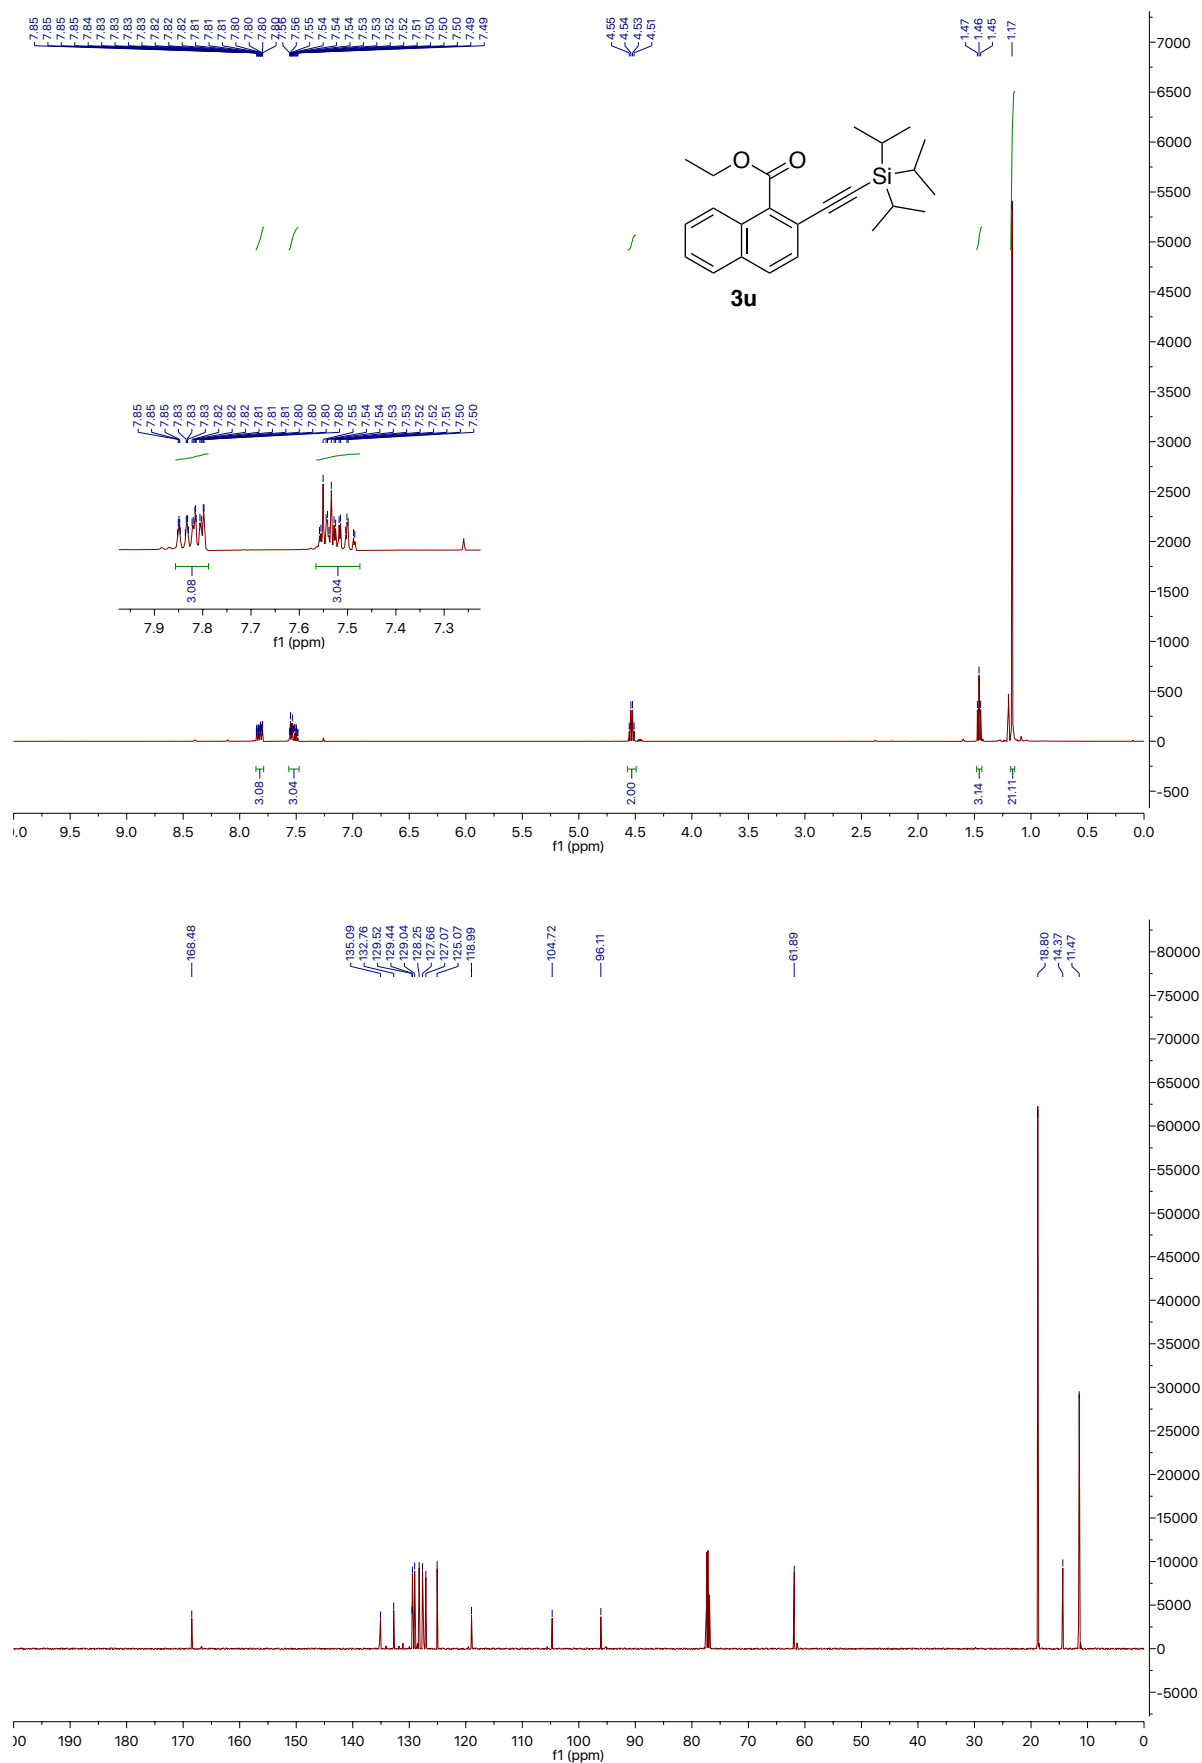





**Ethyl 5-((triisopropylsilyl)ethynyl)-5a1,10-dihydropyrene-4-carboxylate (3w)**

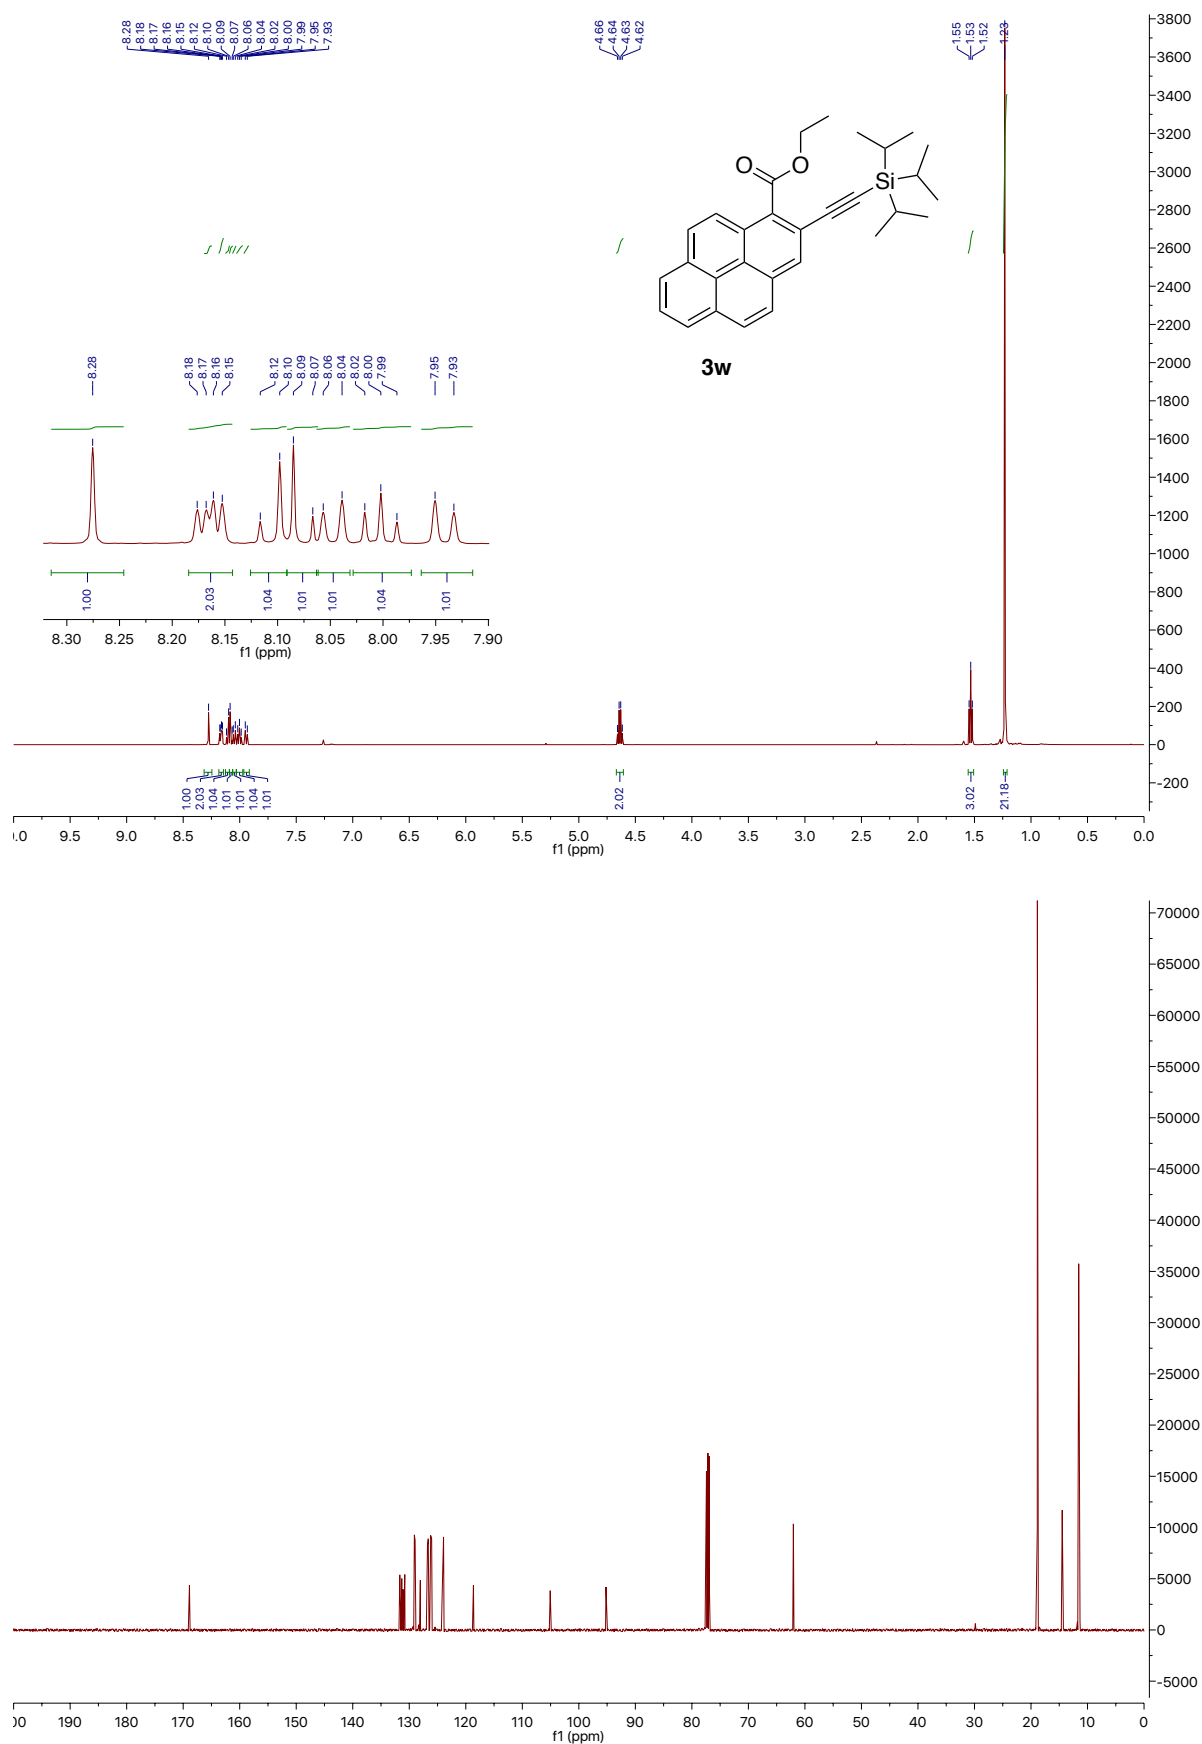

**Methyl 5-methyl-3-((triisopropylsilyl)ethynyl)furan-2-carboxylate (3x)**

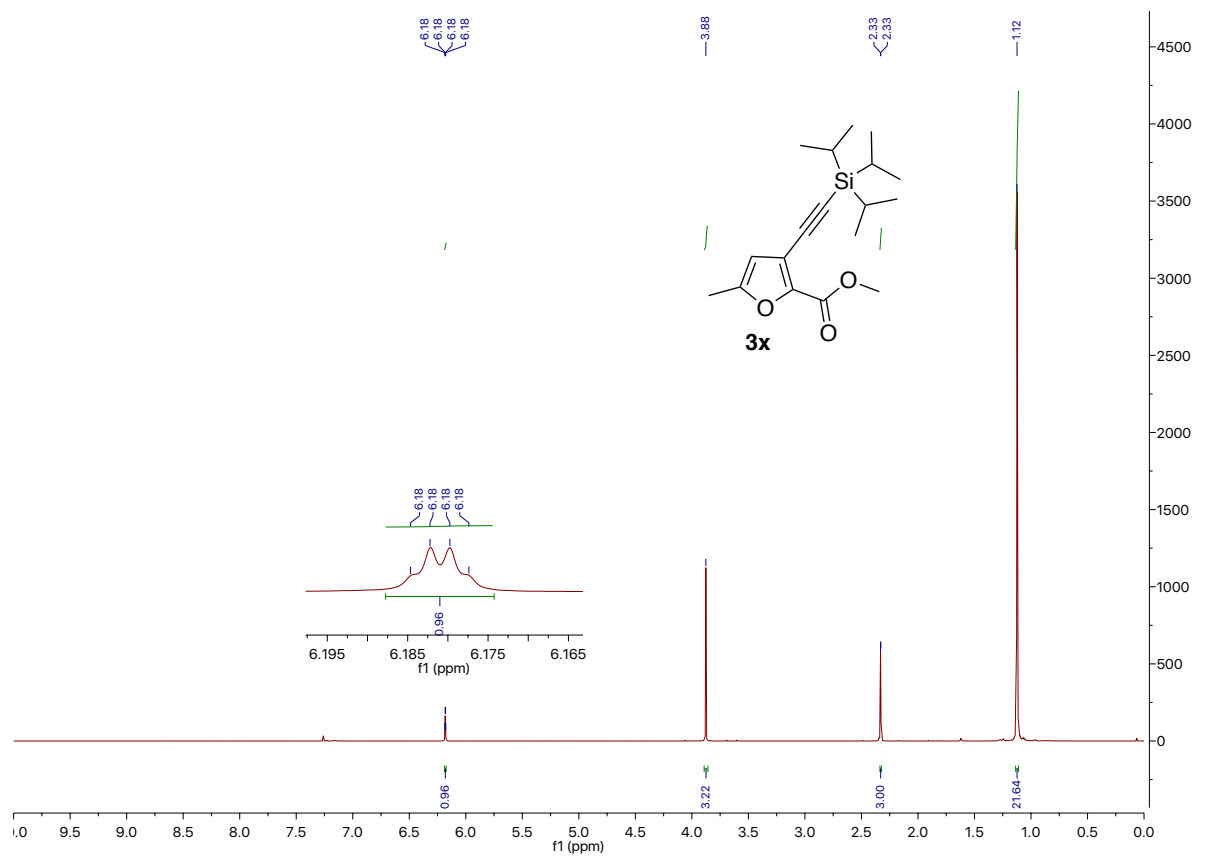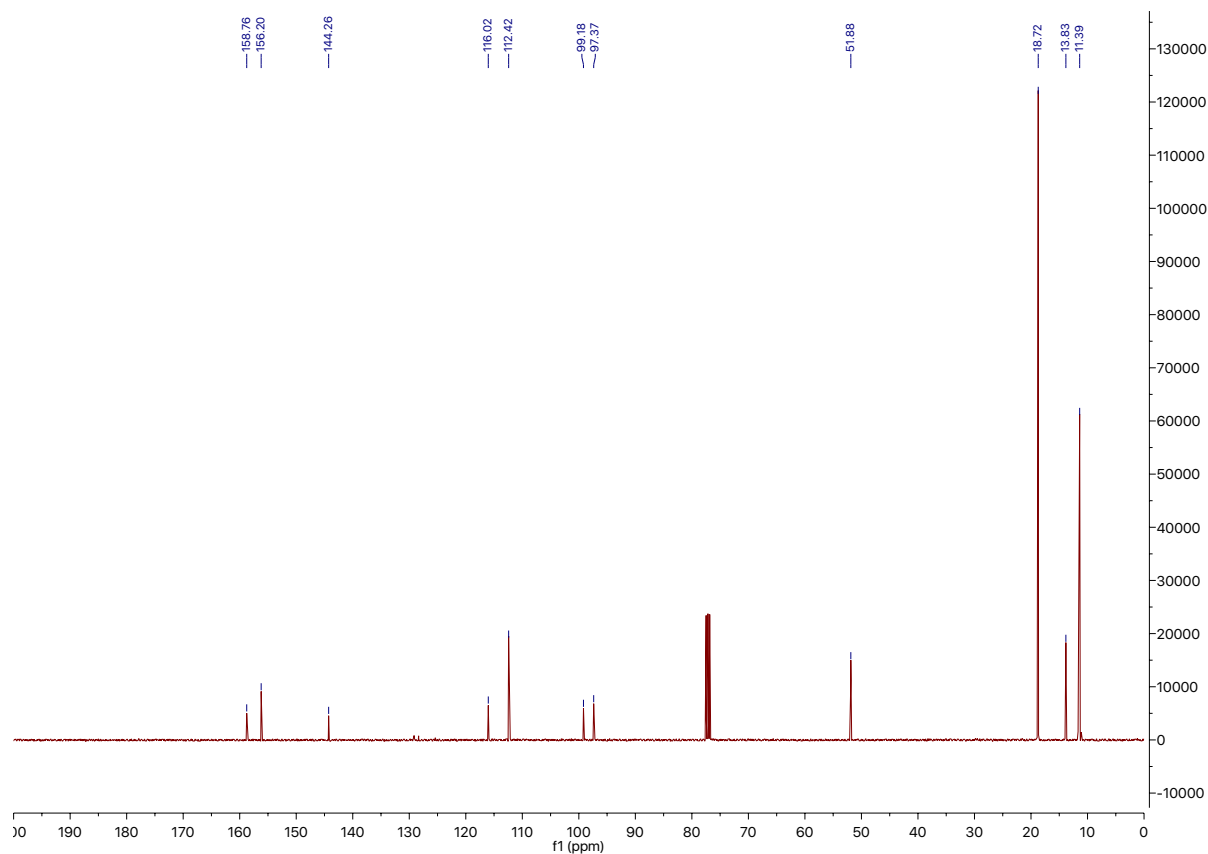

**Methyl 3-((triisopropylsilyl)ethynyl)thiophene-2-carboxylate (3y)**

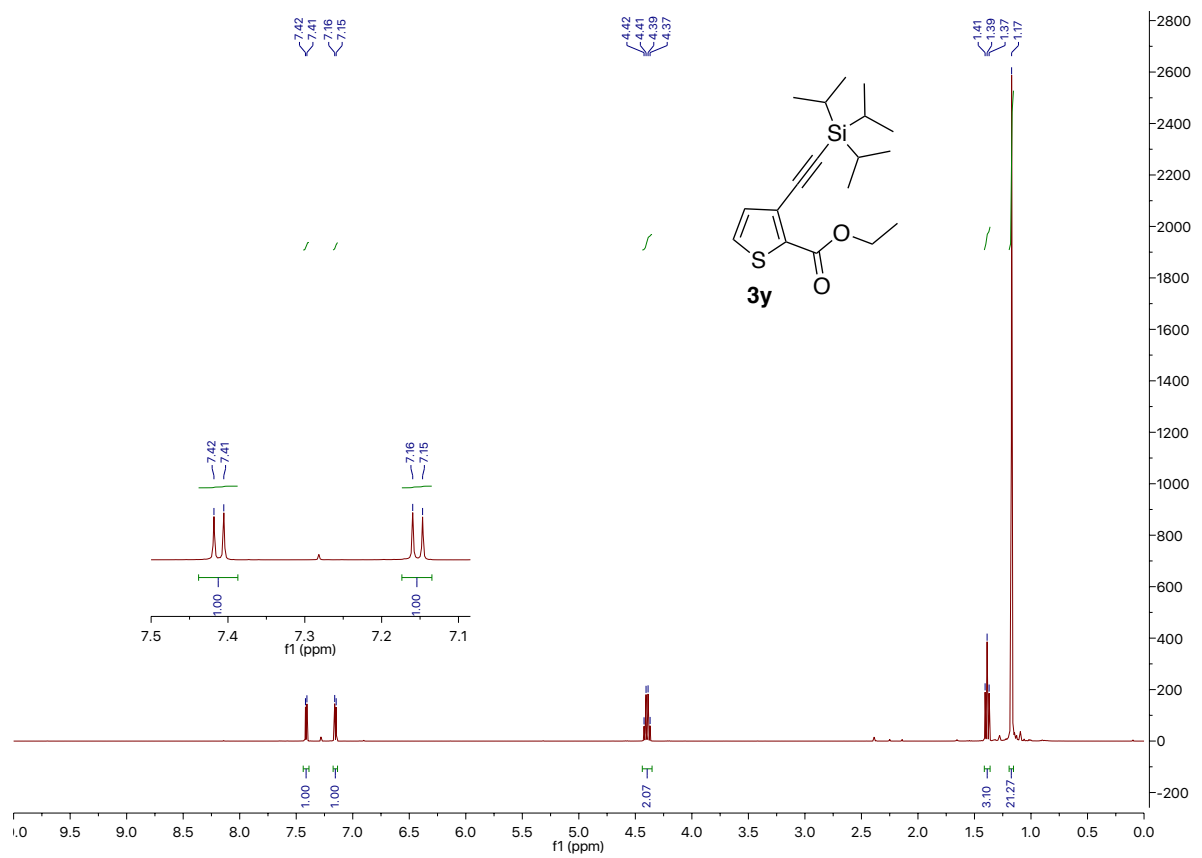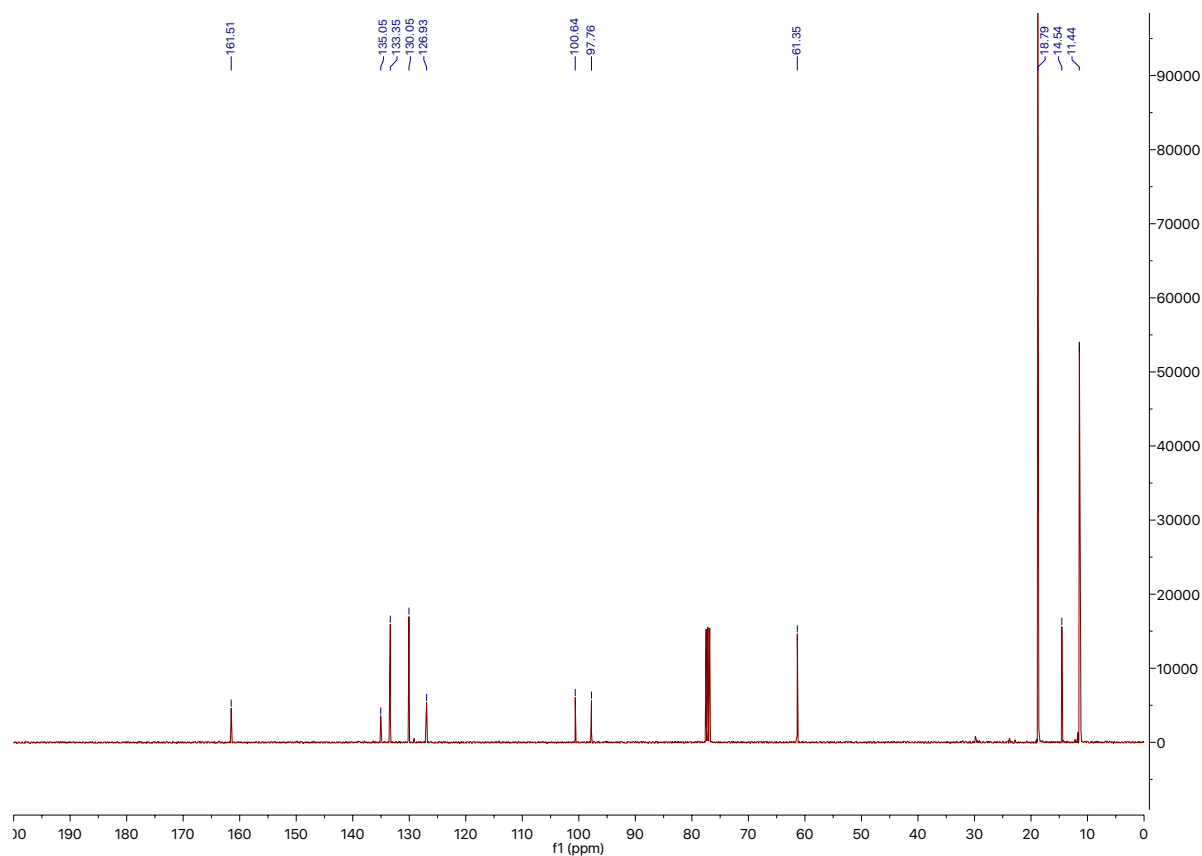

**8-((Triisopropylsilyl)ethynyl)isochroman-1-one (3z)**

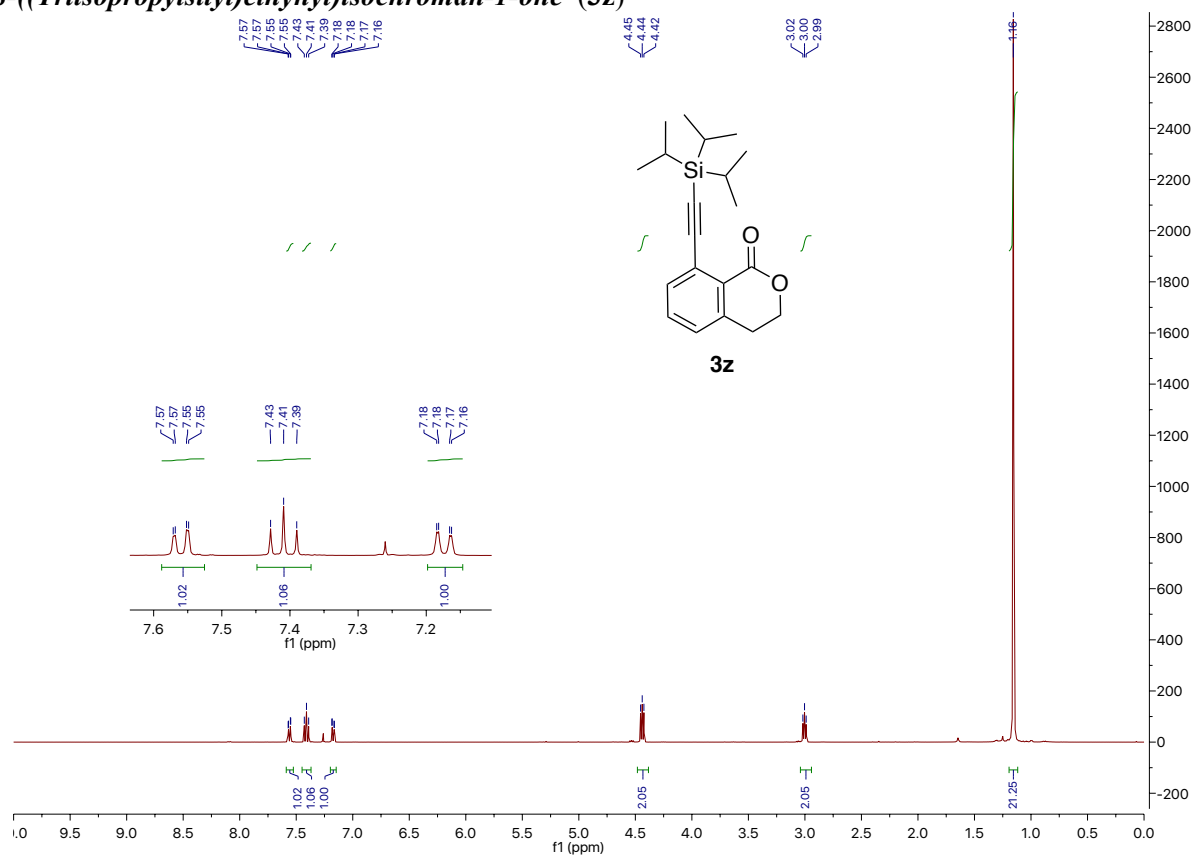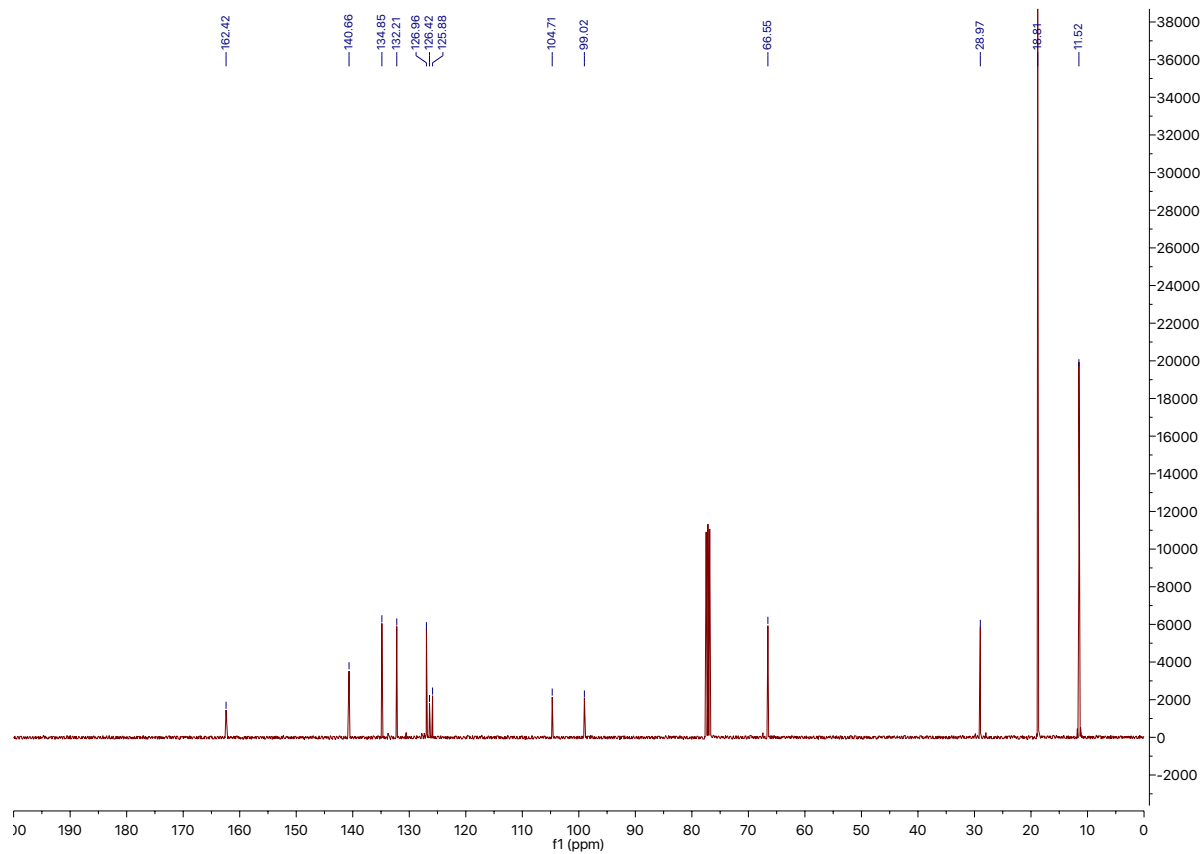



**Triisopropyl((2-(methoxymethyl)phenyl)ethynyl)silane (5a)**

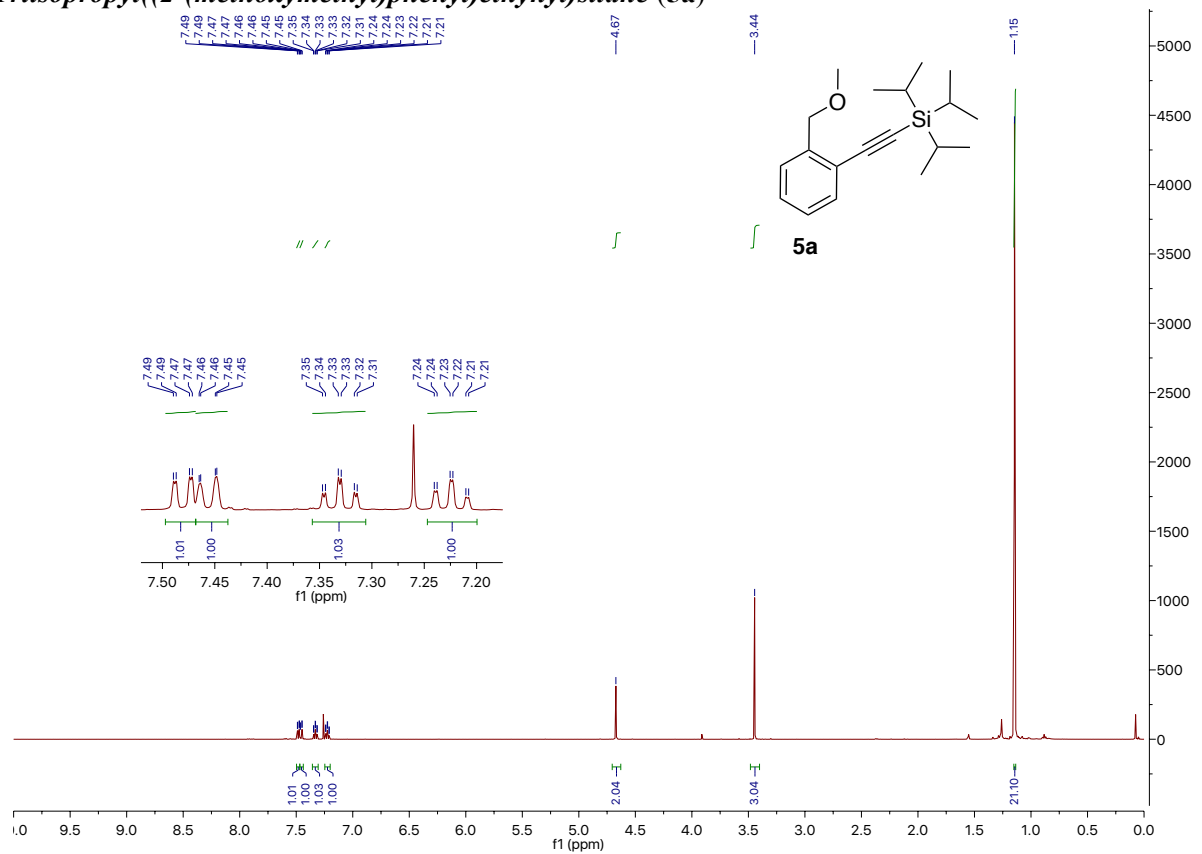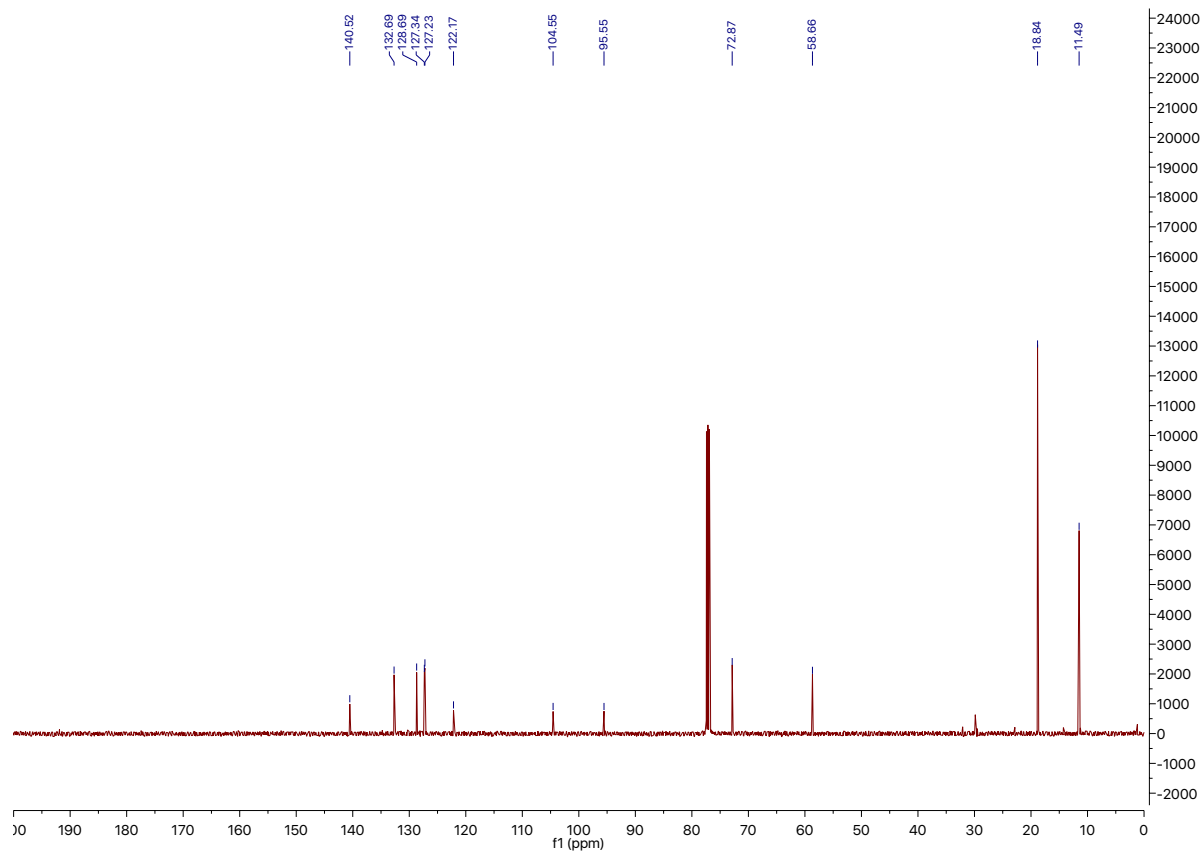

**((3-Fluoro-2-(methoxymethyl)phenyl)ethynyl)triisopropylsilane (5h)**

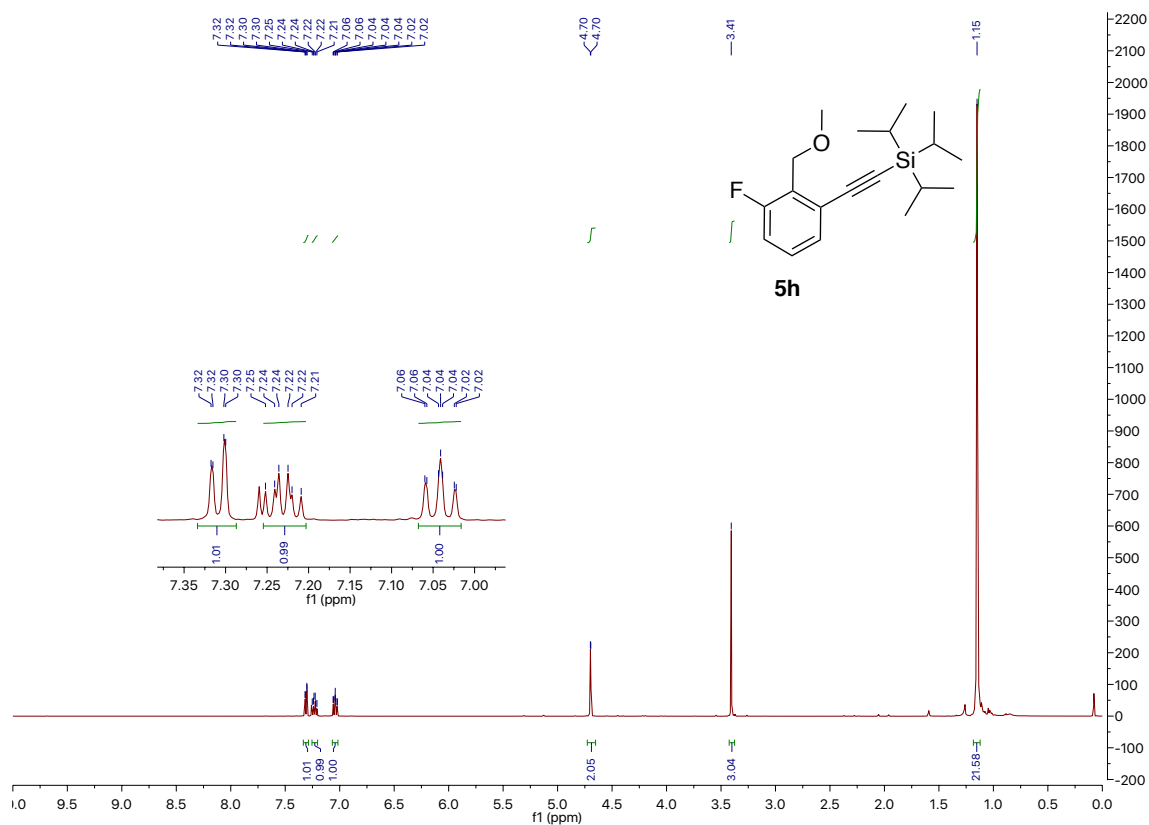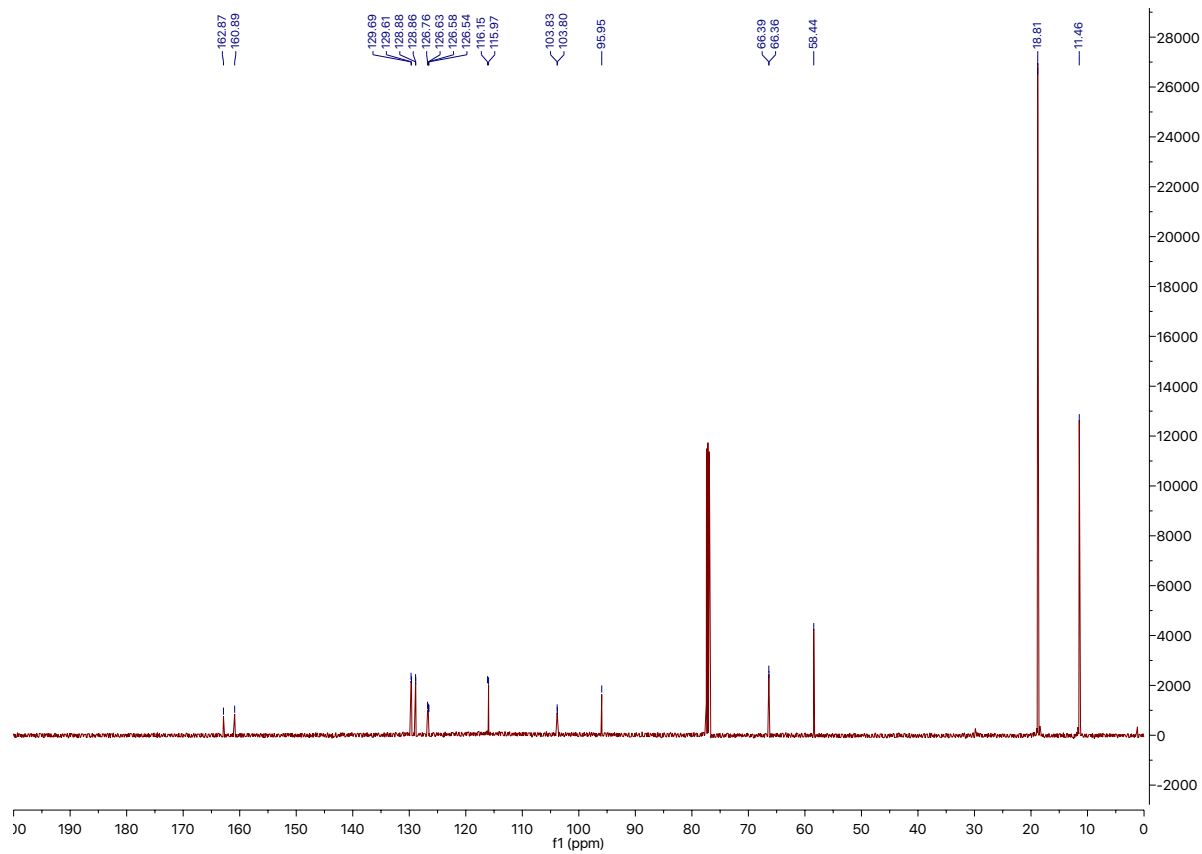



**((3-Chloro-2-(methoxymethyl)phenyl)ethynyl)triisopropylsilane (5i)**

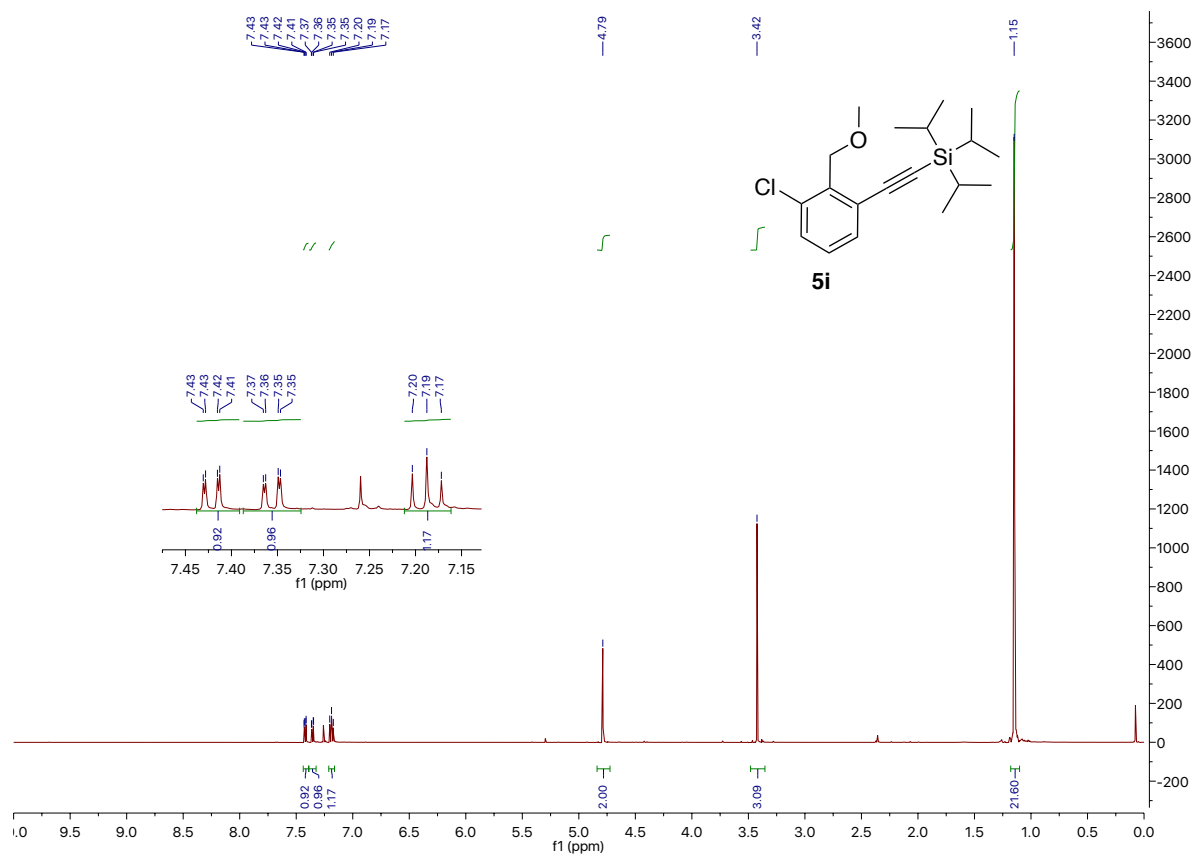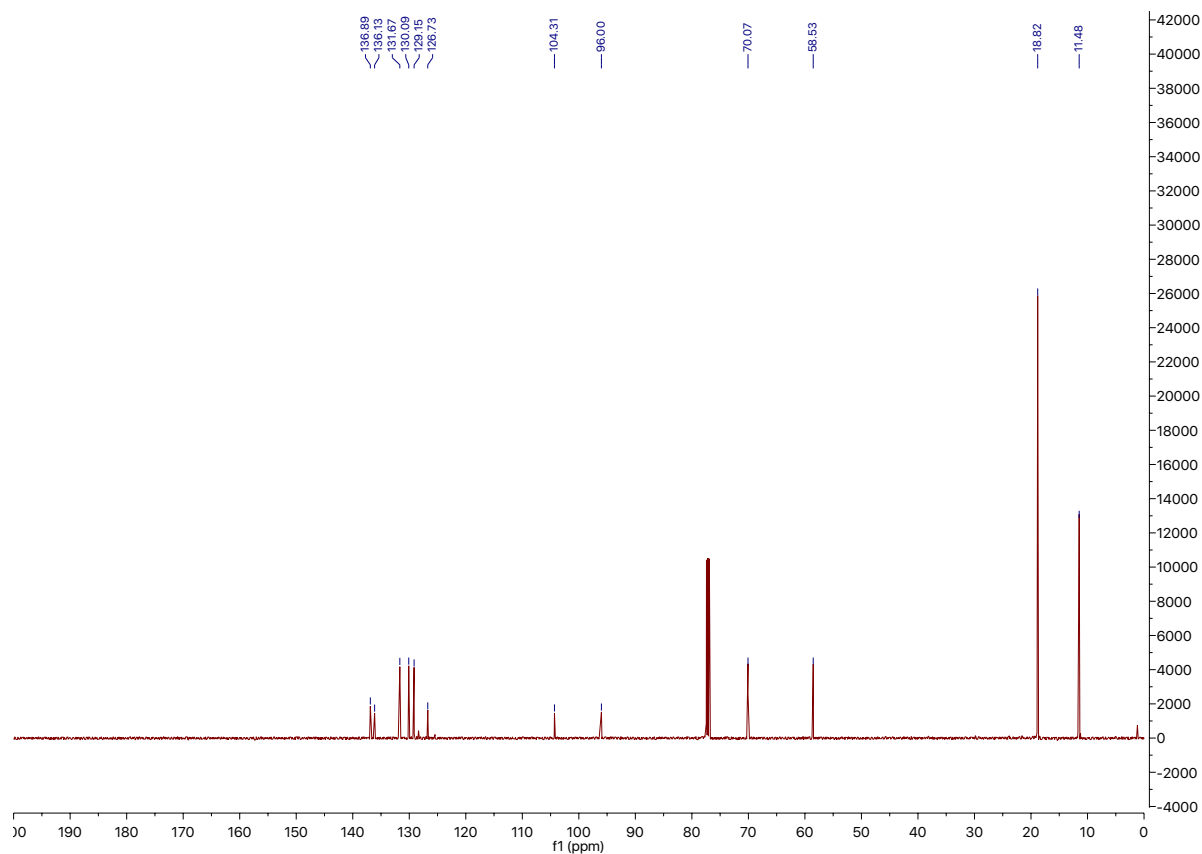

**((3-Bromo-2-(methoxymethyl)phenyl)ethynyl)triisopropylsilane (5j)**

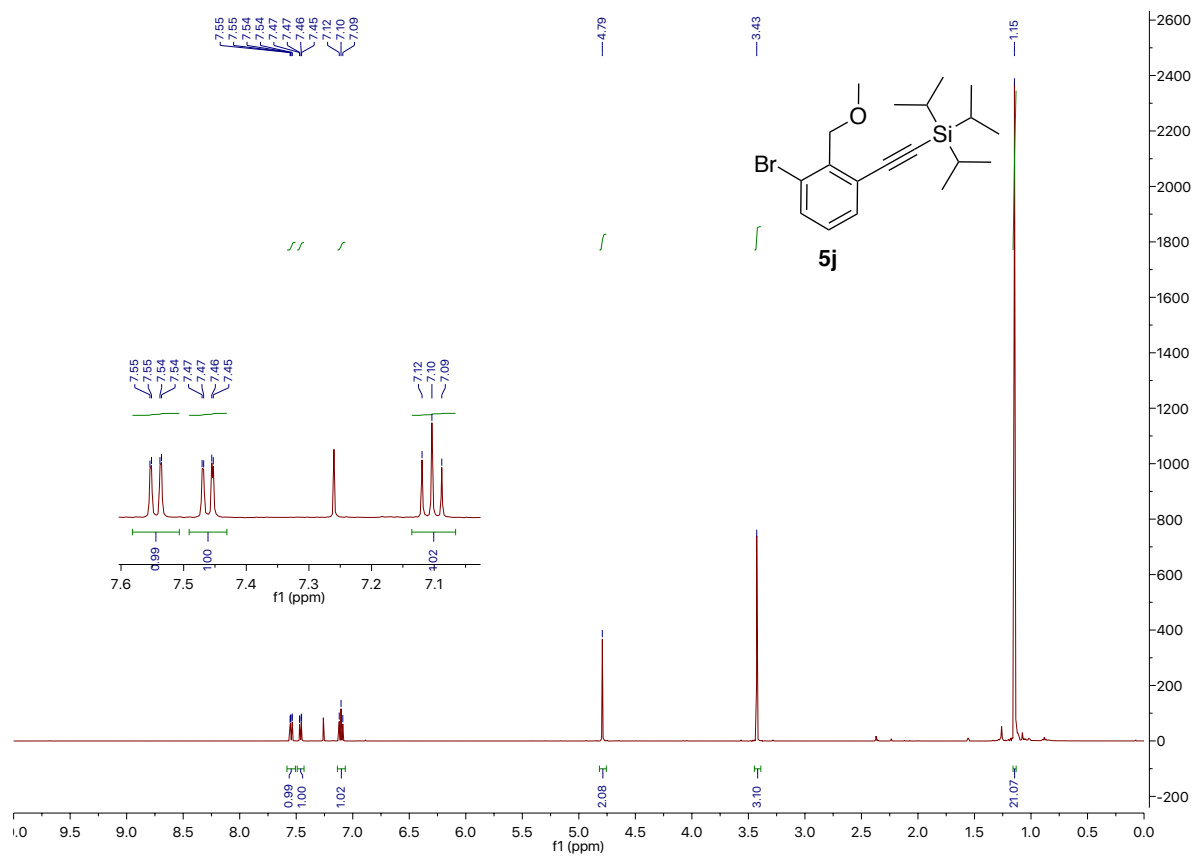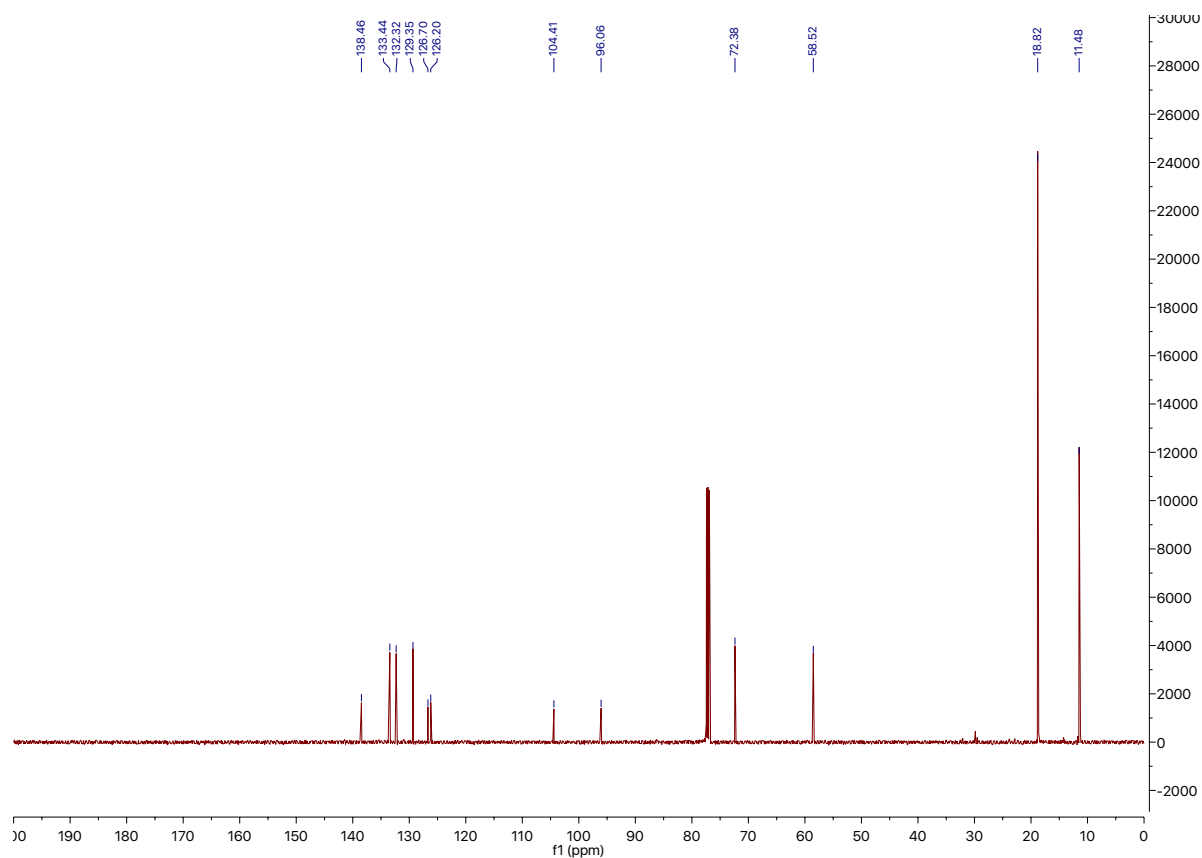

**((3-Iodo-2-(methoxymethyl)phenyl)ethynyl)triisopropylsilane (5k)**

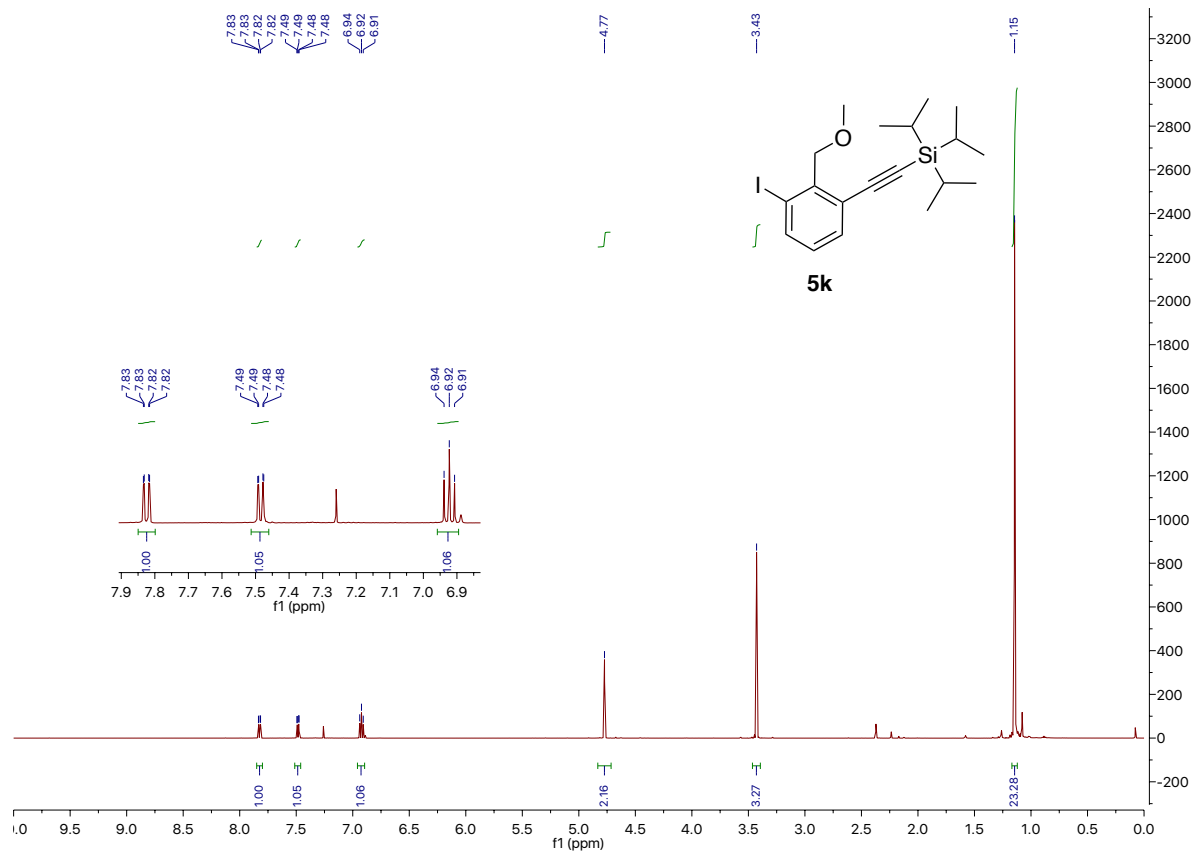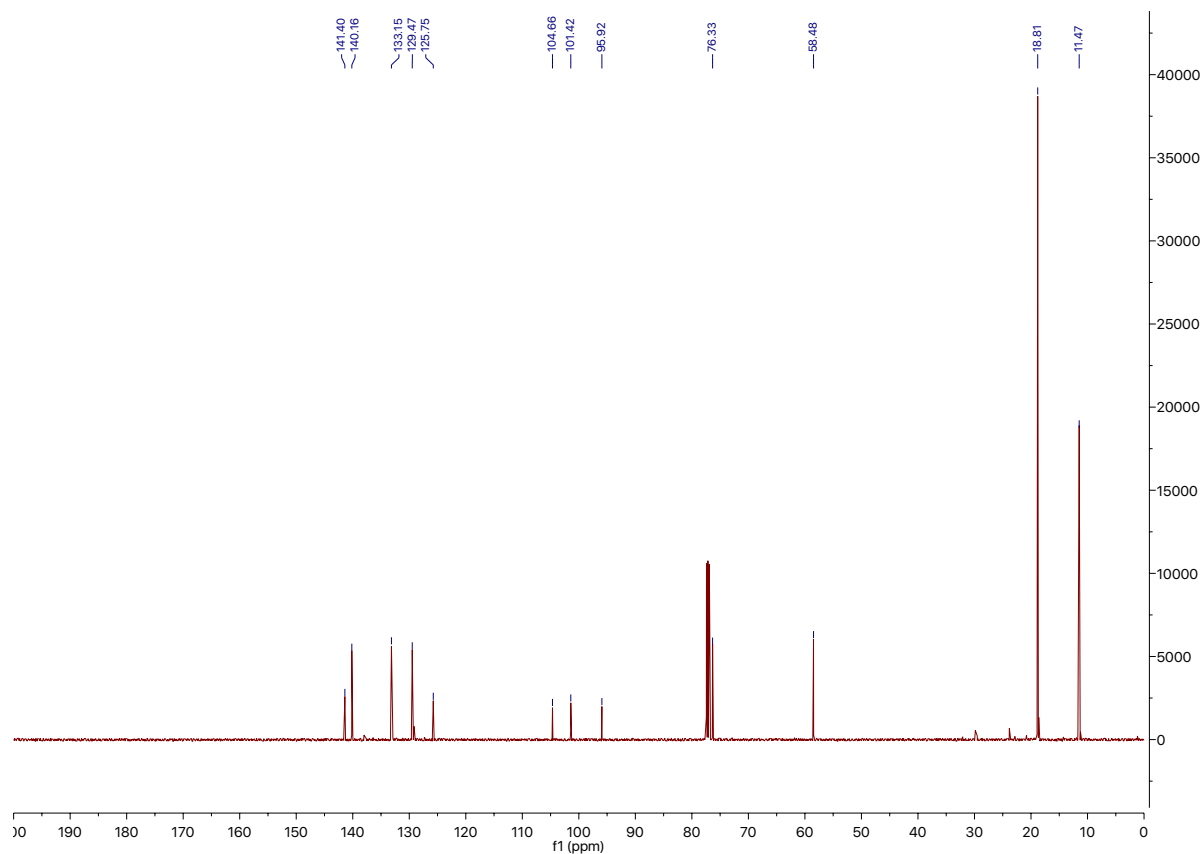

**Triisopropyl((2-(methoxymethyl)-3-(trifluoromethyl)phenyl)ethynyl)silane (51)**

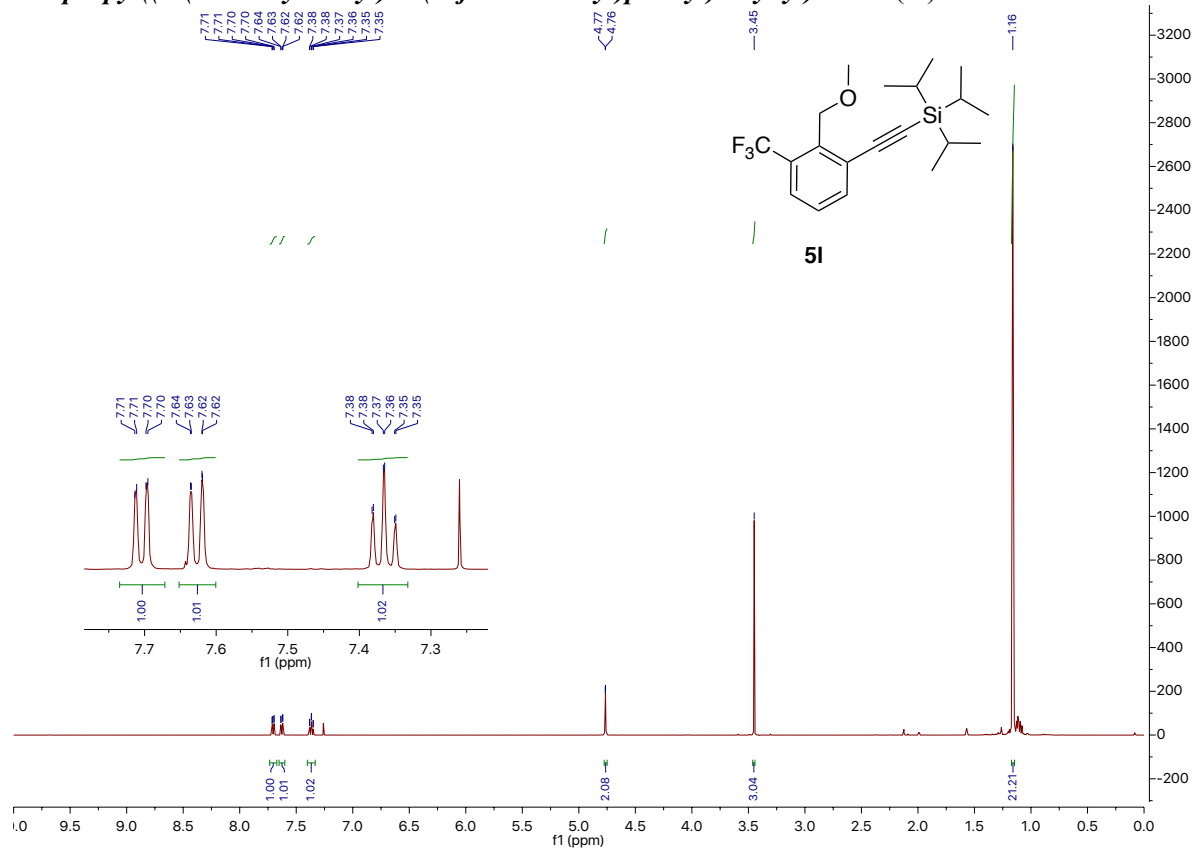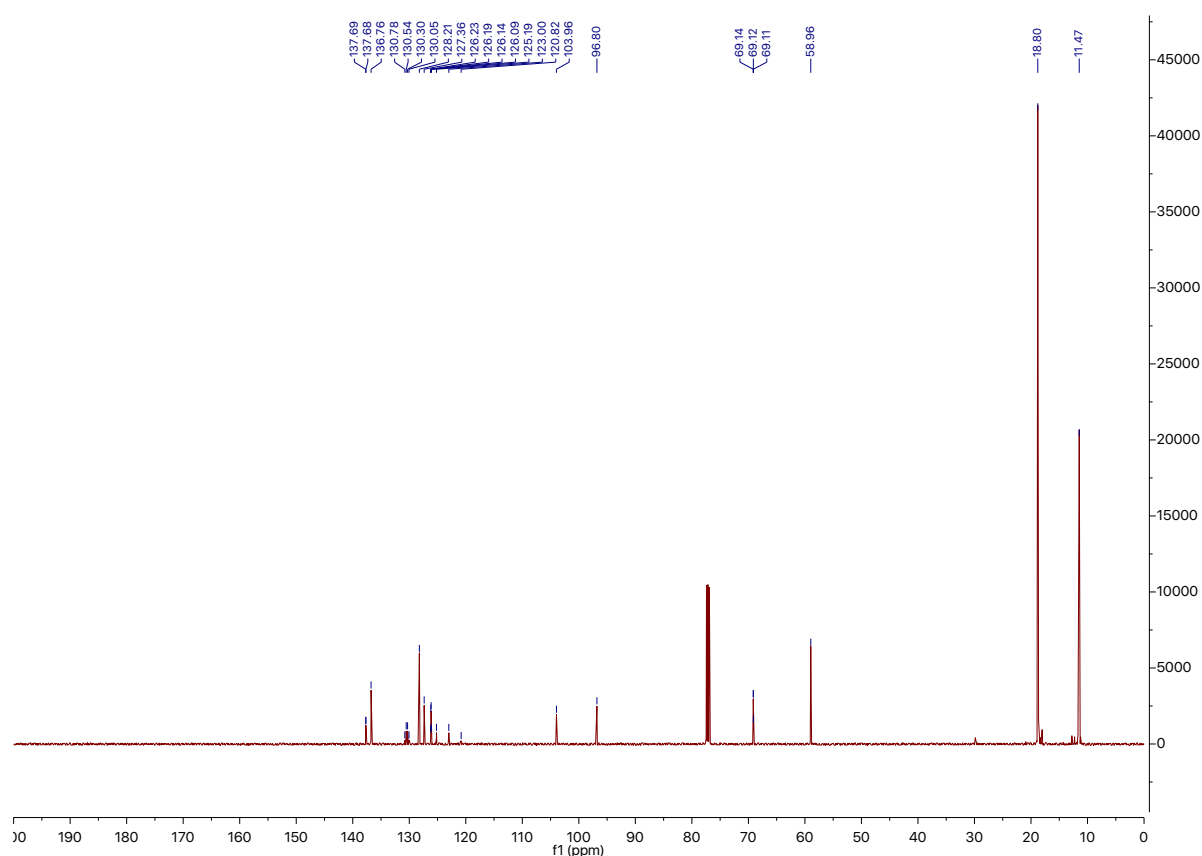

**((2-Fluoro-6-(methoxymethyl)phenyl)ethynyl)triisopropylsilane (5m')**

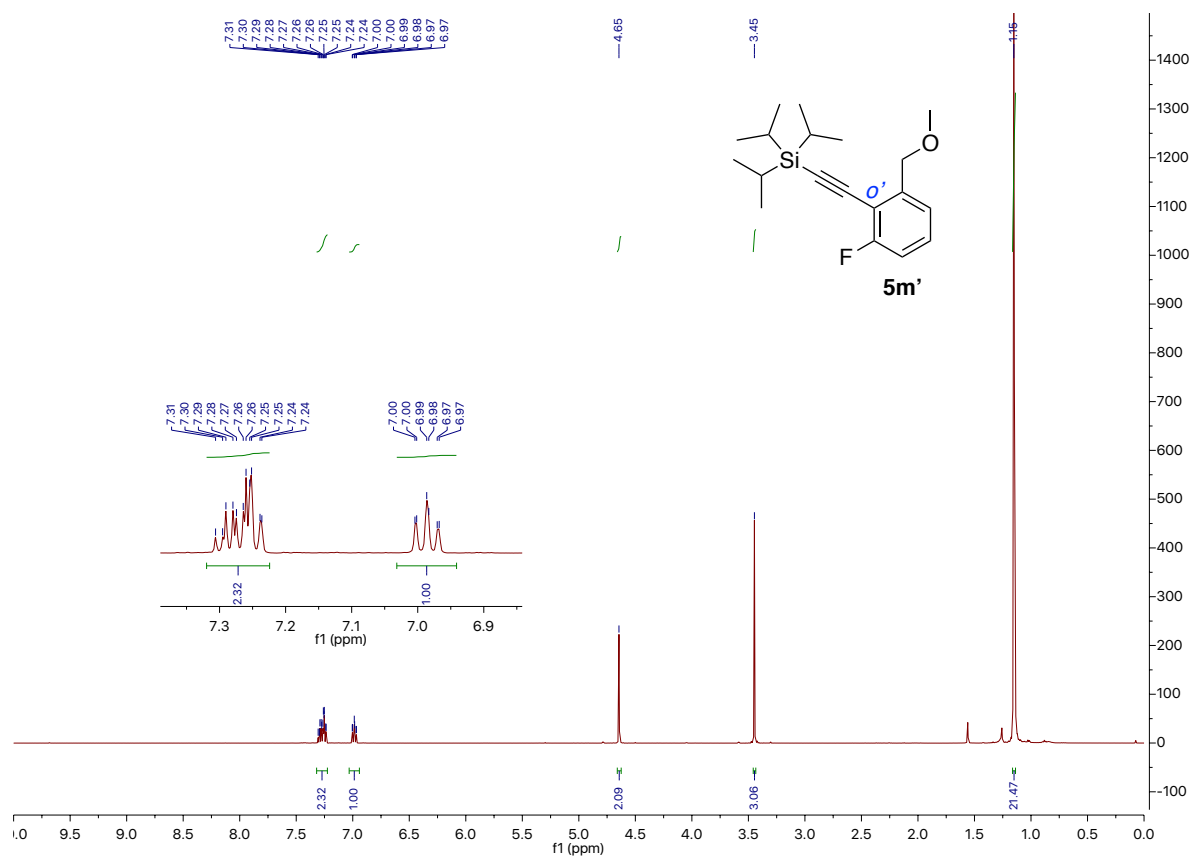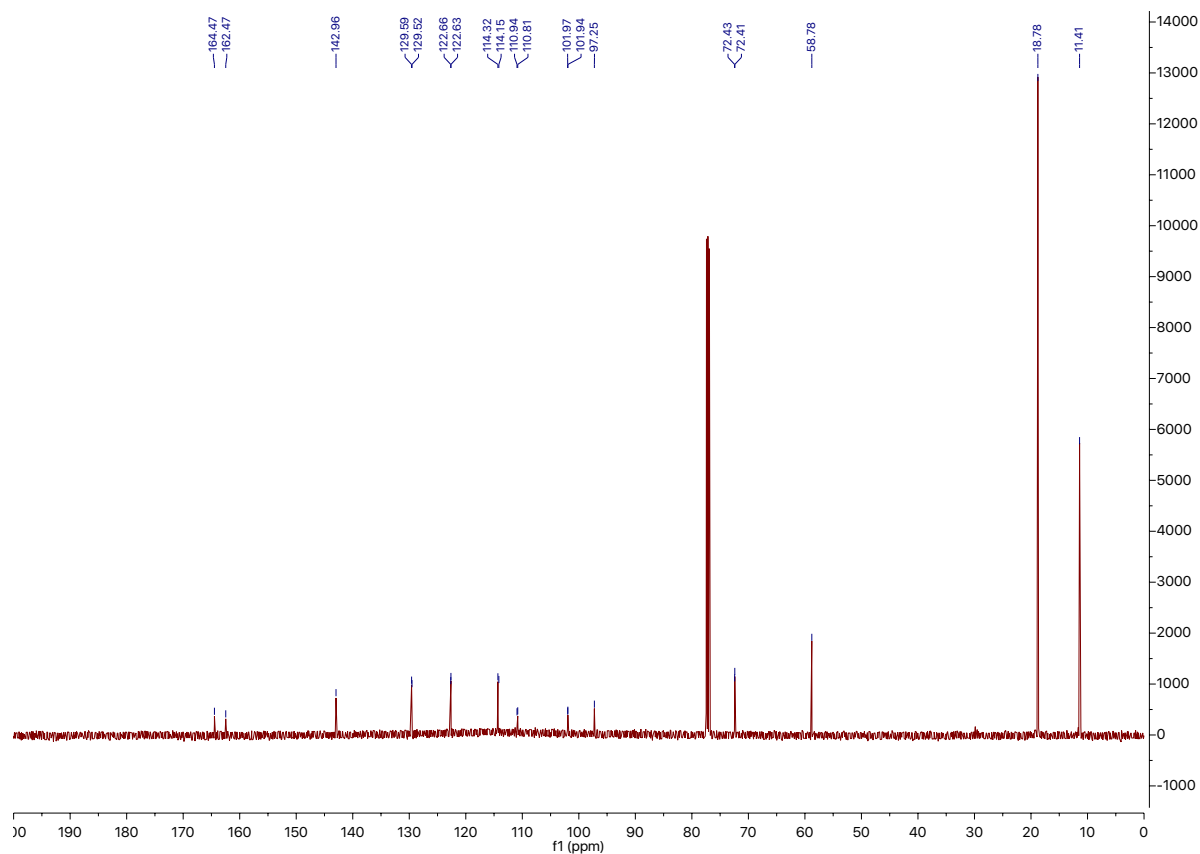

**((4-Fluoro-2-(methoxymethyl)phenyl)ethynyl)triisopropylsilane (5m)**

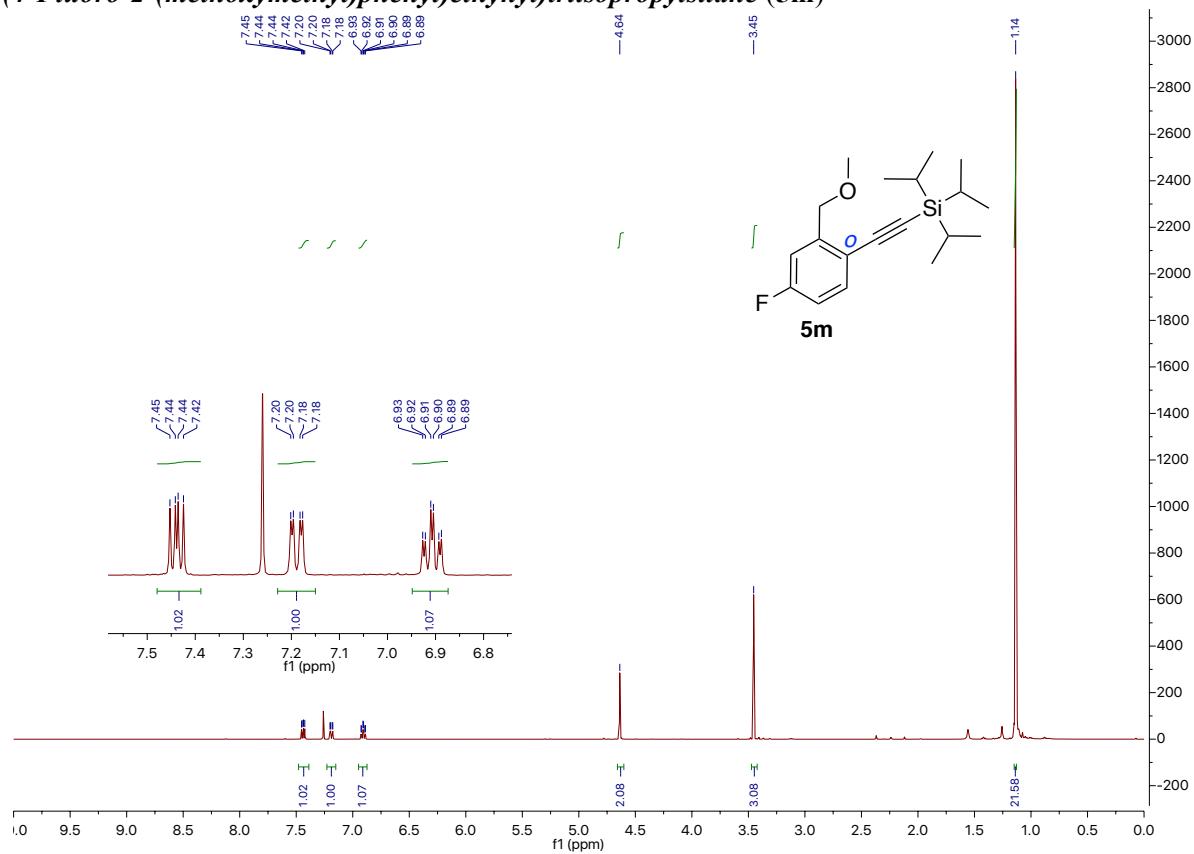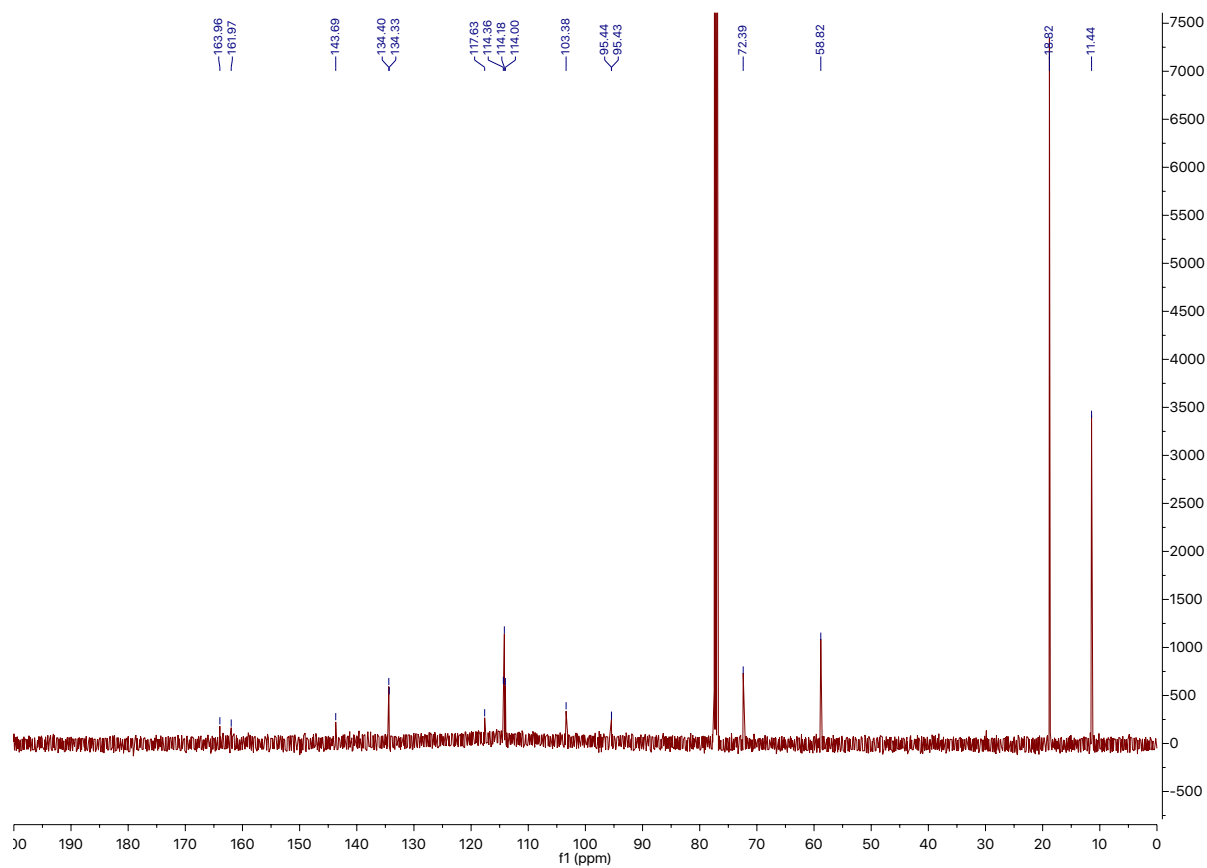

**((4-Fluoro-2-(methoxymethyl)-1,3-phenylene)bis(ethyne-2,1-diyl))bis(triisopropylsilane) (5m<sup>''</sup>)**

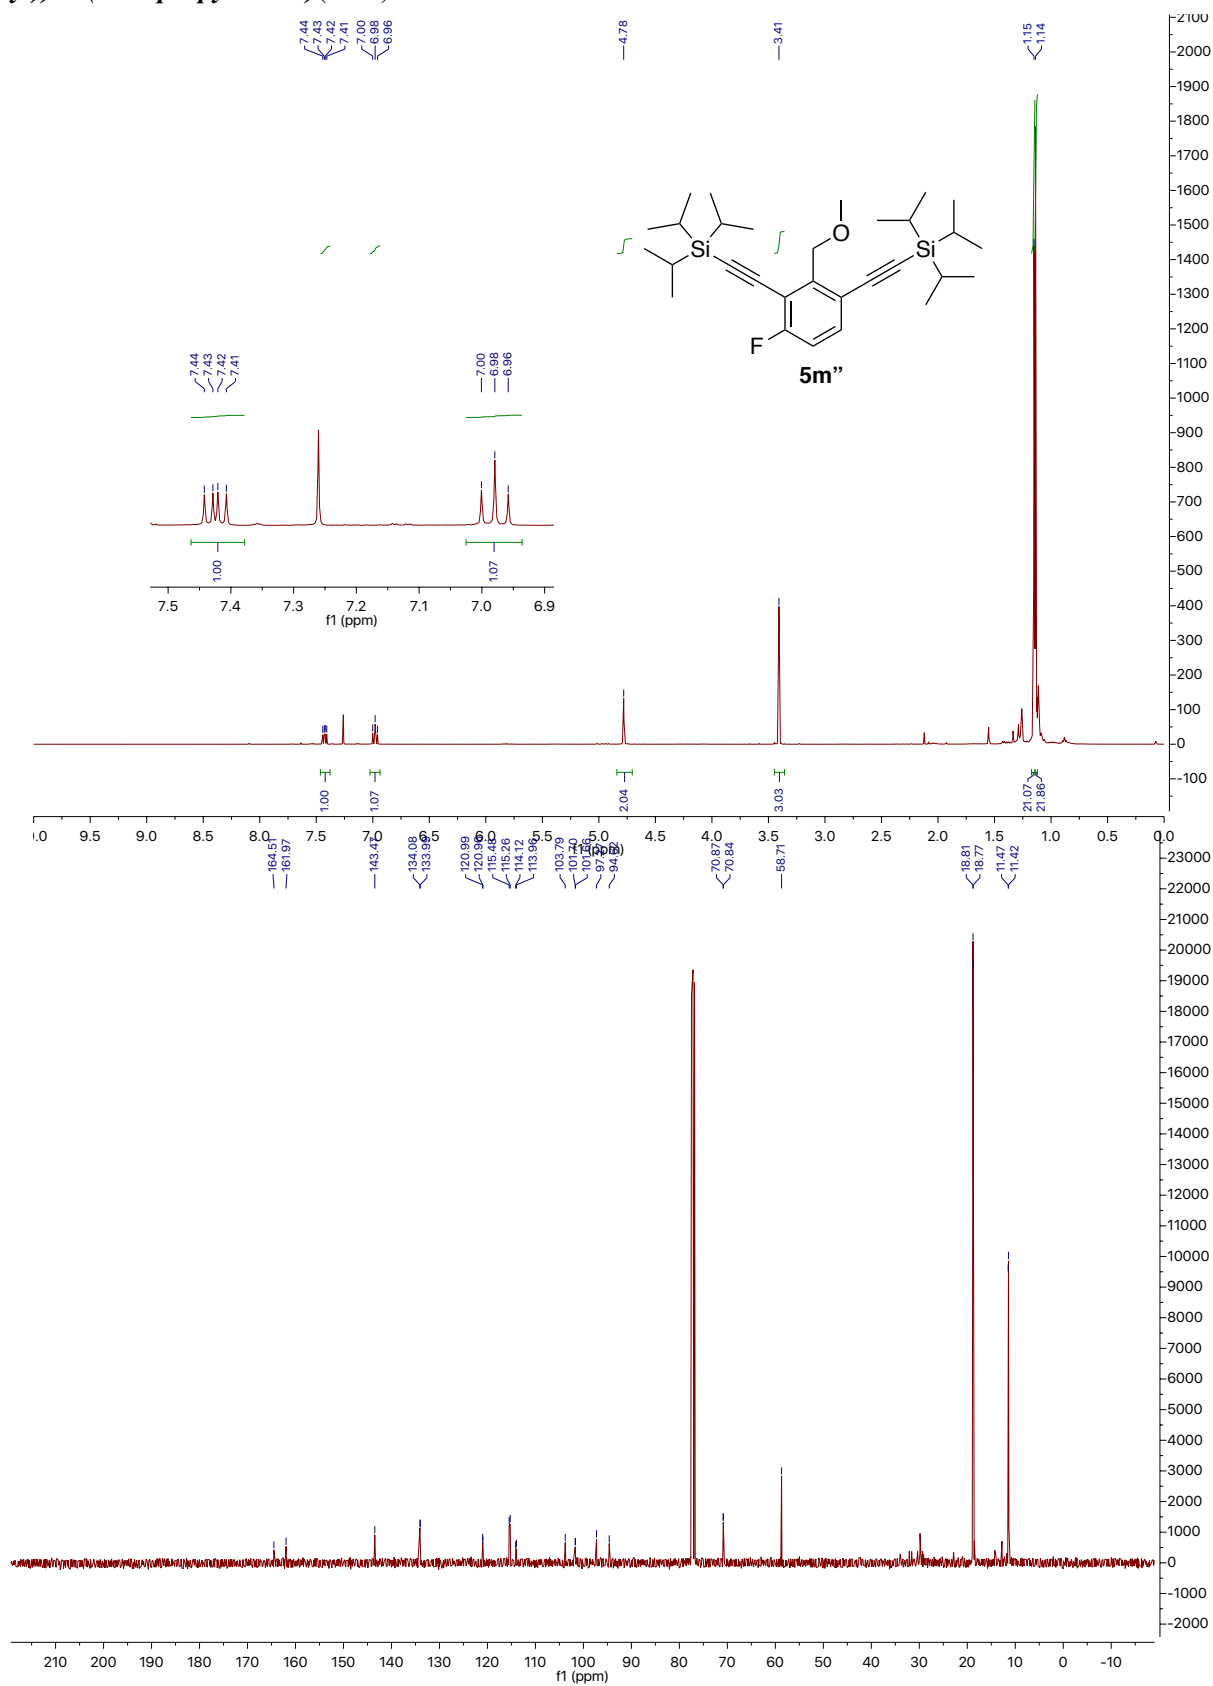

**((4-Chloro-2-(methoxymethyl)phenyl)ethynyl)triisopropylsilane (5n)**

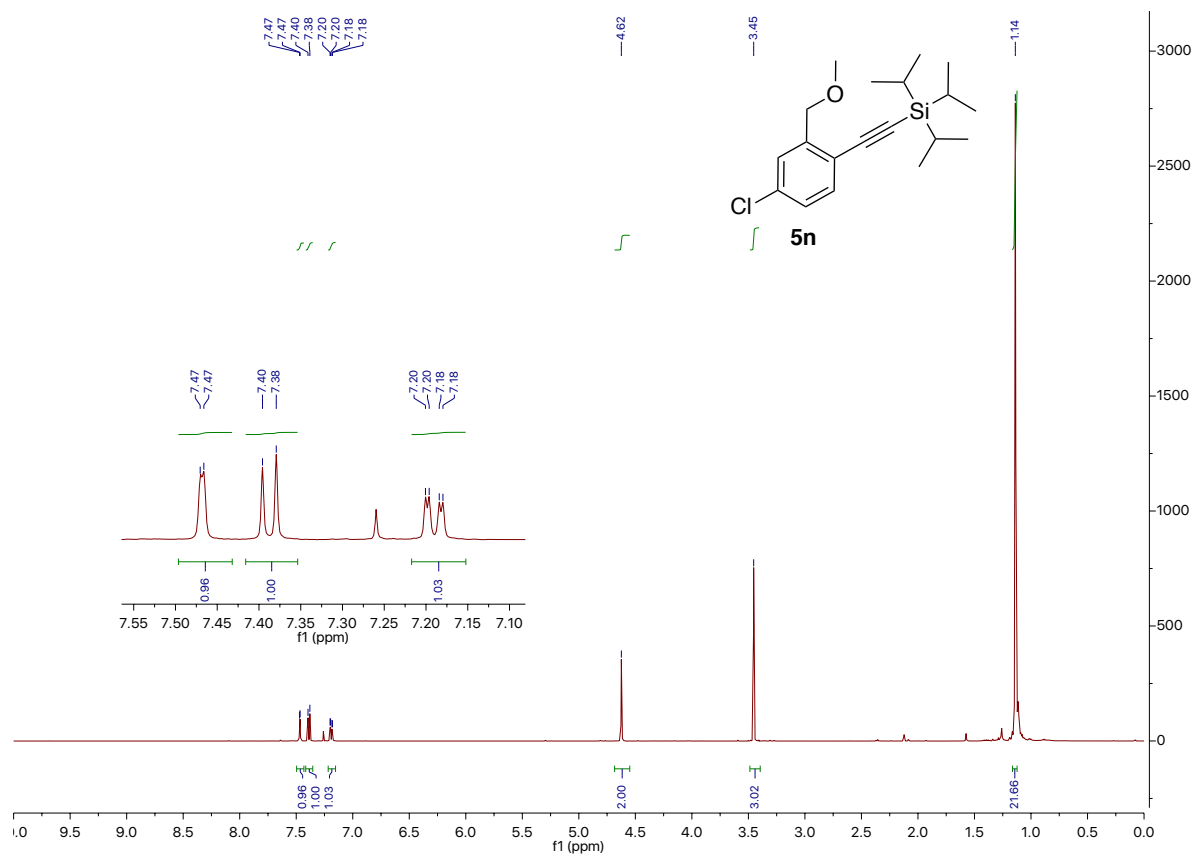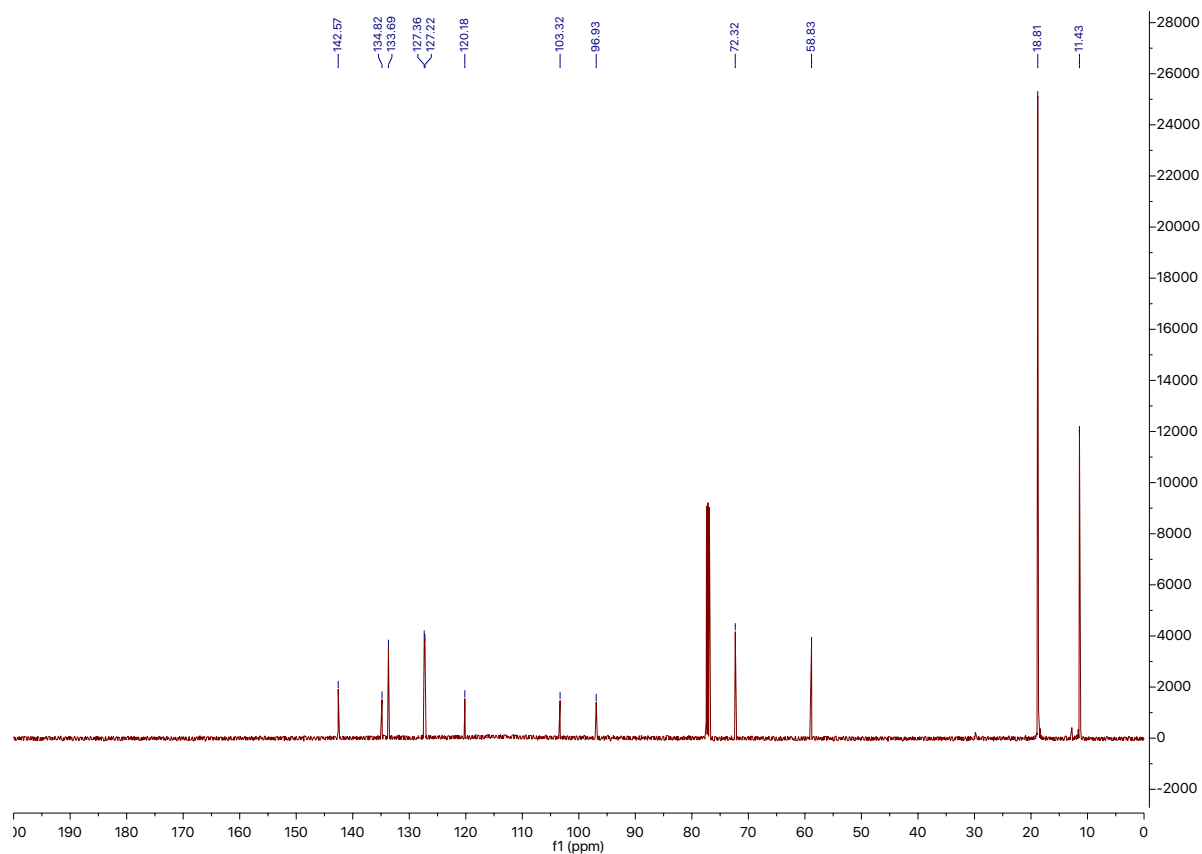



**Triisopropyl((2-(methoxymethyl)-4-(trifluoromethyl)phenyl)ethynyl)silane (5o)**

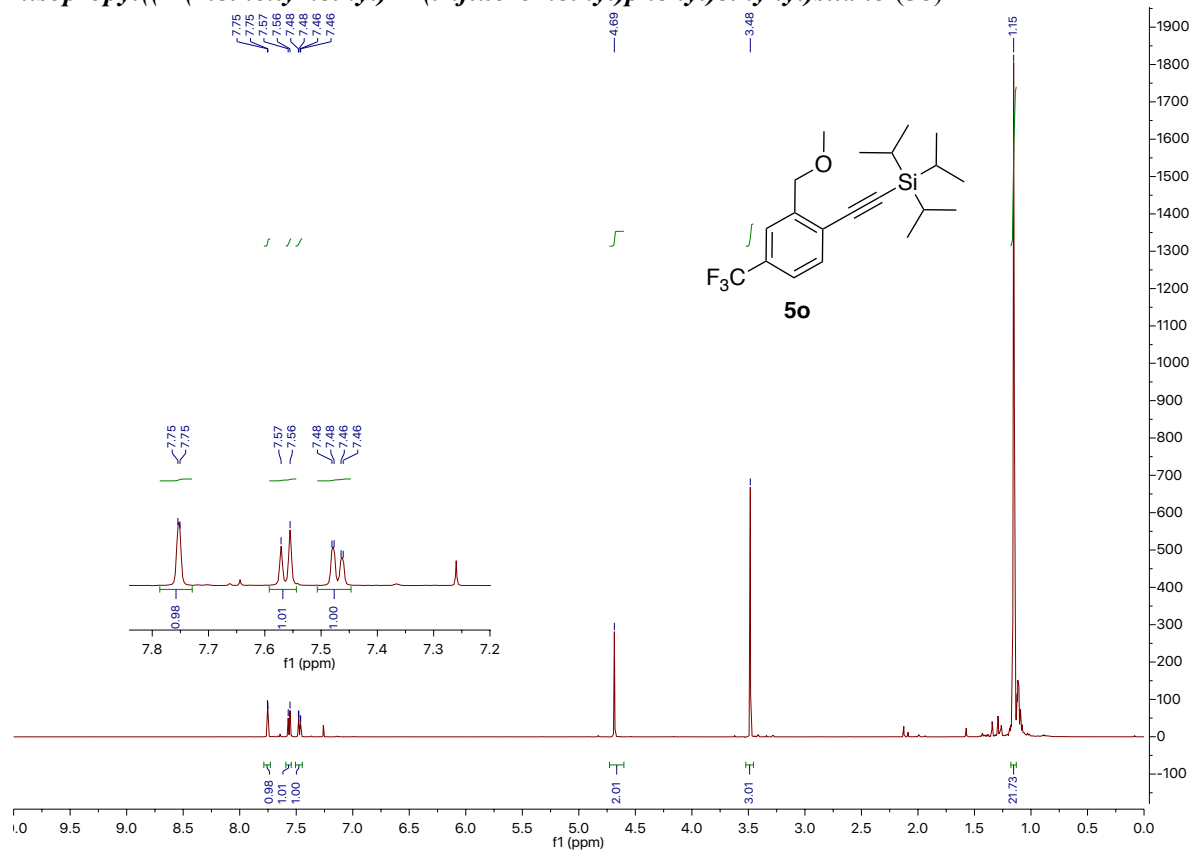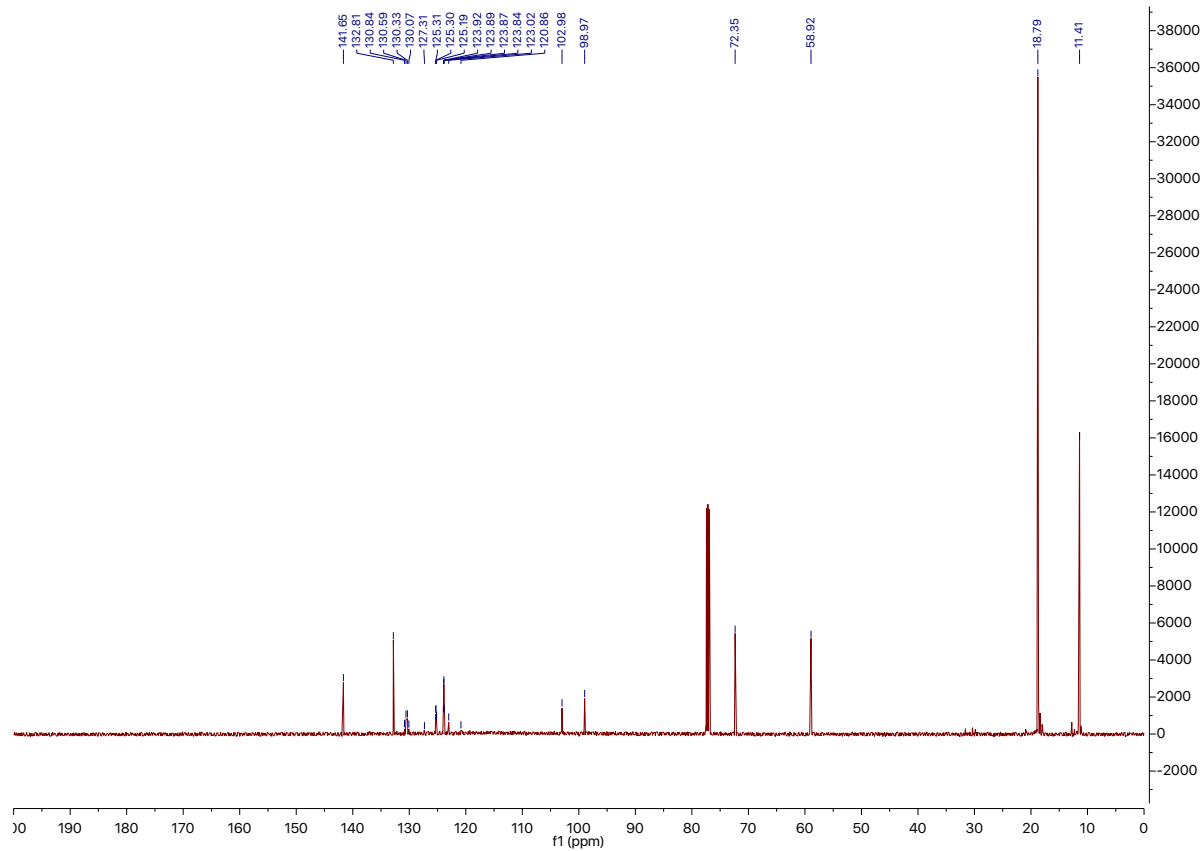

**Triisopropyl((5-isopropyl-2-(methoxymethyl)phenyl)ethynyl)silane (5p)**

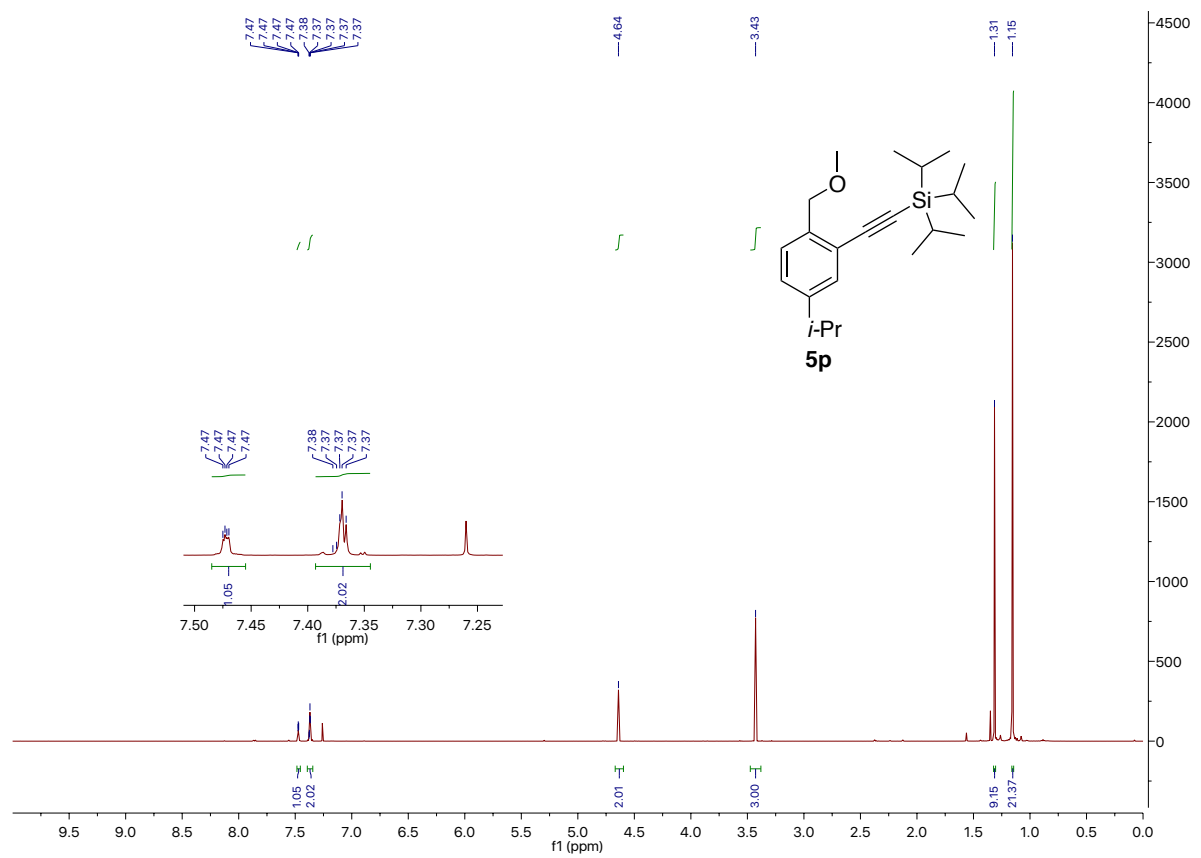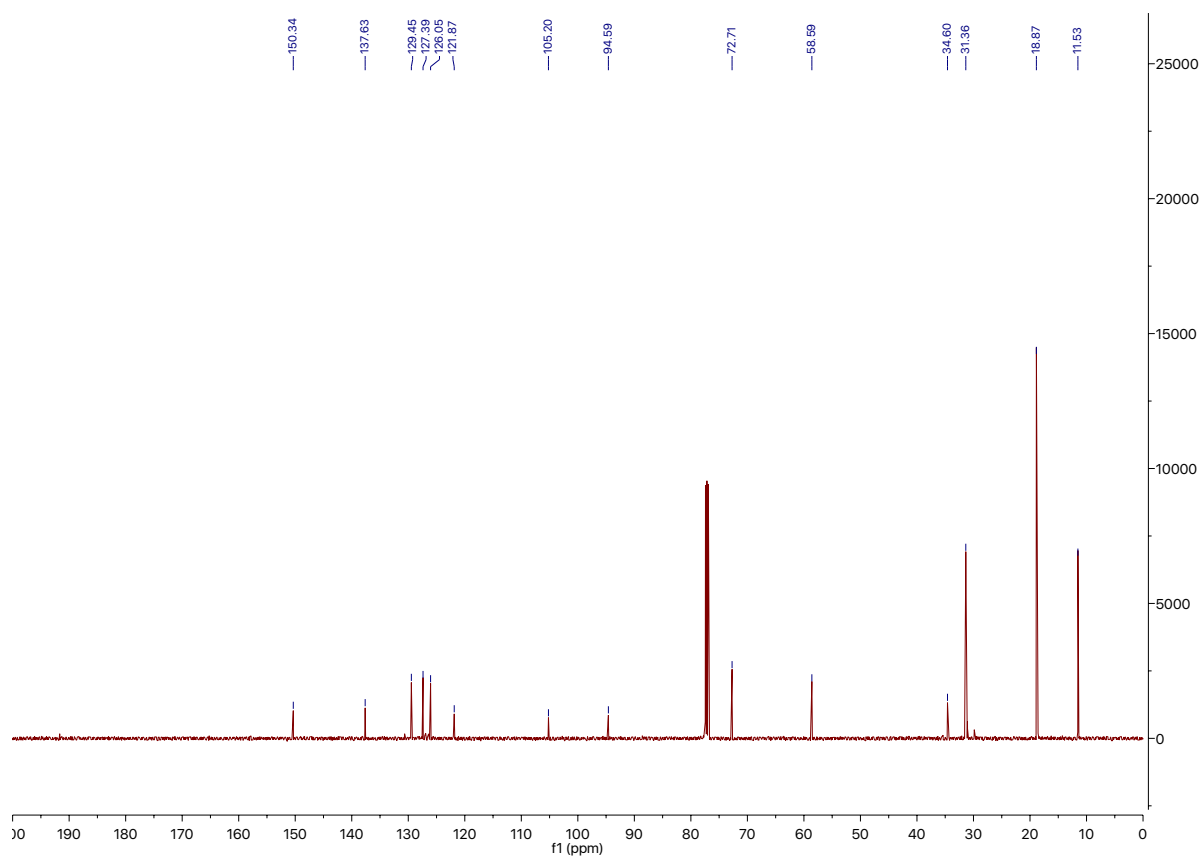

**((5-Fluoro-2-(methoxymethyl)phenyl)ethynyl)triisopropylsilane (5q)**

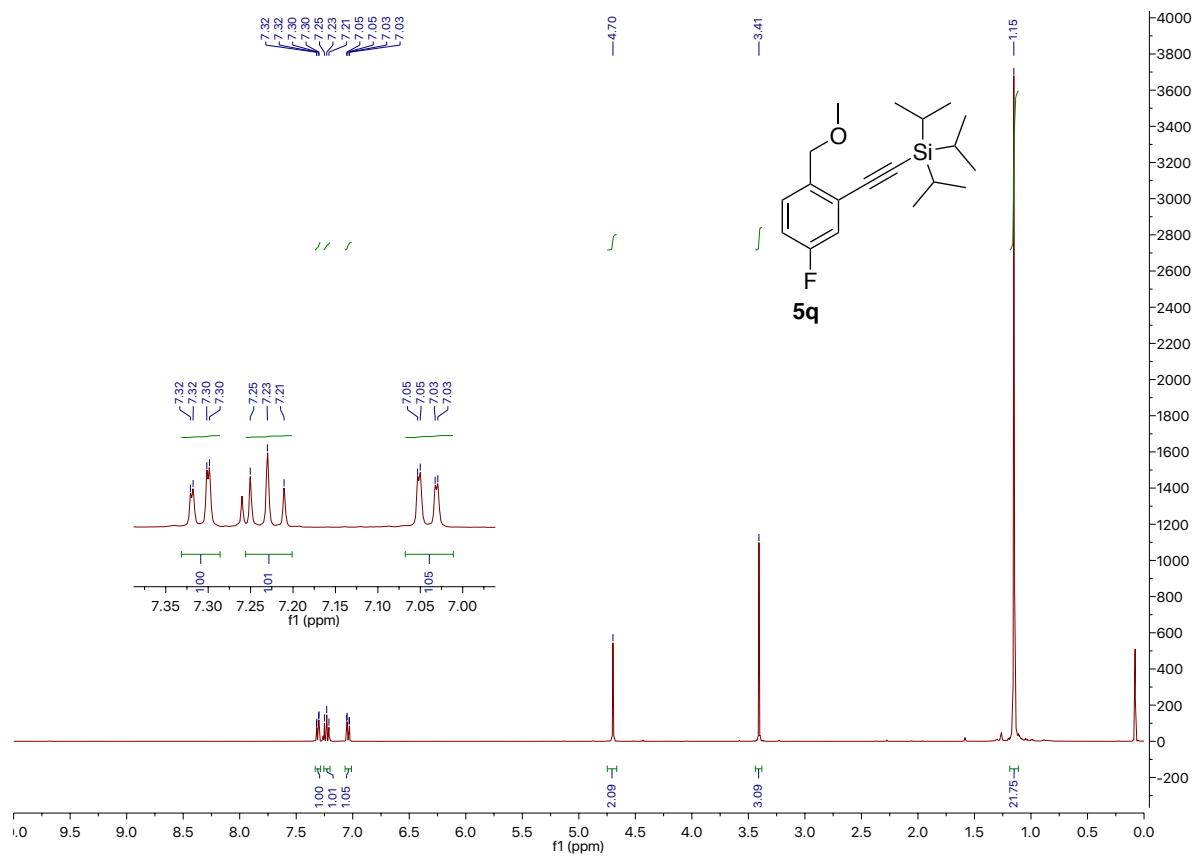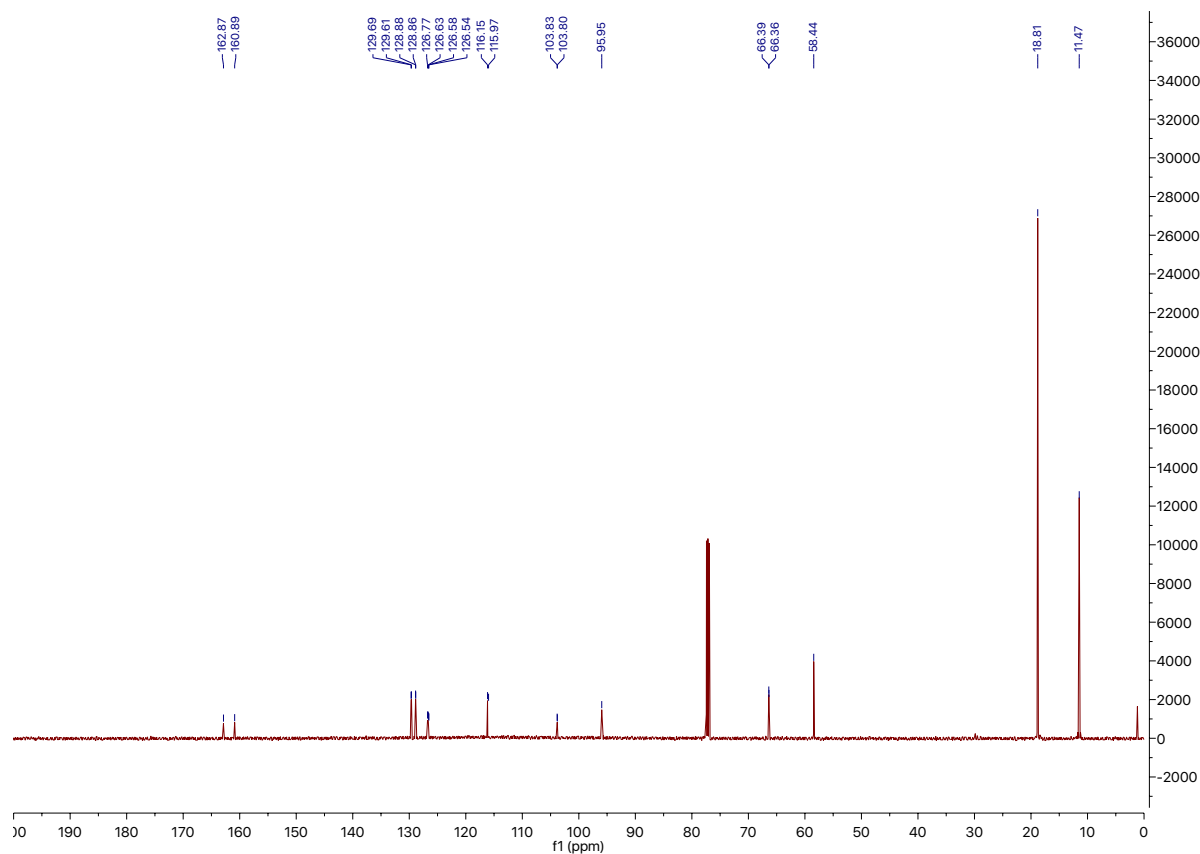

**((5-Chloro-2-(methoxymethyl)phenyl)ethynyl)triisopropylsilane (5r)**

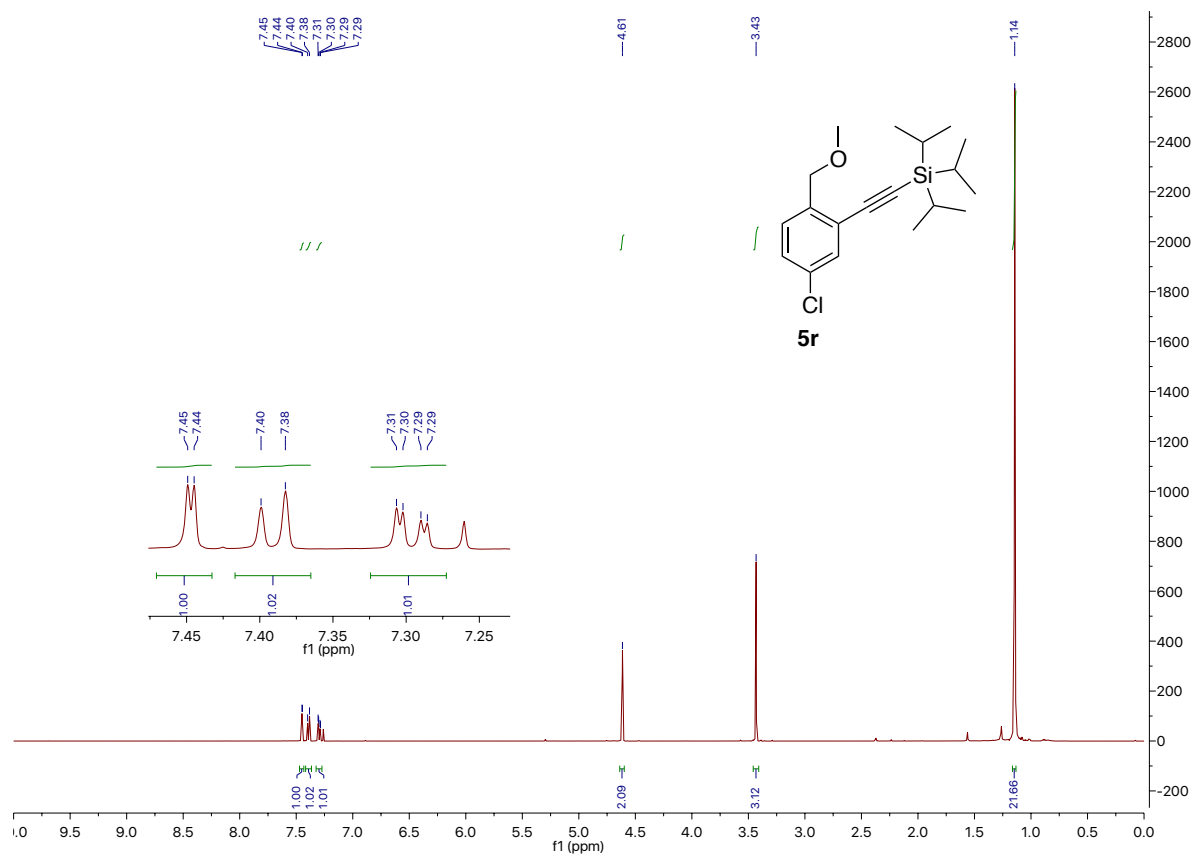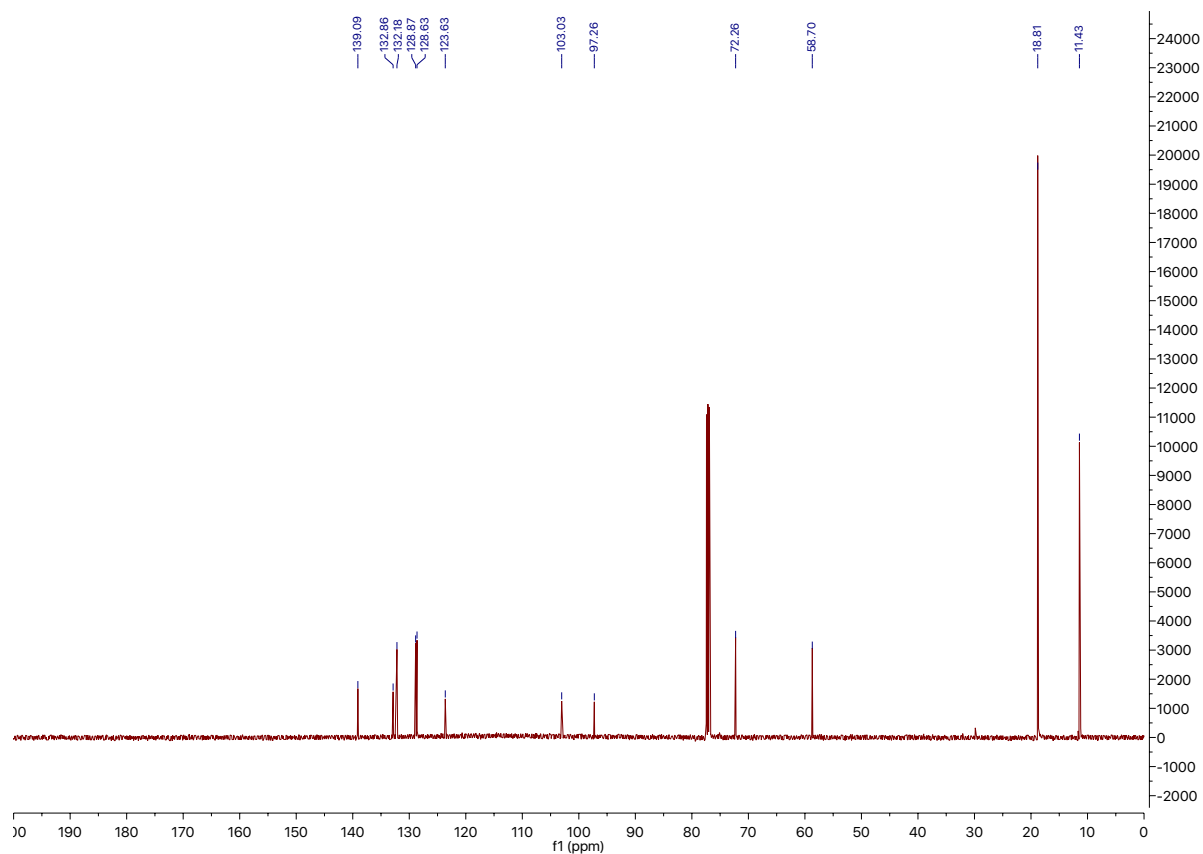

***((5-Chloro-2-(methoxymethyl)-1,3-phenylene)bis(ethyne-2,1-diyl))bis(triisopropylsilane) (5r<sup>2</sup>)***

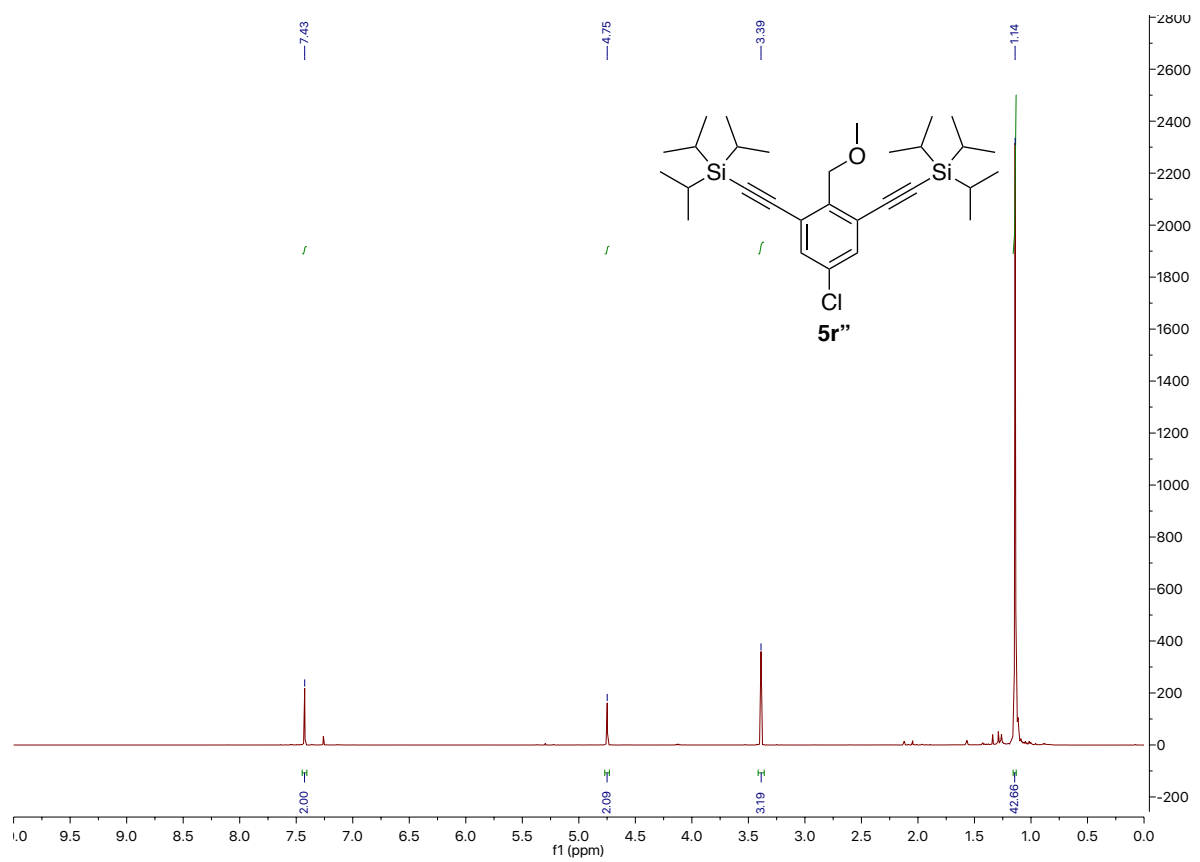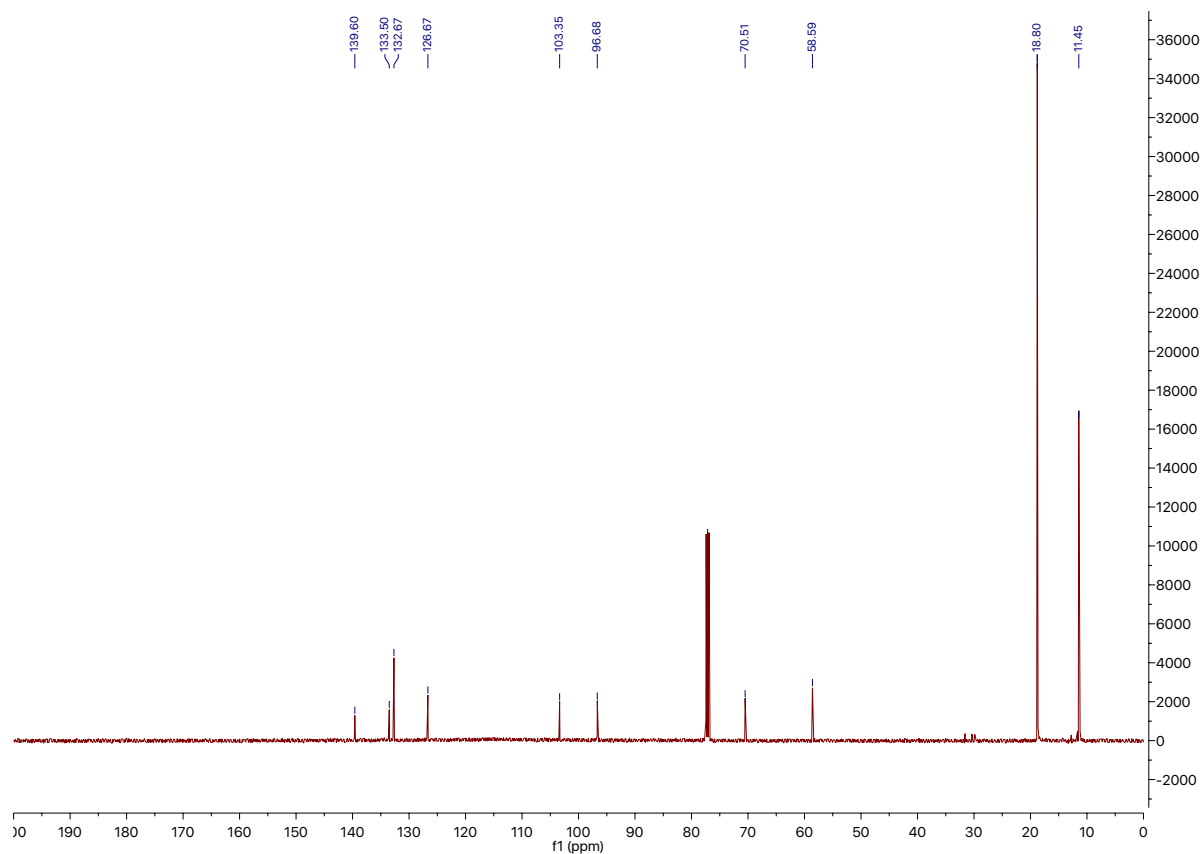

**((5-Bromo-2-(methoxymethyl)phenyl)ethynyl)triisopropylsilane (5s)**

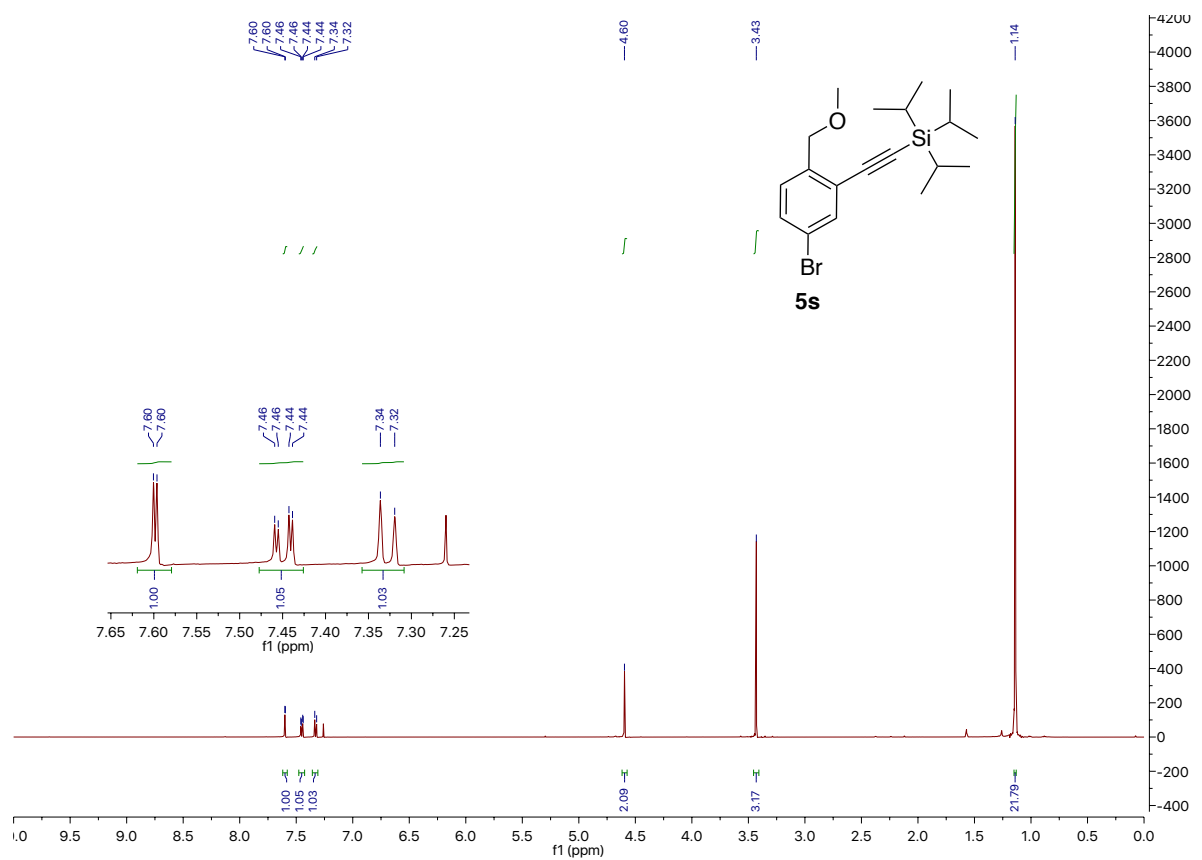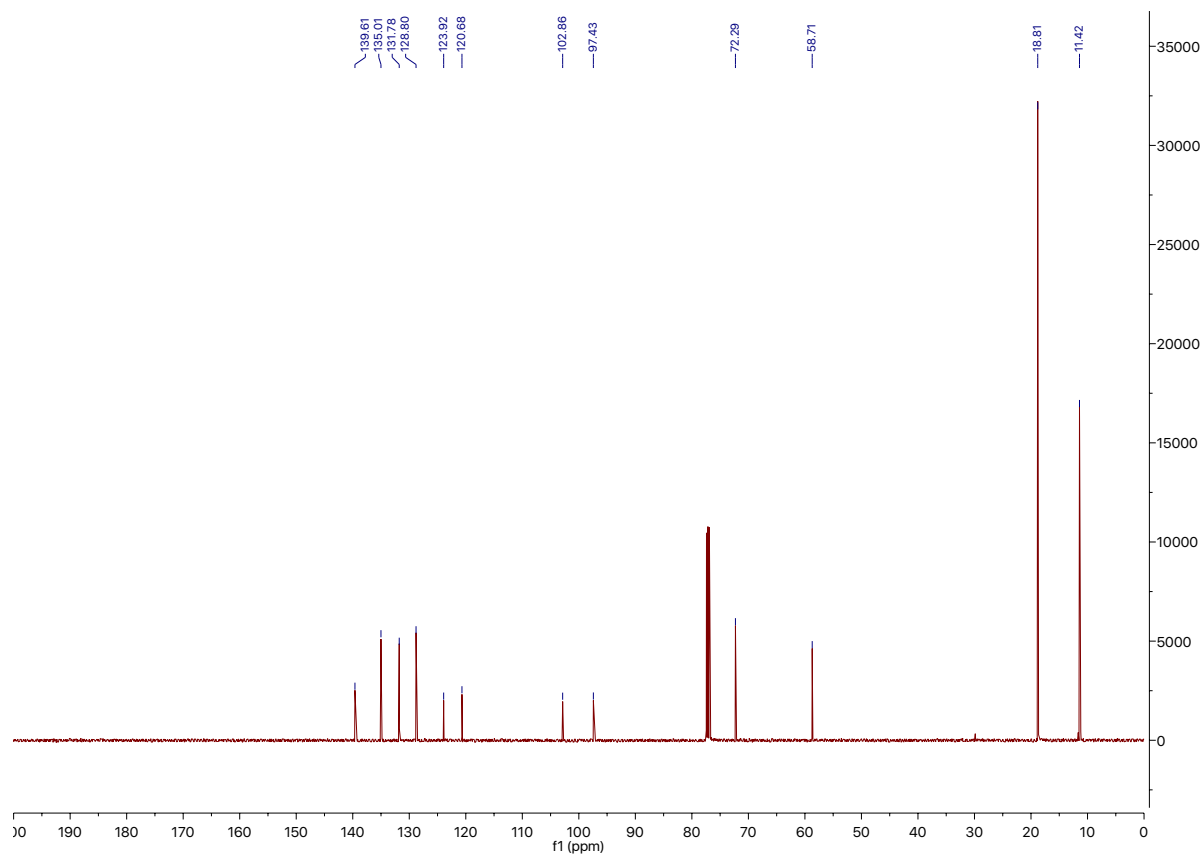

*((5-Bromo-2-(methoxymethyl)-1,3-phenylene)bis(ethyne-2,1-diyl))bis(triisopropylsilane) (5s'')*

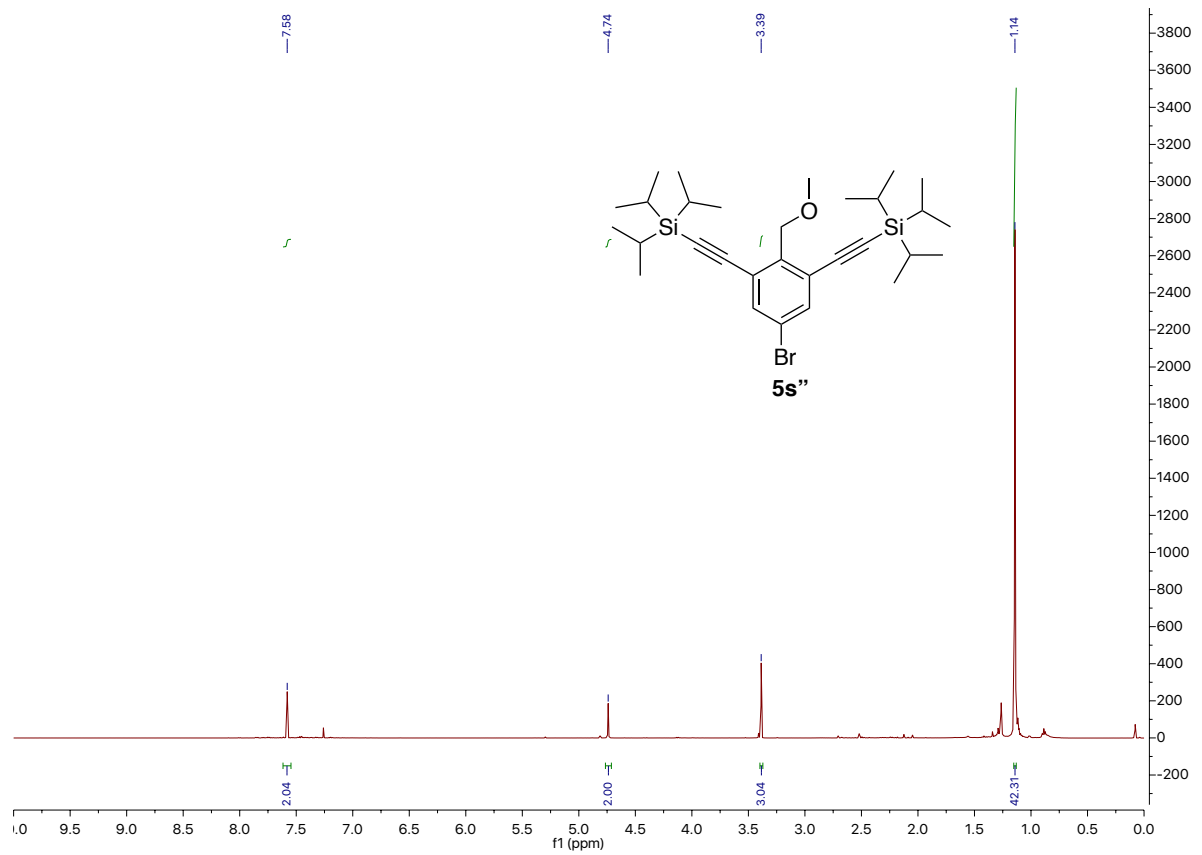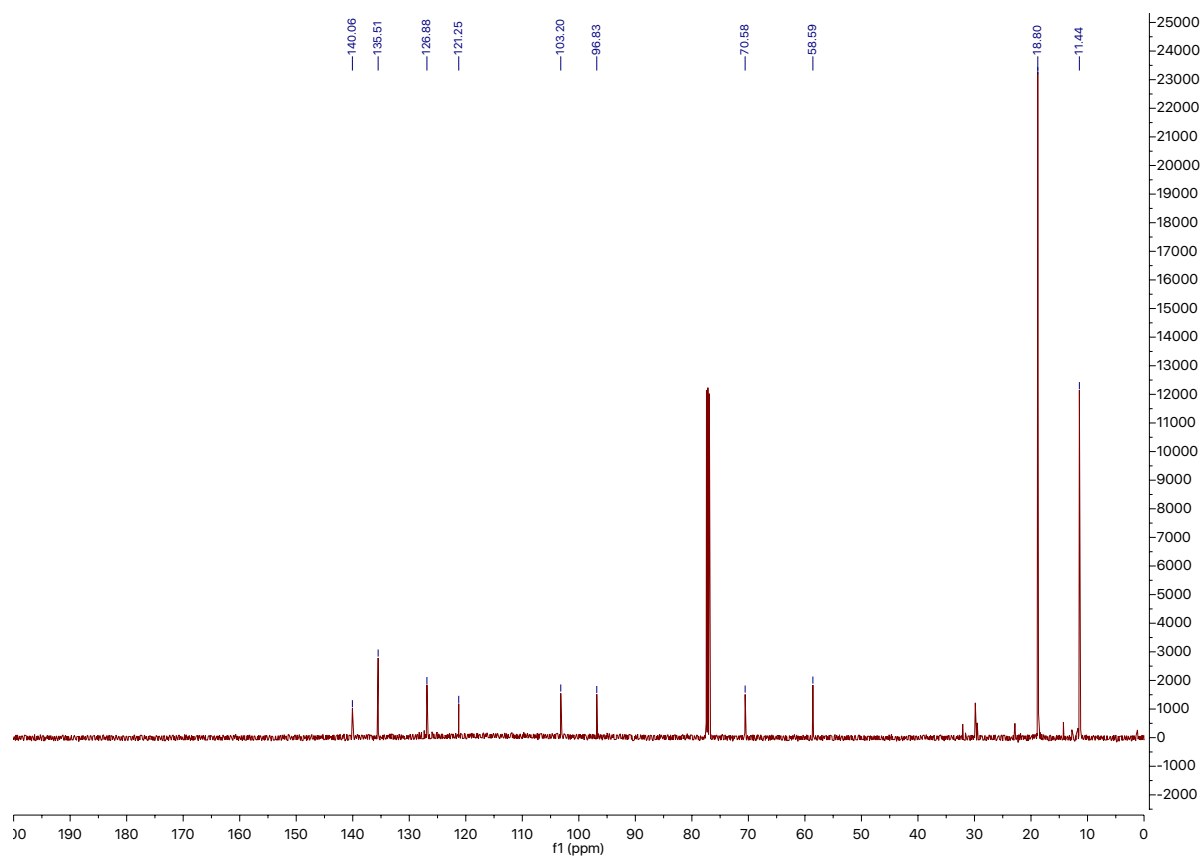

**((5-Iodo-2-(methoxymethyl)phenyl)ethynyl)triisopropylsilane (5t)**

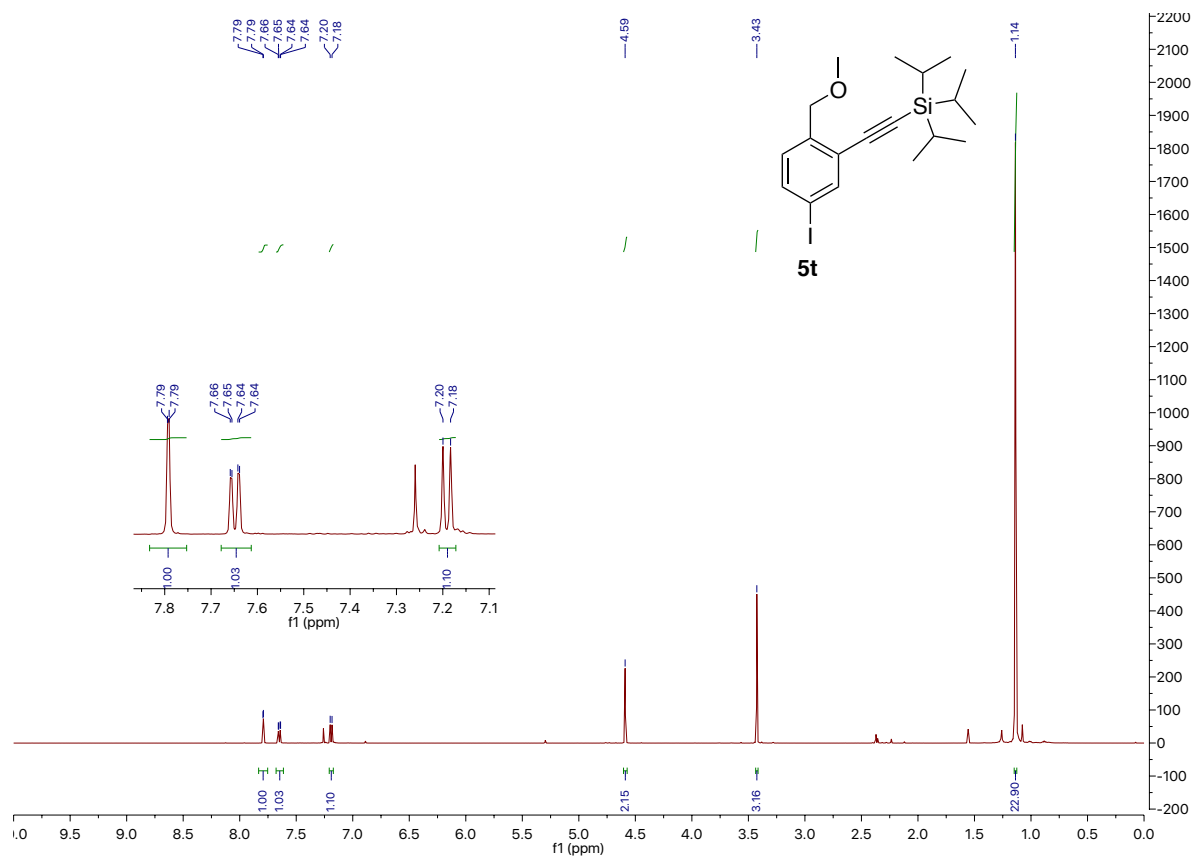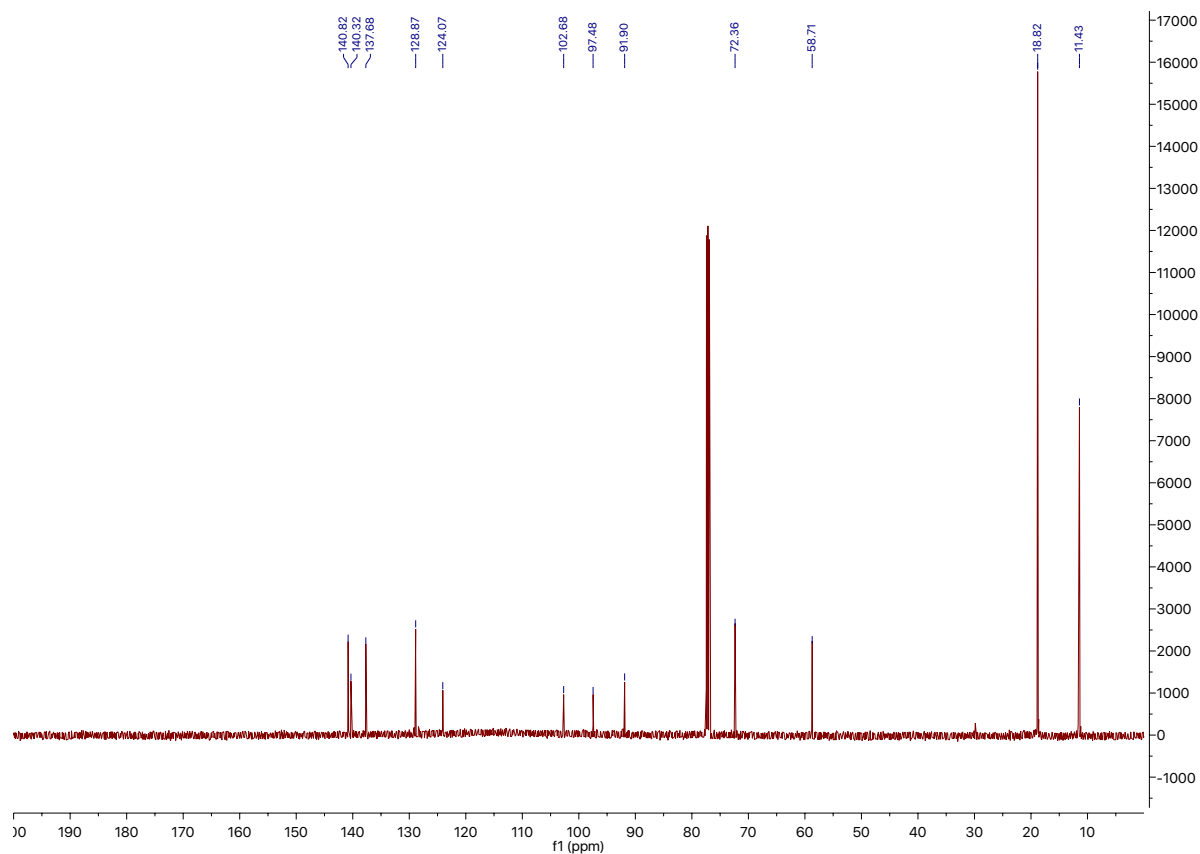



**Triisopropyl((2-(methoxymethyl)-5-(trifluoromethyl)phenyl)ethynyl)silane (5u)**

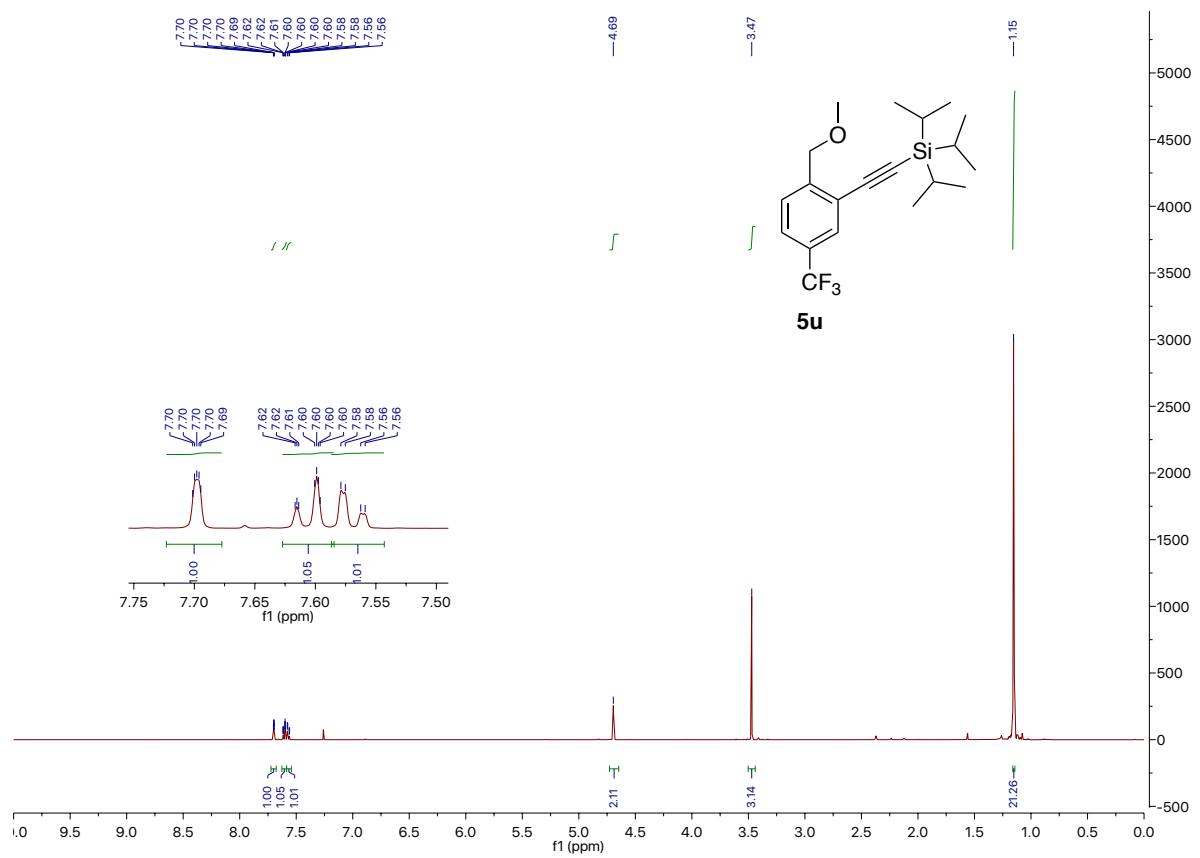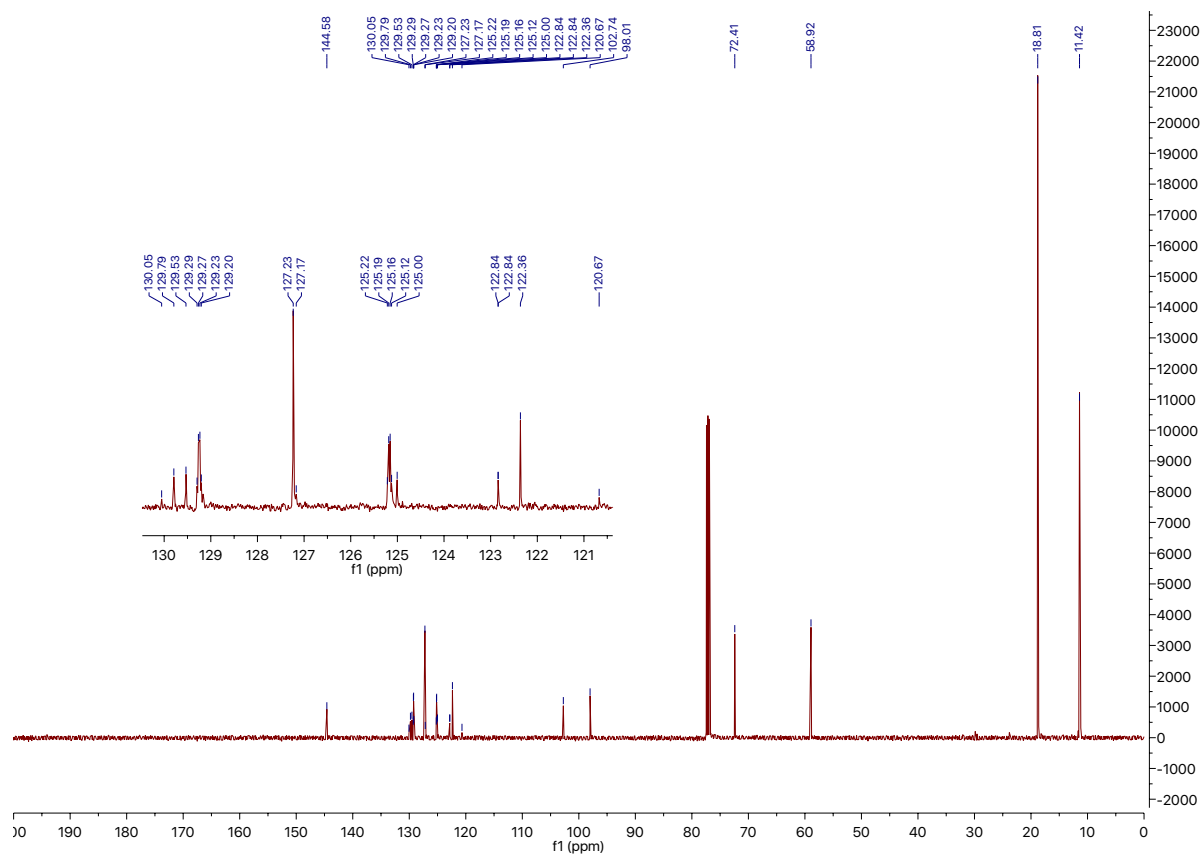

***((2-(Methoxymethyl)-5-(trifluoromethyl)-1,3-phenylene)bis(ethyne-2,1-diyl))bis(triisopropylsilane) (5u'')***

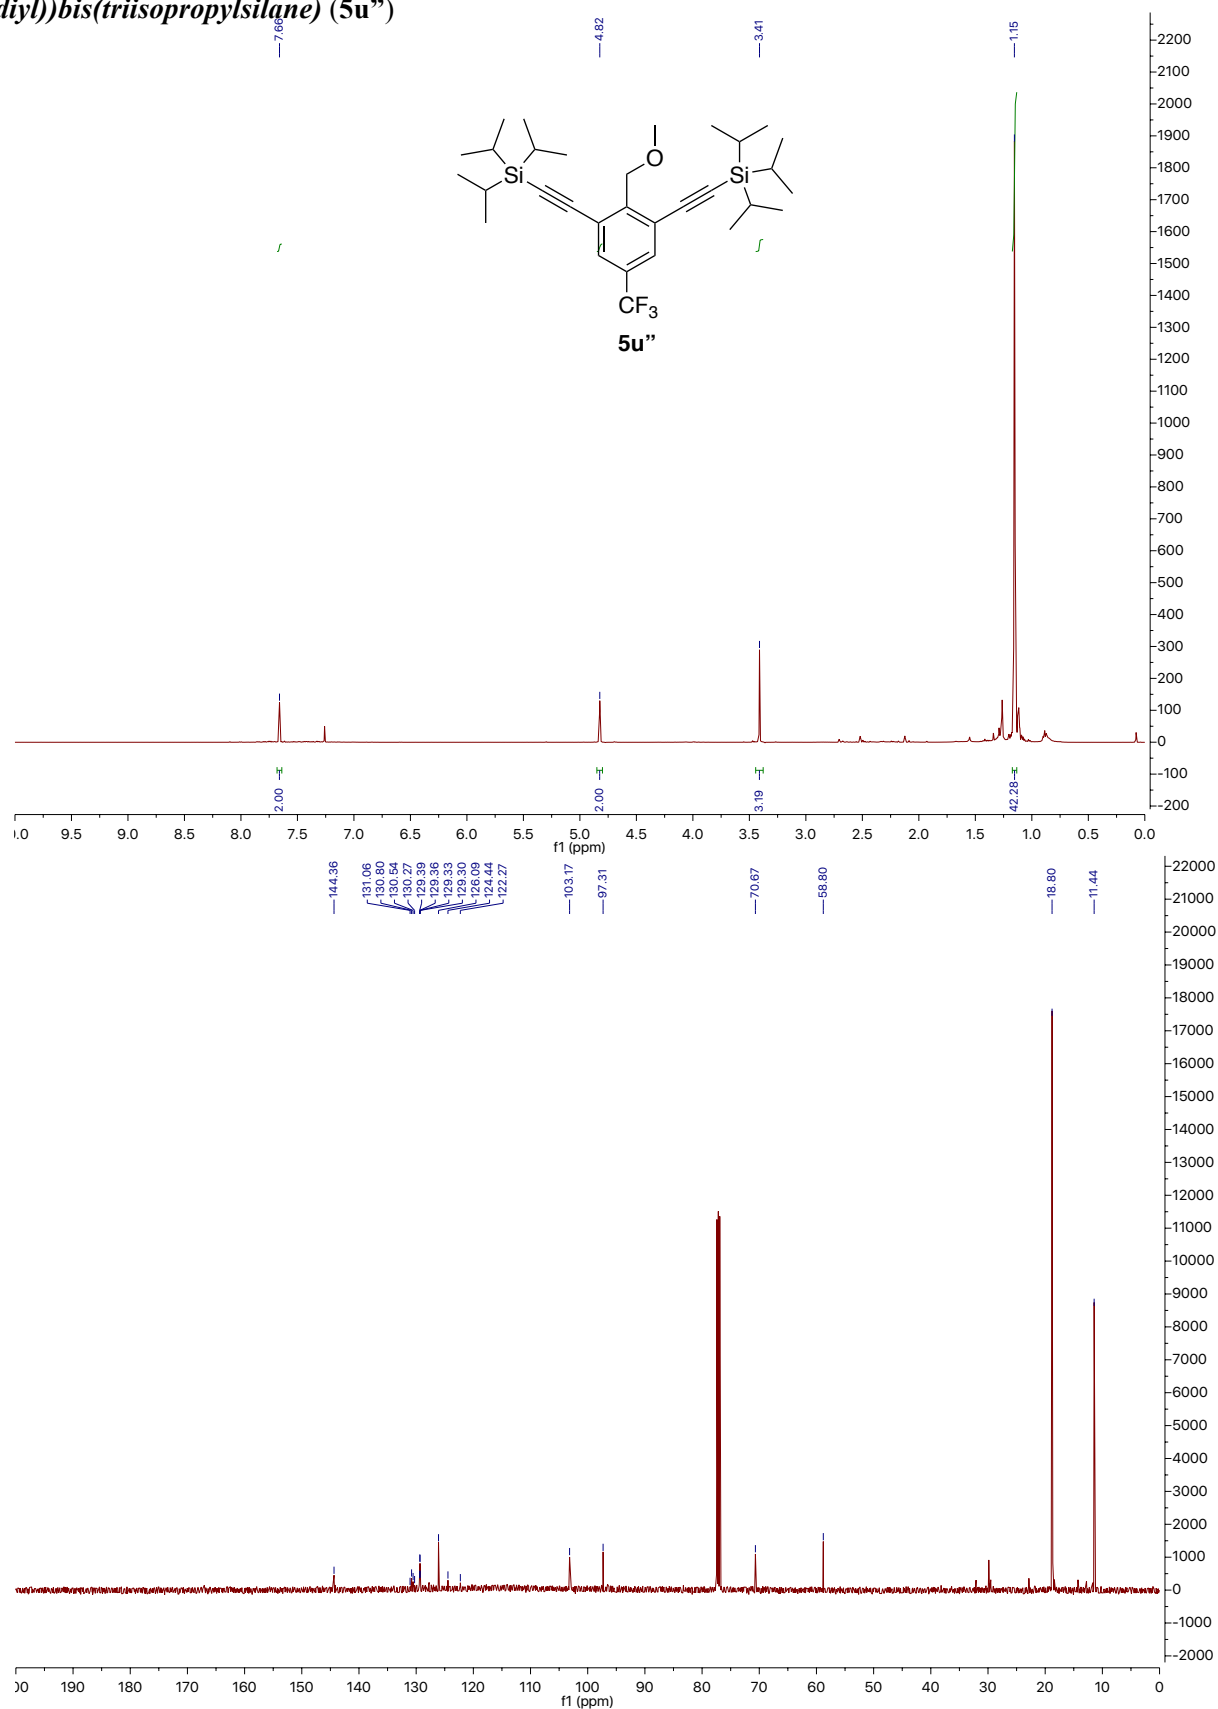

**Triisopropyl((3-(methoxymethyl)naphthalen-2-yl)ethynyl)silane (5v)**

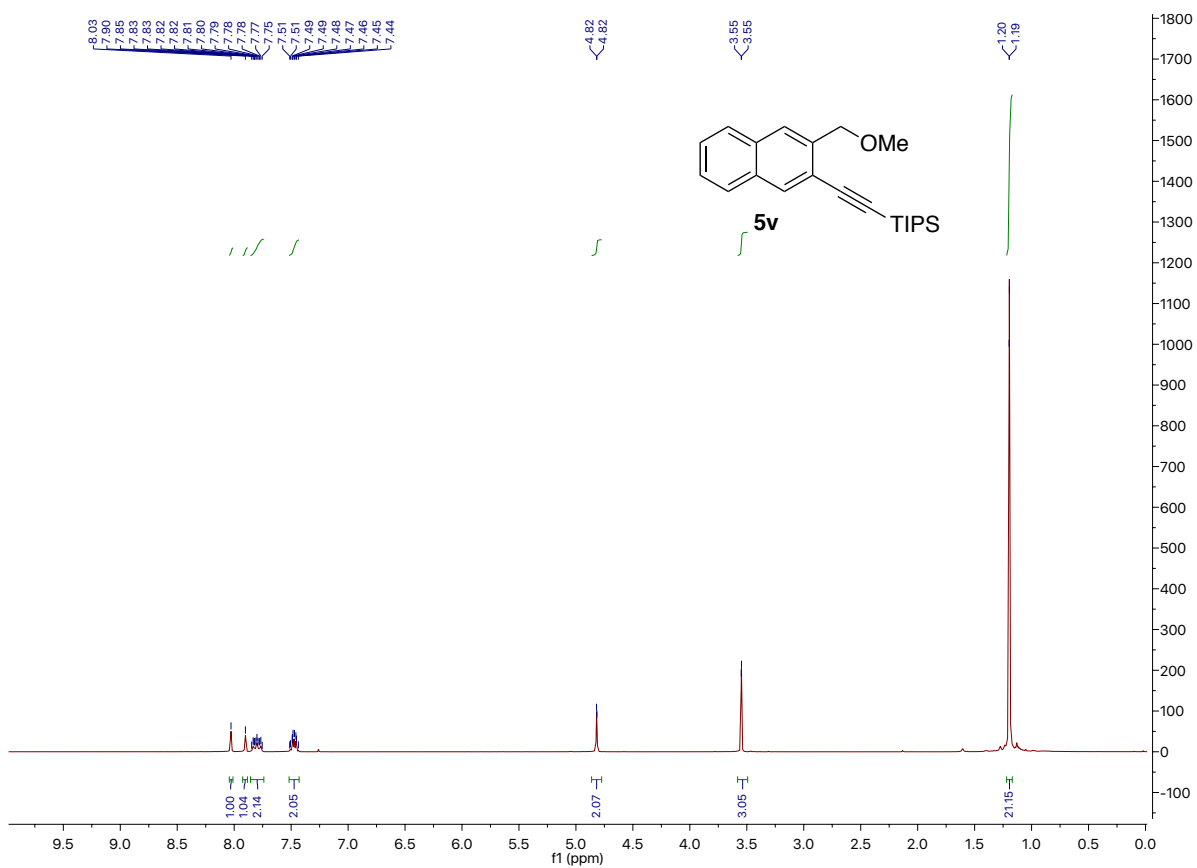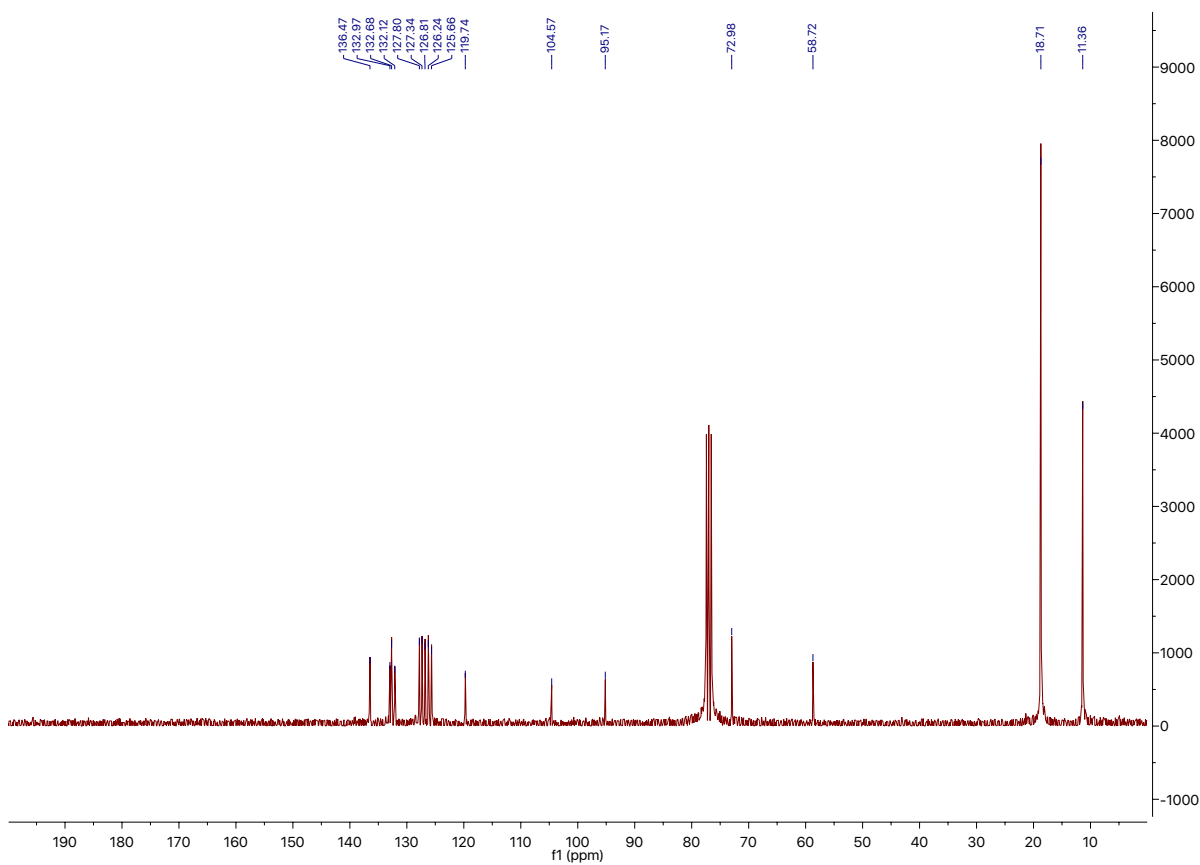

**Triisopropyl((3-(methoxymethyl)thiophen-2-yl)ethynyl)silane (5w)**

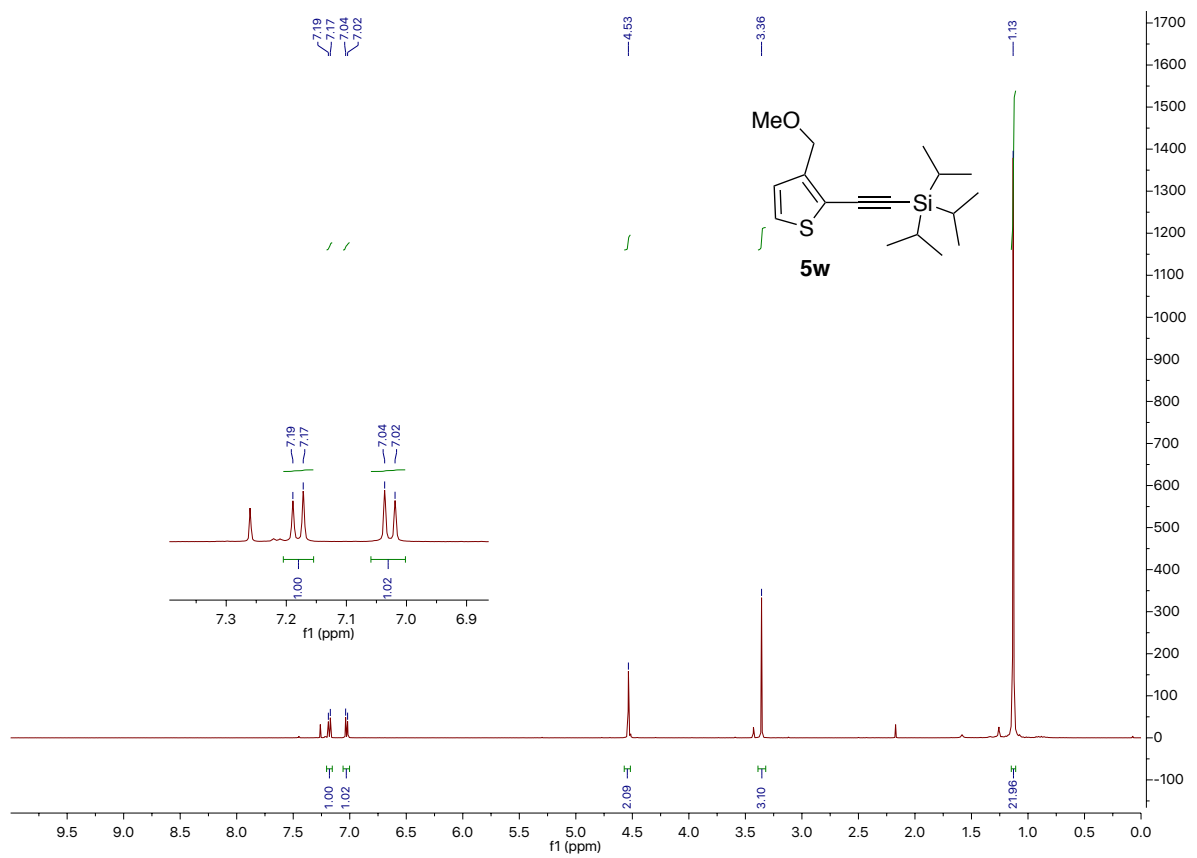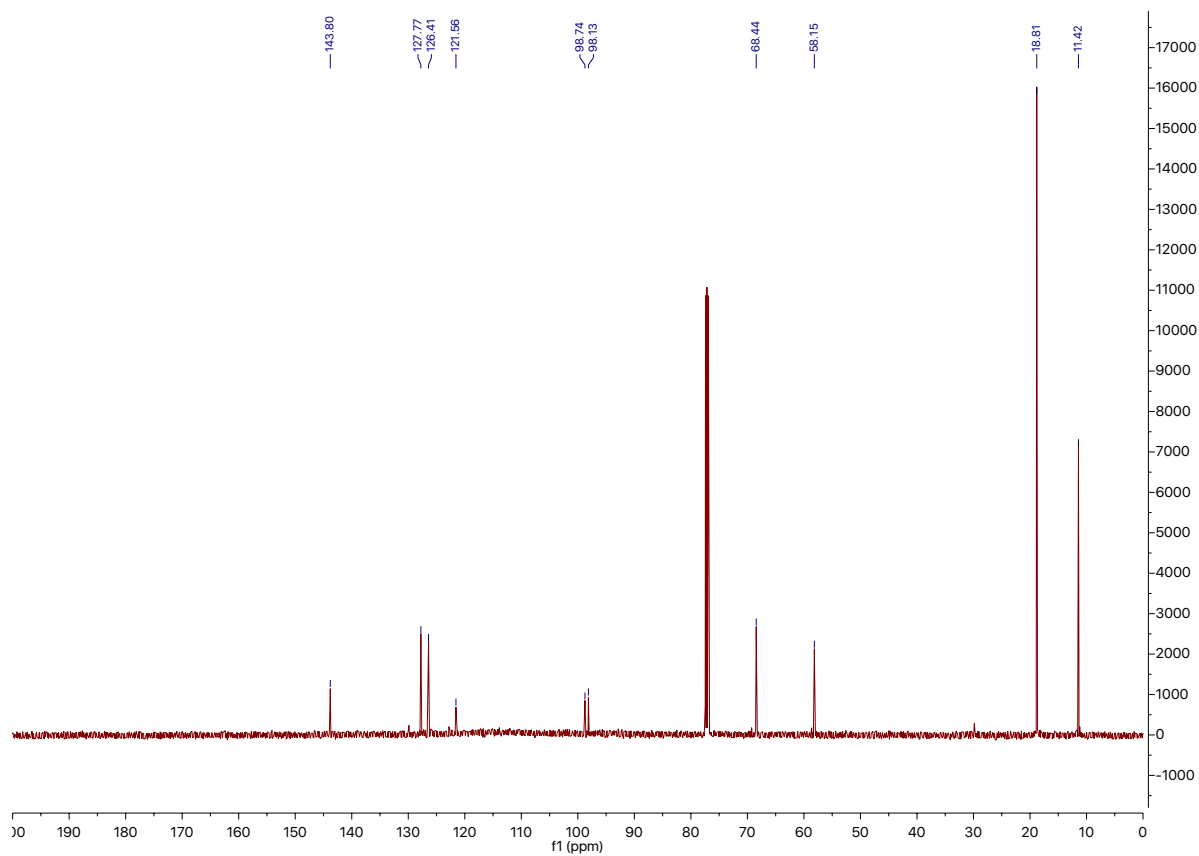

**2,2-Dimethyl-1-(2-((triisopropylsilyl)ethynyl)phenyl)propan-1-one (7a)**

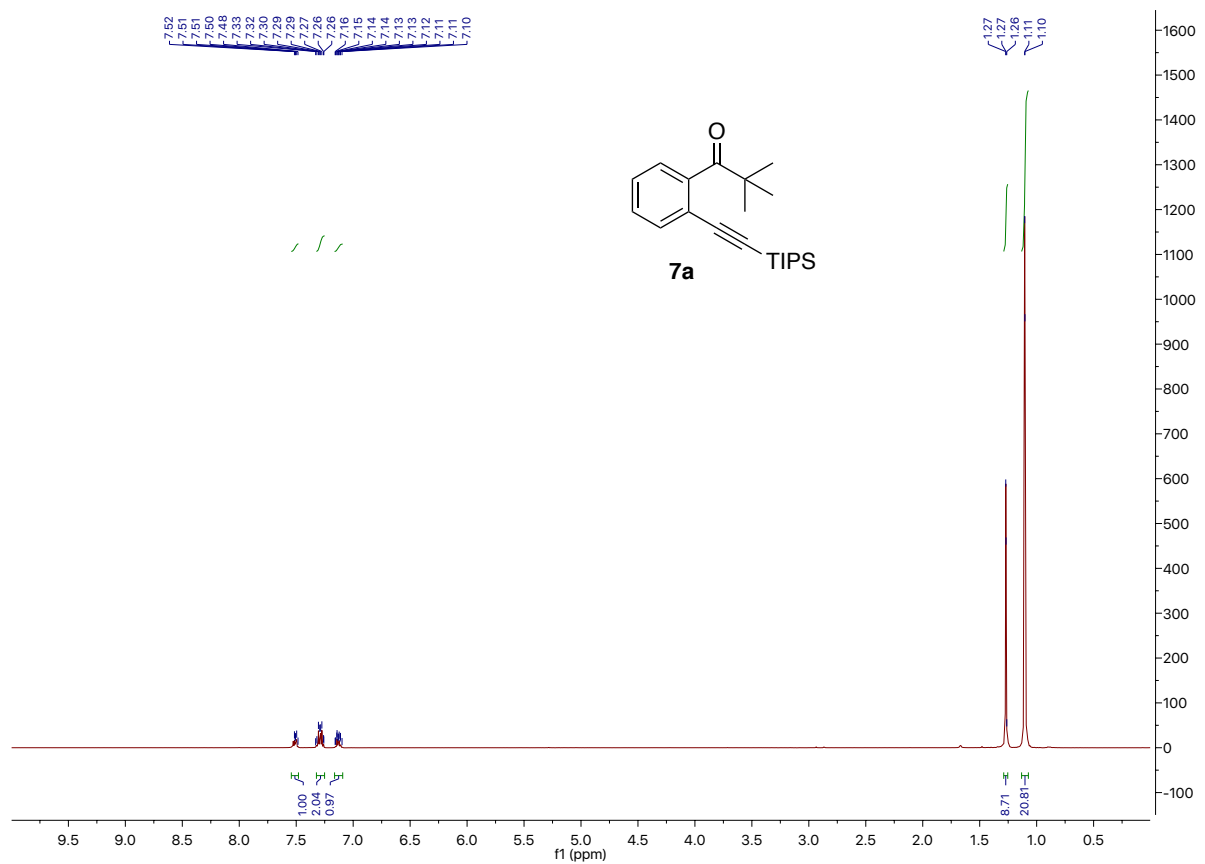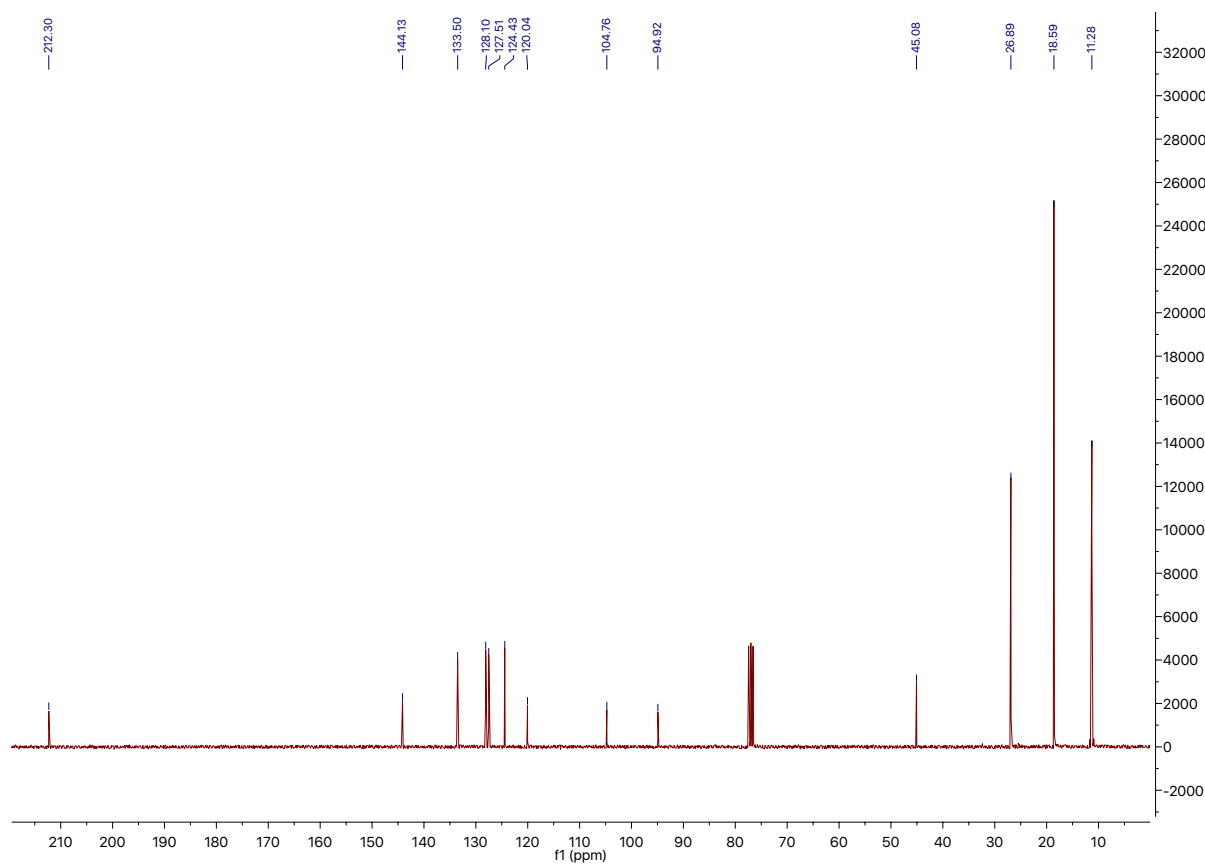

**2,2,2-Trifluoro-1-(2-((triisopropylsilyl)ethynyl)phenyl)ethan-1-one (7b)**

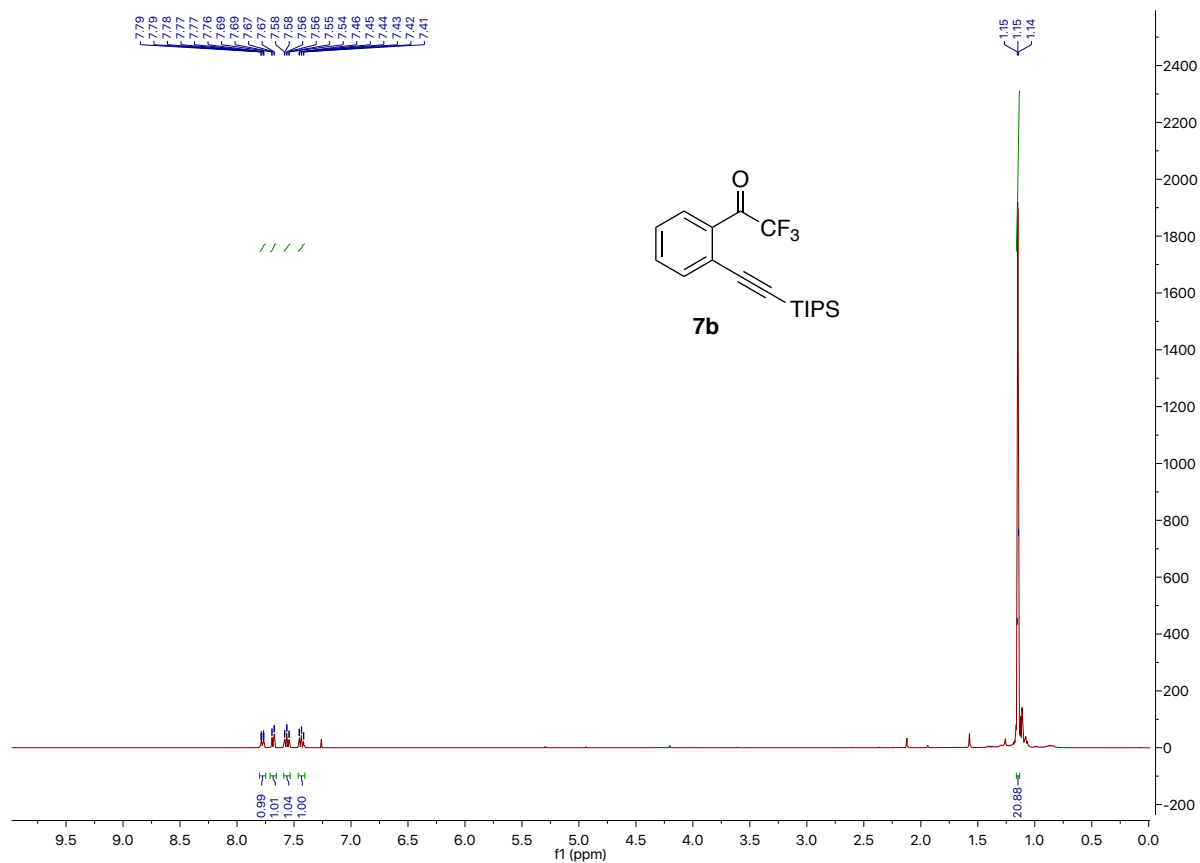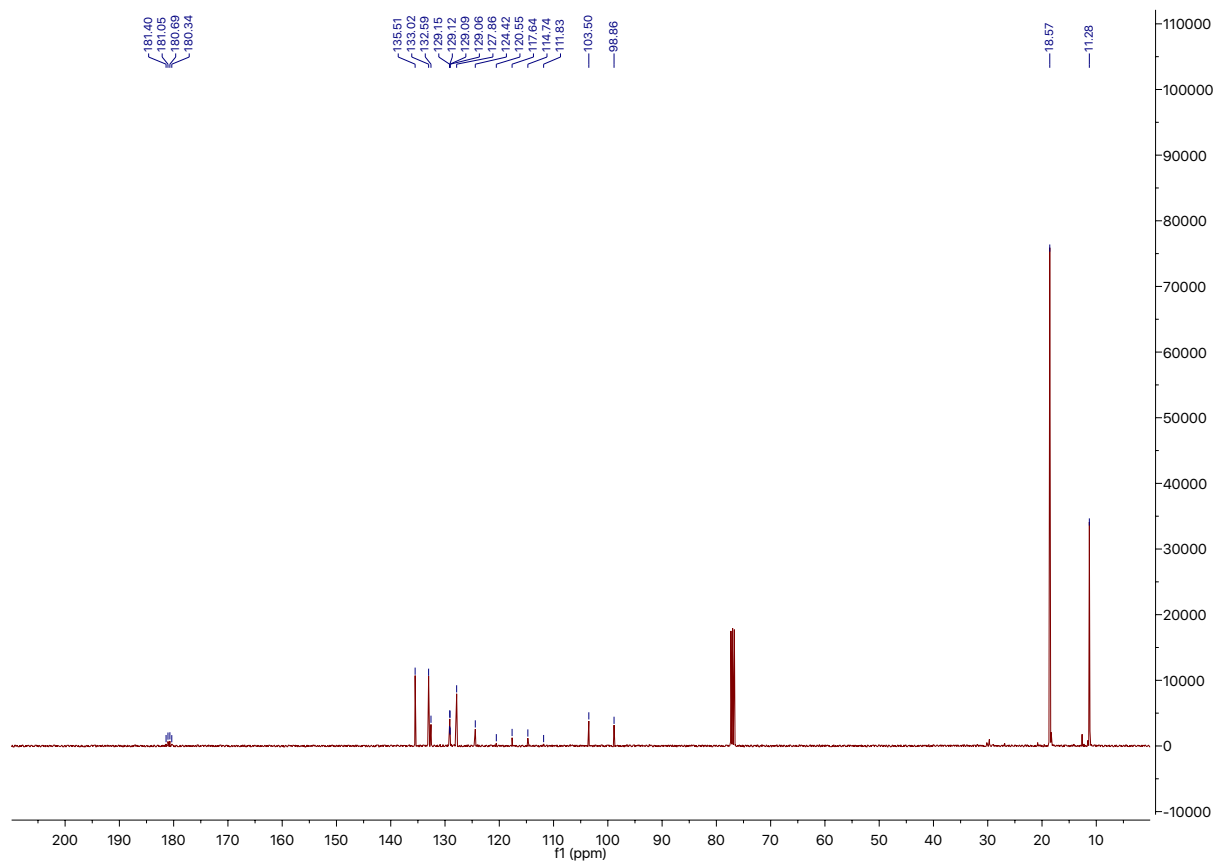

# 2-((Triisopropylsilyl)ethynyl)benzoyl ferrocene (7c)

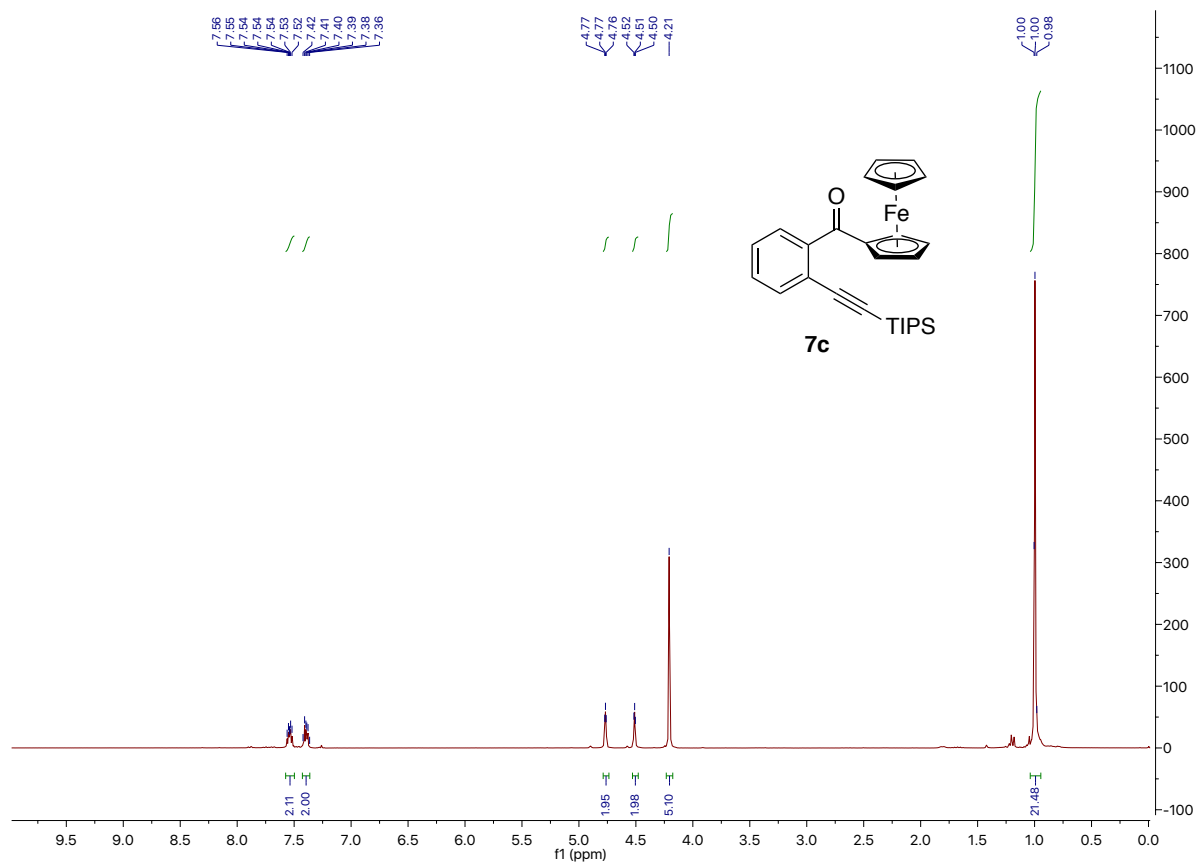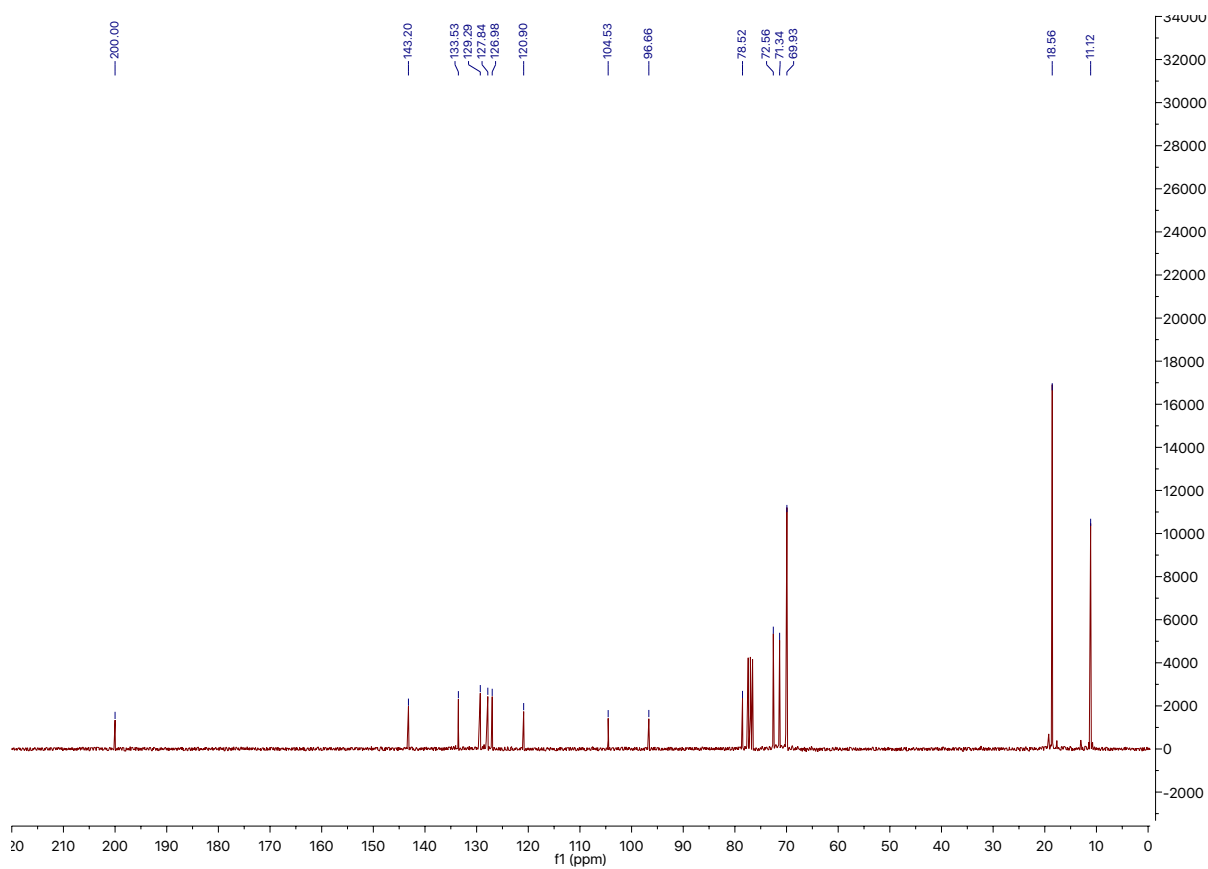

**1-(2-Methyl-6-((triisopropylsilyl)ethynyl)phenyl)ethan-1-one (7d)**

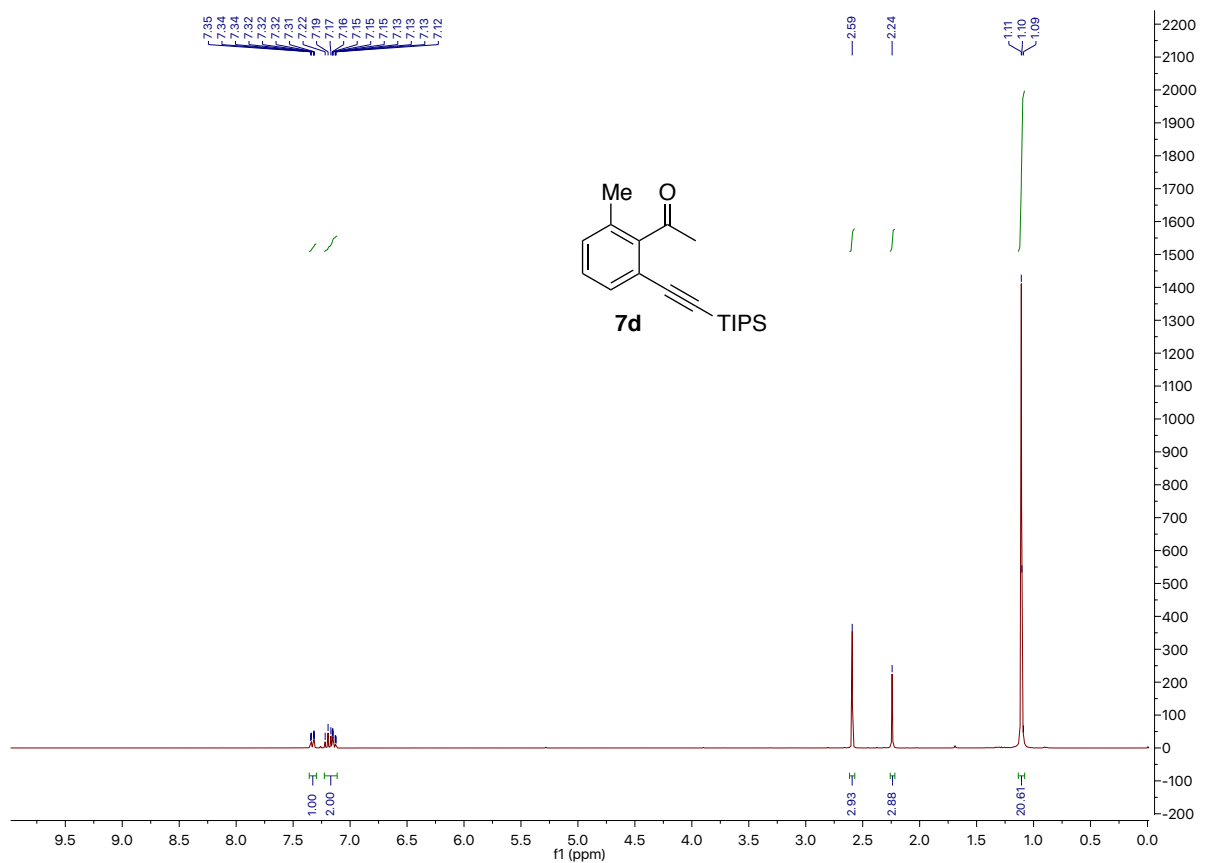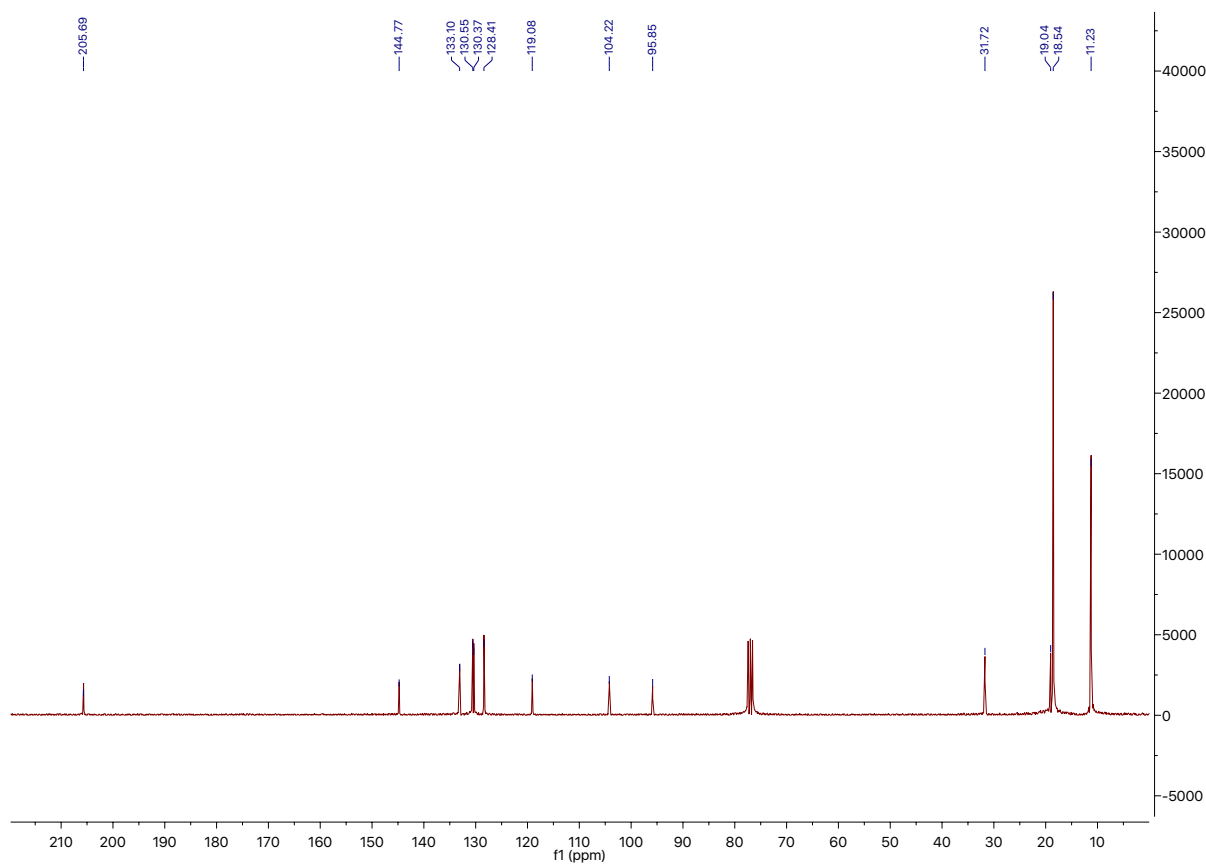



**1-(2-Chloro-6-((triisopropylsilyl)ethynyl)phenyl)ethan-1-one (7e)**

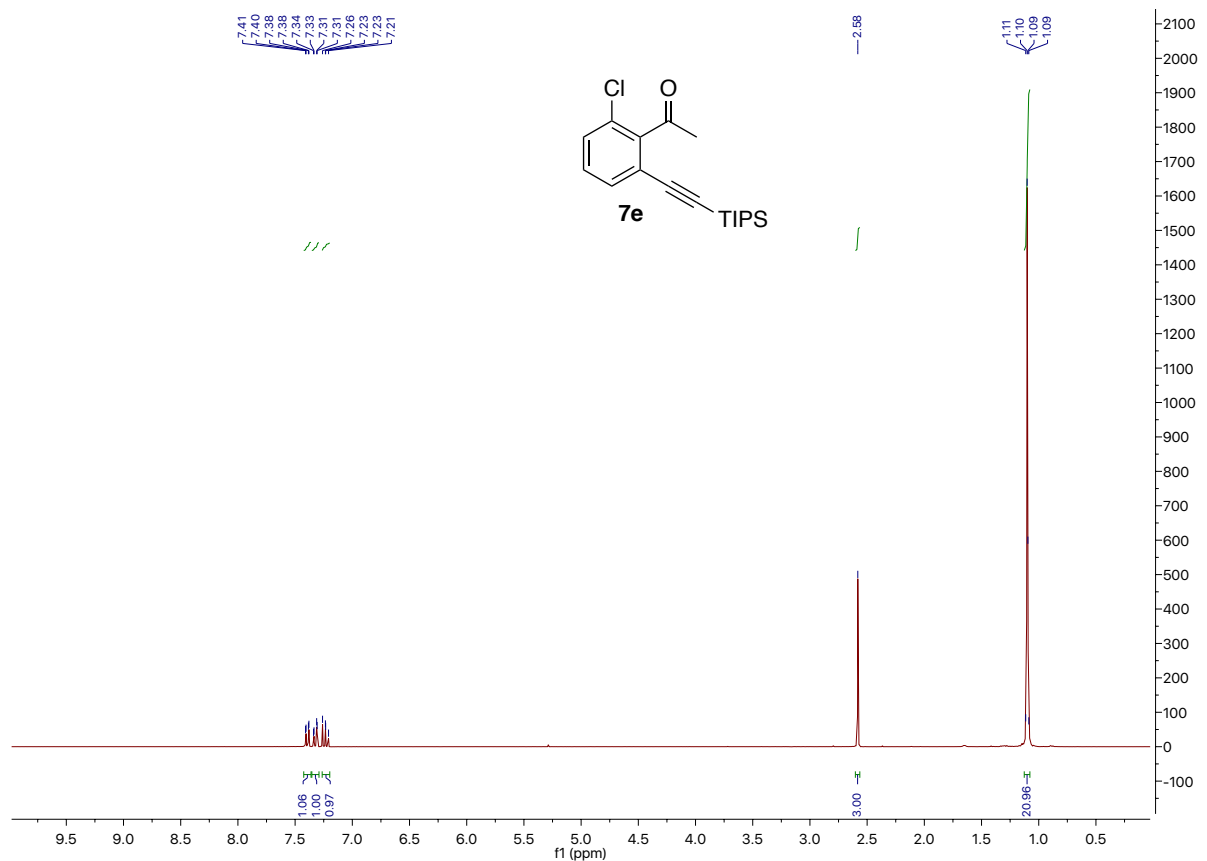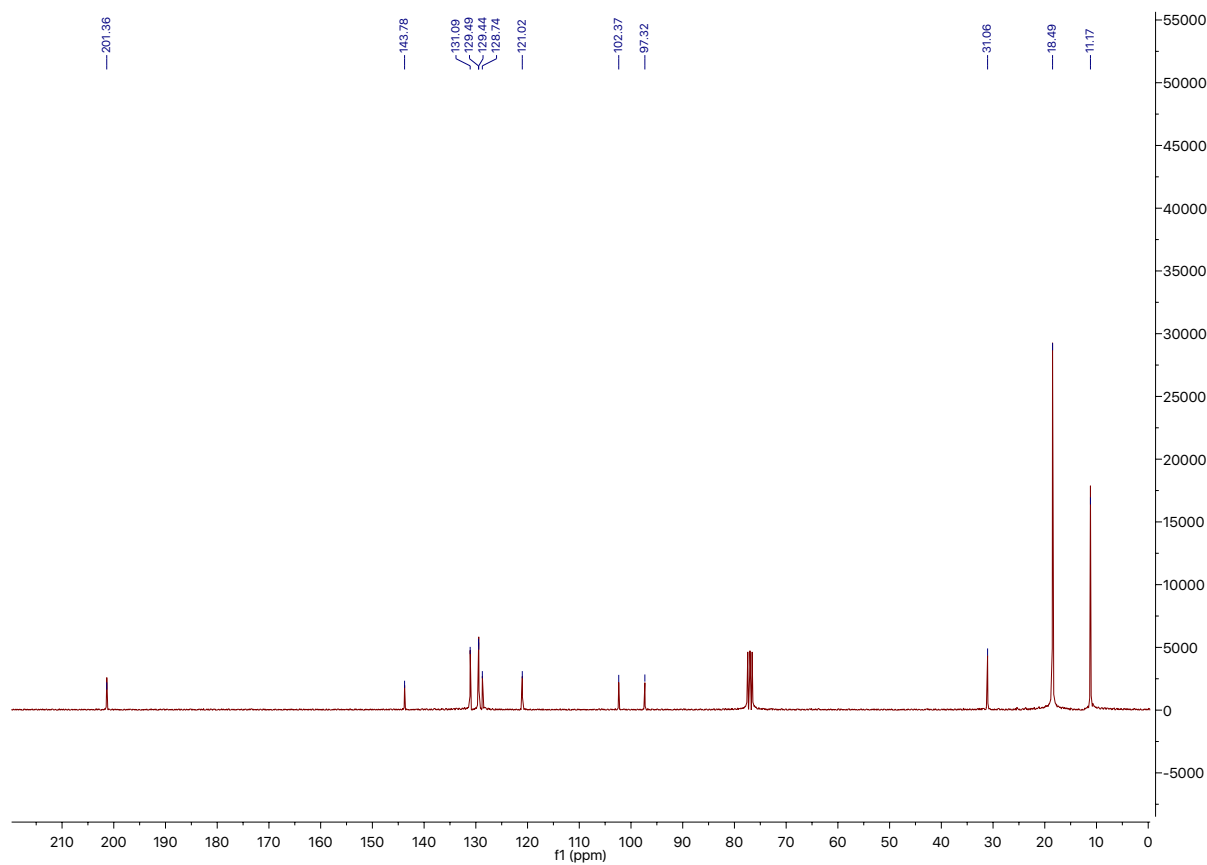

**1-(2-Bromo-6-((triisopropylsilyl)ethynyl)phenyl)ethan-1-one (7f)**

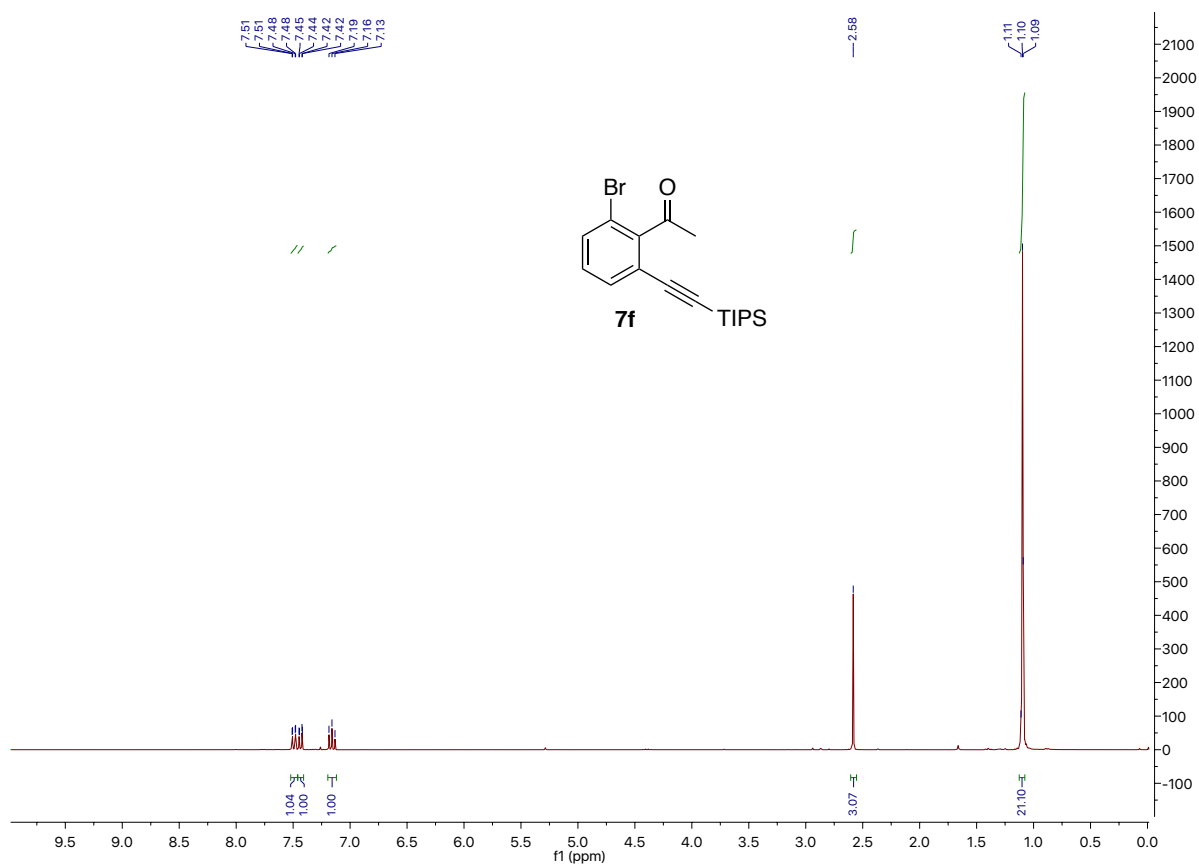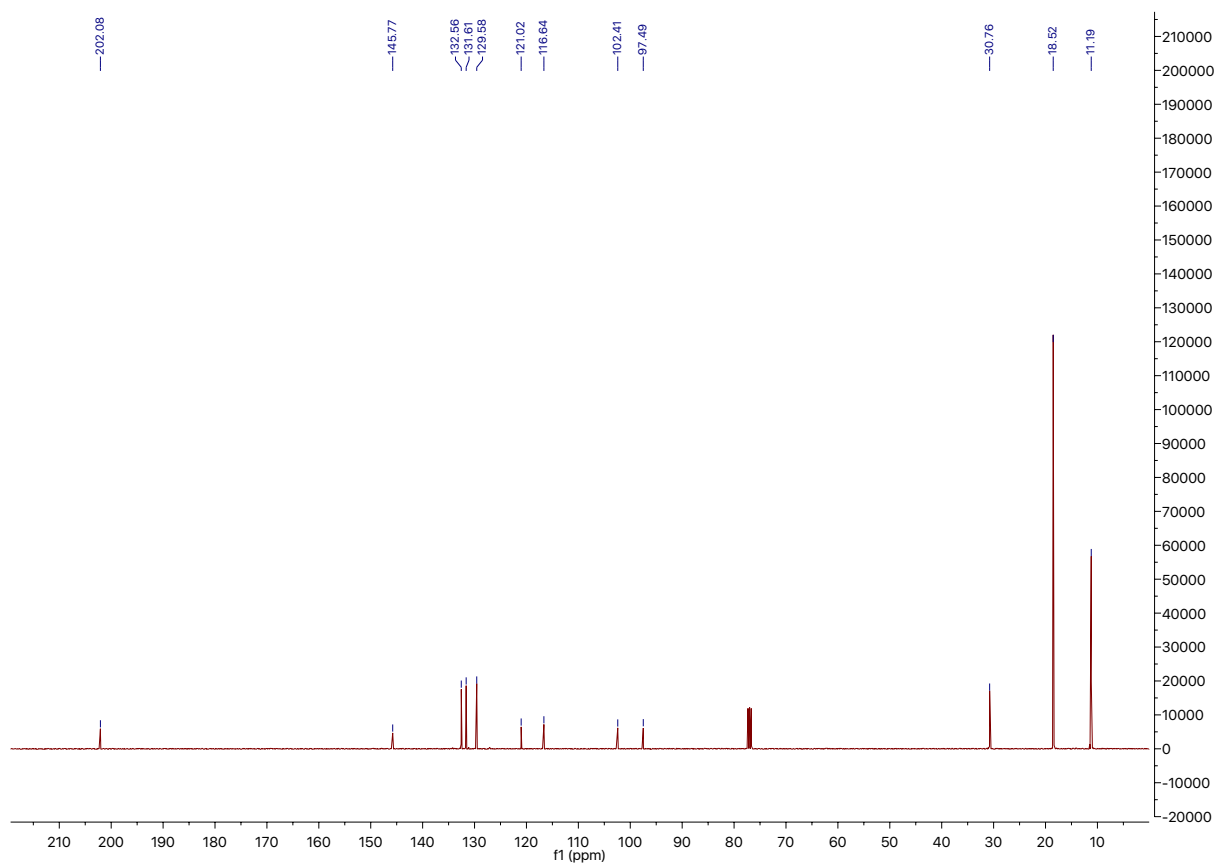

**1-(2-Iodo-6-((triisopropylsilyl)ethynyl)phenyl)ethan-1-one (7g)**

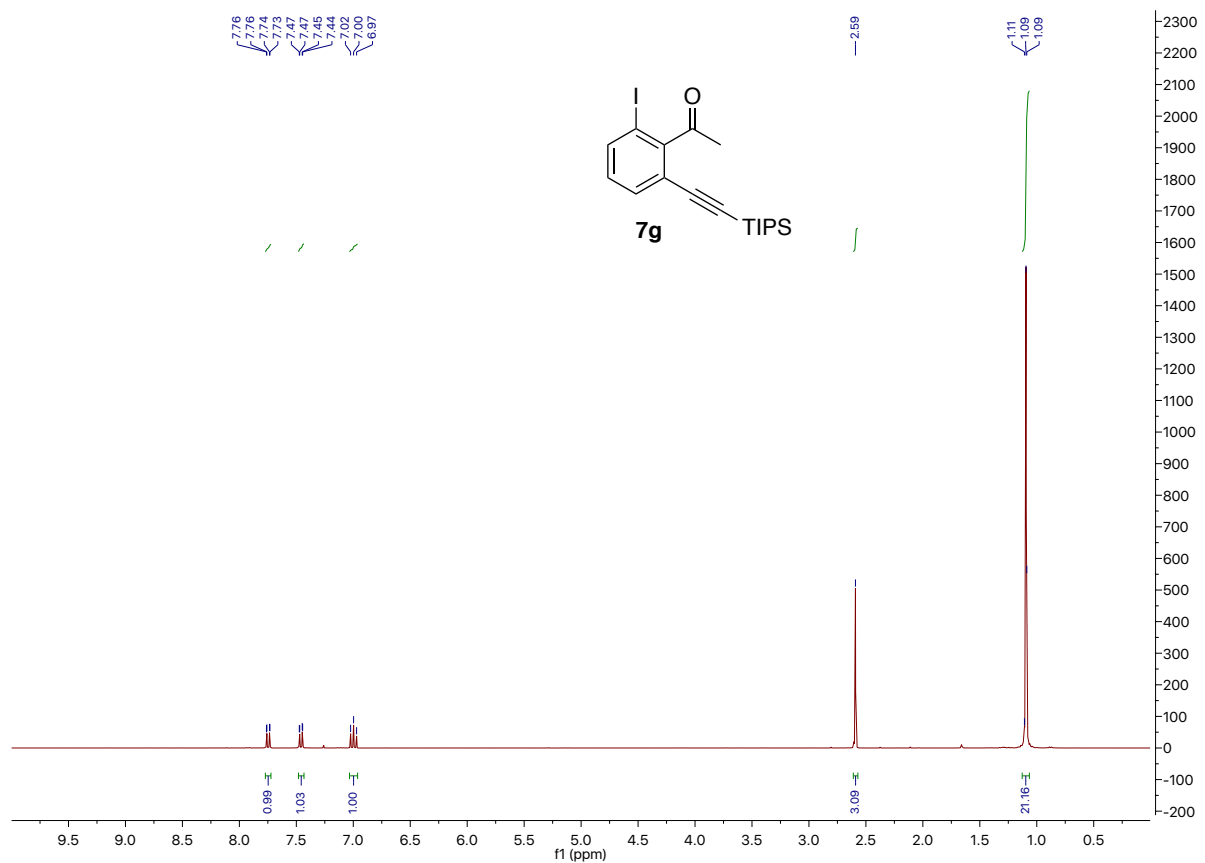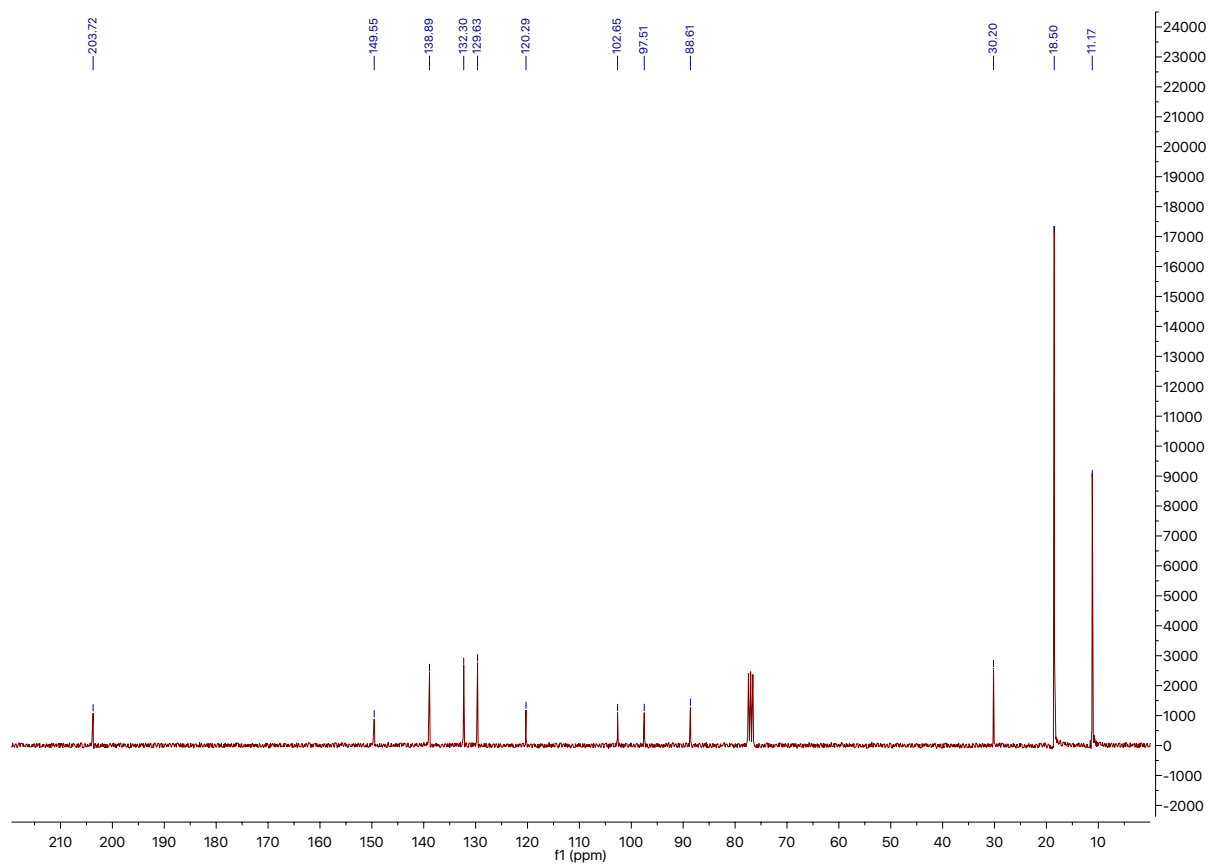

**1-(2-Methoxy-6-((triisopropylsilyl)ethynyl)phenyl)ethan-1-one (7h)**

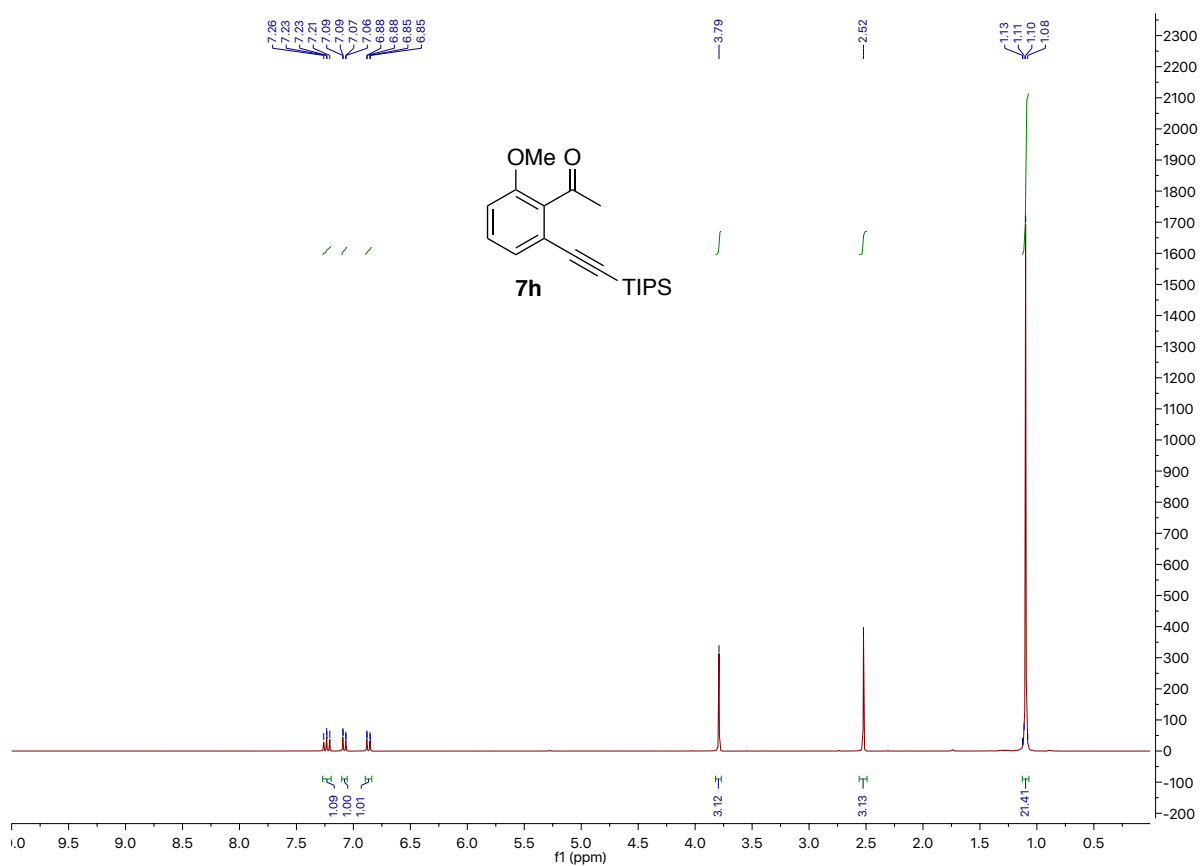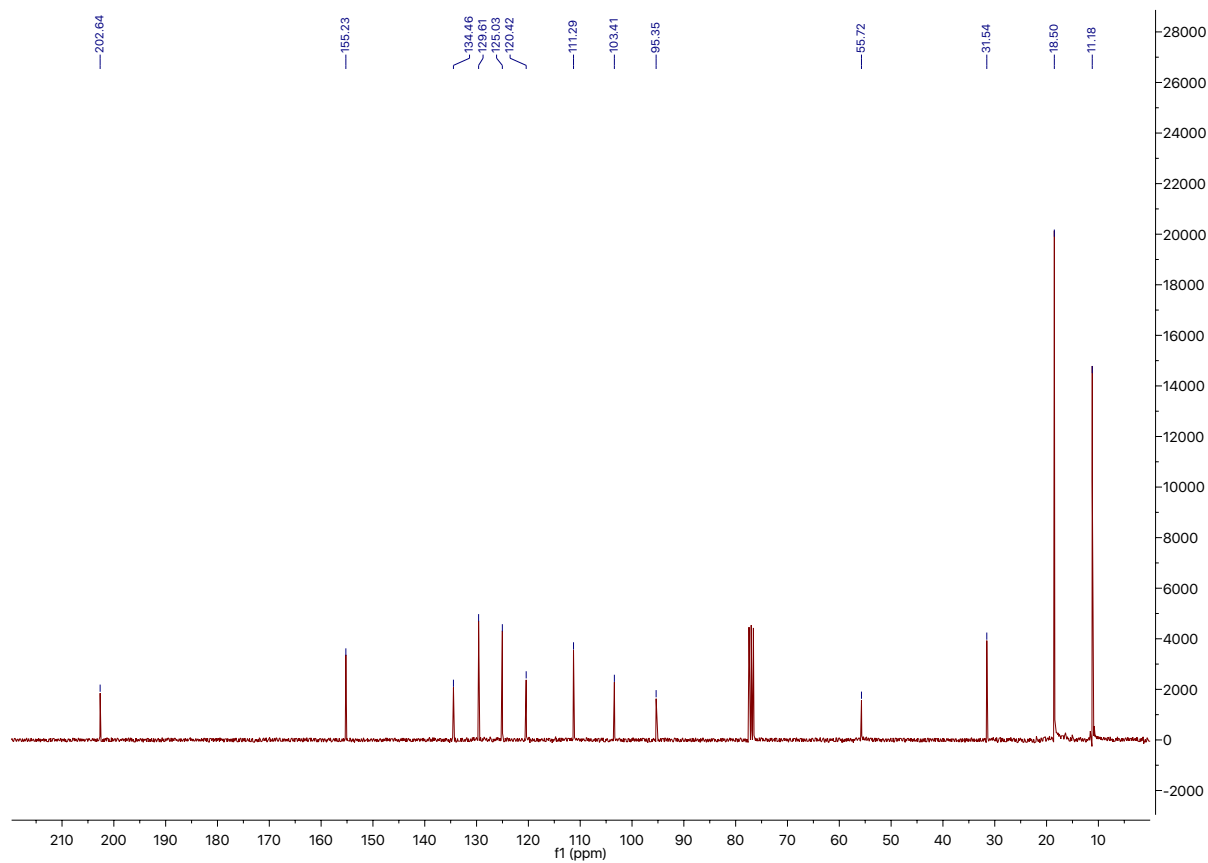

**1-(2-(Trifluoromethyl)-6-((triisopropylsilyl)ethynyl)phenyl)ethan-1-one (7i)**

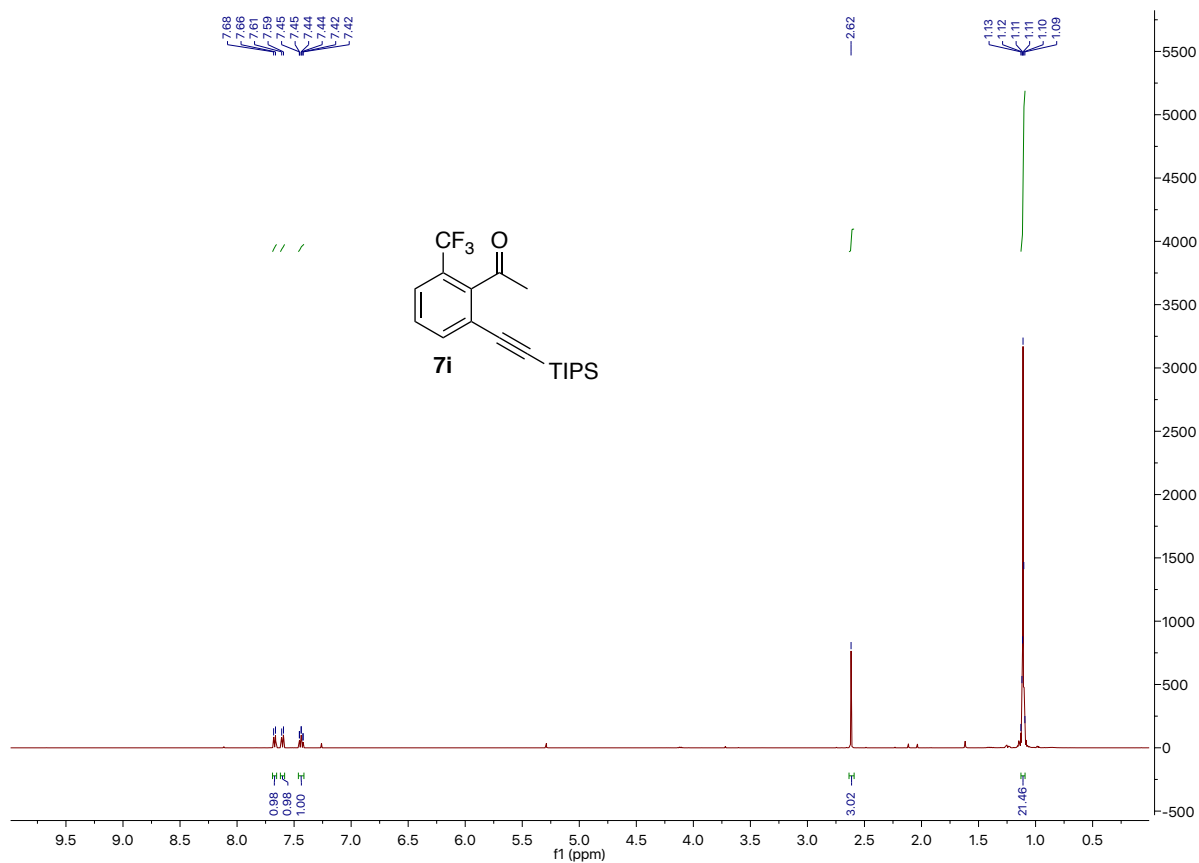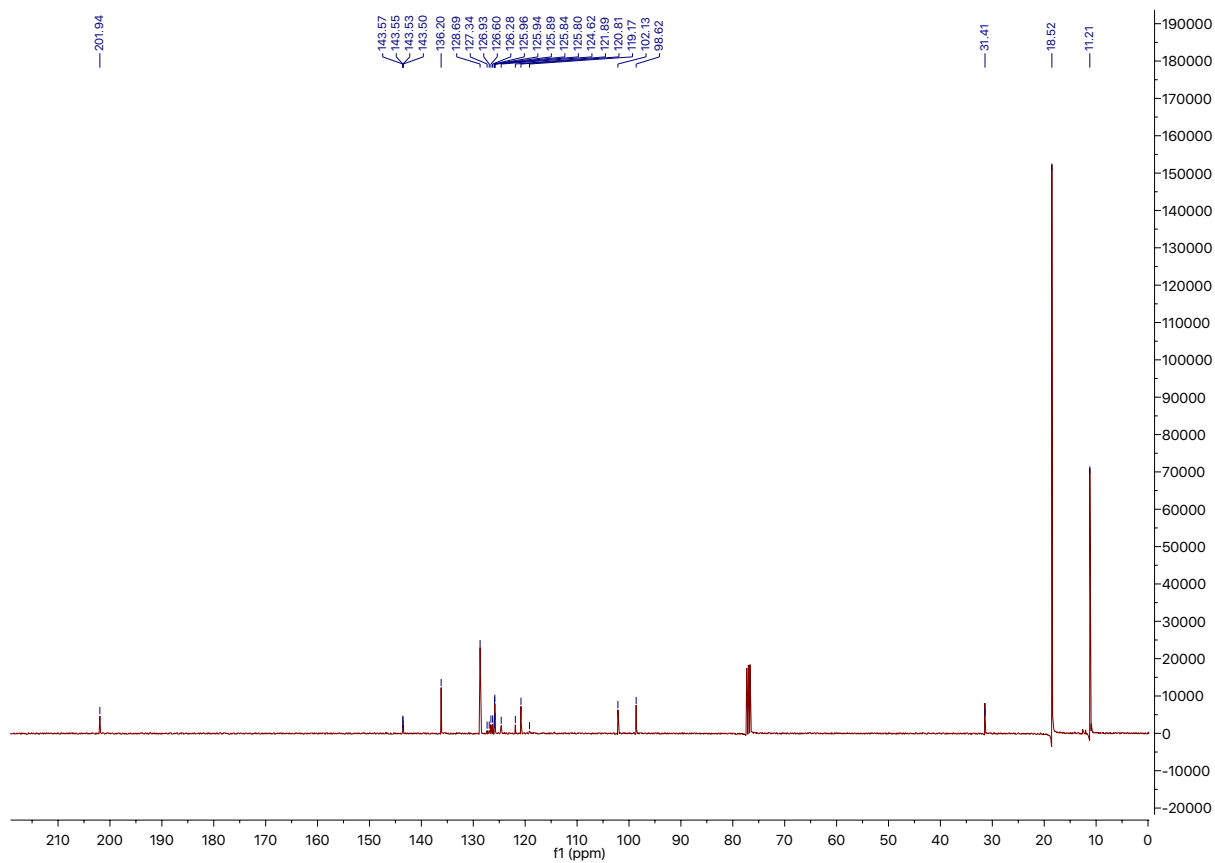

**1-(2,4-Difluoro-6-((triisopropylsilyl)ethynyl)phenyl)ethan-1-one (7j)**

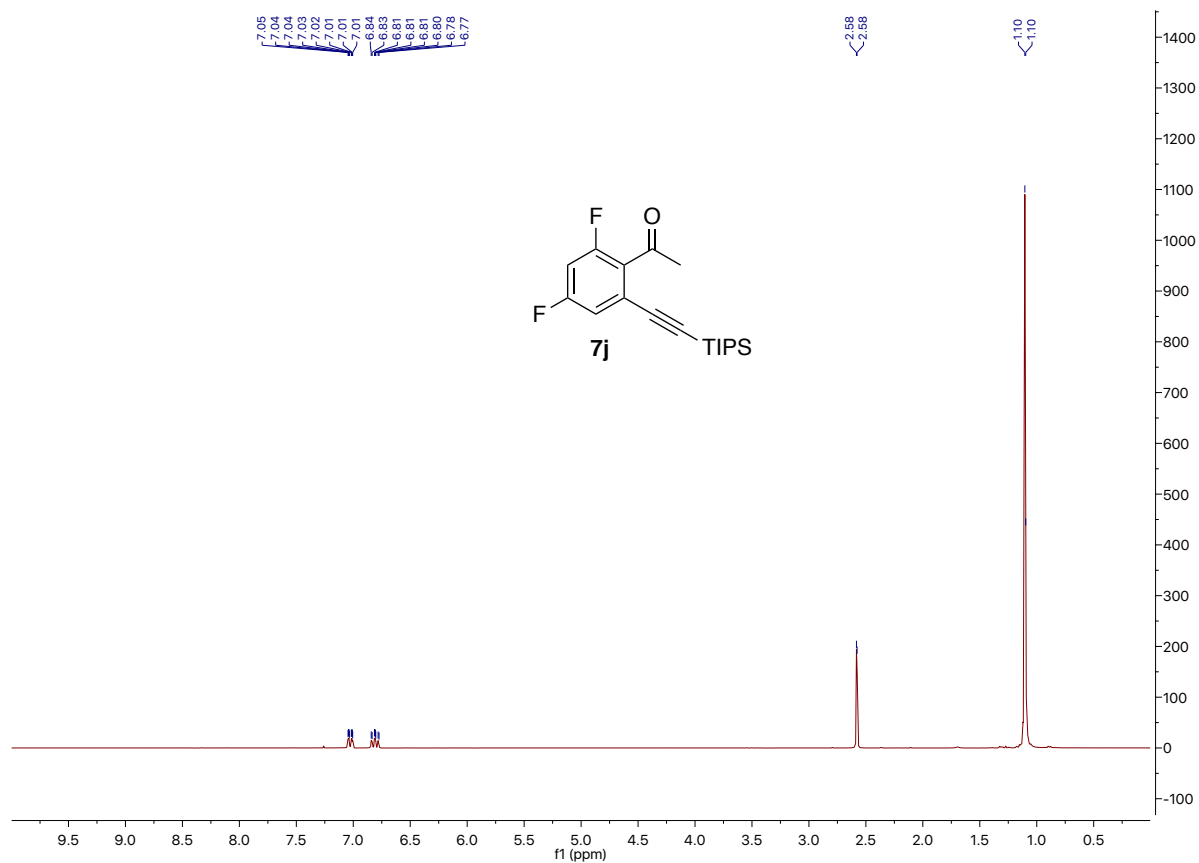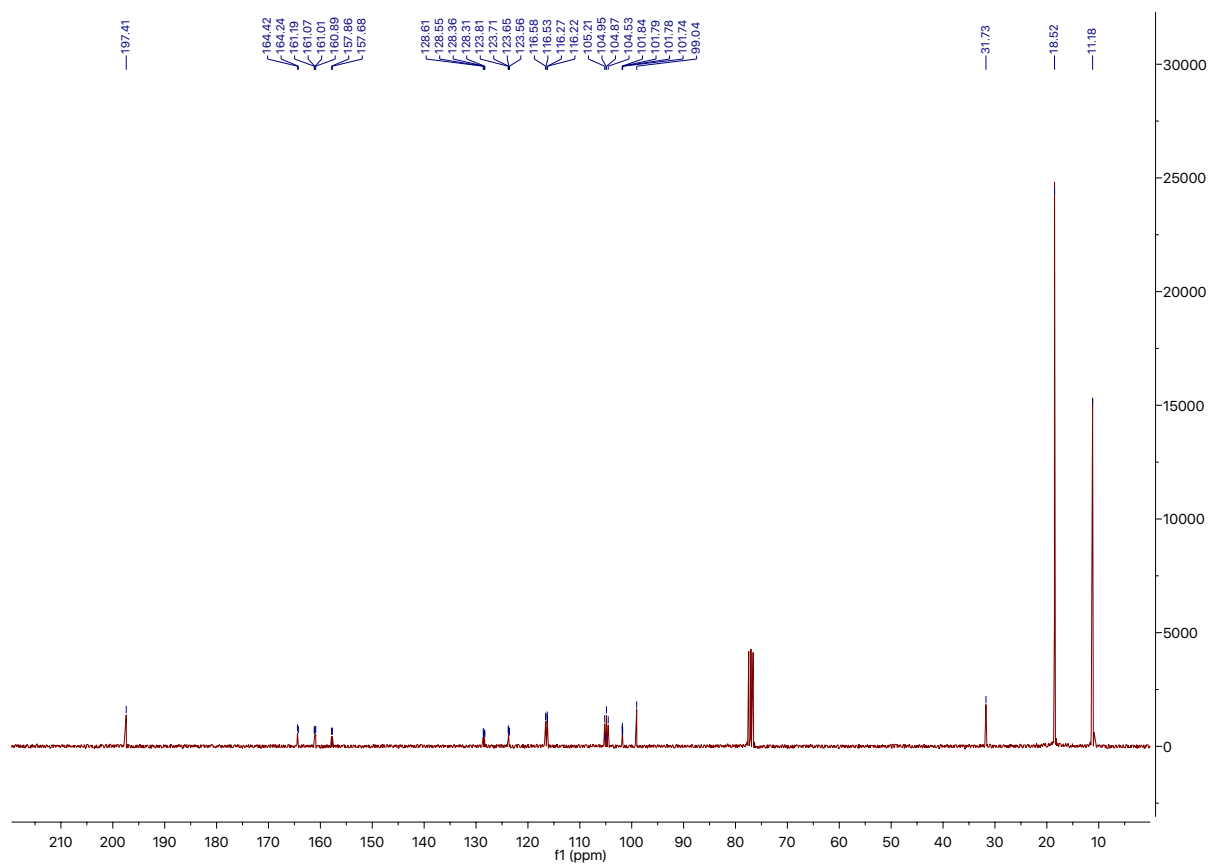

1-(2,6-Bis((triisopropylsilyl)ethynyl)phenyl)ethan-1-one (7k)

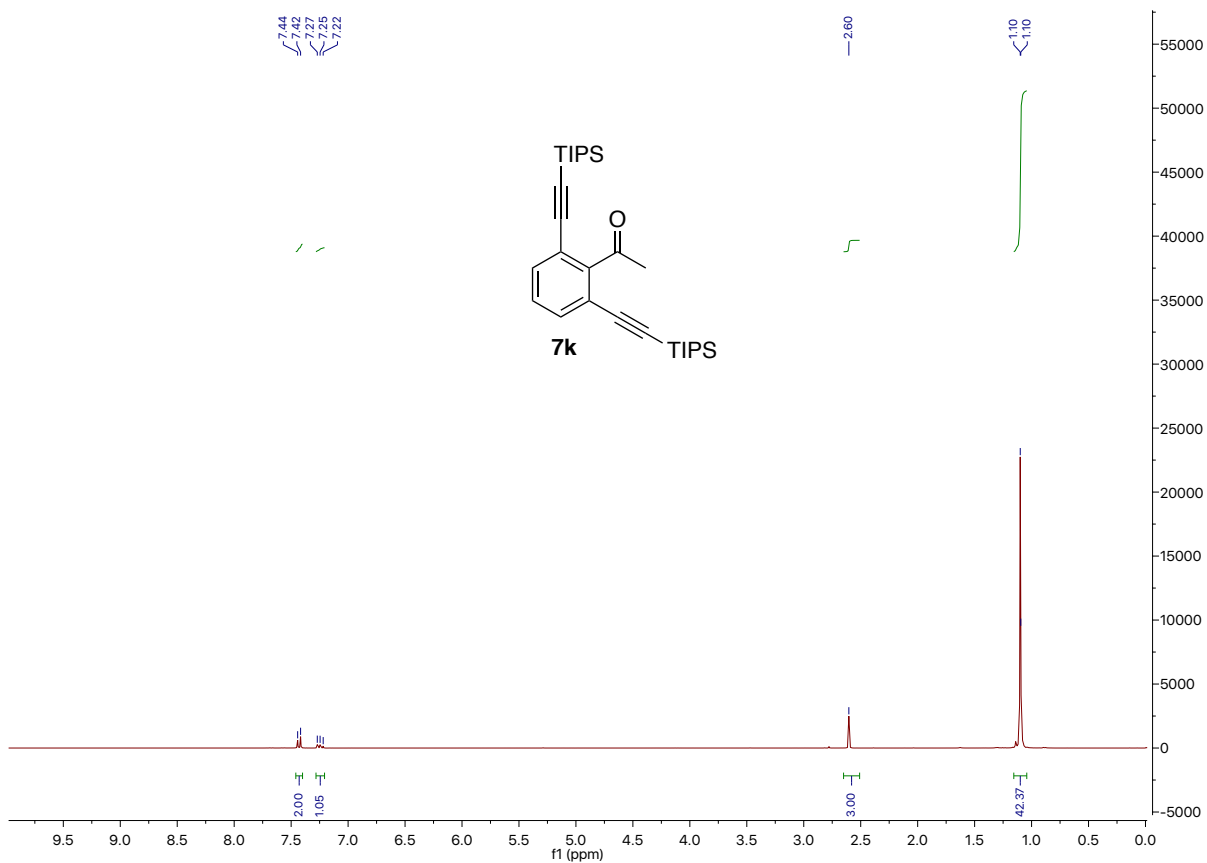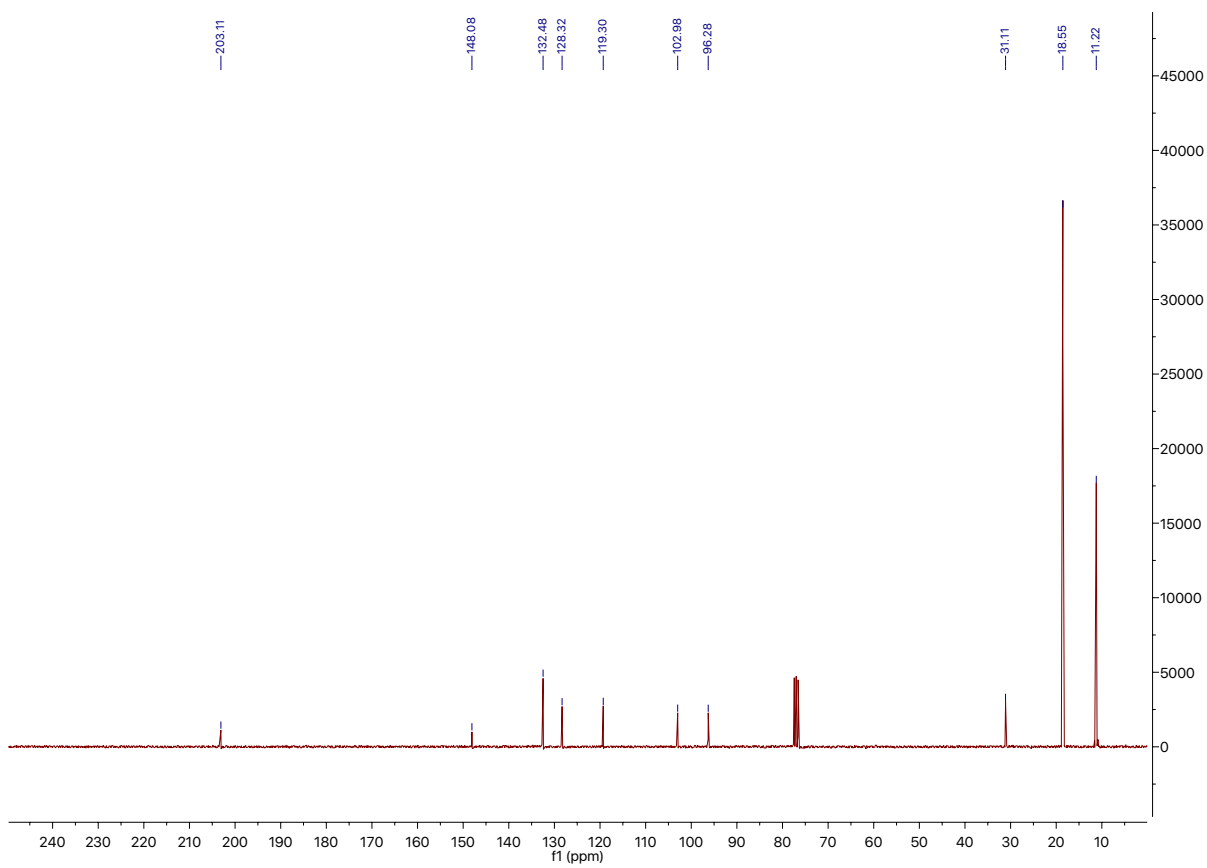

**Ethyl 4-acetyl-3,5-bis((triisopropylsilyl)ethynyl)benzoate (71)**

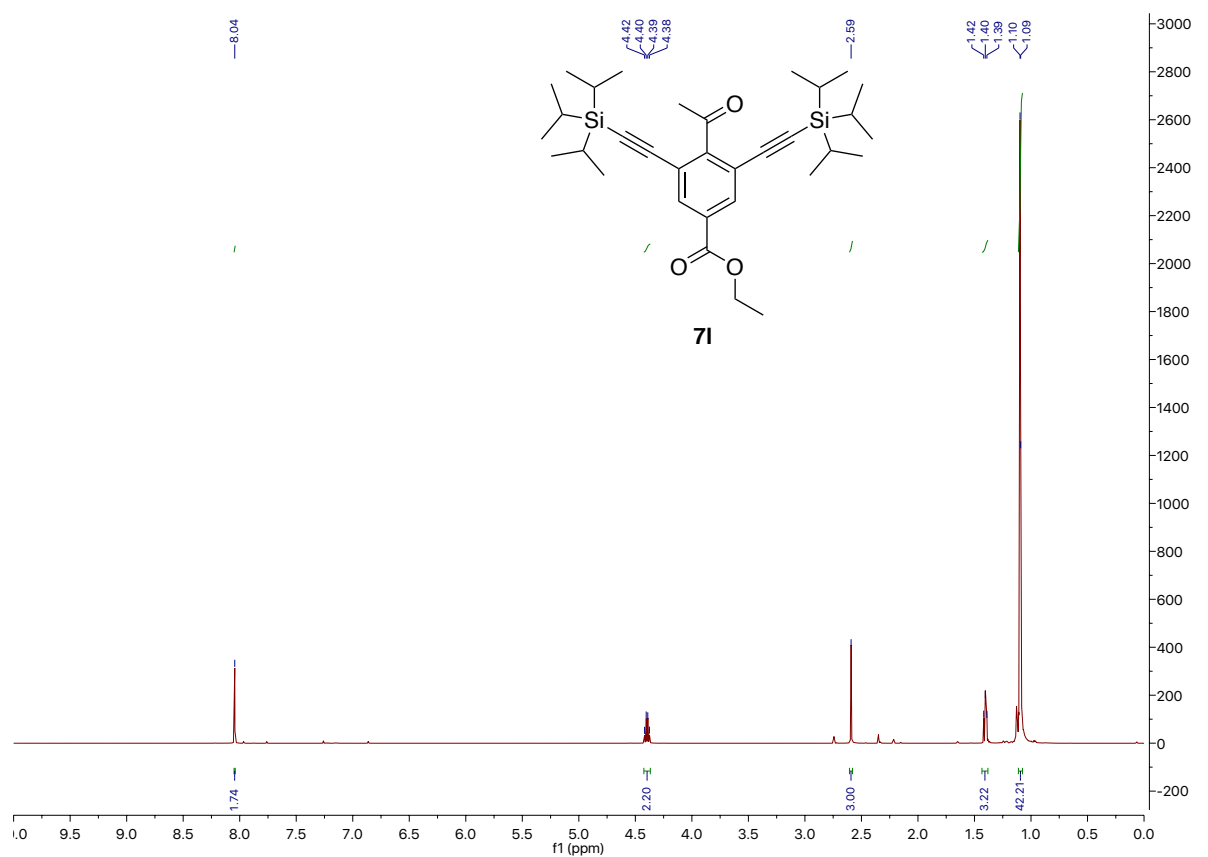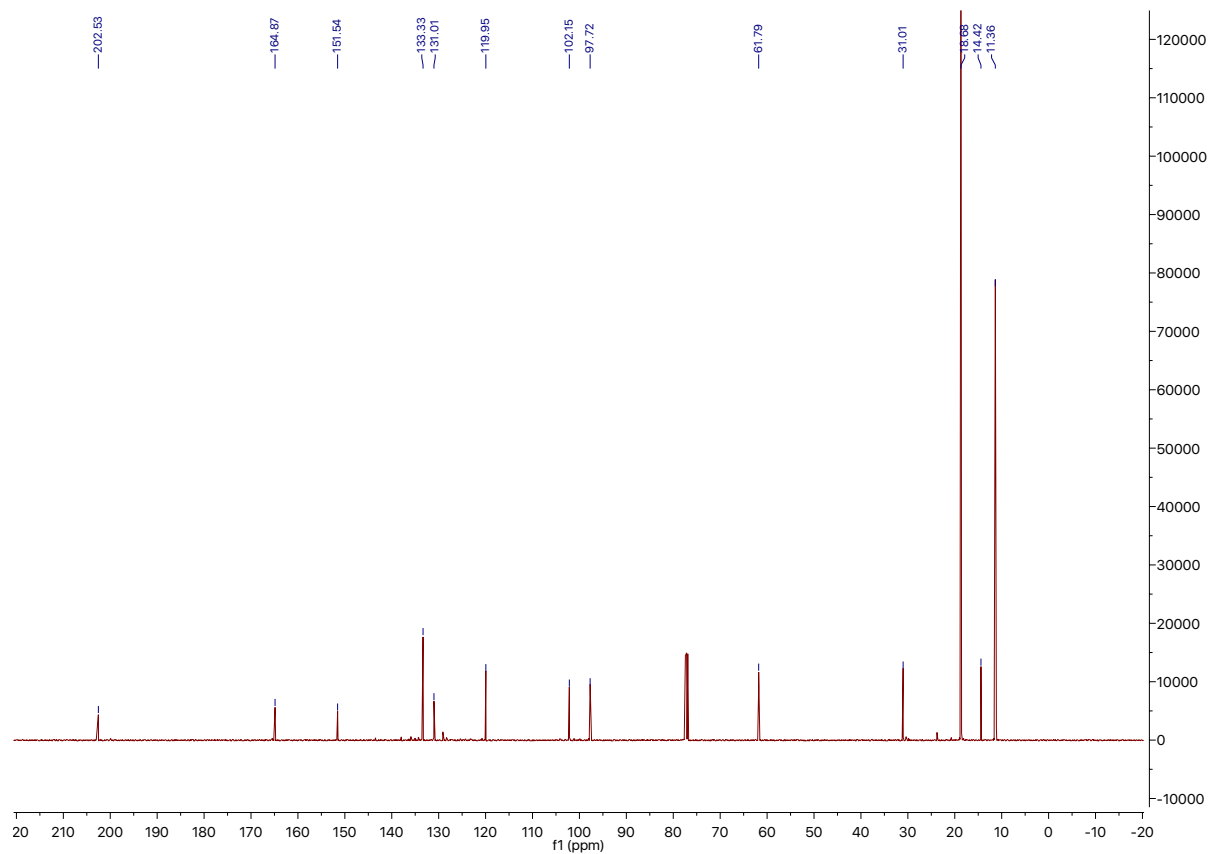



**1-(2-((Triisopropylsilyl)ethynyl)naphthalen-1-yl)ethan-1-one (7m)**

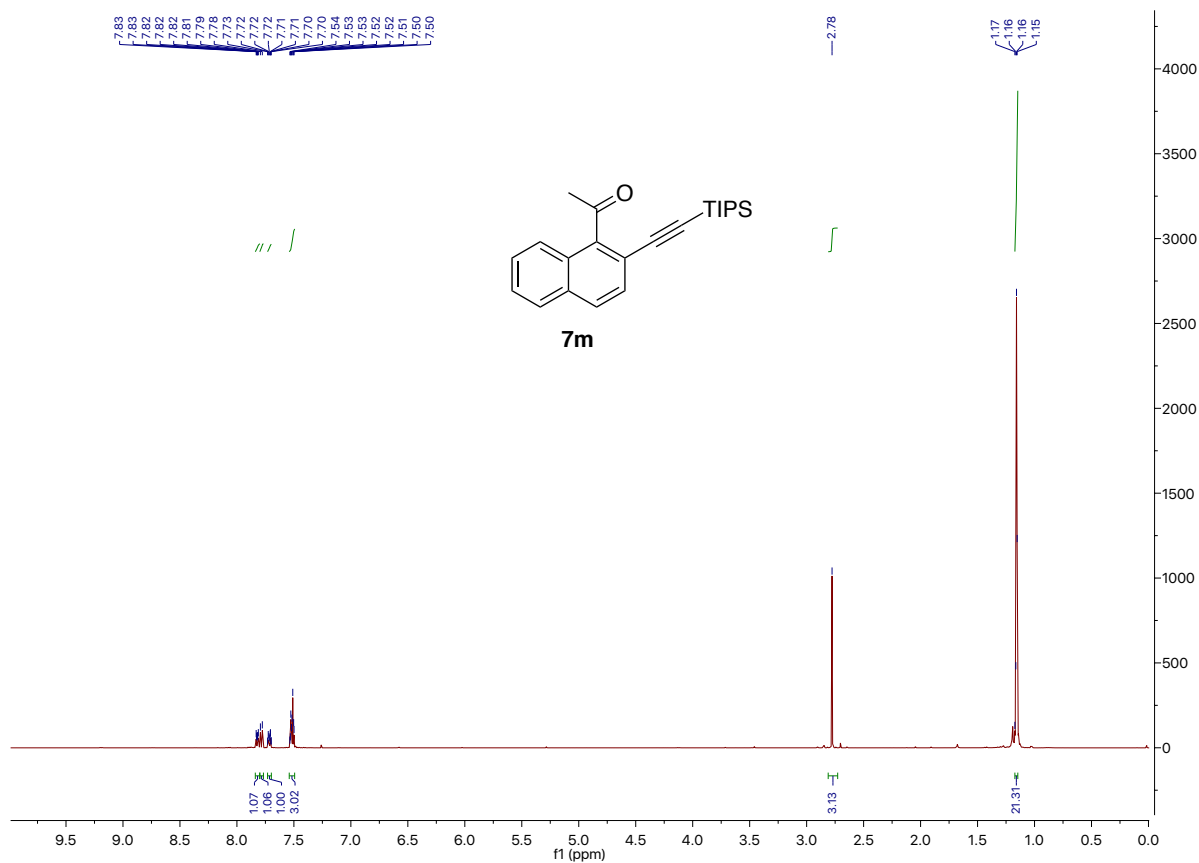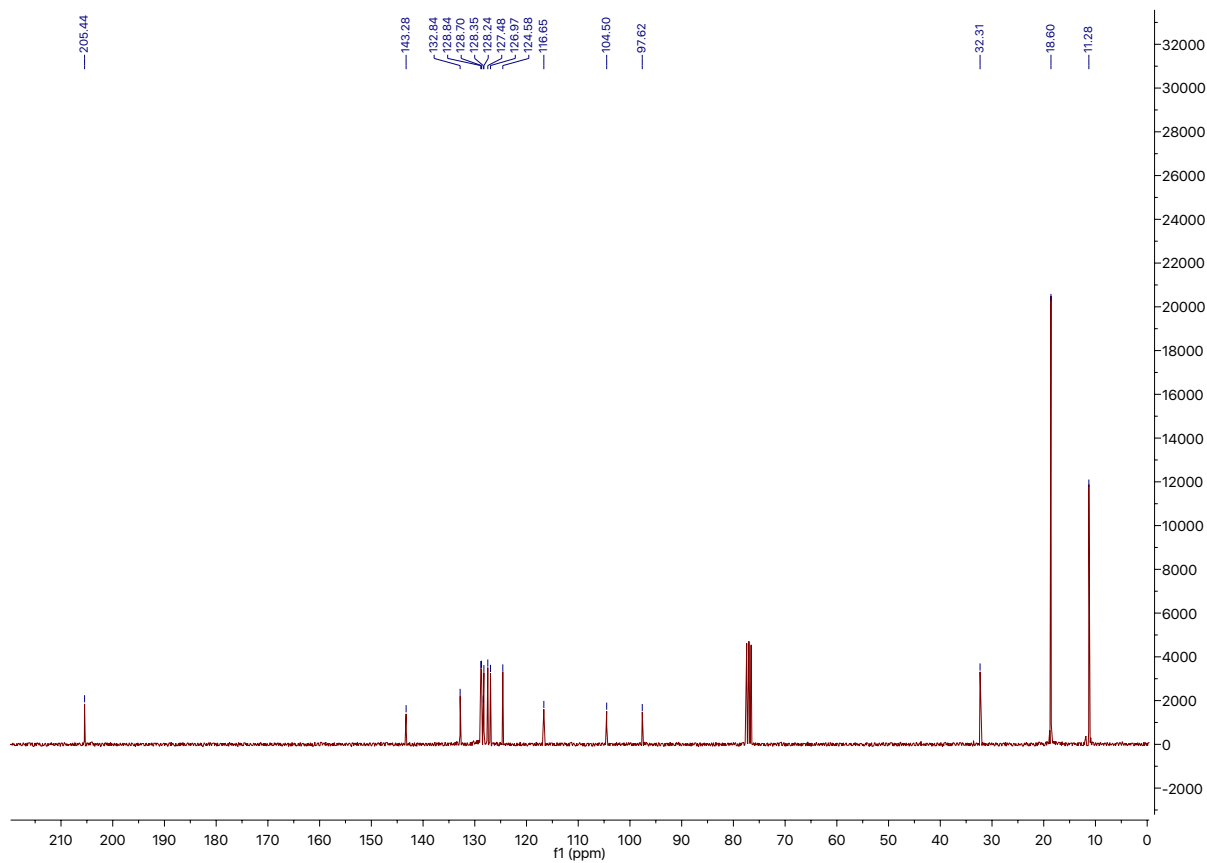

**1-(1-Methyl-3-((triisopropylsilyl)ethynyl)-1H-pyrrol-2-yl)ethan-1-one (7n)**

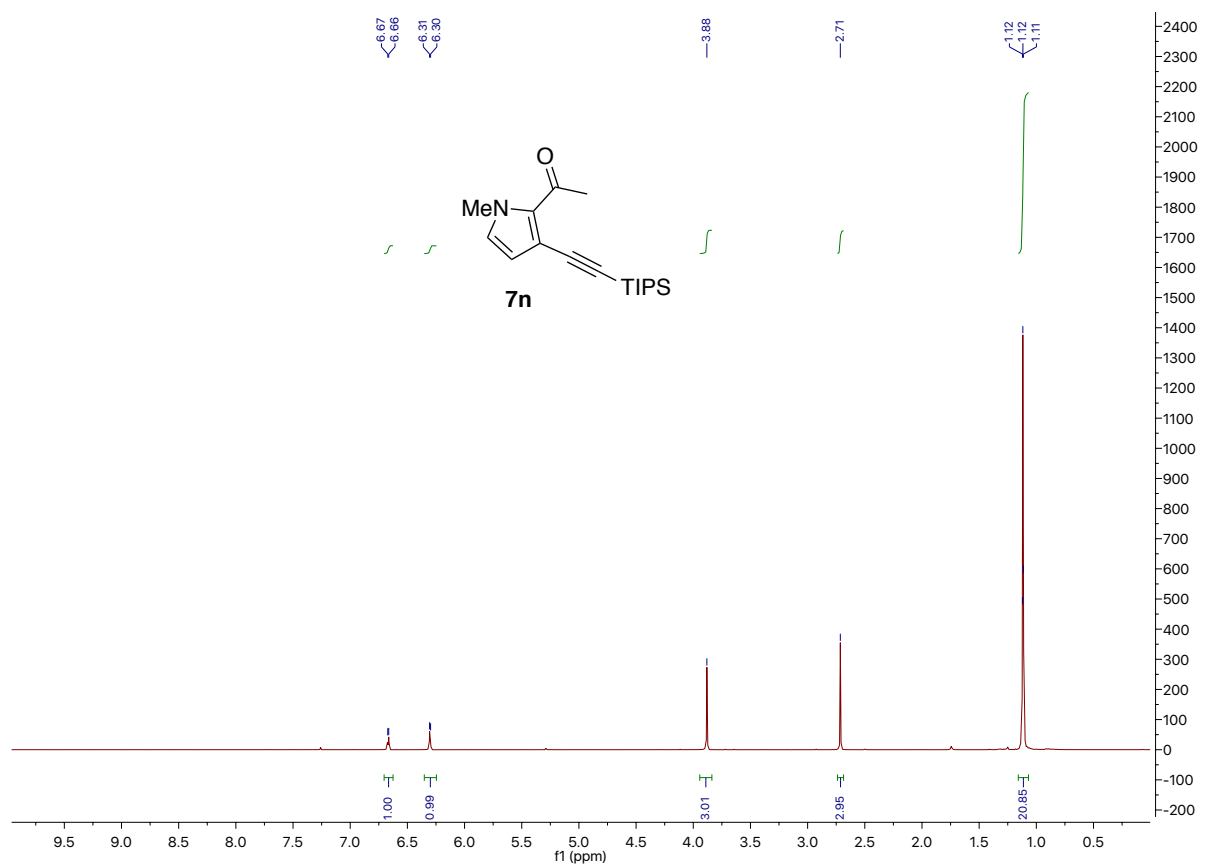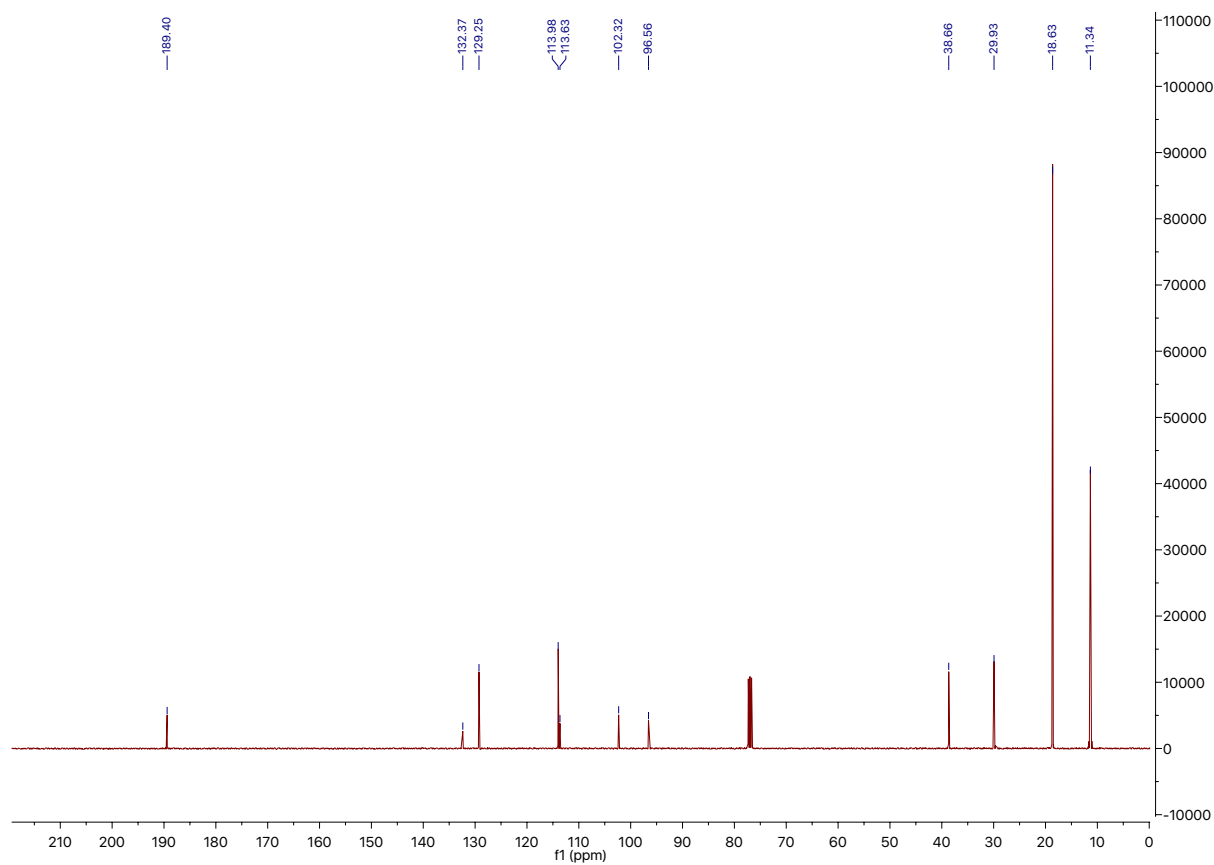

**1-(3-((Triisopropylsilyl)ethynyl)furan-2-yl)ethan-1-one (7o)**

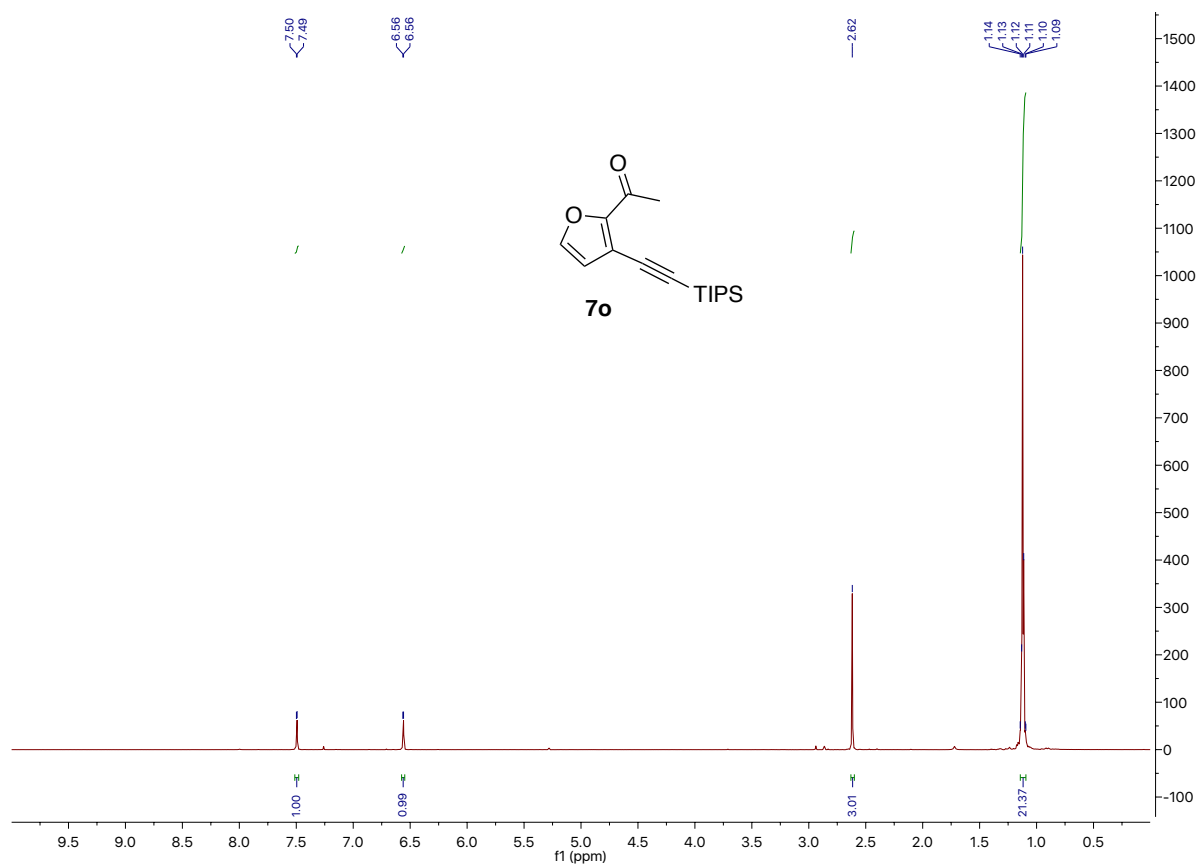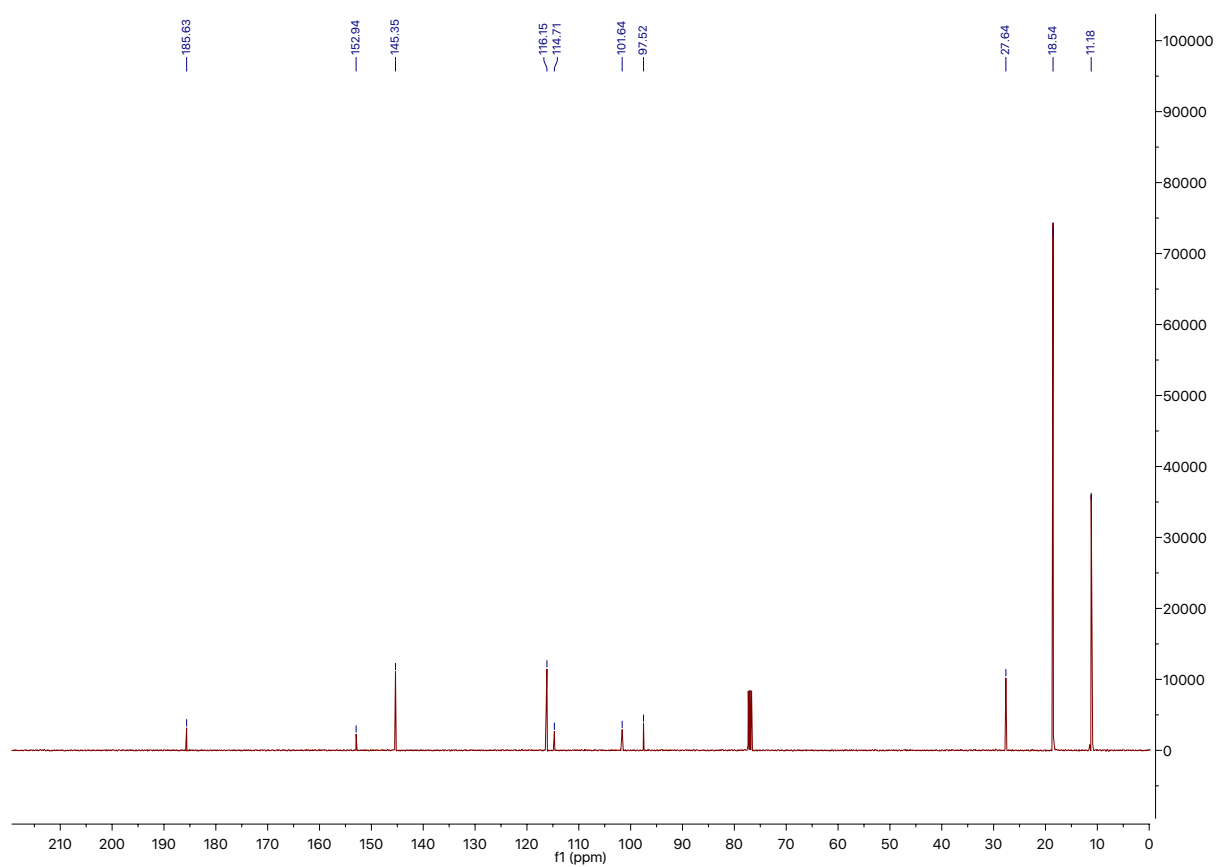

**1-(3-((Triisopropylsilyl)ethynyl)thiophen-2-yl)ethan-1-one (7p)**

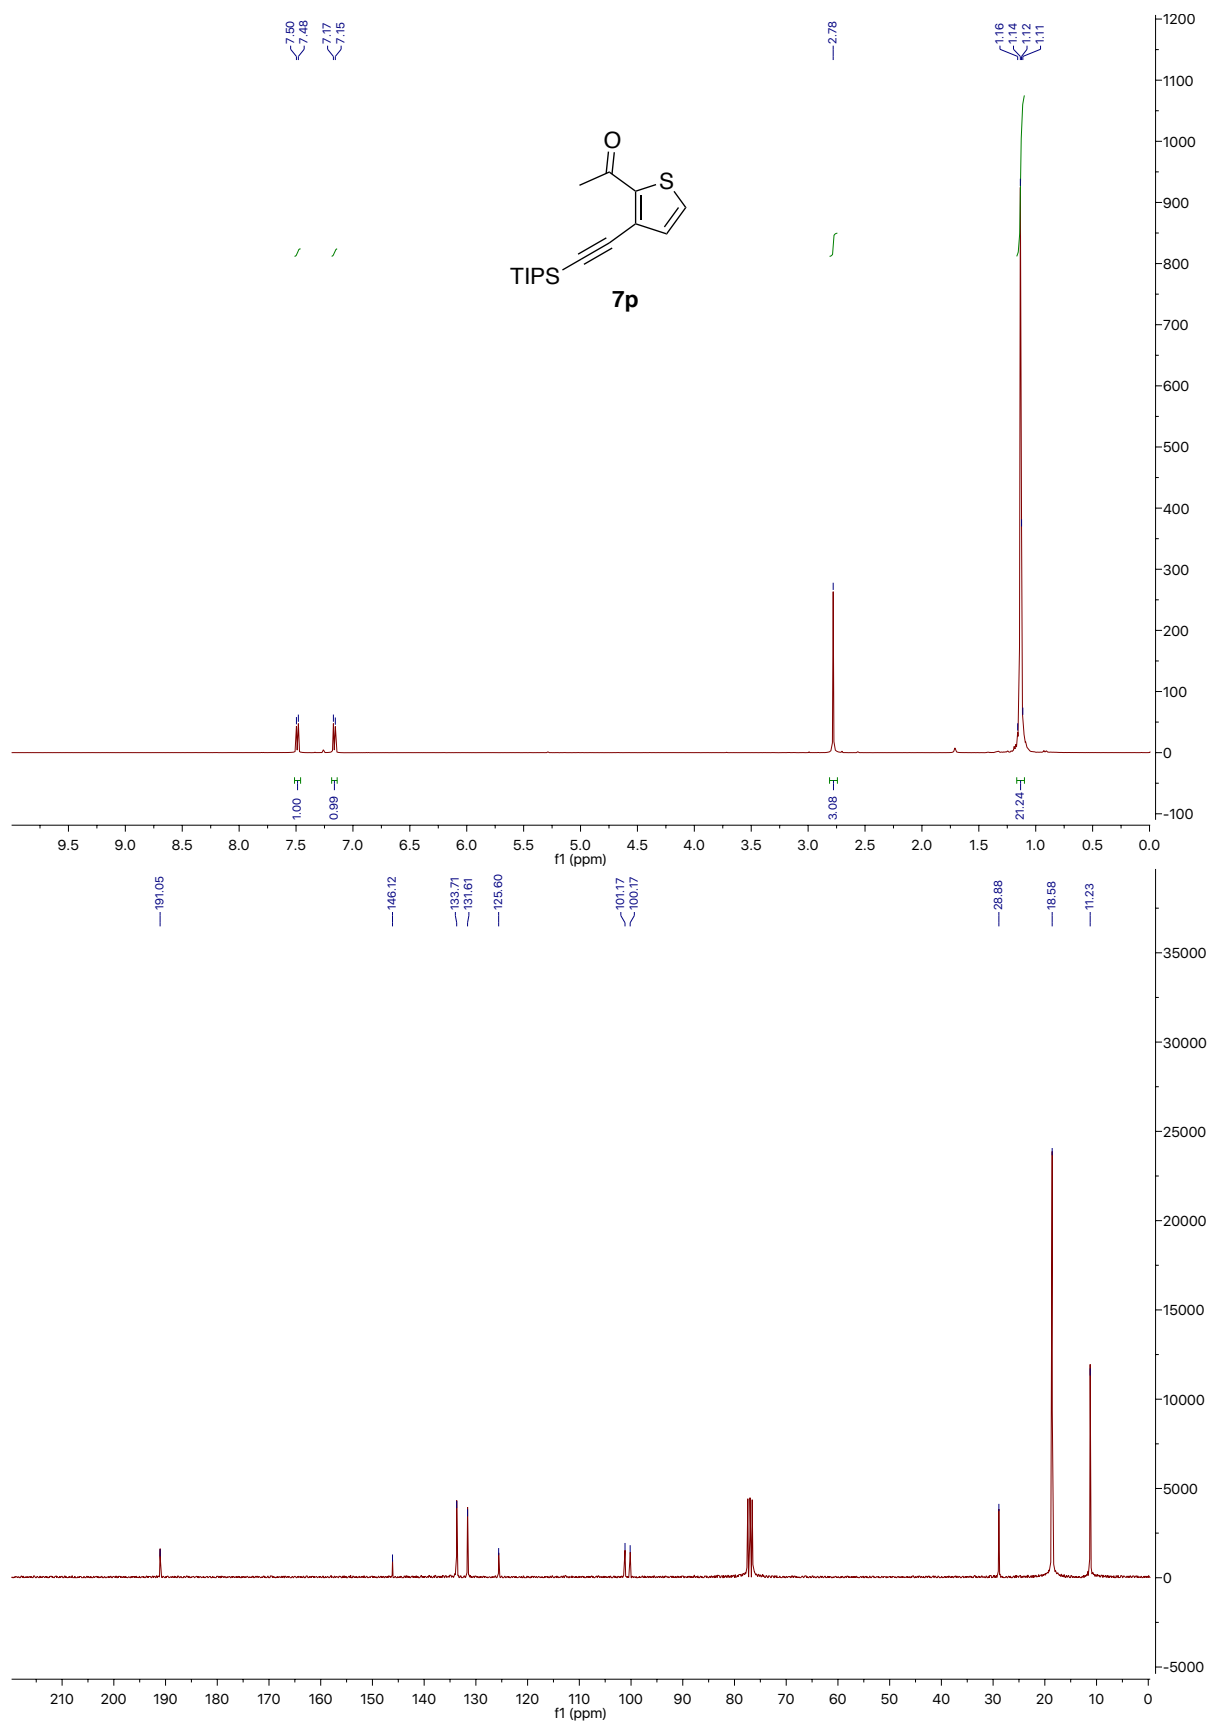

**1,5-Dichloro-4,8-bis((triisopropylsilyl)ethynyl)anthracene-9,10-dione (7q)**

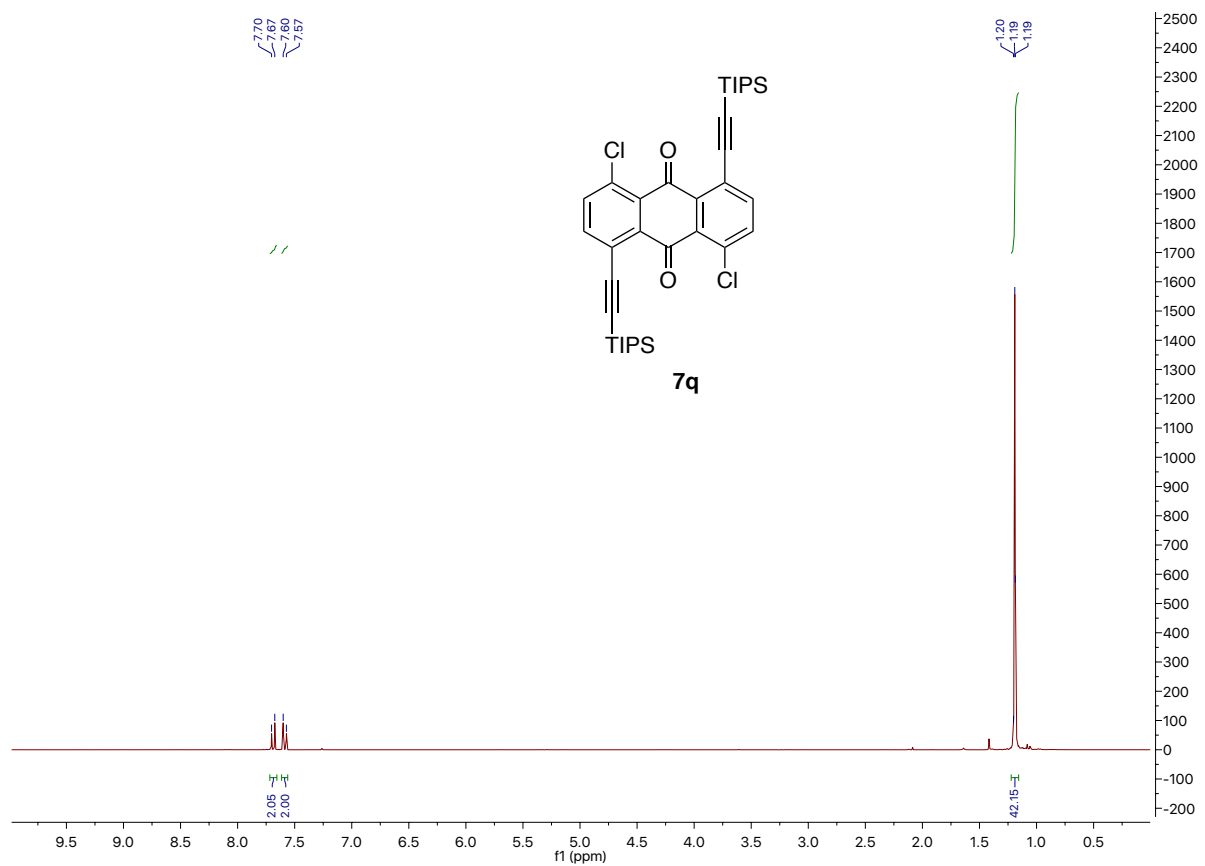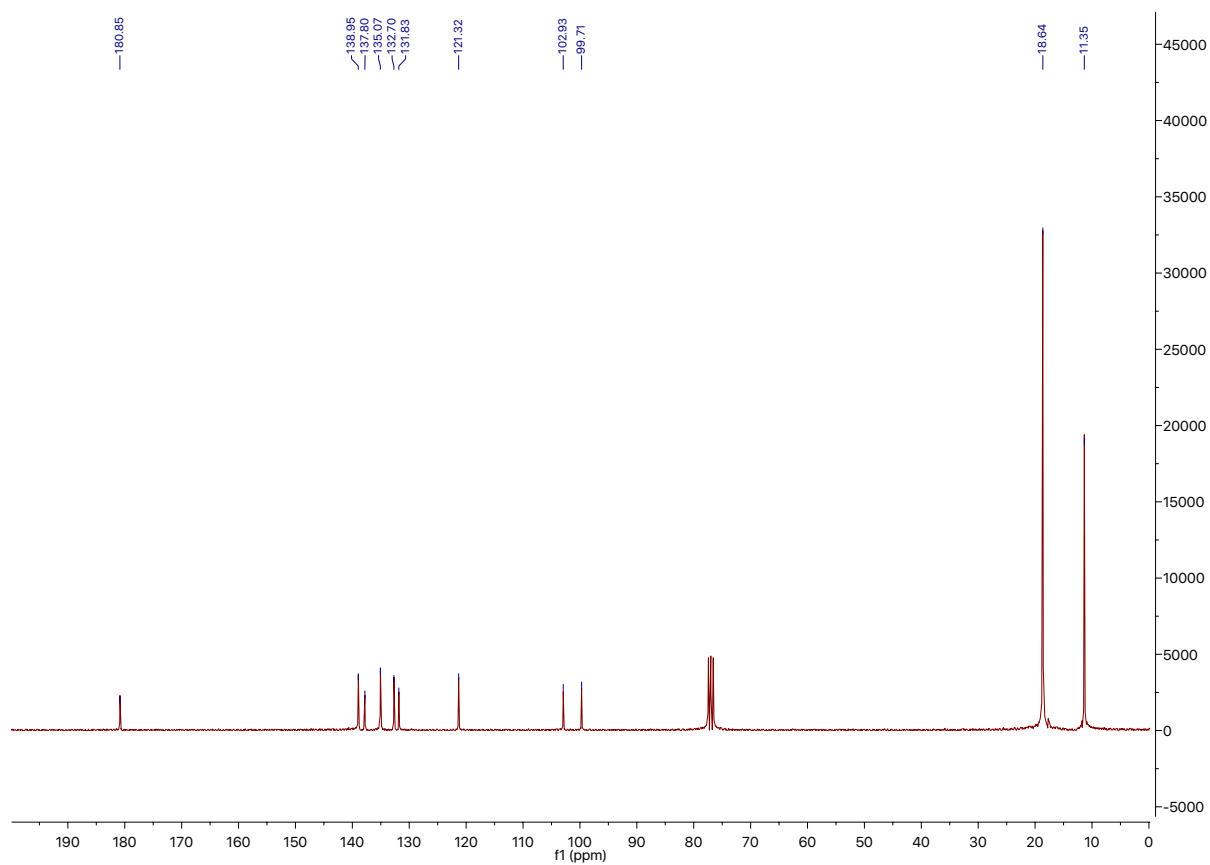

**Isopropyl 2-(4-(4-chloro-2-((triisopropylsilyl)ethynyl)benzoyl)-3-((triisopropylsilyl)ethynyl)phenoxy)-2-methylpropanoate (7r)**

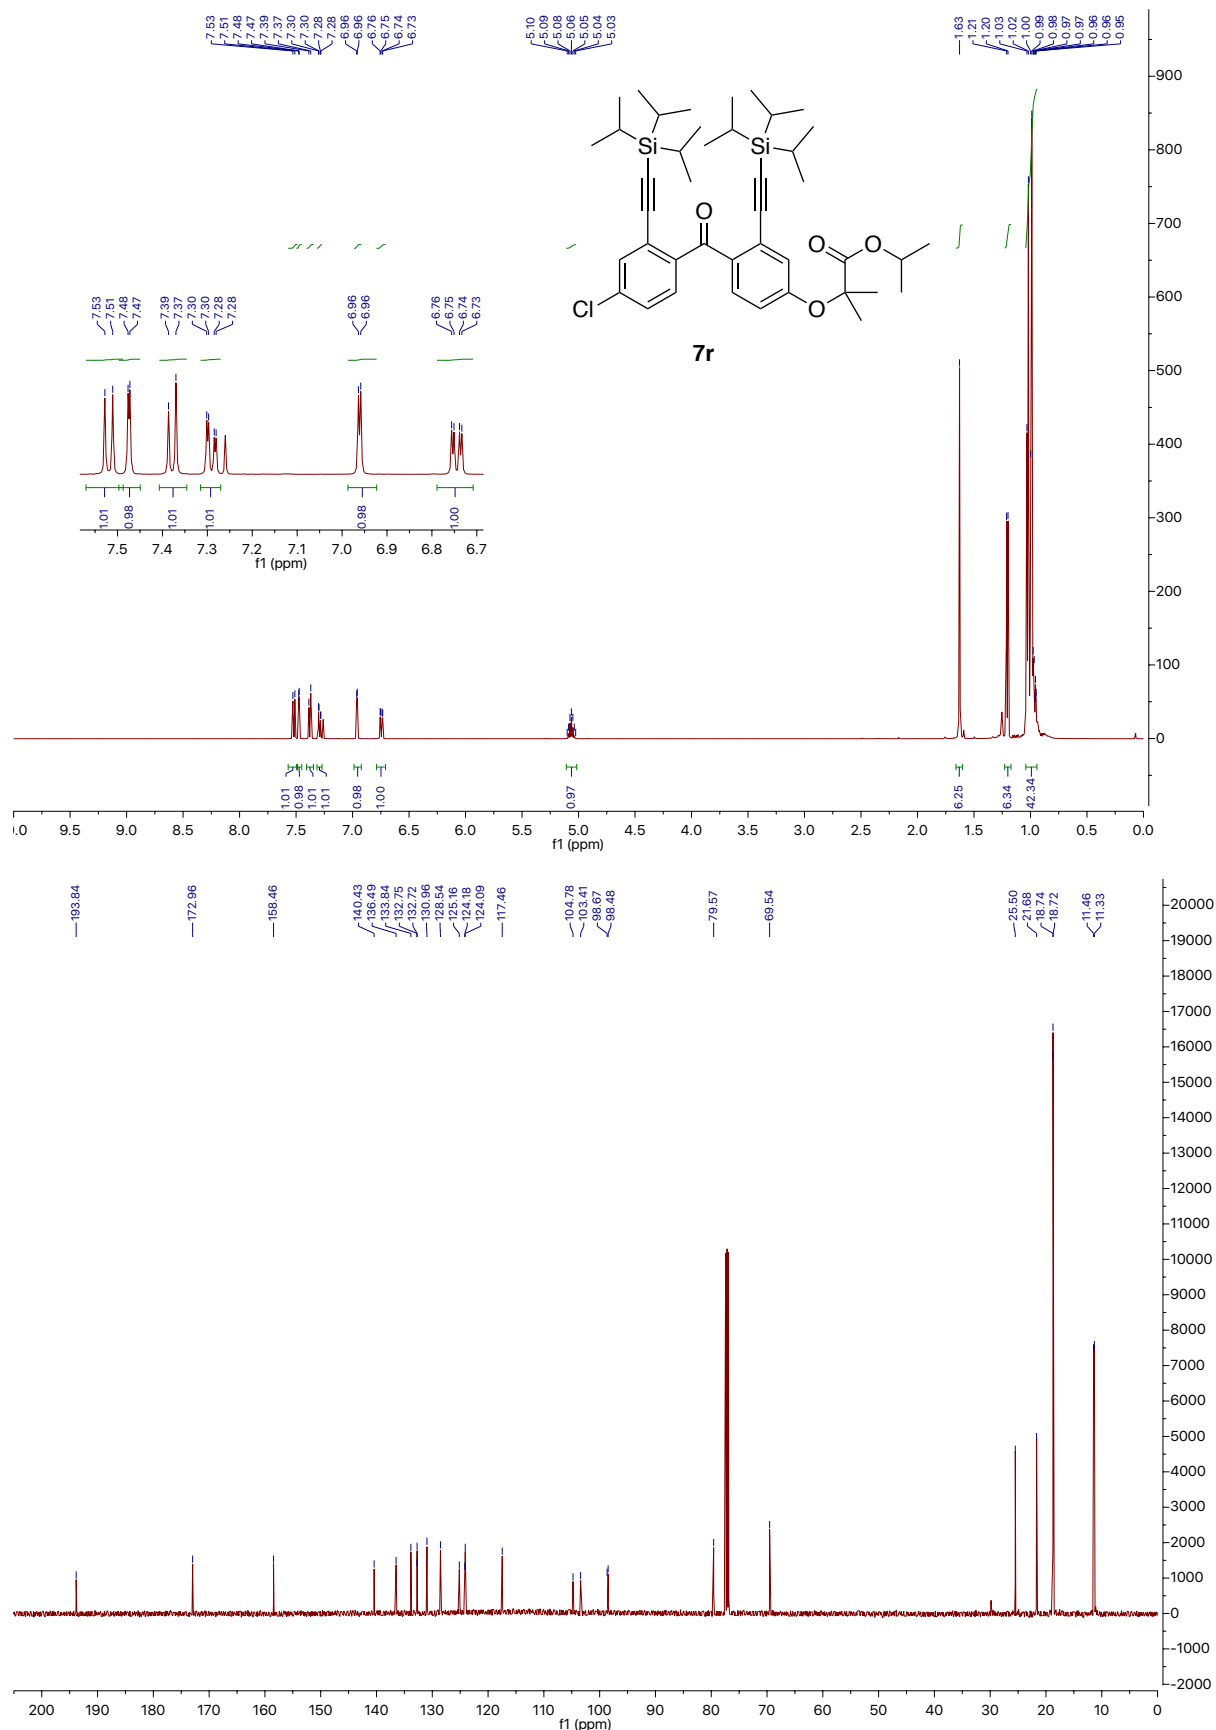

*Ethyl (Z)-3-cyclopropyl-5-(triisopropylsilyl)pent-2-en-4-ynoate (9a)*

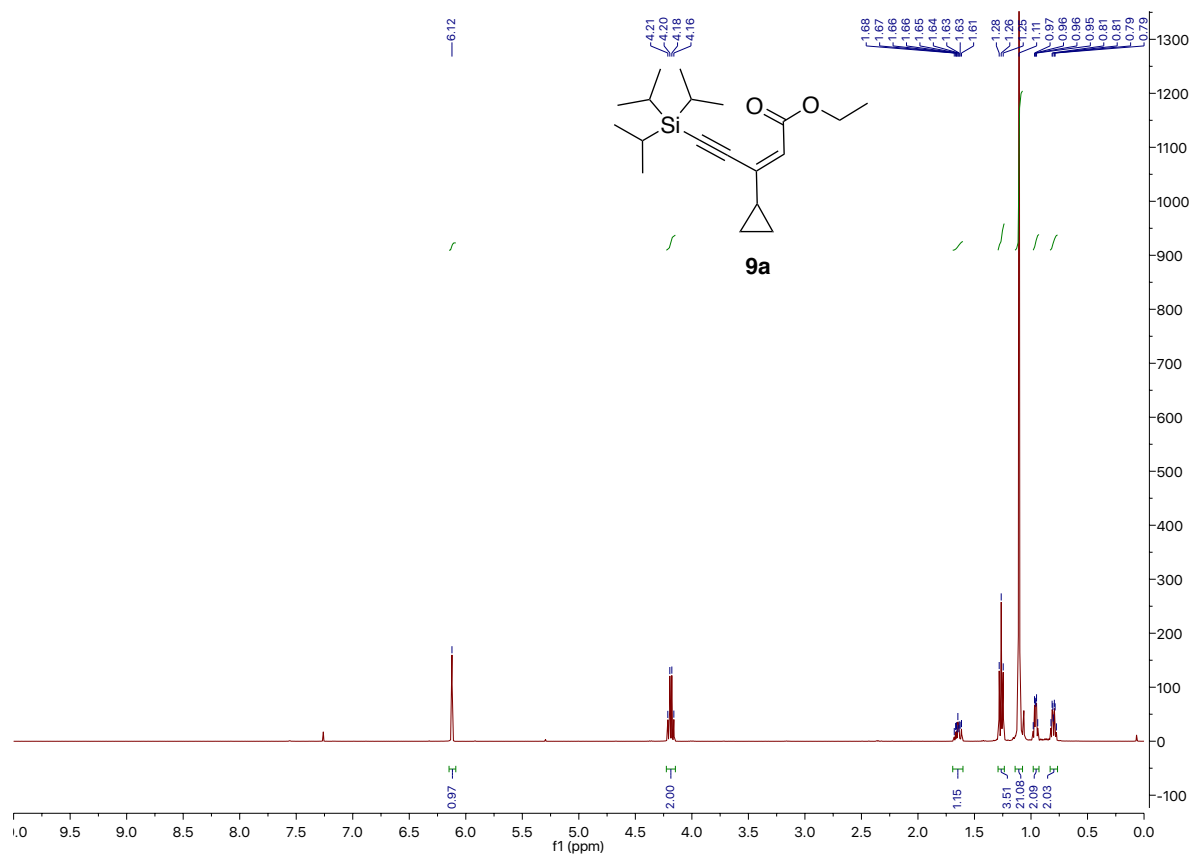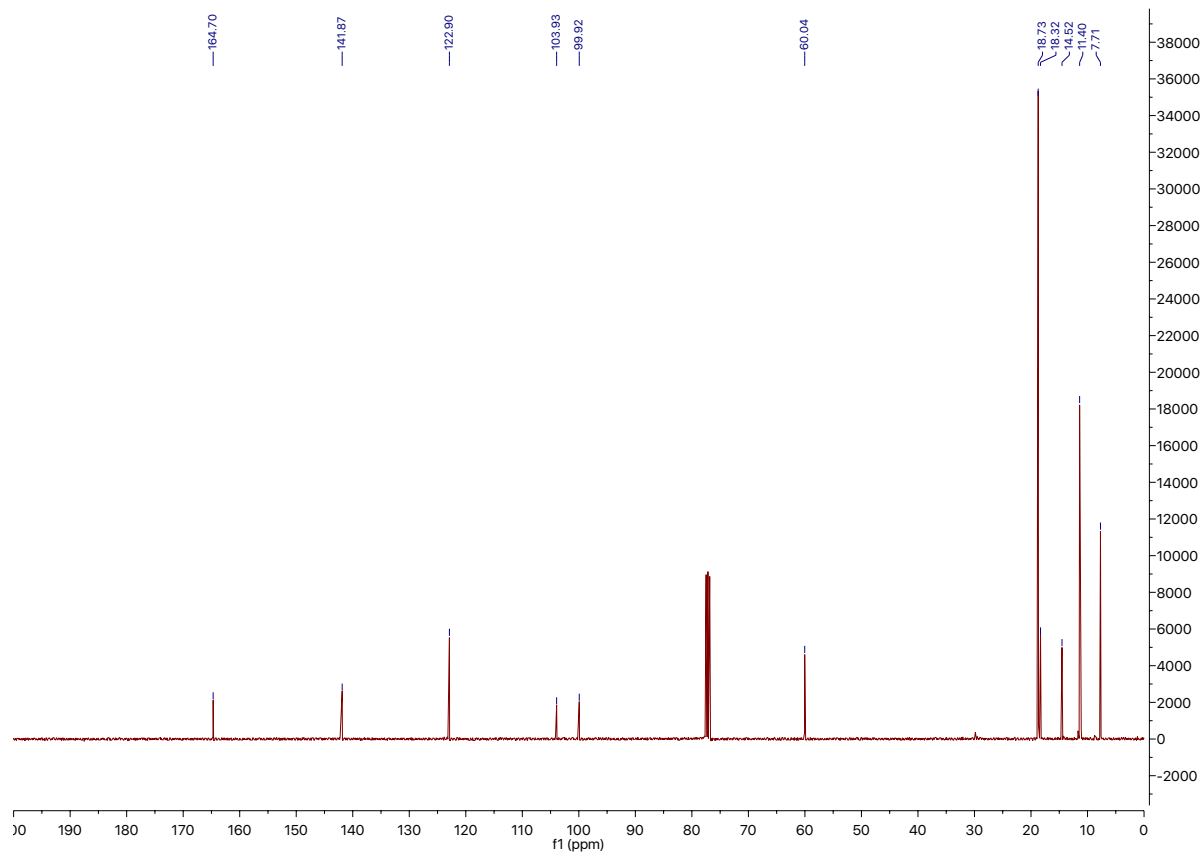

**Ethyl (Z)-3-phenyl-5-(triisopropylsilyl)pent-2-en-4-ynoate (9b)**

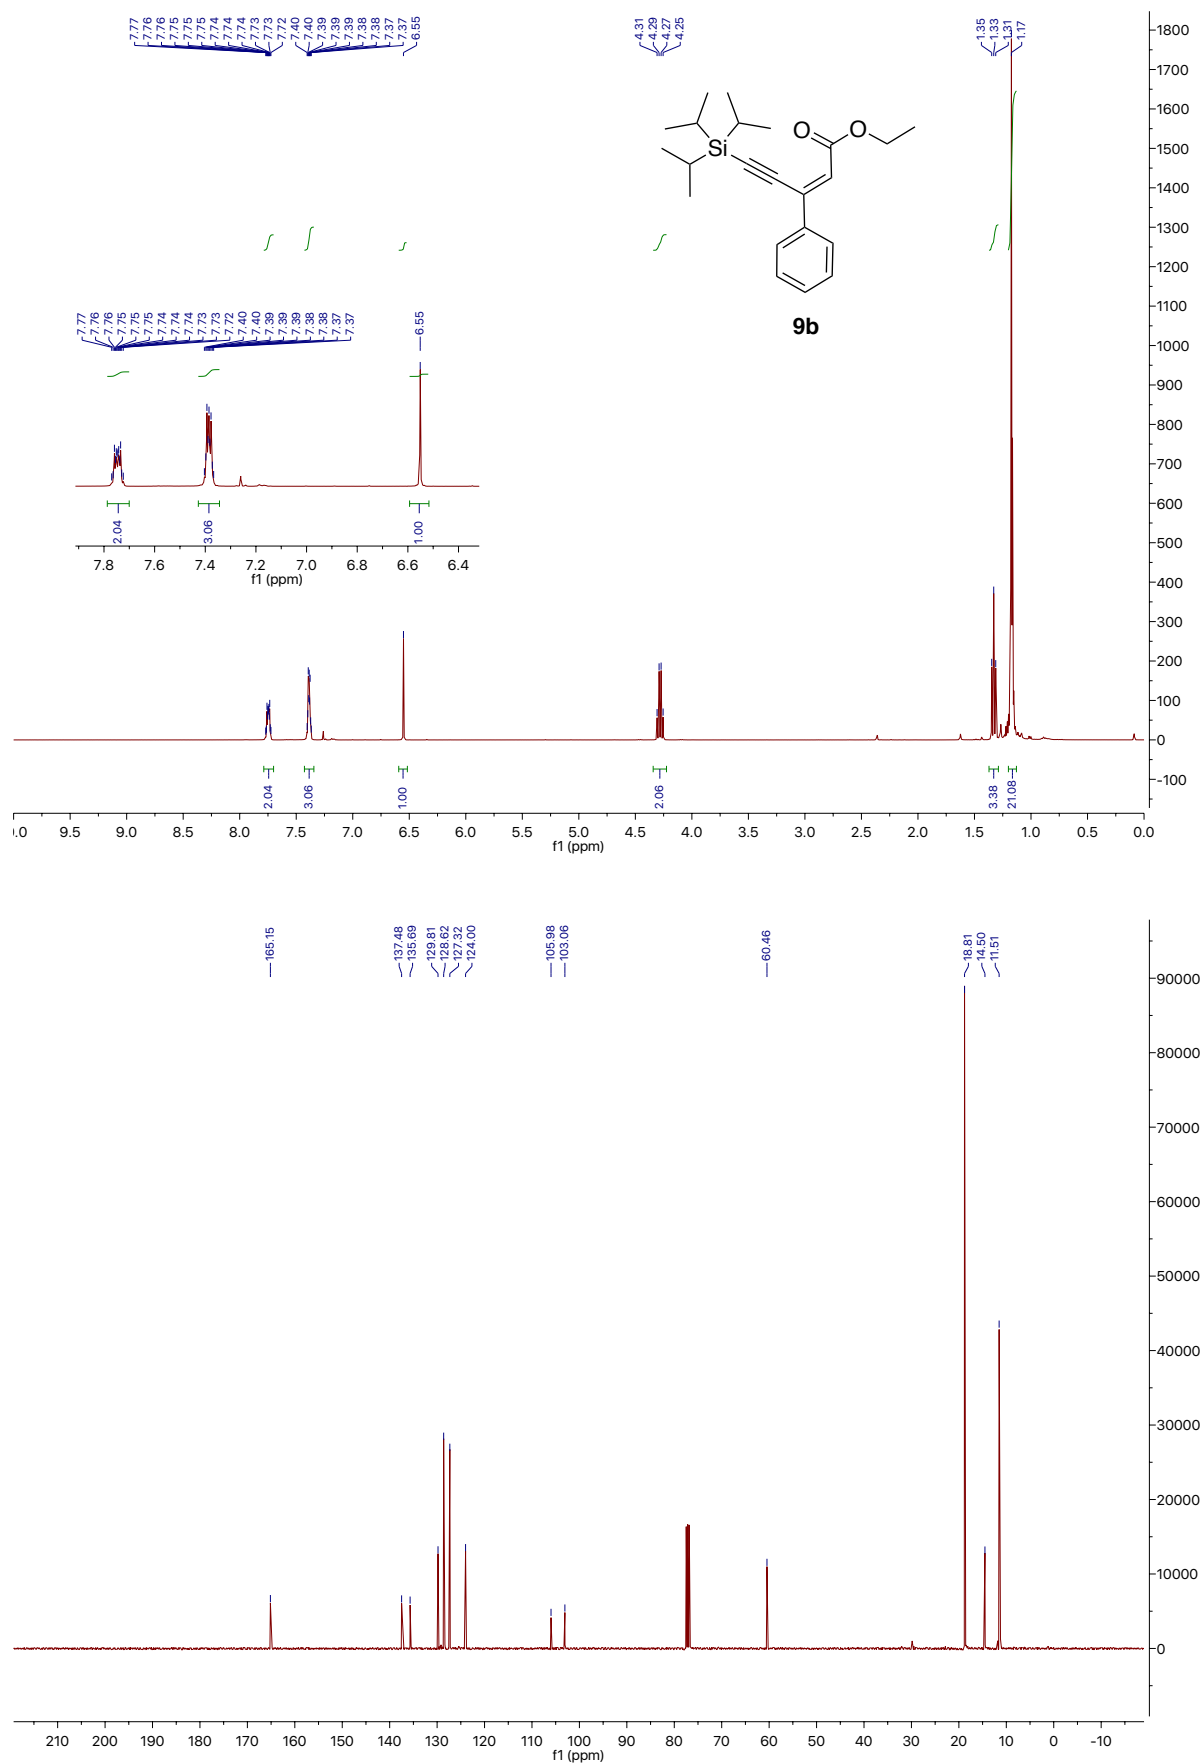



**Ethyl (Z)-3-(4-ethoxyphenyl)-5-(triisopropylsilyl)pent-2-en-4-ynoate (9c)**

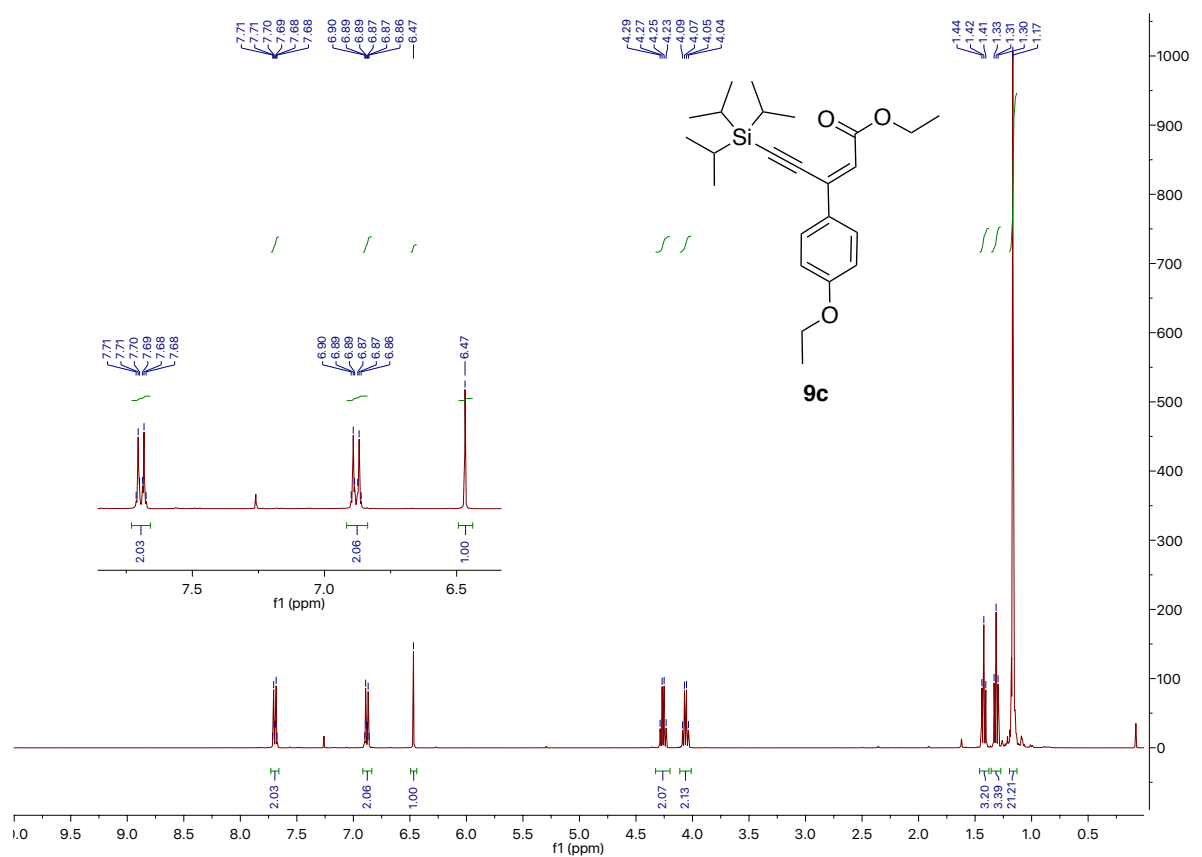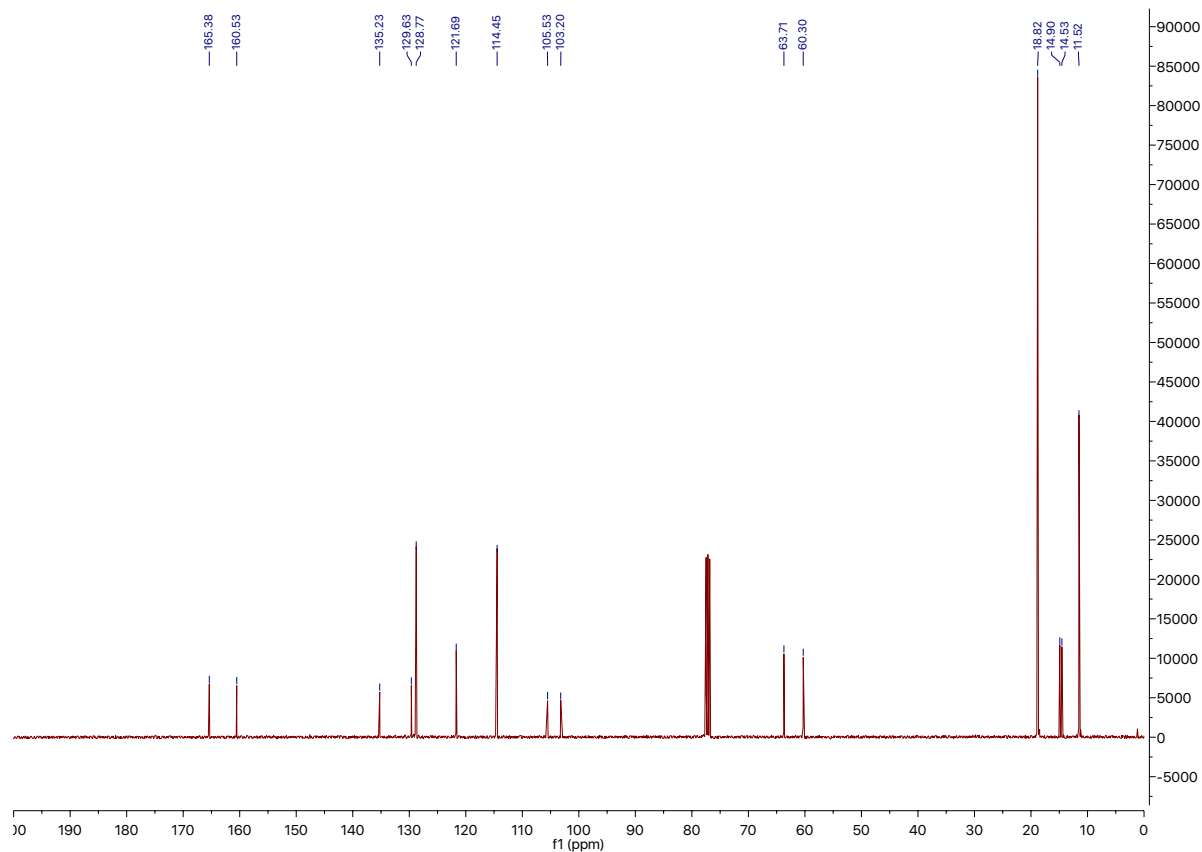

**Ethyl (Z)-3-(4-bromophenyl)-5-(triisopropylsilyl)pent-2-en-4-ynoate (9d)**

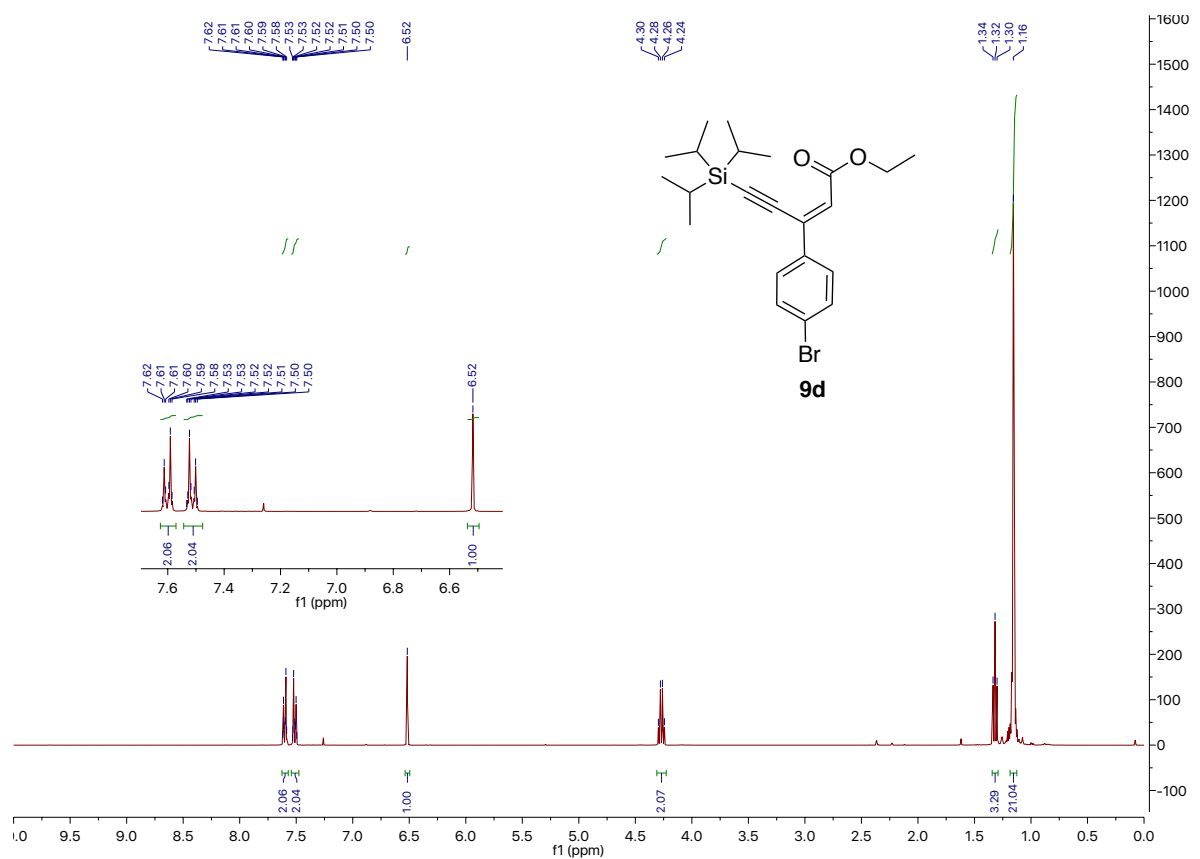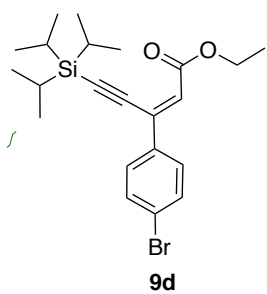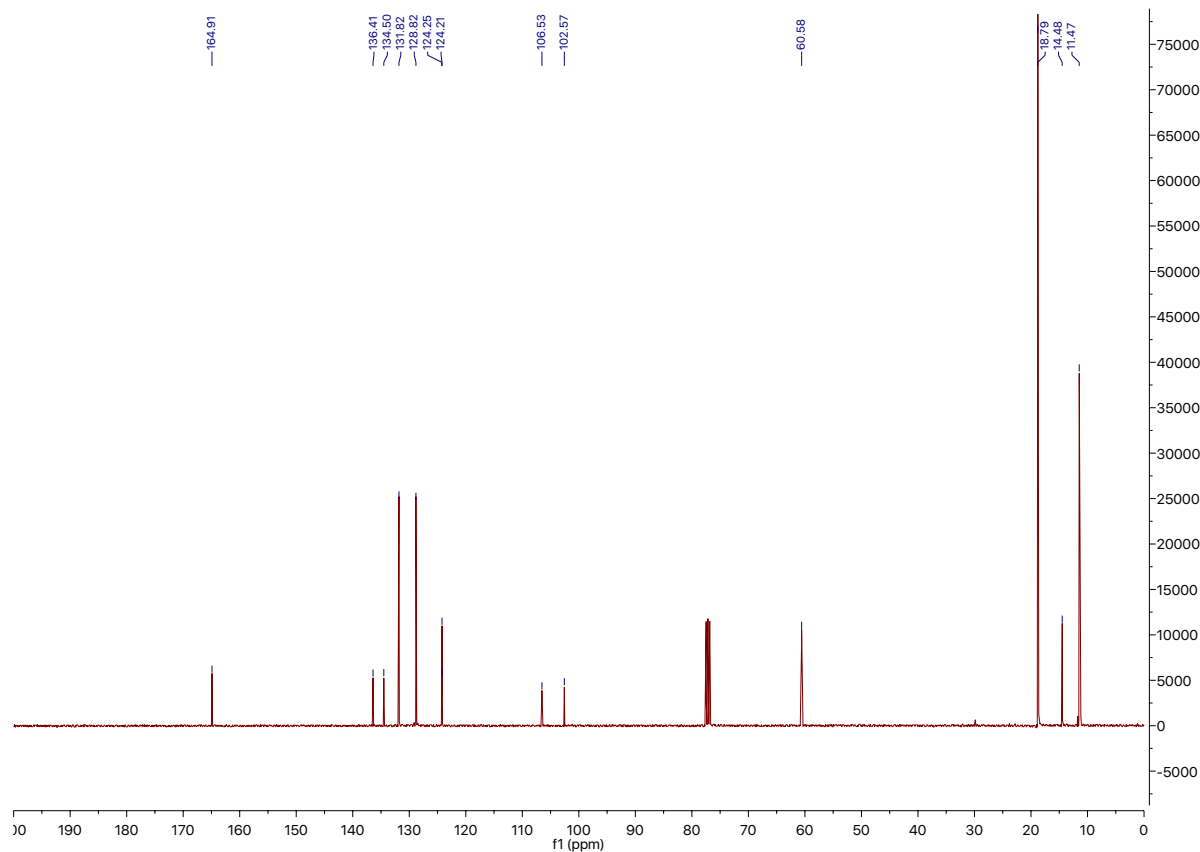

*Ethyl (Z)-2,3-diphenyl-5-(triisopropylsilyl)pent-2-en-4-ynoate (9e)*

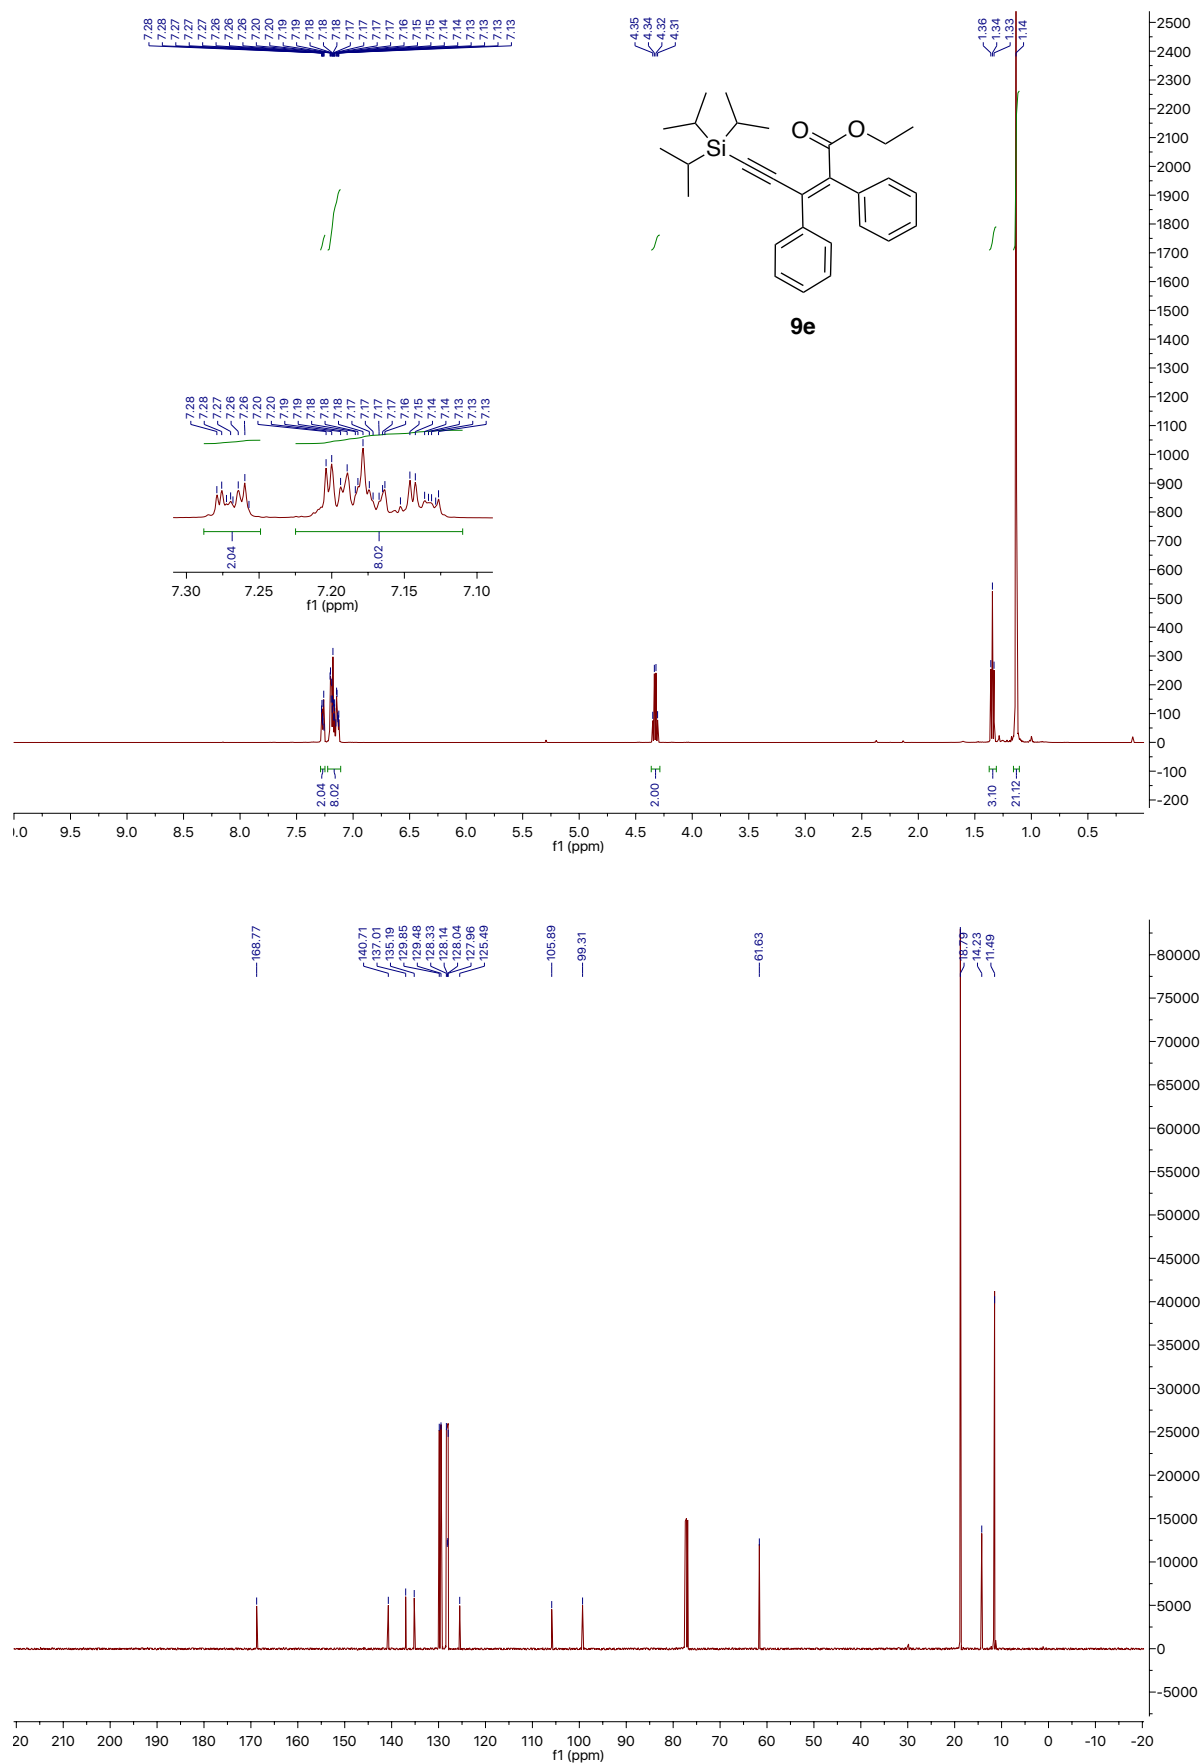



**1-(2-((Triisopropylsilyl)ethynyl)cyclopent-1-en-1-yl)ethan-1-one (9g)**

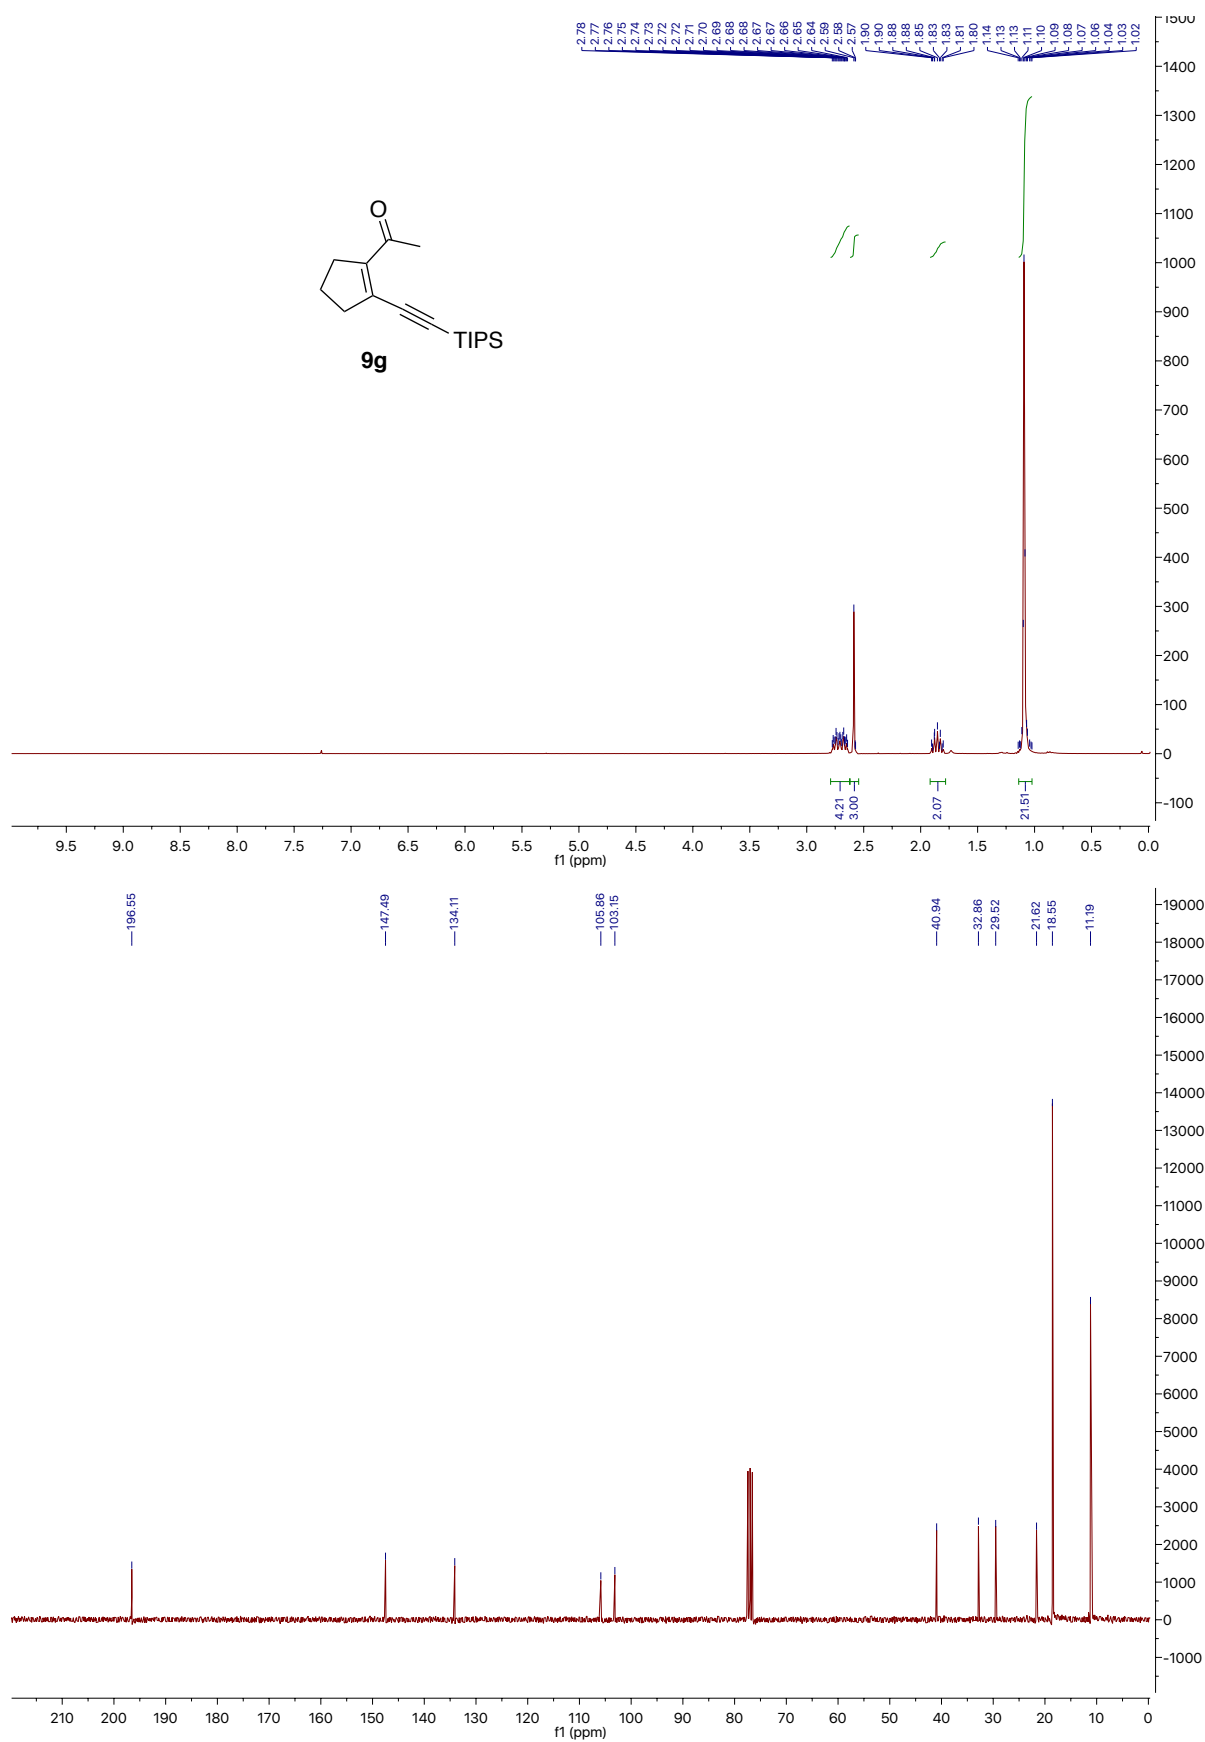

## 2-((Triisopropylsilyl)ethynyl)phenyl pivalate (11a)

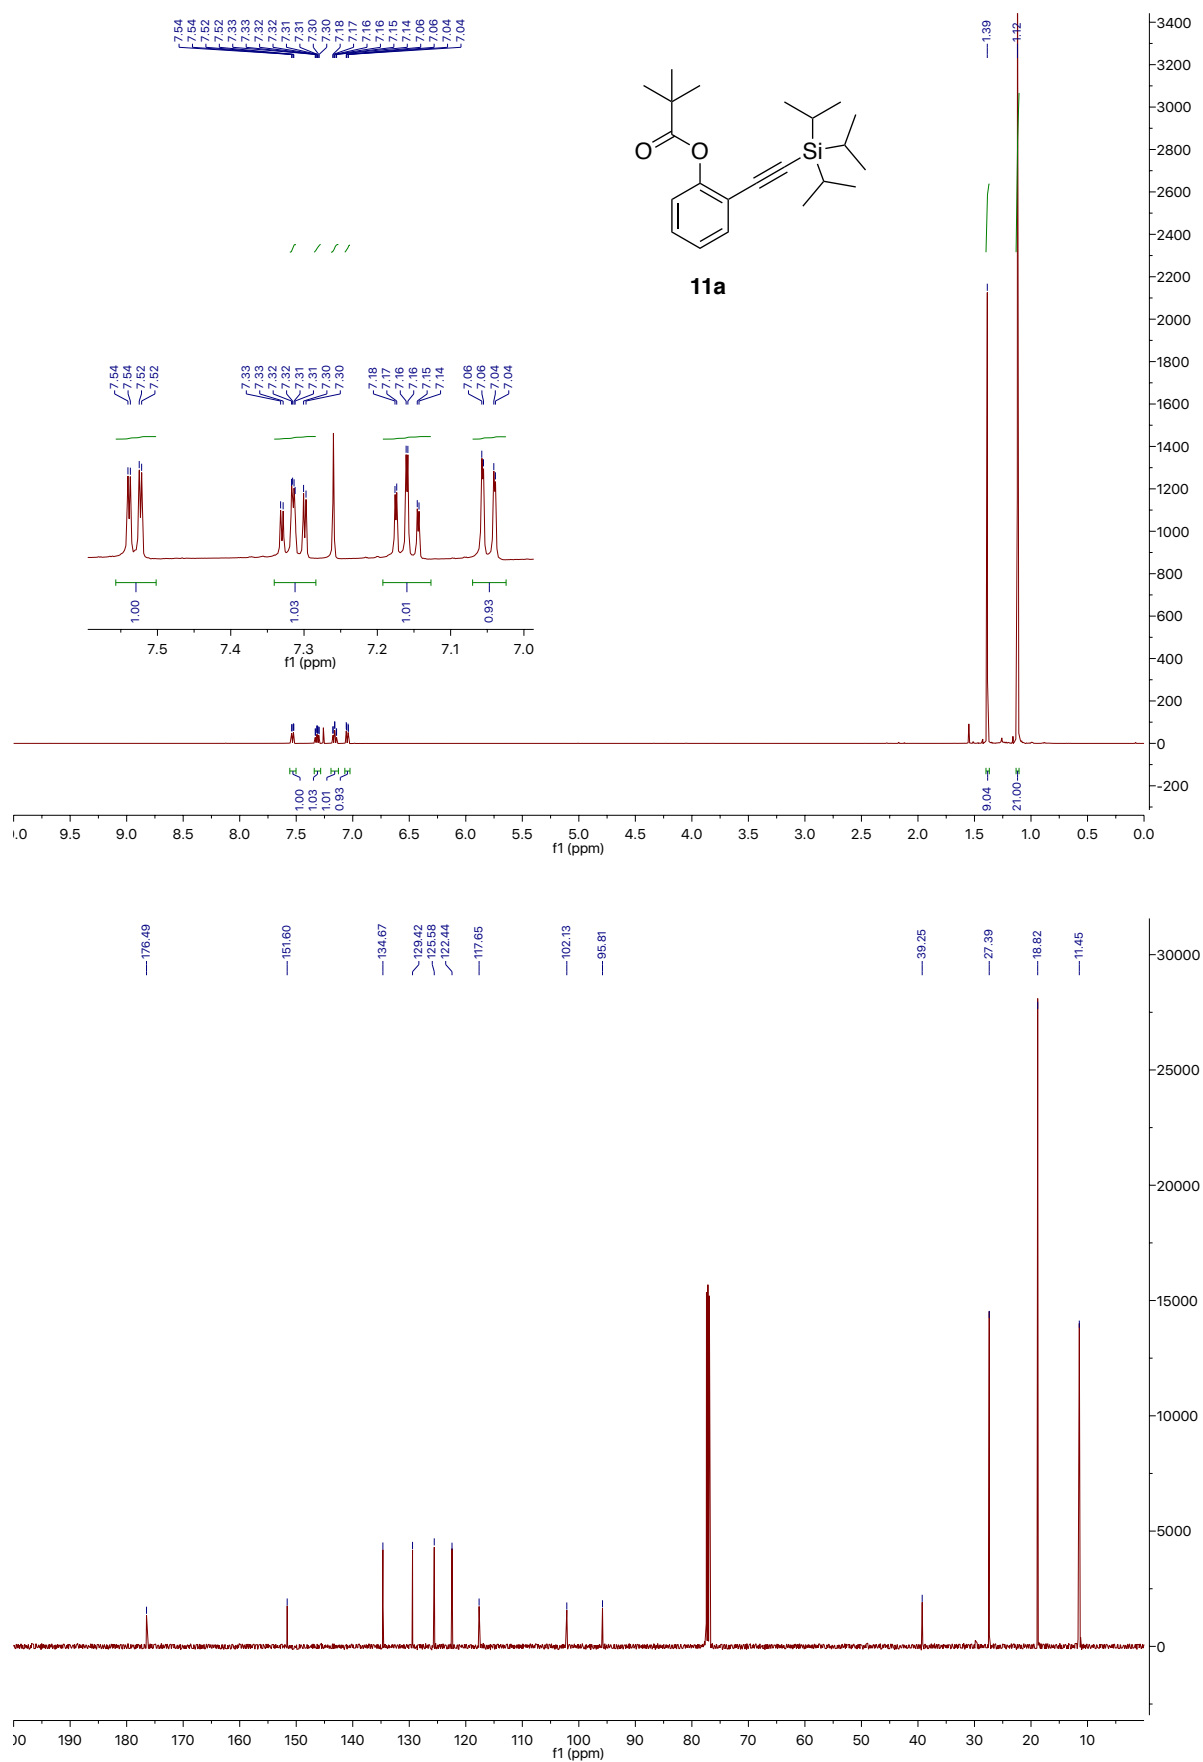

**2-((Triisopropylsilyl)ethynyl)naphthalen-1-yl acetate (11b)**

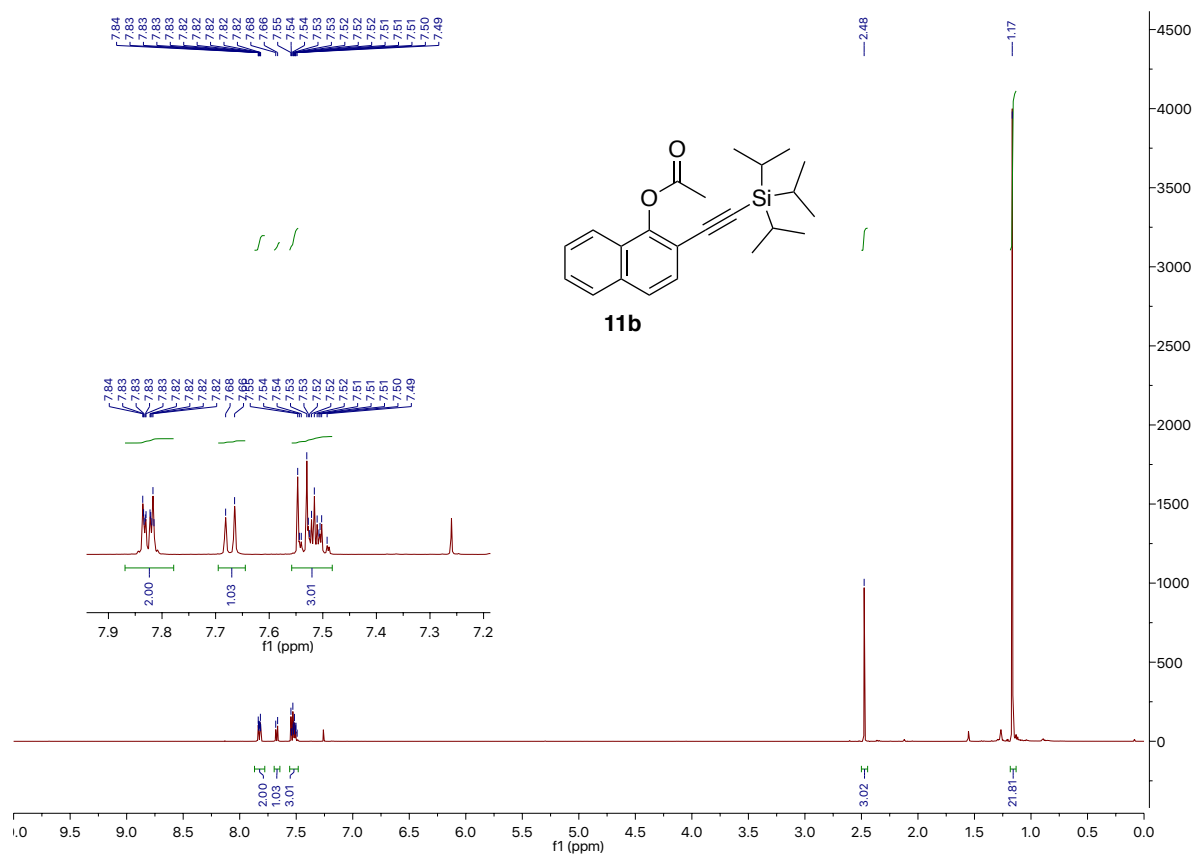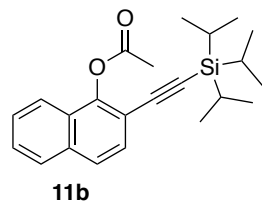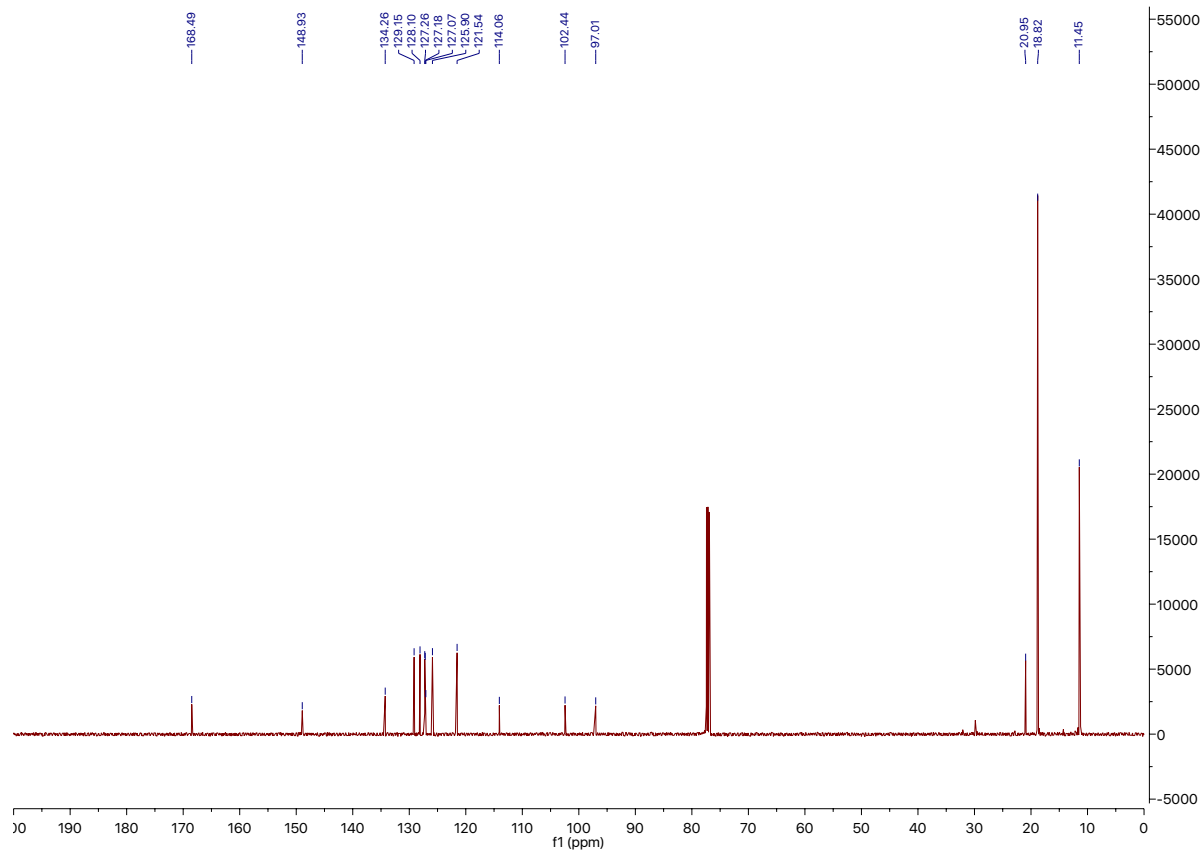

**Triisopropyl((2-(methylsulfinyl)phenyl)ethynyl)silane (11c)**

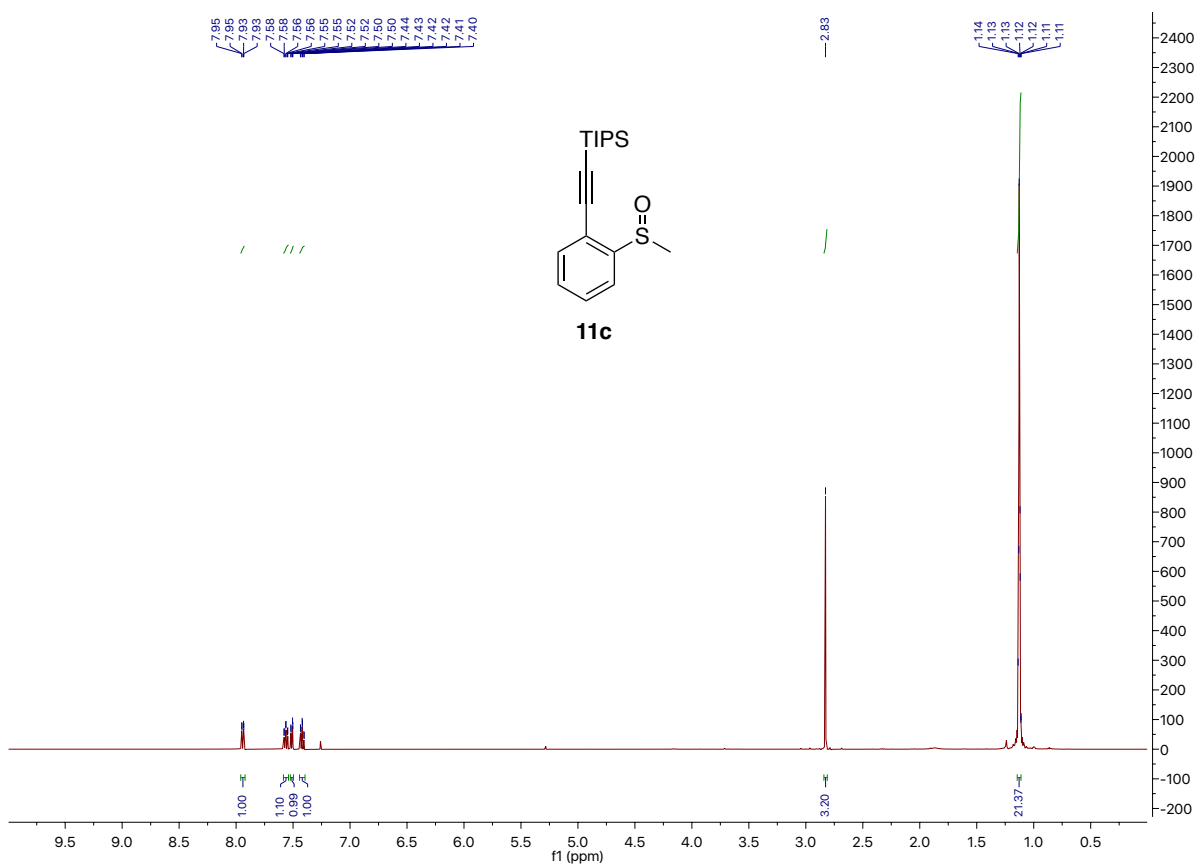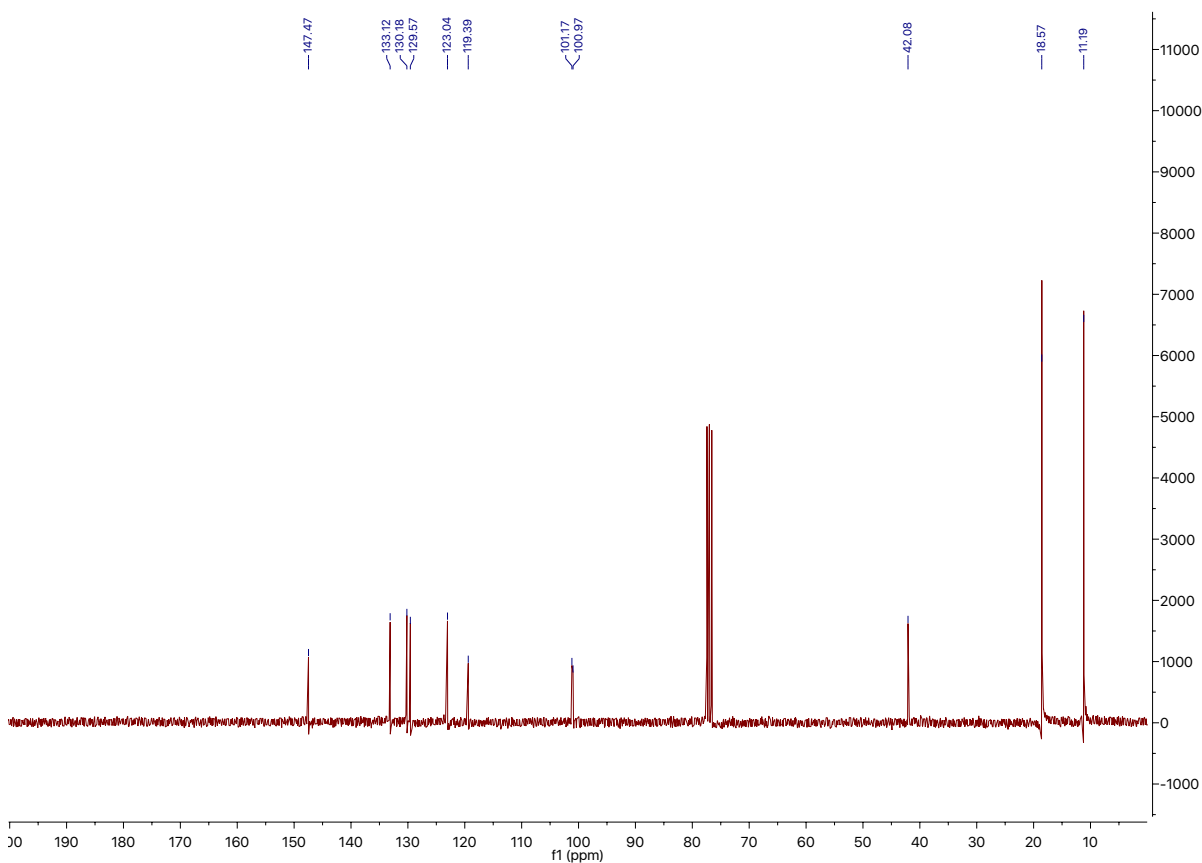



**(Z)-Triisopropyl(5-(phenylthio)pent-3-en-1-yn-1-yl)silane (11d)**

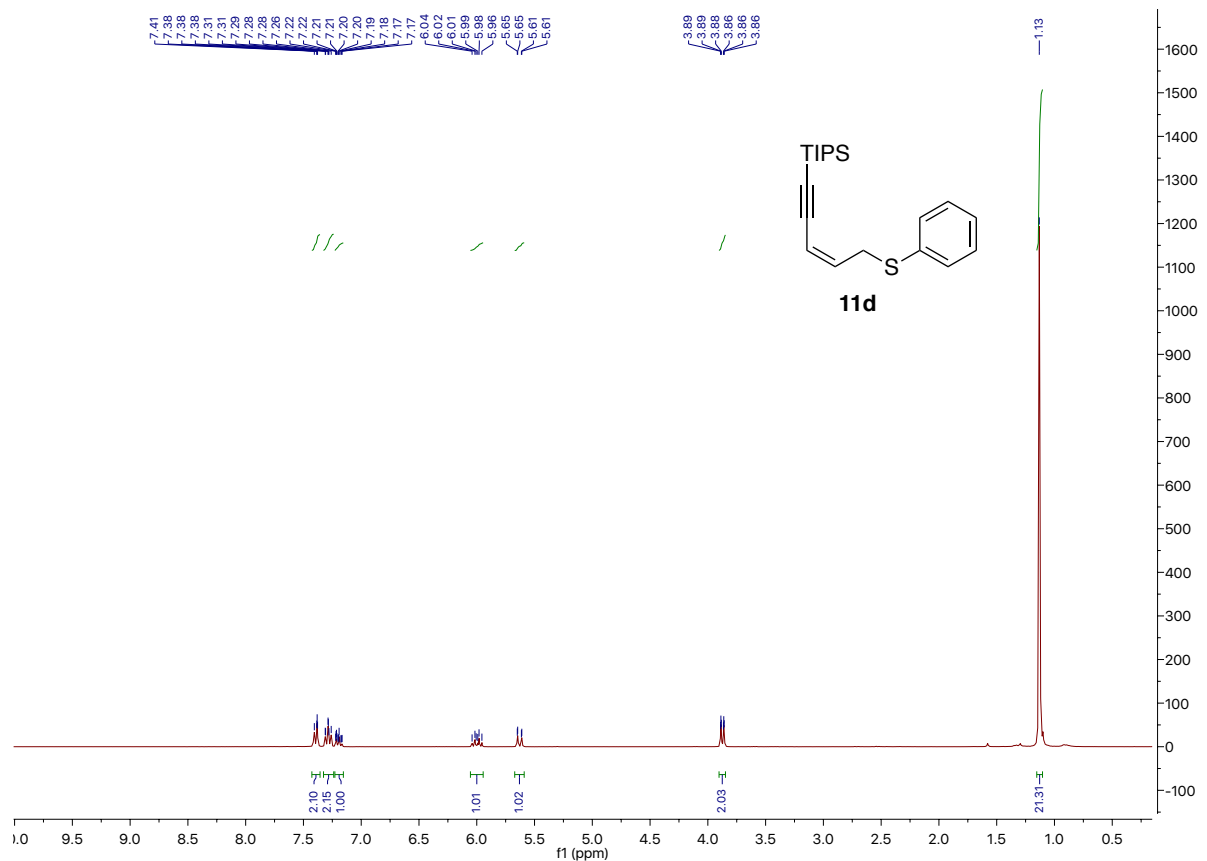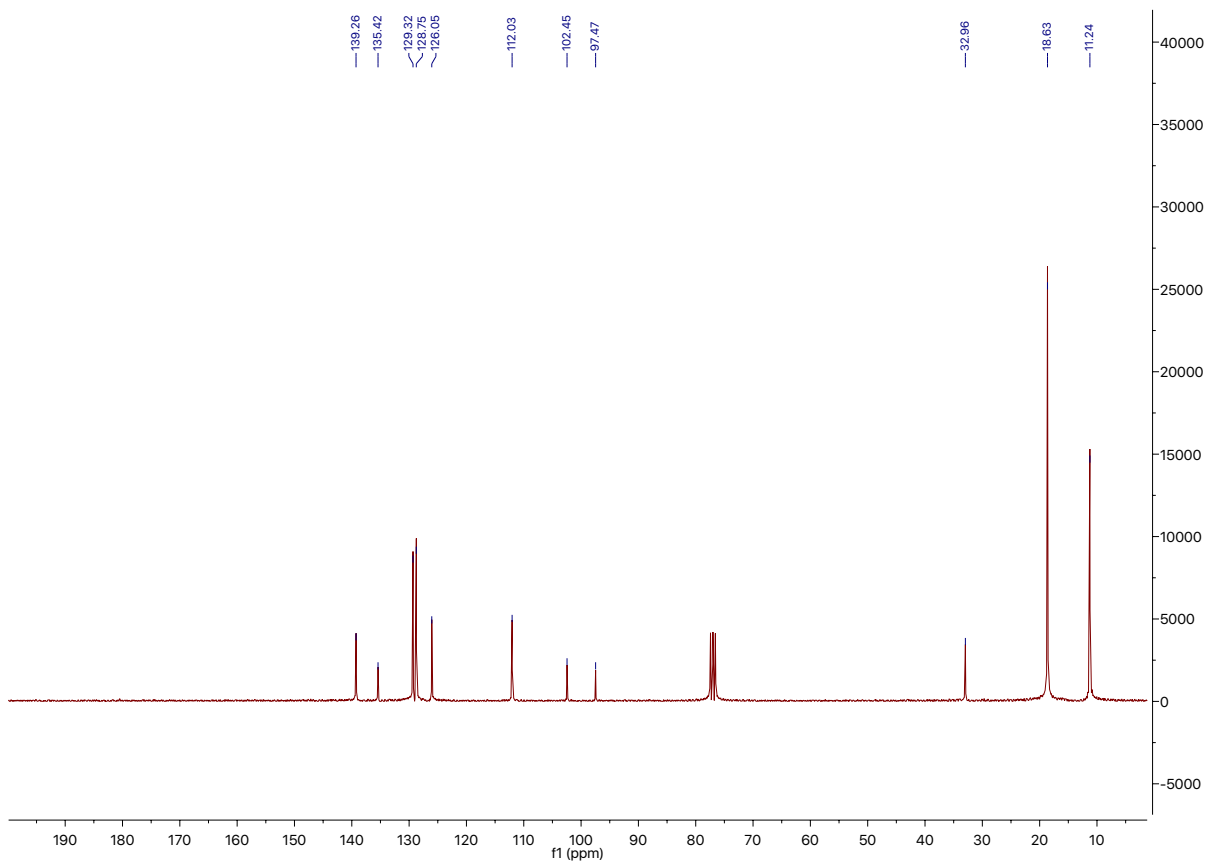

**((2-(1,3-Dithian-2-yl)phenyl)ethynyl)triisopropylsilane (11e)**

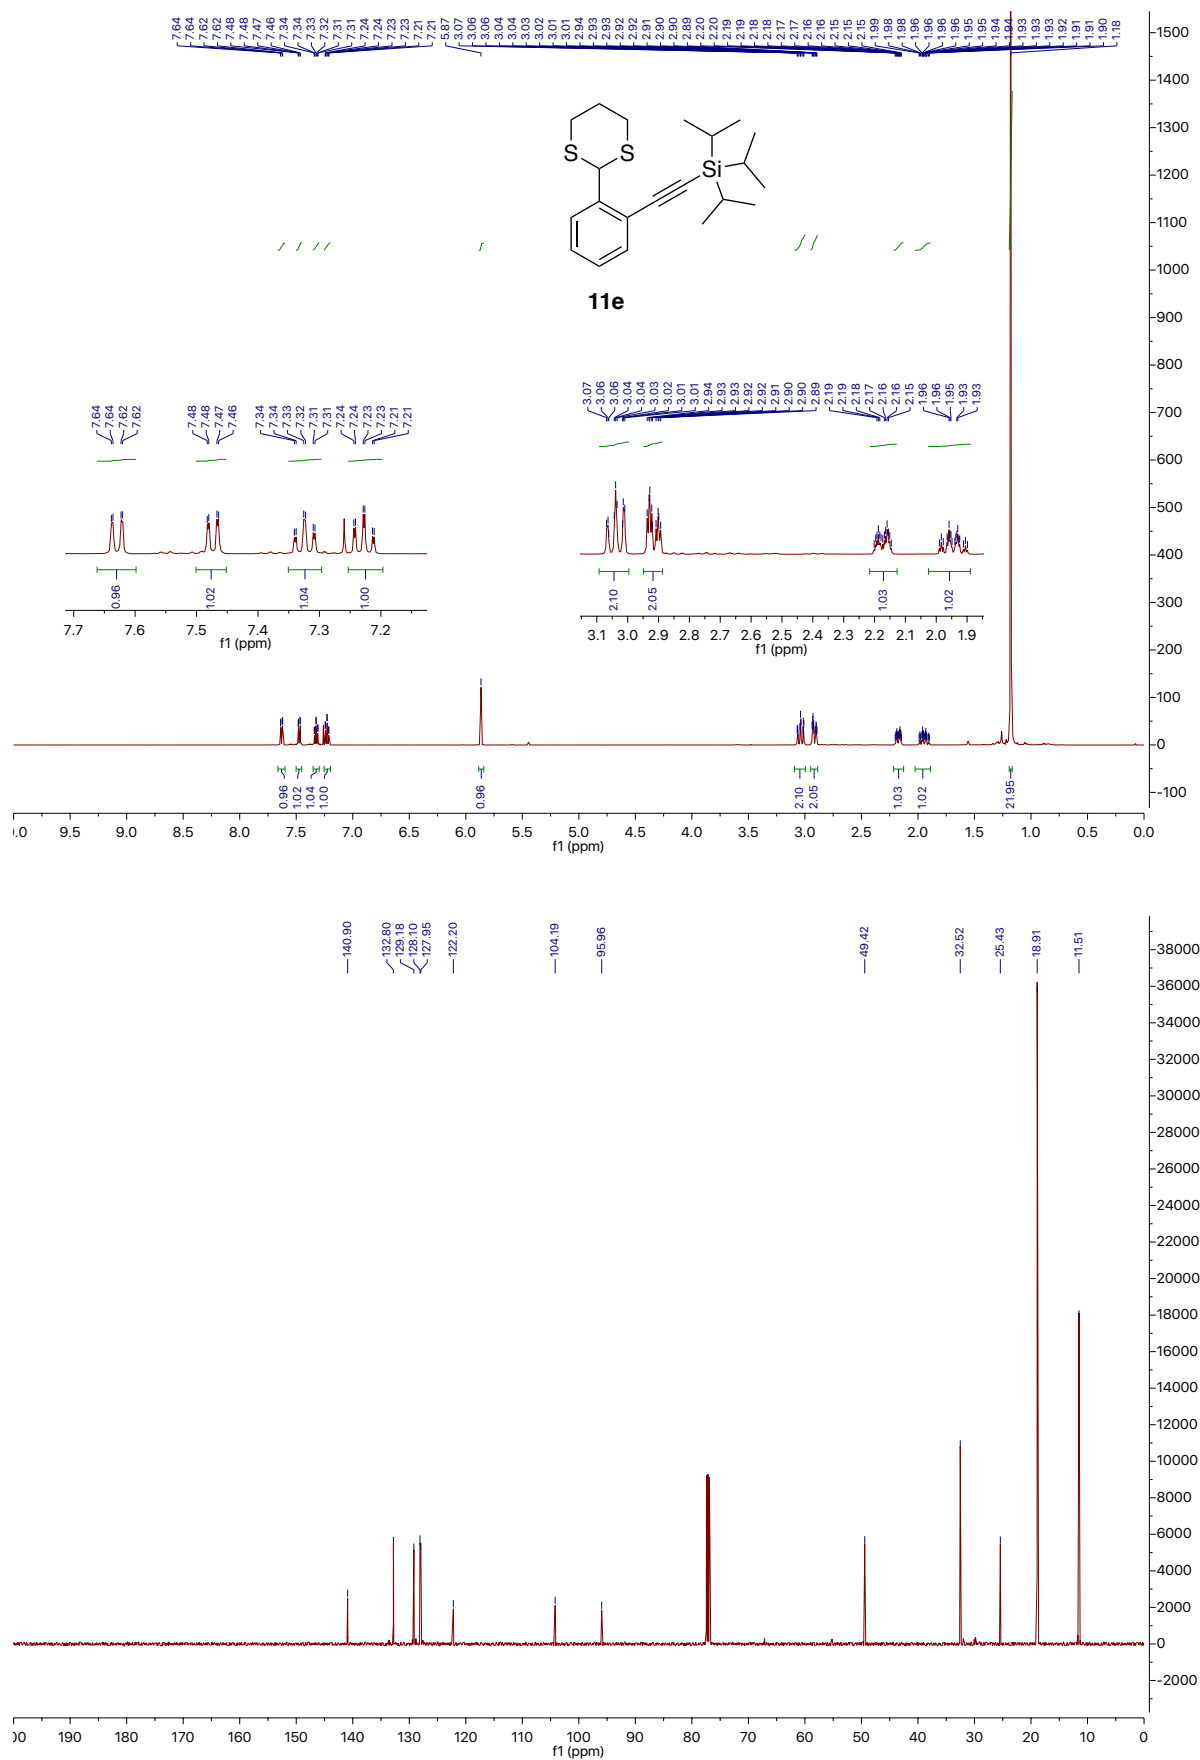

***((2-((Methylthio)methyl)-1,3-phenylene)bis(ethyne-2,1-diyl))bis(triisopropylsilane) (11f)***

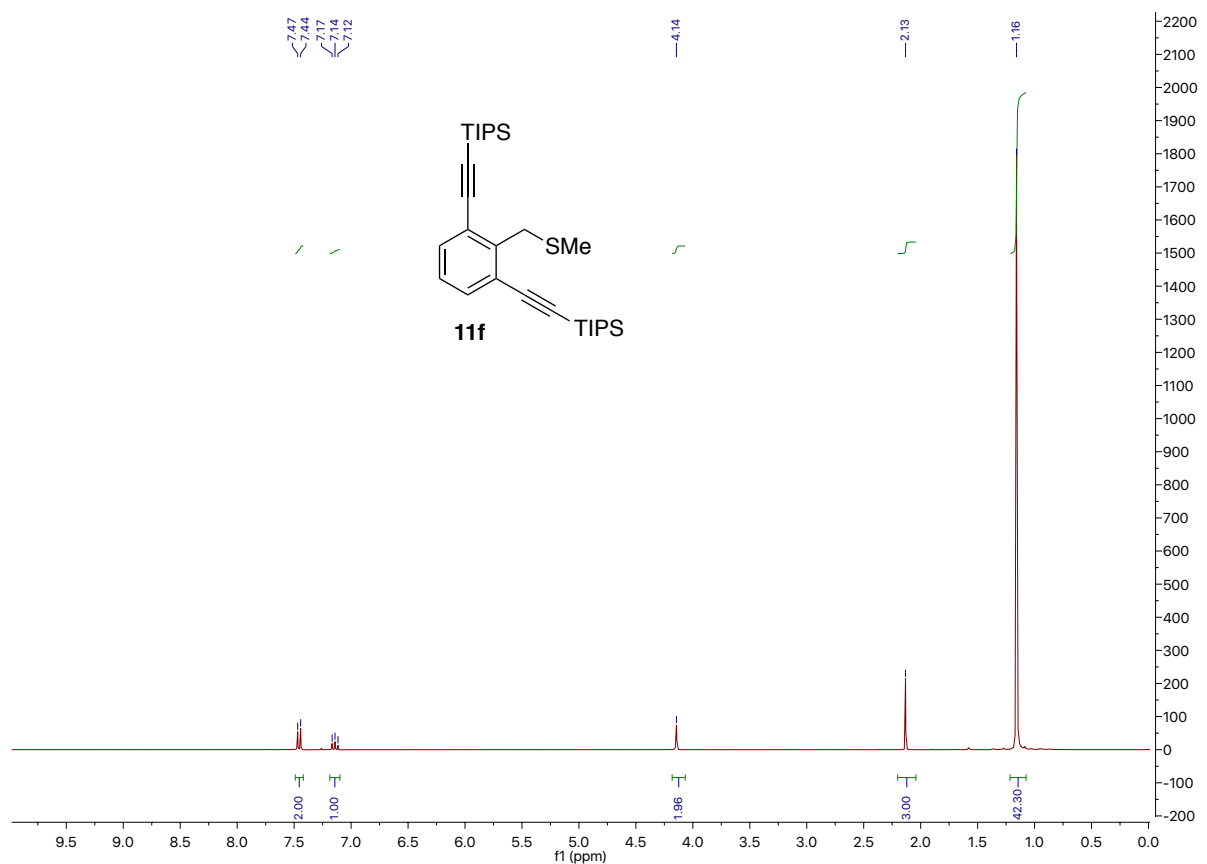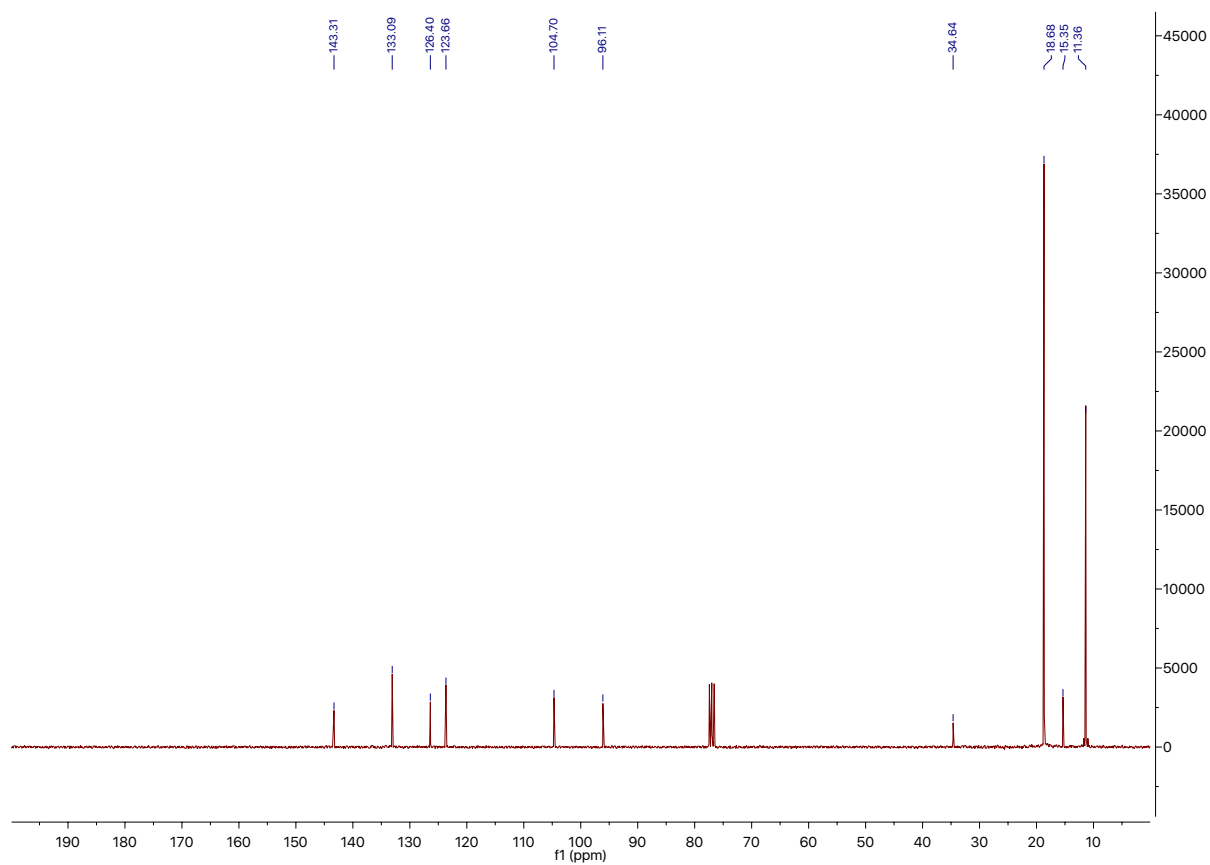

***((5-Chloro-2-(methylsulfonyl)-1,3-phenylene)bis(ethyne-2,1-diyl))bis(triisopropylsilane) (11g)***

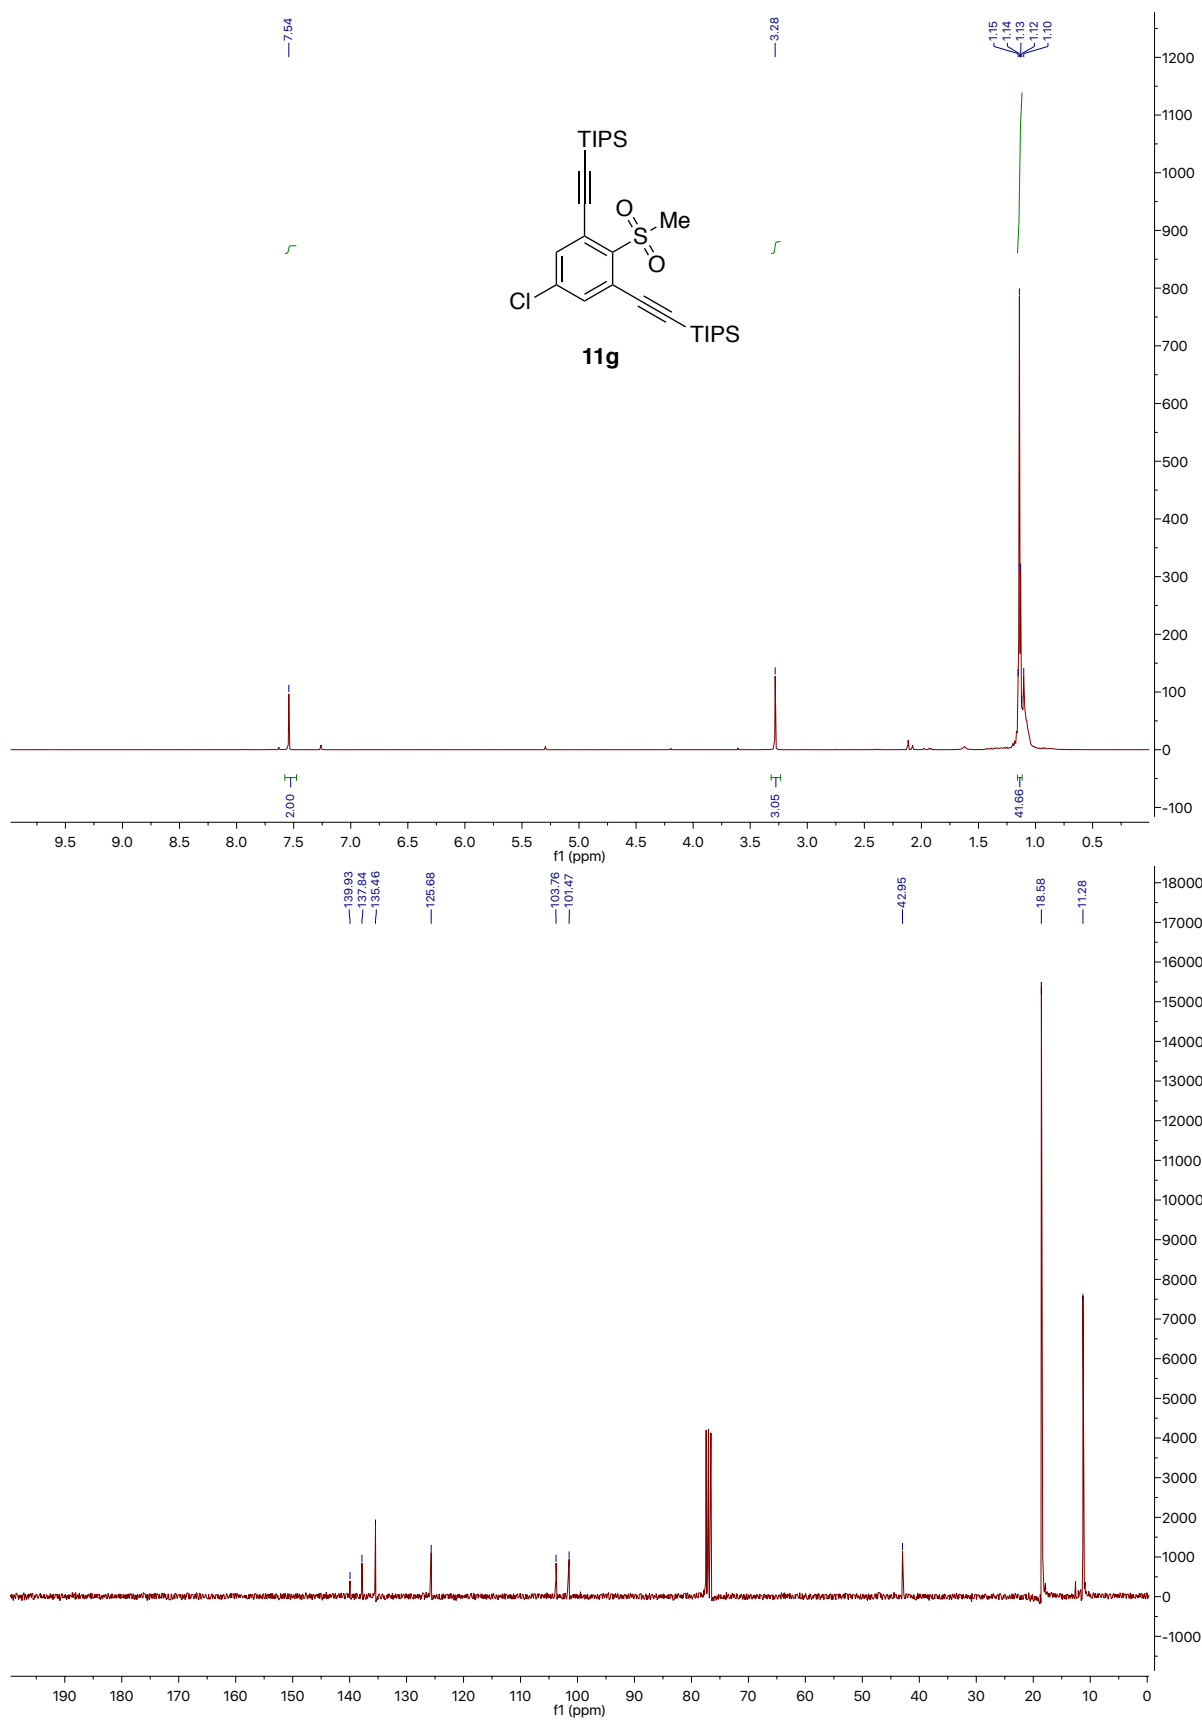

**1-(2,6-Bis((triisopropylsilyl)ethynyl)phenyl)-N,N-dimethylmethanamine (11h)**

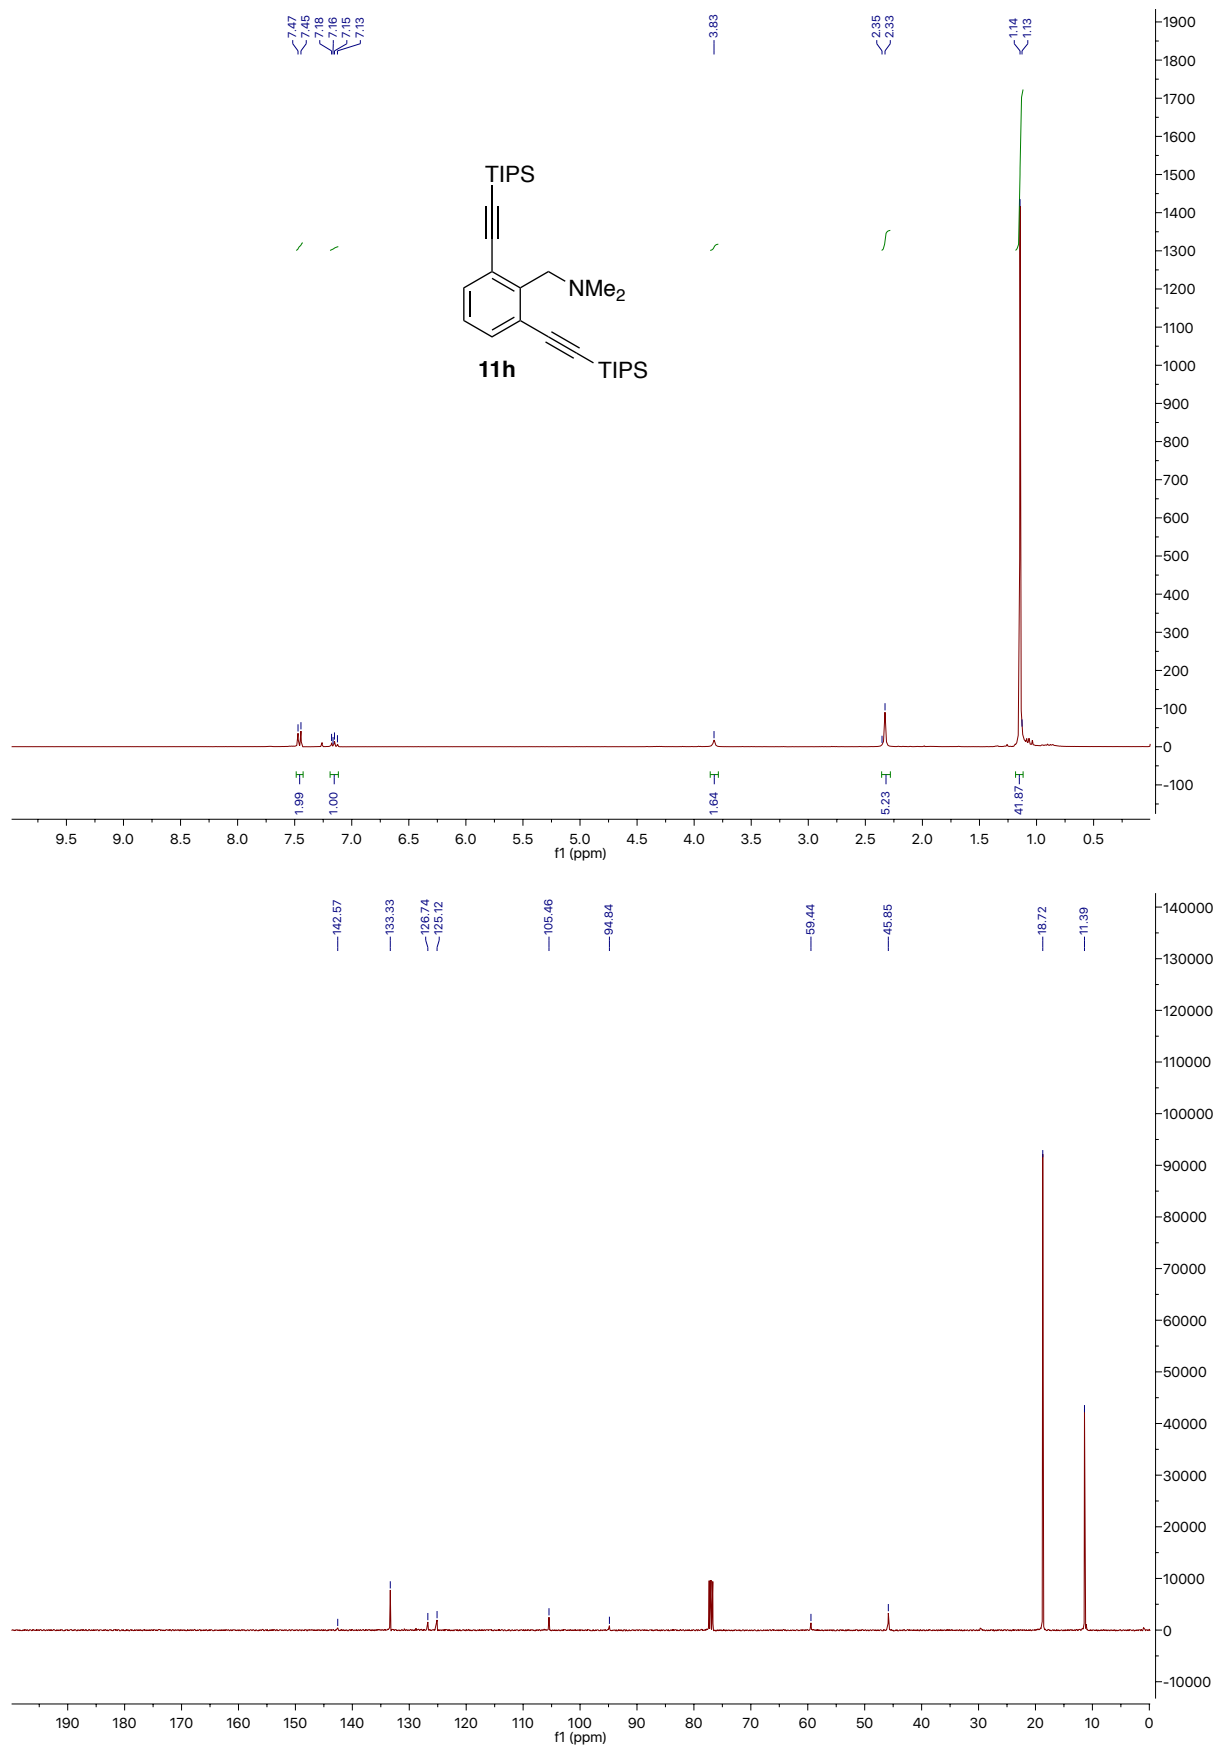

*Tert-butyl 2,5-bis((triisopropylsilyl)ethynyl)-1H-pyrrole-1-carboxylate (11i)*

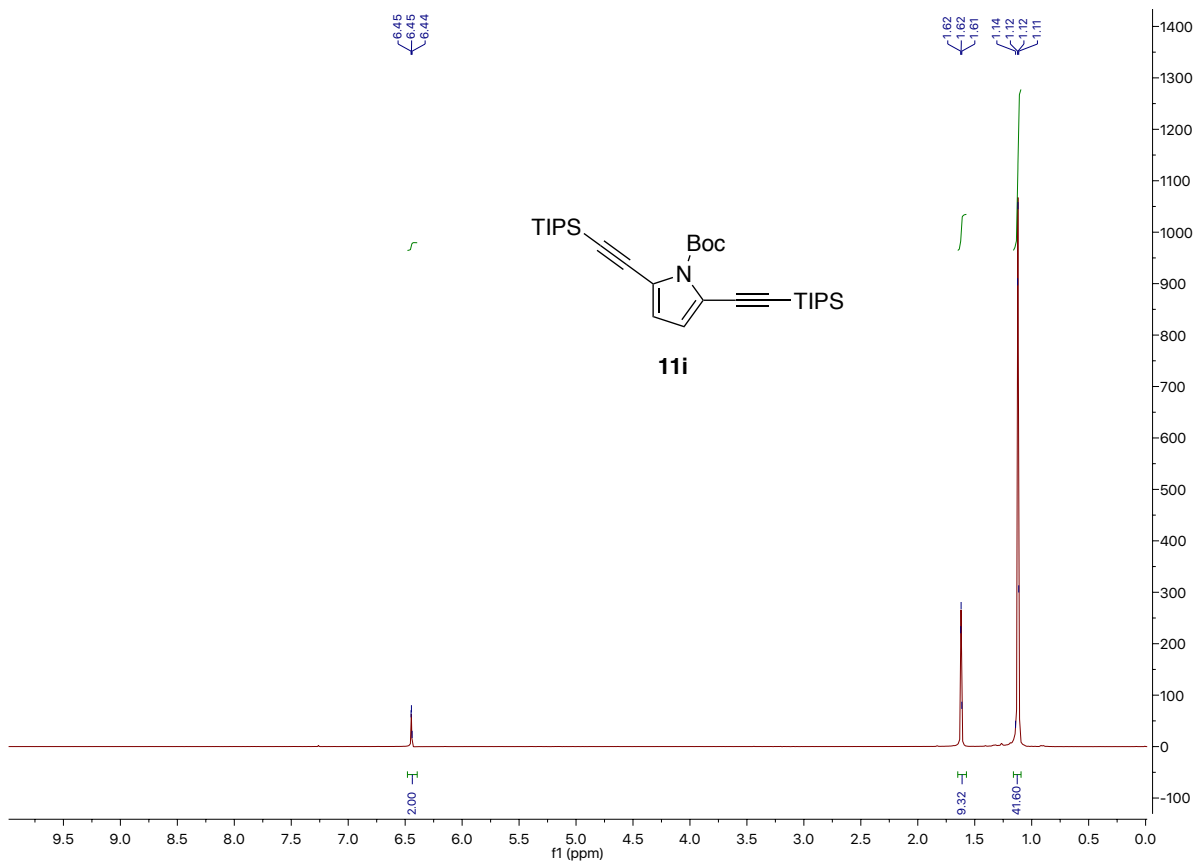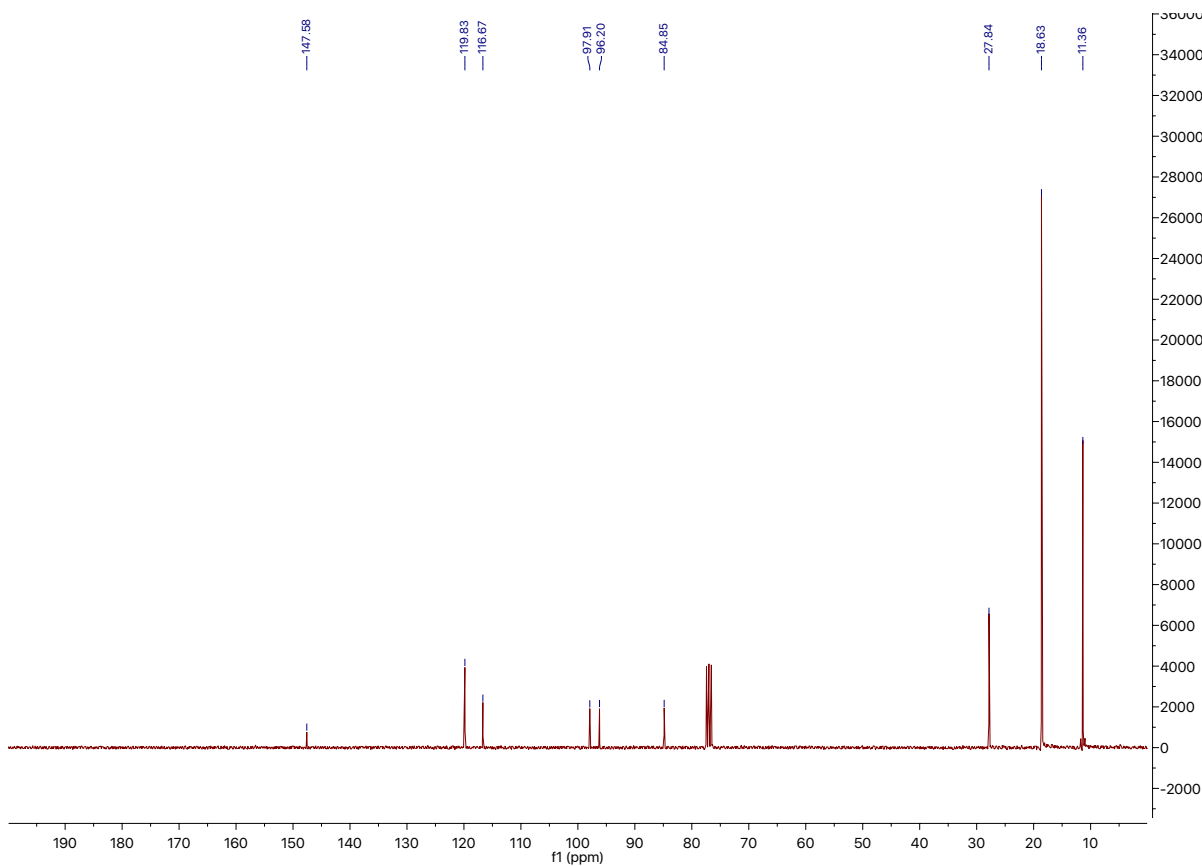

## 7) DFT Mechanistic Studies

### 7.1. Computational methods

Calculations were performed by means of the Gaussian 09 suite of programs.<sup>4</sup> DFT was applied using wB97XD.<sup>5</sup> Rh, Ag, K and Br atoms were described by ECP with the LANL2DZ basis set.<sup>6</sup> Polarization functions were added for Rh ( $\zeta_f= 1.35$ ), Ag ( $\zeta_f= 1.611$ ), K ( $\zeta_d= 1.000$ ) and Br ( $\zeta_d= 0.428$ ).<sup>7</sup> The 6-31G(d) basis set<sup>8</sup> was employed for all remaining atoms (C, H, O, Si and F). Full geometry optimizations were carried out in 1,2-dichloroethane, through an implicit solvent SMD.<sup>9</sup> The stationary points were characterized by vibrational analysis. Transition states were identified by the presence of one imaginary frequency while minima by a full set of real frequencies. The connectivity of the transition states was confirmed by relaxing each transition state towards both the reactant and the product. Reported energies are potential energies (E) and free energies (G) in solution, computed at 298 K and 1 atm. Mulliken charges<sup>10</sup> were calculated at the same level of theory.

## 7.2. Mechanism of the Rh-Catalyzed *ortho*-Alkynylation of Methyl Benzoate

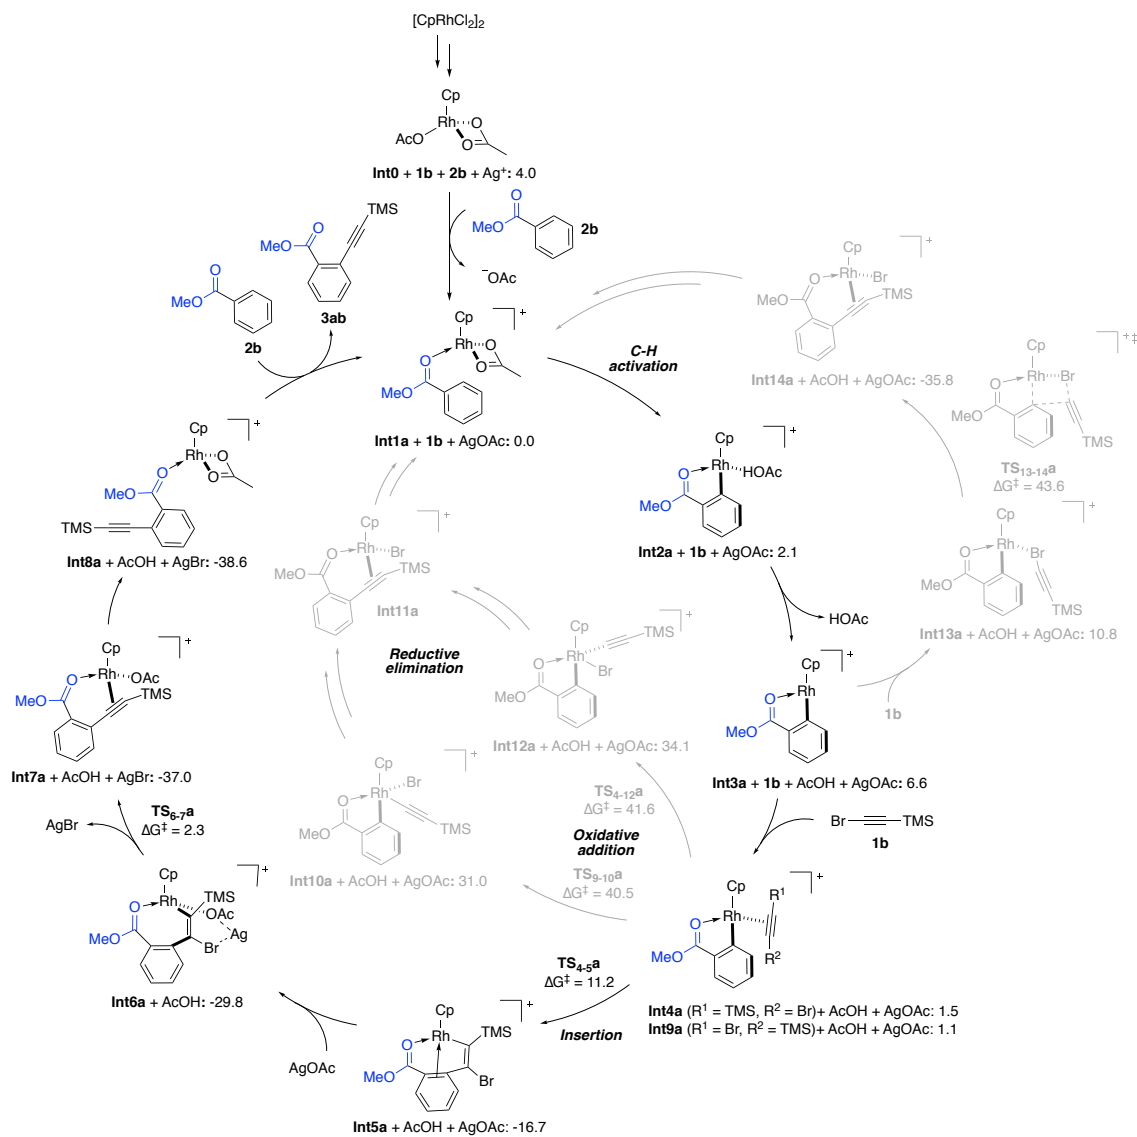

Scheme S7.2.1- Rh-catalyzed *ortho*-alkynylation of methyl benzoate.<sup>a</sup>

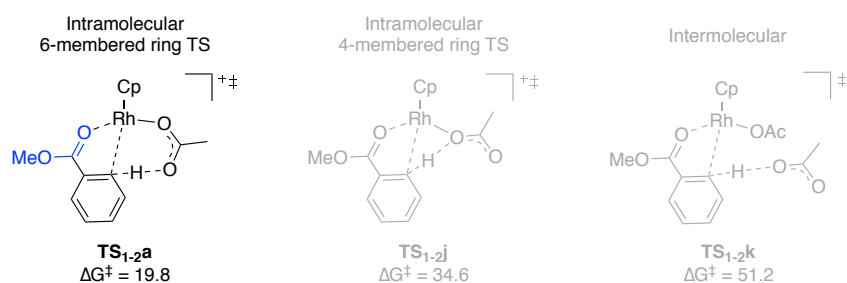

Scheme S7.2.2 - Acetate-assisted C-H activation of methyl benzoate.<sup>a</sup>





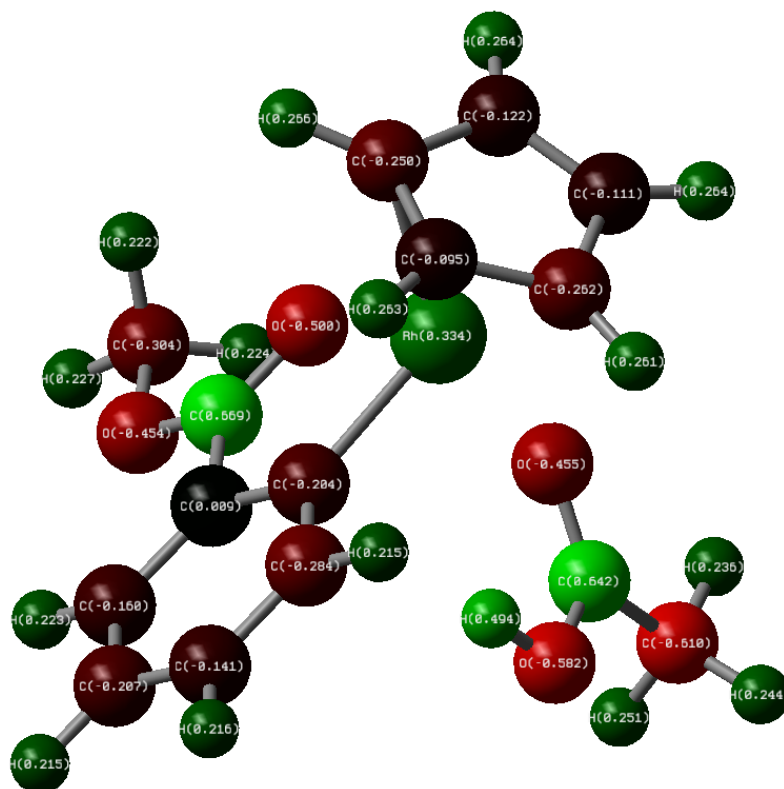

<sup>a</sup> Colored atoms by charge: from more positive in green to more negative in red.

**Figure S7.2.3-Mulliken atomic charges on Int2a<sup>a</sup>**

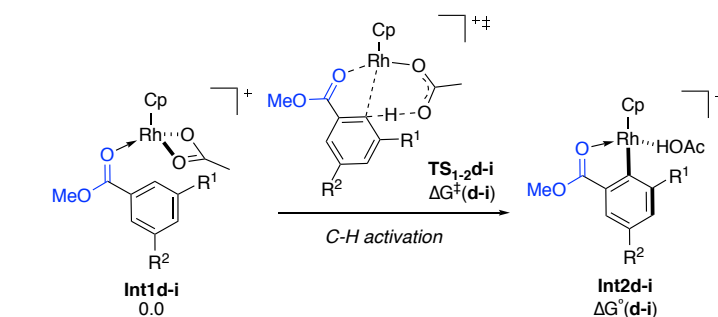

| Entry | R <sup>1</sup> | R <sup>2</sup>  | TS <sub>1-2d-i</sub> | $\Delta G^\ddagger(\text{d-i})$ | Int2d-i | $\Delta G^\circ(\text{d-i})$ |
|-------|----------------|-----------------|----------------------|---------------------------------|---------|------------------------------|
| 1     | H              | OMe             | TS <sub>1-2d</sub>   | 17.2                            | Int2d   | 2.9                          |
| 2     | H              | Me              | TS <sub>1-2e</sub>   | 18.9                            | Int2e   | 3.3                          |
| 3     | H              | Br              | TS <sub>1-2f</sub>   | 20.8                            | Int2f   | 3.1                          |
| 4     | H              | CF <sub>3</sub> | TS <sub>1-2g</sub>   | 21.5                            | Int2g   | 3.4                          |
| 5     | H              | F               | TS <sub>1-2h</sub>   | 19.5                            | Int2h   | 2.5                          |
| 6     | F              | H               | TS <sub>1-2i</sub>   | 17.8                            | Int2i   | 2.7                          |

<sup>a</sup> Free energies in kcal/mol.

**Table S7.2.1- Acetate-assisted C-H activation of substituted methyl benzoates<sup>a</sup>**

**Inf0**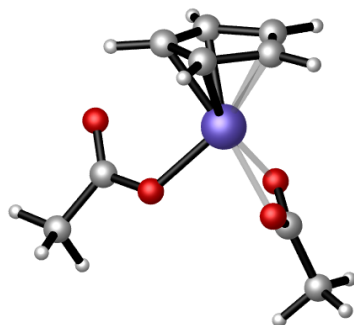

E = -759.835759 Hartrees  
G = -759.689661 Hartrees

|    |           |           |           |
|----|-----------|-----------|-----------|
| 6  | 2.283685  | -3.478474 | 1.806403  |
| 1  | 3.339915  | -3.262176 | 1.876079  |
| 6  | 1.371126  | -2.904016 | 0.877140  |
| 1  | 1.635122  | -2.218751 | 0.084607  |
| 6  | 0.098215  | -3.510413 | 1.072353  |
| 1  | -0.797072 | -3.317623 | 0.496750  |
| 6  | 1.544581  | -4.394129 | 2.640964  |
| 1  | 1.960984  | -5.009570 | 3.427469  |
| 6  | 0.208419  | -4.417520 | 2.189833  |
| 1  | -0.581736 | -5.052174 | 2.568908  |
| 45 | 1.514357  | -5.035002 | 0.566852  |
| 8  | 2.107713  | -5.012355 | -1.392354 |
| 6  | 3.069611  | -4.230541 | -1.782050 |
| 8  | 3.676290  | -3.425049 | -1.079617 |
| 6  | 3.410440  | -4.419865 | -3.251254 |
| 1  | 3.852251  | -5.411886 | -3.396689 |
| 1  | 2.505532  | -4.370309 | -3.864526 |
| 1  | 4.122505  | -3.660136 | -3.580005 |
| 8  | 2.676035  | -6.850182 | 0.630600  |
| 8  | 0.614870  | -6.898994 | -0.070721 |
| 6  | 1.720242  | -7.496727 | 0.100287  |
| 6  | 1.910288  | -8.911448 | -0.351835 |
| 1  | 0.957858  | -9.445552 | -0.352916 |
| 1  | 2.303484  | -8.898306 | -1.374803 |
| 1  | 2.632893  | -9.424087 | 0.287053  |

**AcOH**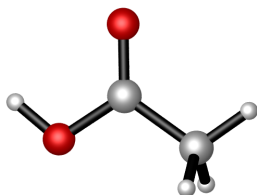

E = -229.014845 Hartrees  
G = -228.979969 Hartrees

|   |           |           |           |
|---|-----------|-----------|-----------|
| 6 | 0.109757  | -0.842062 | -0.660169 |
| 1 | 0.705436  | -1.659712 | -1.079057 |
| 1 | -0.172305 | -0.147587 | -1.451981 |
| 1 | -0.787886 | -1.281913 | -0.213802 |
| 6 | 0.902411  | -0.121136 | 0.390822  |
| 8 | 1.212131  | 1.049233  | 0.369645  |
| 8 | 1.250381  | -0.937895 | 1.400097  |
| 1 | 1.756280  | -0.406719 | 2.041368  |

**AgOAc**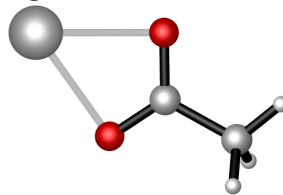

E = -374.200558 Hartrees  
G = -374.182650 Hartrees

|    |           |           |           |
|----|-----------|-----------|-----------|
| 6  | 0.092255  | -0.865802 | -0.689164 |
| 1  | 0.668266  | -1.714190 | -1.072454 |
| 1  | -0.161764 | -0.194654 | -1.511790 |
| 1  | -0.828603 | -1.269608 | -0.254531 |
| 6  | 0.889778  | -0.152432 | 0.389023  |
| 8  | 1.306088  | -0.848963 | 1.359134  |
| 8  | 1.098720  | 1.086484  | 0.274714  |
| 47 | 2.348071  | 1.044324  | 2.314410  |

**AgBr**

E = -159.009364 Hartrees  
G = -159.034547 Hartrees

|    |           |          |          |
|----|-----------|----------|----------|
| 47 | -1.018886 | 1.131621 | 0.000000 |
| 35 | 1.508516  | 1.131621 | 0.000000 |

**Ag<sup>+</sup>**

E = -145.614434 Hartrees  
G = -145.631040 Hartrees

**(Bromoethynyl)trimethylsilane (1b)**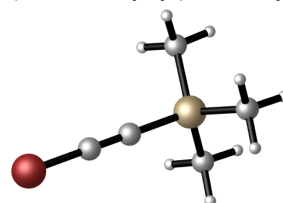

E = -498.509006 Hartrees  
G = -498.423476 Hartrees

|    |           |           |           |
|----|-----------|-----------|-----------|
| 6  | -2.312030 | -0.244284 | -0.001118 |
| 6  | -1.096463 | -0.241889 | 0.000717  |
| 35 | -4.118071 | -0.246785 | -0.002924 |
| 14 | 0.759521  | -0.239095 | 0.001337  |
| 6  | 1.331808  | 1.547469  | -0.061550 |
| 1  | 0.975276  | 2.112279  | 0.807488  |
| 1  | 2.428049  | 1.595116  | -0.067295 |
| 1  | 0.968728  | 2.050477  | -0.965239 |
| 6  | 1.330437  | -1.082498 | 1.576956  |
| 1  | 0.958418  | -2.111974 | 1.635778  |
| 1  | 2.426454  | -1.118386 | 1.614092  |
| 1  | 0.982217  | -0.546413 | 2.467413  |
| 6  | 1.331290  | -1.185587 | -1.514619 |
| 1  | 0.969711  | -0.719248 | -2.438291 |
| 1  | 2.427457  | -1.209709 | -1.557128 |
| 1  | 0.973305  | -2.221541 | -1.495616 |

2b

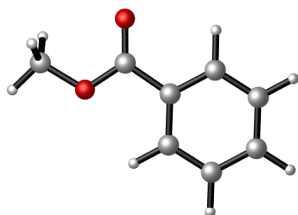

E = -459.980113 Hartrees

G = -459.868594 Hartrees

|   |           |           |           |
|---|-----------|-----------|-----------|
| 6 | 0.909464  | -0.640936 | -0.213899 |
| 6 | 2.247297  | -0.682639 | -0.604321 |
| 6 | 3.041161  | 0.455306  | -0.500139 |
| 6 | 2.494316  | 1.641909  | -0.002072 |
| 6 | 1.152674  | 1.680993  | 0.387626  |
| 6 | 0.362783  | 0.541526  | 0.283504  |
| 1 | 0.292911  | -1.531306 | -0.297022 |
| 1 | 2.673007  | -1.602620 | -0.993412 |
| 1 | 4.081867  | 0.423893  | -0.803687 |
| 1 | 0.740126  | 2.608421  | 0.771382  |
| 1 | -0.679120 | 0.575814  | 0.587227  |
| 6 | 3.295462  | 2.892612  | 0.122647  |
| 8 | 2.849418  | 3.950984  | 0.516794  |
| 8 | 4.568962  | 2.726656  | -0.248337 |
| 6 | 5.395990  | 3.891246  | -0.182254 |
| 1 | 5.430892  | 4.283556  | 0.837190  |
| 1 | 6.387959  | 3.564618  | -0.494471 |
| 1 | 5.023949  | 4.664305  | -0.859625 |

Int1a

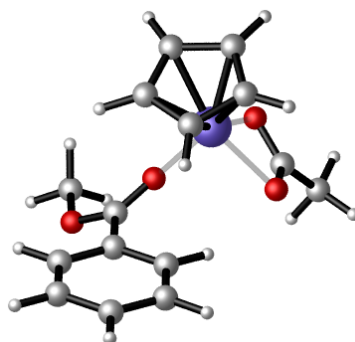

E = -991.249669 Hartrees

G = -991.013054 Hartrees

|    |           |           |           |
|----|-----------|-----------|-----------|
| 6  | 2.783836  | -4.013830 | 2.077772  |
| 1  | 3.735608  | -4.428073 | 2.384121  |
| 6  | 2.585678  | -3.058693 | 1.051690  |
| 1  | 3.361806  | -2.606937 | 0.448017  |
| 6  | 1.171311  | -2.848429 | 0.902673  |
| 1  | 0.697763  | -2.183330 | 0.193675  |
| 6  | 1.492812  | -4.431630 | 2.556347  |
| 1  | 1.303483  | -5.166554 | 3.326882  |
| 6  | 0.505399  | -3.673556 | 1.847369  |
| 1  | -0.566603 | -3.787361 | 1.945147  |
| 45 | 1.631848  | -4.920920 | 0.509069  |
| 8  | 2.321821  | -6.966166 | 0.491525  |
| 8  | 0.251530  | -6.491909 | 0.043758  |
| 6  | 1.166811  | -7.369903 | 0.148099  |
| 6  | 0.888124  | -8.813432 | -0.110275 |
| 1  | -0.024180 | -8.927788 | -0.698296 |
| 1  | 1.734879  | -9.277836 | -0.621172 |
| 1  | 0.753548  | -9.319662 | 0.852349  |
| 6  | 0.182445  | -5.106443 | -2.929914 |
| 6  | -0.602868 | -5.919658 | -3.753779 |
| 6  | -0.324201 | -3.898493 | -2.441677 |
| 6  | -1.898018 | -5.527105 | -4.070971 |
| 1  | -0.206664 | -6.855621 | -4.132473 |
| 6  | -1.615456 | -3.506736 | -2.770426 |
| 1  | 0.303088  | -3.264875 | -1.824939 |
| 6  | -2.403821 | -4.323798 | -3.580223 |
| 1  | -2.514285 | -6.159960 | -4.701471 |
| 1  | -2.006904 | -2.565130 | -2.398346 |
| 1  | -3.415649 | -4.020576 | -3.832113 |
| 8  | 2.189056  | -5.033423 | -1.603070 |
| 6  | 1.555116  | -5.500067 | -2.559667 |
| 8  | 2.095464  | -6.391304 | -3.354838 |
| 6  | 3.406153  | -6.881135 | -3.009205 |
| 1  | 3.418400  | -7.225014 | -1.973449 |
| 1  | 3.590662  | -7.704972 | -3.696520 |
| 1  | 4.145973  | -6.091331 | -3.152791 |

TS<sub>1-2a</sub>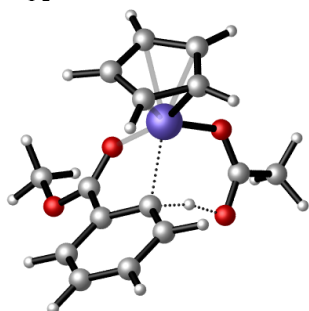

E = -991.213896 Hartrees

G = -990.981500 Hartrees

|    |           |           |           |
|----|-----------|-----------|-----------|
| 8  | -1.397831 | 1.121233  | 0.697958  |
| 6  | -1.993502 | 0.194695  | 0.085796  |
| 8  | -1.402400 | -0.816536 | -0.405811 |
| 6  | 1.815708  | 1.665014  | -0.268941 |
| 6  | 1.209841  | 0.862375  | 0.722060  |
| 6  | 2.844434  | 2.552444  | 0.026925  |
| 6  | 1.686920  | 0.970579  | 2.032903  |
| 6  | 3.303924  | 2.631362  | 1.340902  |
| 6  | 2.730090  | 1.843781  | 2.338249  |
| 1  | -0.093591 | 0.821966  | 0.687391  |
| 1  | 3.293577  | 3.158987  | -0.752791 |
| 1  | 1.221813  | 0.386414  | 2.821721  |
| 1  | 4.112029  | 3.312669  | 1.587181  |
| 1  | 3.093236  | 1.918776  | 3.358697  |
| 45 | 0.672485  | -1.047422 | -0.291731 |
| 6  | 2.460244  | -2.177855 | -0.782634 |
| 1  | 3.246015  | -1.781833 | -1.412479 |
| 6  | 1.293821  | -2.899794 | -1.238802 |
| 1  | 1.060909  | -3.145522 | -2.266222 |
| 6  | 0.505138  | -3.206063 | -0.104986 |
| 1  | -0.463275 | -3.688545 | -0.119243 |
| 6  | 2.373625  | -2.042747 | 0.620476  |
| 1  | 3.078344  | -1.519760 | 1.252597  |
| 6  | 1.132117  | -2.632291 | 1.049769  |
| 1  | 0.765513  | -2.683790 | 2.065823  |
| 6  | -3.479362 | 0.294093  | -0.116168 |
| 1  | -3.921396 | -0.695198 | -0.245534 |
| 1  | -3.943558 | 0.815307  | 0.723206  |
| 1  | -3.660457 | 0.877889  | -1.025942 |
| 8  | 0.688035  | 0.412184  | -1.926270 |
| 6  | 1.308233  | 1.448297  | -1.635310 |
| 8  | 1.539741  | 2.392861  | -2.504768 |
| 6  | 1.076688  | 2.182584  | -3.854734 |
| 1  | 1.355673  | 3.085909  | -4.393697 |
| 1  | 1.570173  | 1.308614  | -4.283938 |
| 1  | -0.006339 | 2.048459  | -3.860110 |

Int2a

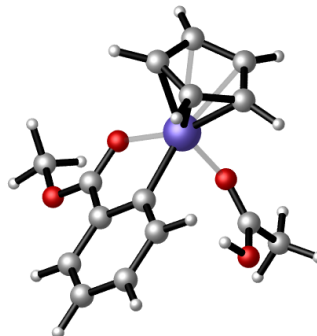

E = -991.246363 Hartrees

G = -991.009660 Hartrees

|    |           |           |           |
|----|-----------|-----------|-----------|
| 8  | -1.275119 | 0.796877  | 1.534742  |
| 6  | -1.764548 | 0.349627  | 0.399567  |
| 8  | -1.102160 | -0.285808 | -0.423656 |
| 6  | 1.841609  | 1.661627  | -0.439327 |
| 6  | 1.659419  | 0.587825  | 0.451685  |
| 6  | 2.320328  | 2.903176  | -0.016392 |
| 6  | 1.979317  | 0.791063  | 1.795772  |
| 6  | 2.627555  | 3.086290  | 1.326542  |
| 6  | 2.455149  | 2.034019  | 2.225157  |
| 1  | -0.314713 | 0.609466  | 1.579609  |
| 1  | 2.450077  | 3.710393  | -0.730613 |
| 1  | 1.860290  | -0.010095 | 2.521029  |
| 1  | 3.002966  | 4.043385  | 1.673553  |
| 1  | 2.697147  | 2.177629  | 3.274332  |
| 45 | 0.928736  | -1.087324 | -0.416331 |
| 6  | 2.497252  | -2.502056 | -0.698172 |
| 1  | 3.425266  | -2.256000 | -1.197501 |
| 6  | 1.354784  | -3.164977 | -1.311212 |
| 1  | 1.257468  | -3.400514 | -2.362710 |
| 6  | 0.379320  | -3.323809 | -0.337071 |
| 1  | -0.621695 | -3.706552 | -0.487316 |
| 6  | 2.239401  | -2.379605 | 0.697879  |
| 1  | 2.914391  | -1.967608 | 1.435334  |
| 6  | 0.886404  | -2.768495 | 0.910655  |
| 1  | 0.365228  | -2.771507 | 1.858859  |
| 6  | -3.199327 | 0.690123  | 0.178737  |
| 1  | -3.578817 | 0.168630  | -0.699297 |
| 1  | -3.784889 | 0.426251  | 1.063920  |
| 1  | -3.286170 | 1.771961  | 0.031443  |
| 8  | 1.114962  | 0.209121  | -2.139844 |
| 6  | 1.489809  | 1.353038  | -1.826551 |
| 8  | 1.583742  | 2.318497  | -2.702161 |
| 6  | 1.222033  | 2.019227  | -4.064623 |
| 1  | 1.348815  | 2.956578  | -4.603109 |
| 1  | 1.885789  | 1.251764  | -4.467350 |
| 1  | 0.183596  | 1.686117  | -4.112036 |

TS<sub>1-2j</sub>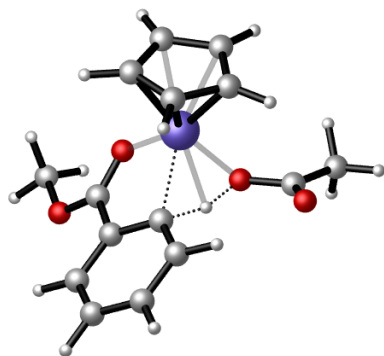

E = -991.191243 Hartrees

G = -990.957960 Hartrees

|    |           |           |           |
|----|-----------|-----------|-----------|
| 6  | 3.071380  | -4.298899 | 1.745085  |
| 1  | 4.138254  | -4.148911 | 1.840830  |
| 6  | 2.186616  | -3.563172 | 0.872818  |
| 1  | 2.488605  | -2.803090 | 0.164685  |
| 6  | 0.895627  | -4.098973 | 1.013375  |
| 1  | 0.022883  | -3.819055 | 0.437926  |
| 6  | 2.285692  | -5.231098 | 2.485618  |
| 1  | 2.658445  | -5.939088 | 3.213768  |
| 6  | 0.949751  | -5.161585 | 1.992599  |
| 1  | 0.115416  | -5.767306 | 2.320258  |
| 45 | 2.230931  | -5.718996 | 0.390055  |
| 6  | 1.988033  | -8.644855 | 0.054034  |
| 6  | 3.954470  | -8.248581 | 1.398888  |
| 6  | 1.954778  | -9.977318 | 0.443214  |
| 6  | 3.922801  | -9.584396 | 1.802956  |
| 1  | 4.748361  | -7.588870 | 1.734111  |
| 6  | 2.930695  | -10.43977 | 1.328036  |
| 1  | 1.181427  | -10.64487 | 0.077704  |
| 1  | 4.677422  | -9.961710 | 2.485935  |
| 1  | 2.914952  | -11.47785 | 1.644288  |
| 8  | 3.676789  | -5.968184 | -1.266550 |
| 8  | 5.576665  | -5.656487 | -0.102058 |
| 6  | 4.889760  | -5.427783 | -1.078372 |
| 6  | 5.298518  | -4.529869 | -2.215559 |
| 1  | 4.561489  | -3.728337 | -2.330958 |
| 1  | 6.285097  | -4.103250 | -2.028764 |
| 1  | 5.311487  | -5.099846 | -3.150021 |
| 6  | 2.987183  | -7.762588 | 0.517688  |
| 1  | 3.518201  | -6.956370 | -0.408932 |
| 8  | 0.906661  | -6.796432 | -0.950197 |
| 6  | 0.982775  | -8.031450 | -0.833598 |
| 8  | 0.192818  | -8.841339 | -1.478492 |
| 6  | -0.807167 | -8.252285 | -2.337690 |
| 1  | -0.322711 | -7.674461 | -3.126526 |
| 1  | -1.352034 | -9.095339 | -2.757361 |
| 1  | -1.470716 | -7.615610 | -1.749802 |

TS<sub>1-2k</sub>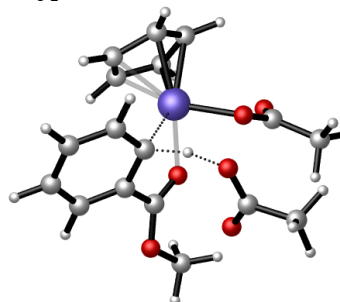

E = -1219.760091 Hartrees

G = -1219.483103 Hartrees

|    |           |           |           |
|----|-----------|-----------|-----------|
| 6  | 2.781472  | -4.277391 | 2.263082  |
| 1  | 3.777558  | -4.072619 | 2.631070  |
| 6  | 1.964956  | -3.395655 | 1.490145  |
| 1  | 2.262628  | -2.433656 | 1.097077  |
| 6  | 0.749573  | -4.069707 | 1.192145  |
| 1  | -0.045493 | -3.691635 | 0.565087  |
| 6  | 2.008985  | -5.470584 | 2.520964  |
| 1  | 2.355961  | -6.339401 | 3.063691  |
| 6  | 0.772155  | -5.350130 | 1.861462  |
| 1  | -0.001106 | -6.105185 | 1.813773  |
| 45 | 2.385471  | -5.186374 | 0.377493  |
| 6  | 2.563572  | -8.015851 | -0.282508 |
| 6  | 4.270354  | -7.646469 | 1.367393  |
| 6  | 2.301181  | -9.280393 | 0.232545  |
| 6  | 4.004429  | -8.901447 | 1.910132  |
| 1  | 5.061252  | -7.032808 | 1.790864  |
| 6  | 3.025983  | -9.717339 | 1.341261  |
| 1  | 1.530568  | -9.907709 | -0.204940 |
| 1  | 4.565622  | -9.253387 | 2.770890  |
| 1  | 2.825423  | -10.69750 | 1.763062  |
| 8  | 3.481578  | -4.255180 | -1.062663 |
| 6  | 2.865313  | -3.430238 | -1.853686 |
| 8  | 1.734988  | -2.976914 | -1.686491 |
| 6  | 3.692472  | -3.082442 | -3.078523 |
| 1  | 3.269043  | -2.219314 | -3.597040 |
| 1  | 4.733390  | -2.884052 | -2.808257 |
| 1  | 3.683948  | -3.947931 | -3.751153 |
| 8  | 5.339789  | -6.351056 | -1.461368 |
| 8  | 3.781093  | -6.853551 | -3.001836 |
| 6  | 4.910597  | -6.465642 | -2.661155 |
| 6  | 5.927359  | -6.077729 | -3.733055 |
| 1  | 6.176875  | -5.015312 | -3.633212 |
| 1  | 6.856769  | -6.641972 | -3.599509 |
| 1  | 5.530379  | -6.259564 | -4.735095 |
| 6  | 3.552974  | -7.168269 | 0.260497  |
| 1  | 4.249140  | -6.525550 | -0.547689 |
| 8  | 1.464564  | -6.200288 | -1.310934 |
| 6  | 1.747574  | -7.405631 | -1.353264 |
| 8  | 1.277041  | -8.208042 | -2.269580 |
| 6  | 0.568064  | -7.586877 | -3.355631 |
| 1  | 0.308714  | -8.398715 | -4.033368 |
| 1  | -0.333987 | -7.092876 | -2.987735 |
| 1  | 1.227206  | -6.868100 | -3.844609 |

Int3a

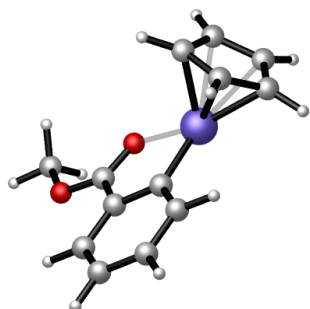

E = -762.203068 Hartrees

G = -762.022642 Hartrees

|    |           |           |           |
|----|-----------|-----------|-----------|
| 6  | 2.838701  | -4.294050 | 2.183149  |
| 1  | 3.855717  | -4.178106 | 2.535117  |
| 6  | 2.201904  | -3.470500 | 1.158643  |
| 1  | 2.698360  | -2.702937 | 0.579673  |
| 6  | 0.904579  | -3.918693 | 0.989507  |
| 1  | 0.191633  | -3.573596 | 0.252755  |
| 6  | 1.870613  | -5.175755 | 2.715813  |
| 1  | 2.009721  | -5.883155 | 3.521659  |
| 6  | 0.702353  | -5.052075 | 1.887323  |
| 1  | -0.221108 | -5.604225 | 2.004836  |
| 45 | 2.274604  | -5.747307 | 0.701653  |
| 6  | 2.206621  | -8.584975 | 0.180476  |
| 6  | 3.436901  | -8.154544 | 2.201343  |
| 6  | 2.441217  | -9.957165 | 0.290627  |
| 6  | 3.682767  | -9.525190 | 2.311884  |
| 1  | 3.834772  | -7.477687 | 2.951872  |
| 6  | 3.184524  | -10.42471 | 1.367935  |
| 1  | 2.054336  | -10.64290 | -0.456843 |
| 1  | 4.267958  | -9.896427 | 3.148575  |
| 1  | 3.378543  | -11.48715 | 1.473802  |
| 6  | 2.692393  | -7.665907 | 1.129184  |
| 8  | 1.376987  | -6.723796 | -0.999272 |
| 6  | 1.480243  | -7.965842 | -0.929944 |
| 8  | 0.959845  | -8.753253 | -1.829697 |
| 6  | 0.226038  | -8.142535 | -2.910548 |
| 1  | -0.149109 | -8.974311 | -3.503639 |
| 1  | -0.601103 | -7.552439 | -2.511565 |
| 1  | 0.890035  | -7.514286 | -3.506944 |

Int4a

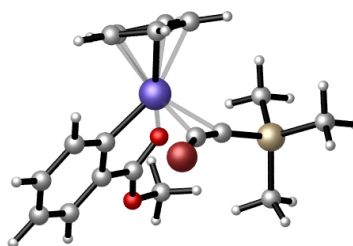

E = -1260.747432 Hartrees

G = -1260.454187 Hartrees

|    |           |           |           |
|----|-----------|-----------|-----------|
| 6  | 2.240562  | -3.249840 | 1.507444  |
| 1  | 3.186429  | -2.759984 | 1.317429  |
| 6  | 0.955016  | -2.838002 | 0.976430  |
| 1  | 0.799037  | -2.051823 | 0.250294  |
| 6  | -0.008749 | -3.706401 | 1.483491  |
| 1  | -1.057584 | -3.725163 | 1.217970  |
| 6  | 2.020569  | -4.305208 | 2.441948  |
| 1  | 2.778242  | -4.801717 | 3.032203  |
| 6  | 0.649019  | -4.663590 | 2.356844  |
| 1  | 0.158164  | -5.449235 | 2.915738  |
| 45 | 1.567761  | -4.987982 | 0.412598  |
| 6  | 2.640849  | -6.699373 | 0.618904  |
| 6  | 2.022597  | -7.831300 | 0.060434  |
| 6  | 3.873907  | -6.862110 | 1.245760  |
| 6  | 2.615708  | -9.097556 | 0.108816  |
| 6  | 4.464145  | -8.124326 | 1.303669  |
| 1  | 4.387800  | -6.013171 | 1.685959  |
| 6  | 3.844867  | -9.240095 | 0.734372  |
| 1  | 2.114398  | -9.951532 | -0.336073 |
| 1  | 5.424515  | -8.239236 | 1.798360  |
| 1  | 4.321655  | -10.21336 | 0.785363  |
| 6  | 1.897470  | -4.477464 | -1.760705 |
| 6  | 3.021617  | -4.667325 | -1.261083 |
| 35 | 4.846147  | -4.710254 | -1.292670 |
| 14 | 0.490315  | -4.120640 | -2.954583 |
| 6  | -1.104839 | -3.893818 | -2.004226 |
| 1  | -1.034596 | -3.064486 | -1.291619 |
| 1  | -1.916460 | -3.663452 | -2.705949 |
| 1  | -1.374267 | -4.801576 | -1.455661 |
| 6  | 0.993687  | -2.538483 | -3.826705 |
| 1  | 1.954834  | -2.653407 | -4.340623 |
| 1  | 0.241367  | -2.261364 | -4.575403 |
| 1  | 1.083272  | -1.707688 | -3.117065 |
| 6  | 0.429768  | -5.588632 | -4.120071 |
| 1  | 0.497039  | -6.535870 | -3.573952 |
| 1  | -0.506249 | -5.590912 | -4.691886 |
| 1  | 1.260457  | -5.557620 | -4.834704 |
| 8  | 0.237317  | -6.416152 | -0.476389 |
| 6  | 0.717895  | -7.566678 | -0.528436 |
| 8  | 0.071473  | -8.554879 | -1.084955 |
| 6  | -1.249404 | -8.283019 | -1.596358 |
| 1  | -1.208815 | -7.505319 | -2.360833 |
| 1  | -1.585504 | -9.224120 | -2.027429 |
| 1  | -1.908010 | -7.979958 | -0.779802 |

TS4-5a

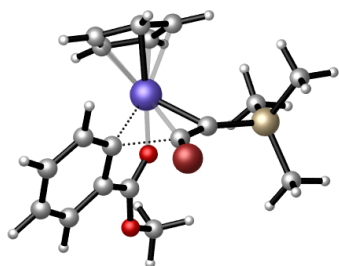

E = -1260.727359 Hartrees

G = -1260.436304 Hartrees

|    |           |           |           |
|----|-----------|-----------|-----------|
| 6  | 2.191843  | -3.259400 | 1.365127  |
| 1  | 3.154990  | -2.829941 | 1.121400  |
| 6  | 0.928849  | -2.864298 | 0.801011  |
| 1  | 0.786878  | -2.142310 | 0.008114  |
| 6  | -0.056449 | -3.689264 | 1.368644  |
| 1  | -1.107559 | -3.702524 | 1.112184  |
| 6  | 1.938945  | -4.223168 | 2.408074  |
| 1  | 2.690896  | -4.698290 | 3.023312  |
| 6  | 0.571360  | -4.526674 | 2.380766  |
| 1  | 0.061313  | -5.256640 | 2.995219  |
| 45 | 1.412834  | -5.008350 | 0.374498  |
| 6  | 2.738030  | -6.642108 | 0.273346  |
| 6  | 2.061079  | -7.855973 | 0.048239  |
| 6  | 3.994798  | -6.677952 | 0.884504  |
| 6  | 2.648295  | -9.082372 | 0.367179  |
| 6  | 4.557322  | -7.896730 | 1.243522  |
| 1  | 4.537704  | -5.755507 | 1.065084  |
| 6  | 3.899978  | -9.099181 | 0.966566  |
| 1  | 2.112040  | -10.00578 | 0.173804  |
| 1  | 5.526104  | -7.912701 | 1.733253  |
| 1  | 4.363398  | -10.04441 | 1.228831  |
| 6  | 1.640390  | -4.877270 | -1.691389 |
| 6  | 2.718232  | -5.467620 | -1.351766 |
| 35 | 4.423562  | -5.653480 | -2.101533 |
| 14 | 0.513057  | -4.046055 | -2.933670 |
| 6  | -1.191645 | -3.880966 | -2.174784 |
| 1  | -1.190663 | -3.150062 | -1.358336 |
| 1  | -1.911123 | -3.536886 | -2.928170 |
| 1  | -1.547058 | -4.838167 | -1.777817 |
| 6  | 1.271992  | -2.367307 | -3.286065 |
| 1  | 2.264231  | -2.469095 | -3.740518 |
| 1  | 0.640557  | -1.791876 | -3.974120 |
| 1  | 1.379610  | -1.783655 | -2.364073 |
| 6  | 0.503020  | -5.156181 | -4.444688 |
| 1  | 0.125521  | -6.155947 | -4.200510 |
| 1  | -0.142041 | -4.735974 | -5.226211 |
| 1  | 1.510163  | -5.267901 | -4.862965 |
| 8  | 0.088739  | -6.638665 | -0.314441 |
| 6  | 0.681906  | -7.724791 | -0.419662 |
| 8  | 0.116118  | -8.789929 | -0.923941 |
| 6  | -1.263506 | -8.676907 | -1.324800 |
| 1  | -1.362467 | -7.931225 | -2.115733 |
| 1  | -1.533900 | -9.664024 | -1.694908 |
| 1  | -1.882324 | -8.405358 | -0.466933 |

Int5a

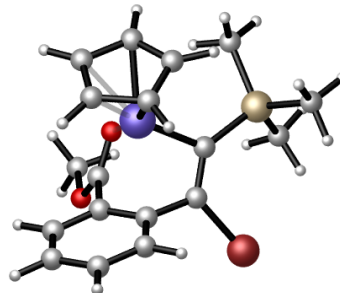

E = -1260.775909 Hartrees

G = -1260.483099 Hartrees

|    |           |           |           |
|----|-----------|-----------|-----------|
| 6  | 2.167892  | -3.735739 | 1.509968  |
| 1  | 3.210916  | -3.489355 | 1.360466  |
| 6  | 1.061674  | -3.138519 | 0.847260  |
| 1  | 1.103449  | -2.383721 | 0.073930  |
| 6  | -0.108959 | -3.814139 | 1.310727  |
| 1  | -1.120755 | -3.638139 | 0.969466  |
| 6  | 1.651127  | -4.643562 | 2.527641  |
| 1  | 2.261638  | -5.248726 | 3.185377  |
| 6  | 0.269078  | -4.685501 | 2.414345  |
| 1  | -0.407654 | -5.316495 | 2.974478  |
| 45 | 1.167645  | -5.240430 | 0.379525  |
| 6  | 2.929870  | -6.757717 | -0.578691 |
| 6  | 2.064479  | -7.729017 | -0.014779 |
| 6  | 4.211217  | -6.607334 | -0.014529 |
| 6  | 2.490986  | -8.534541 | 1.050310  |
| 6  | 4.613513  | -7.387542 | 1.055723  |
| 1  | 4.889567  | -5.876685 | -0.444129 |
| 6  | 3.756343  | -8.358853 | 1.584107  |
| 1  | 1.818606  | -9.283051 | 1.456828  |
| 1  | 5.603584  | -7.251824 | 1.478556  |
| 1  | 4.081282  | -8.978714 | 2.413199  |
| 6  | 1.552145  | -5.045308 | -1.622602 |
| 6  | 2.511988  | -5.947452 | -1.762811 |
| 35 | 3.478667  | -6.347041 | -3.401303 |
| 14 | 0.641736  | -3.921561 | -2.832548 |
| 6  | -1.026286 | -3.479077 | -2.084477 |
| 1  | -0.939520 | -2.748600 | -1.272823 |
| 1  | -1.673190 | -3.037526 | -2.853001 |
| 1  | -1.535410 | -4.368106 | -1.694066 |
| 6  | 1.687993  | -2.380348 | -3.089617 |
| 1  | 2.660727  | -2.632356 | -3.527998 |
| 1  | 1.185662  | -1.679963 | -3.768307 |
| 1  | 1.870697  | -1.855916 | -2.143884 |
| 6  | 0.341696  | -4.820865 | -4.457637 |
| 1  | -0.105062 | -5.808699 | -4.292511 |
| 1  | -0.355123 | -4.238066 | -5.073567 |
| 1  | 1.261533  | -4.959885 | -5.033490 |
| 8  | -0.115087 | -6.896898 | -0.415277 |
| 6  | 0.655286  | -7.859494 | -0.483789 |
| 8  | 0.306576  | -9.039158 | -0.906985 |
| 6  | -1.070489 | -9.213893 | -1.312621 |
| 1  | -1.289594 | -8.560037 | -2.158554 |
| 1  | -1.149415 | -10.25959 | -1.602166 |
| 1  | -1.734413 | -8.992274 | -0.475302 |



Int6a

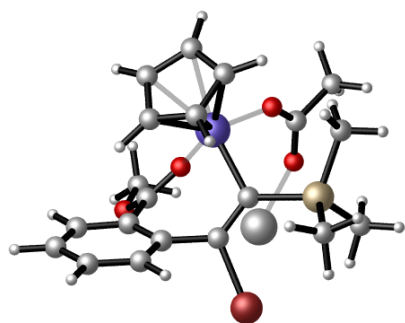

|   |           |           |          |
|---|-----------|-----------|----------|
| 8 | -1.183781 | -0.515958 | 3.722265 |
| 6 | 0.077091  | -0.491736 | 4.424633 |
| 1 | 0.652200  | 0.388178  | 4.128449 |
| 1 | -0.187630 | -0.439236 | 5.478747 |
| 1 | 0.641866  | -1.401020 | 4.211121 |

E = -1635.024754 Hartrees

G = -1634.686713 Hartrees

|    |           |           |           |
|----|-----------|-----------|-----------|
| 6  | -2.746980 | -0.076634 | 0.554040  |
| 6  | -4.616526 | -1.830320 | 1.731899  |
| 6  | -1.817601 | 0.849064  | -0.168987 |
| 6  | -0.662891 | 0.572661  | -0.805381 |
| 6  | -2.464798 | -0.726644 | 1.769522  |
| 1  | -3.166816 | -2.060859 | 3.301672  |
| 6  | -3.405029 | -1.578026 | 2.359794  |
| 6  | -3.981313 | -0.333371 | -0.051070 |
| 6  | -4.897559 | -1.210180 | 0.517126  |
| 1  | -5.333259 | -2.506624 | 2.185456  |
| 1  | -5.837865 | -1.401470 | 0.009966  |
| 1  | -4.225032 | 0.157946  | -0.987733 |
| 6  | 0.550541  | -2.483581 | -1.989539 |
| 6  | -0.857492 | -2.281856 | -1.863384 |
| 6  | 0.989157  | -3.313672 | -0.882486 |
| 1  | -1.493035 | -1.742105 | -2.552574 |
| 1  | 2.008514  | -3.628569 | -0.703836 |
| 6  | -1.246851 | -2.823157 | -0.608046 |
| 1  | -2.246915 | -2.825746 | -0.195861 |
| 6  | -0.098036 | -3.507759 | -0.038439 |
| 1  | -0.083763 | -4.007435 | 0.921501  |
| 1  | 1.170334  | -2.178608 | -2.820038 |
| 14 | 0.081408  | 1.586498  | -2.265140 |
| 35 | -2.715518 | 2.625702  | -0.407863 |
| 6  | 1.394021  | 0.600119  | -3.174155 |
| 1  | 0.947299  | -0.200377 | -3.773893 |
| 1  | 2.145839  | 0.171279  | -2.506170 |
| 1  | 1.899285  | 1.279178  | -3.873551 |
| 6  | -1.290566 | 1.915524  | -3.516893 |
| 1  | -1.875371 | 2.812092  | -3.293297 |
| 1  | -1.985852 | 1.069821  | -3.586819 |
| 1  | -0.835502 | 2.050575  | -4.506689 |
| 6  | 0.874446  | 3.193521  | -1.680921 |
| 1  | 1.182356  | 3.767382  | -2.565260 |
| 1  | 1.776509  | 3.004748  | -1.086164 |
| 1  | 0.198585  | 3.834421  | -1.101917 |
| 8  | 2.151936  | -0.367046 | -0.172027 |
| 6  | 2.798926  | 0.569789  | 0.387207  |
| 8  | 2.341469  | 1.493097  | 1.106339  |
| 47 | 0.163115  | 1.944486  | 1.158173  |
| 6  | 4.286893  | 0.586411  | 0.098893  |
| 1  | 4.444174  | 1.127923  | -0.841877 |
| 1  | 4.829850  | 1.108486  | 0.889507  |
| 1  | 4.677251  | -0.426161 | -0.024995 |
| 45 | 0.188477  | -1.238626 | -0.295455 |
| 8  | -0.064256 | -0.649414 | 1.810070  |
| 6  | -1.143147 | -0.621107 | 2.418956  |

TS<sub>6-7a</sub>

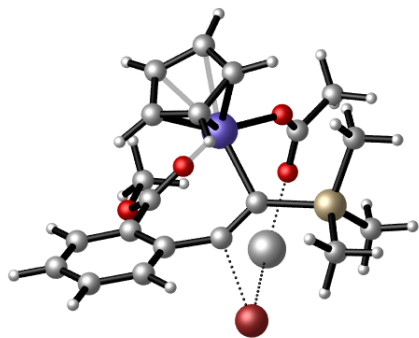

|   |           |           |          |
|---|-----------|-----------|----------|
| 6 | -1.109385 | -0.678698 | 2.333521 |
| 8 | -1.088070 | -0.530148 | 3.636256 |
| 6 | 0.208483  | -0.537029 | 4.269823 |
| 1 | 0.836499  | 0.249212  | 3.846639 |
| 1 | 0.009956  | -0.350386 | 5.323267 |
| 1 | 0.683372  | -1.510739 | 4.132631 |

E = -1635.019263 Hartrees

G = -1634.683017 Hartrees

|    |           |           |           |
|----|-----------|-----------|-----------|
| 6  | -2.726190 | -0.165673 | 0.486142  |
| 6  | -4.727484 | -1.577698 | 1.847561  |
| 6  | -1.724436 | 0.597177  | -0.266624 |
| 6  | -0.674132 | 0.472172  | -1.007875 |
| 6  | -2.466489 | -0.732962 | 1.747297  |
| 1  | -3.263243 | -1.855479 | 3.398593  |
| 6  | -3.473021 | -1.422674 | 2.426242  |
| 6  | -3.992870 | -0.325172 | -0.079945 |
| 6  | -4.982999 | -1.033305 | 0.591121  |
| 1  | -5.502404 | -2.122840 | 2.376034  |
| 1  | -5.958733 | -1.153880 | 0.131789  |
| 1  | -4.200409 | 0.123536  | -1.046078 |
| 6  | 0.627653  | -2.605240 | -2.090985 |
| 6  | -0.789366 | -2.523917 | -1.908722 |
| 6  | 1.183908  | -3.308436 | -0.956197 |
| 1  | -1.496478 | -2.071754 | -2.591243 |
| 1  | 2.234813  | -3.508953 | -0.796003 |
| 6  | -1.082629 | -3.041037 | -0.617943 |
| 1  | -2.060064 | -3.086031 | -0.156508 |
| 6  | 0.145961  | -3.564004 | -0.054436 |
| 1  | 0.247230  | -4.004354 | 0.928874  |
| 1  | 1.180289  | -2.285284 | -2.962328 |
| 14 | 0.089561  | 1.549550  | -2.382015 |
| 35 | -2.450391 | 2.786751  | 0.073464  |
| 6  | 1.307626  | 0.535734  | -3.382713 |
| 1  | 0.809713  | -0.276648 | -3.923432 |
| 1  | 2.096413  | 0.114532  | -2.751882 |
| 1  | 1.777252  | 1.186556  | -4.131549 |
| 6  | -1.346152 | 2.033191  | -3.494404 |
| 1  | -2.061634 | 2.685033  | -2.982899 |
| 1  | -1.884758 | 1.144334  | -3.844998 |
| 1  | -0.971413 | 2.565704  | -4.377678 |
| 6  | 0.973281  | 3.071728  | -1.720439 |
| 1  | 1.440526  | 3.583339  | -2.572674 |
| 1  | 1.773190  | 2.823662  | -1.013990 |
| 1  | 0.292597  | 3.788997  | -1.248280 |
| 8  | 2.051397  | -0.268099 | -0.266658 |
| 6  | 2.566472  | 0.600754  | 0.506868  |
| 8  | 1.976051  | 1.398750  | 1.272409  |
| 47 | -0.045753 | 2.303804  | 1.246121  |
| 6  | 4.078724  | 0.689549  | 0.431477  |
| 1  | 4.347173  | 1.270880  | -0.458769 |
| 1  | 4.482938  | 1.194502  | 1.310821  |
| 1  | 4.522960  | -0.303414 | 0.327169  |
| 45 | 0.220268  | -1.342842 | -0.423928 |
| 8  | -0.064441 | -0.775548 | 1.685148  |

Int7a

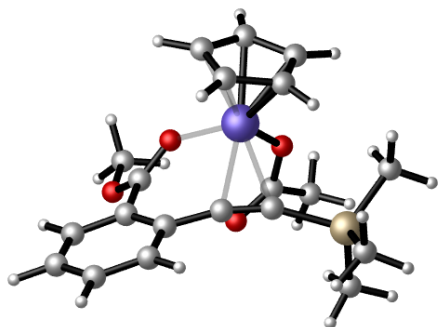

|   |          |           |          |
|---|----------|-----------|----------|
| 1 | 1.475591 | -0.472199 | 3.457972 |
| 1 | 0.712355 | -0.594000 | 5.078006 |
| 1 | 0.888276 | -2.057976 | 4.057977 |

E = -1476.006275 Hartrees

G = -1475.663590 Hartrees

|    |           |           |           |
|----|-----------|-----------|-----------|
| 6  | -2.498453 | -0.346424 | 0.514935  |
| 6  | -4.551793 | -0.516666 | 2.405076  |
| 6  | -1.482439 | -0.162611 | -0.482032 |
| 6  | -0.782491 | 0.213711  | -1.427313 |
| 6  | -2.201628 | -0.667629 | 1.853188  |
| 1  | -3.005199 | -0.978737 | 3.821812  |
| 6  | -3.234255 | -0.737483 | 2.790130  |
| 6  | -3.827705 | -0.117527 | 0.140111  |
| 6  | -4.847401 | -0.209756 | 1.079744  |
| 1  | -5.345042 | -0.585009 | 3.142061  |
| 1  | -5.874238 | -0.034850 | 0.775420  |
| 1  | -4.048359 | 0.138724  | -0.890765 |
| 6  | 1.415474  | -2.807652 | -1.980161 |
| 6  | 0.086268  | -2.608871 | -2.451502 |
| 6  | 1.341787  | -3.535279 | -0.754208 |
| 1  | -0.197536 | -2.061928 | -3.339944 |
| 1  | 2.175330  | -3.832668 | -0.132451 |
| 6  | -0.820511 | -3.275086 | -1.552121 |
| 1  | -1.898359 | -3.297150 | -1.634034 |
| 6  | -0.045017 | -3.845137 | -0.519305 |
| 1  | -0.434324 | -4.350323 | 0.355509  |
| 1  | 2.310498  | -2.393224 | -2.424367 |
| 14 | 0.008036  | 1.298895  | -2.744331 |
| 6  | 1.597295  | 0.521752  | -3.353526 |
| 1  | 1.410983  | -0.381141 | -3.946125 |
| 1  | 2.248903  | 0.263719  | -2.512384 |
| 1  | 2.128530  | 1.234758  | -3.996215 |
| 6  | -1.269894 | 1.434721  | -4.110215 |
| 1  | -2.224391 | 1.813813  | -3.727073 |
| 1  | -1.453558 | 0.465966  | -4.589255 |
| 1  | -0.920188 | 2.129864  | -4.883725 |
| 6  | 0.299661  | 2.947541  | -1.900801 |
| 1  | 0.911383  | 3.600741  | -2.535132 |
| 1  | 0.809482  | 2.825772  | -0.939432 |
| 1  | -0.652377 | 3.456217  | -1.709040 |
| 8  | 1.821933  | -0.369149 | -0.162291 |
| 6  | 1.748167  | 0.682674  | 0.606731  |
| 8  | 0.771659  | 1.051138  | 1.252661  |
| 6  | 3.045269  | 1.473272  | 0.609997  |
| 1  | 3.899691  | 0.814568  | 0.791361  |
| 1  | 3.188244  | 1.938162  | -0.372158 |
| 1  | 3.008854  | 2.253516  | 1.372751  |
| 45 | 0.283576  | -1.682212 | -0.513106 |
| 8  | 0.017776  | -1.600410 | 1.621738  |
| 6  | -0.825141 | -0.997087 | 2.292905  |
| 8  | -0.588115 | -0.678982 | 3.538238  |
| 6  | 0.720085  | -0.979176 | 4.059897  |

Int8a

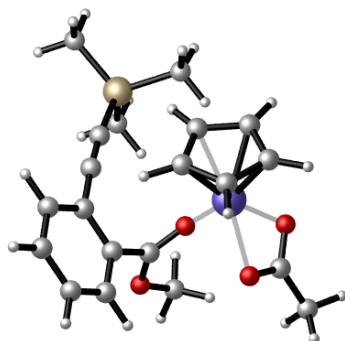

|   |          |           |           |
|---|----------|-----------|-----------|
| 6 | 2.566385 | -7.807893 | -3.713857 |
| 1 | 2.426290 | -8.653073 | -4.384615 |
| 1 | 3.410814 | -7.195728 | -4.035095 |
| 1 | 2.713057 | -8.146530 | -2.686476 |

E = -1476.005955 Hartrees

G = -1475.666163 Hartrees

|    |           |           |           |
|----|-----------|-----------|-----------|
| 6  | 2.662110  | -2.903660 | 0.478349  |
| 1  | 3.727460  | -2.740827 | 0.577236  |
| 6  | 1.879378  | -2.606592 | -0.662418 |
| 1  | 2.237129  | -2.174439 | -1.586892 |
| 6  | 0.536612  | -3.055453 | -0.416408 |
| 1  | -0.296872 | -2.985822 | -1.101424 |
| 6  | 1.818857  | -3.566494 | 1.437951  |
| 1  | 2.124541  | -3.943162 | 2.404794  |
| 6  | 0.499541  | -3.620354 | 0.887150  |
| 1  | -0.355782 | -4.100502 | 1.344714  |
| 45 | 1.872871  | -4.750385 | -0.311588 |
| 8  | 3.363750  | -6.226628 | 0.130077  |
| 8  | 1.256667  | -6.754254 | 0.105384  |
| 6  | 2.470041  | -7.123300 | 0.229359  |
| 6  | 2.820698  | -8.557289 | 0.451528  |
| 1  | 2.025699  | -9.059534 | 1.006769  |
| 1  | 2.926604  | -9.051501 | -0.520935 |
| 1  | 3.769900  | -8.638776 | 0.984959  |
| 6  | -0.080721 | -5.304554 | -3.171138 |
| 6  | -1.252357 | -5.962692 | -2.808800 |
| 6  | -0.117220 | -3.981346 | -3.653094 |
| 6  | -2.472128 | -5.296721 | -2.892357 |
| 1  | -1.207699 | -6.985146 | -2.446750 |
| 6  | -1.354452 | -3.334769 | -3.754921 |
| 6  | -2.520390 | -3.987869 | -3.367208 |
| 1  | -3.383911 | -5.804780 | -2.595873 |
| 1  | -1.392609 | -2.320812 | -4.139106 |
| 1  | -3.472769 | -3.473207 | -3.444224 |
| 6  | 1.099897  | -3.329779 | -4.030693 |
| 6  | 2.179350  | -2.846820 | -4.316823 |
| 14 | 3.905172  | -2.276703 | -4.677646 |
| 6  | 4.796024  | -2.130876 | -3.028851 |
| 1  | 5.853718  | -1.889291 | -3.192557 |
| 1  | 4.368236  | -1.341653 | -2.399632 |
| 1  | 4.753171  | -3.076112 | -2.473968 |
| 6  | 4.705238  | -3.600870 | -5.740603 |
| 1  | 4.175651  | -3.727111 | -6.691887 |
| 1  | 5.745772  | -3.336928 | -5.967200 |
| 1  | 4.711816  | -4.568266 | -5.224861 |
| 6  | 3.831412  | -0.629836 | -5.572084 |
| 1  | 3.313278  | 0.130916  | -4.976775 |
| 1  | 4.844543  | -0.261951 | -5.776289 |
| 1  | 3.309671  | -0.723206 | -6.531606 |
| 8  | 2.141611  | -5.642235 | -2.290806 |
| 6  | 1.228455  | -5.998895 | -3.039380 |
| 8  | 1.343966  | -7.046484 | -3.810877 |

3ab

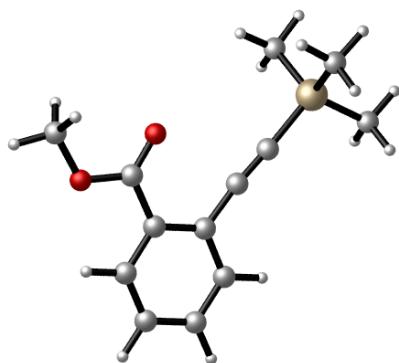

E = -944.731447 Hartrees

G = -944.521070 Hartrees

|    |           |           |           |
|----|-----------|-----------|-----------|
| 6  | 1.166194  | -0.609356 | -0.332398 |
| 6  | 2.550197  | -0.517564 | -0.270328 |
| 6  | 3.188182  | 0.728417  | -0.162091 |
| 6  | 2.399130  | 1.898831  | -0.118418 |
| 6  | 1.007032  | 1.787024  | -0.186178 |
| 6  | 0.390441  | 0.546572  | -0.291058 |
| 1  | 0.694893  | -1.583741 | -0.415677 |
| 1  | 3.159513  | -1.414945 | -0.306910 |
| 1  | 0.404526  | 2.686934  | -0.152564 |
| 1  | -0.692005 | 0.483257  | -0.340382 |
| 6  | 4.621261  | 0.719244  | -0.121613 |
| 6  | 5.830505  | 0.580665  | -0.109802 |
| 14 | 7.672042  | 0.451426  | -0.092168 |
| 6  | 8.342390  | 1.488303  | -1.508135 |
| 1  | 8.036757  | 2.536726  | -1.412422 |
| 1  | 9.439235  | 1.457590  | -1.520833 |
| 1  | 7.984992  | 1.119380  | -2.476806 |
| 6  | 8.294262  | 1.096297  | 1.558993  |
| 1  | 7.852940  | 0.543907  | 2.396800  |
| 1  | 9.384260  | 0.987871  | 1.623692  |
| 1  | 8.053953  | 2.157660  | 1.690845  |
| 6  | 8.139103  | -1.355148 | -0.312859 |
| 1  | 7.760314  | -1.754514 | -1.261180 |
| 1  | 9.230106  | -1.472862 | -0.312789 |
| 1  | 7.735901  | -1.973240 | 0.497997  |
| 6  | 3.029739  | 3.246317  | 0.013731  |
| 8  | 4.204121  | 3.449846  | 0.232766  |
| 8  | 2.135813  | 4.231764  | -0.134224 |
| 6  | 2.646427  | 5.560144  | 0.001718  |
| 1  | 3.401657  | 5.761998  | -0.762136 |
| 1  | 1.788790  | 6.218602  | -0.134340 |
| 1  | 3.082516  | 5.706676  | 0.993226  |

Int9a

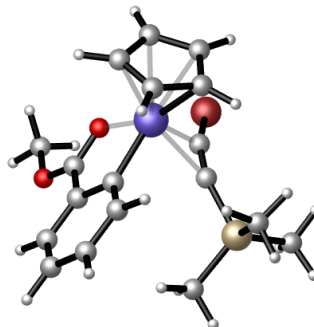

E = -1260.745639 Hartrees

G = -1260.454738 Hartrees

|    |           |           |           |
|----|-----------|-----------|-----------|
| 45 | 0.518141  | 1.216712  | 0.114761  |
| 6  | 0.080638  | 3.123635  | -0.456080 |
| 6  | 0.431569  | 4.316008  | 0.174919  |
| 6  | -0.613235 | 3.202382  | -1.674937 |
| 6  | 0.086476  | 5.539821  | -0.399049 |
| 1  | 0.970200  | 4.312121  | 1.116030  |
| 6  | -0.979382 | 4.426458  | -2.244615 |
| 6  | -0.626458 | 5.601540  | -1.598729 |
| 1  | 0.372731  | 6.459540  | 0.103361  |
| 1  | -1.520650 | 4.447653  | -3.185371 |
| 1  | -0.893380 | 6.561674  | -2.027746 |
| 6  | 1.812253  | 0.981250  | 1.838610  |
| 1  | 1.520781  | 1.284832  | 2.835373  |
| 6  | 2.495963  | 1.788648  | 0.883218  |
| 6  | 1.693759  | -0.356249 | 1.295233  |
| 1  | 2.767864  | 2.827274  | 1.005961  |
| 6  | 2.646638  | 1.016008  | -0.299186 |
| 1  | 1.239890  | -1.200043 | 1.797032  |
| 6  | 2.184490  | -0.329905 | -0.011990 |
| 1  | 3.104177  | 1.344194  | -1.222881 |
| 1  | 2.168337  | -1.149056 | -0.719396 |
| 35 | -1.967092 | -1.318770 | 0.233981  |
| 6  | -1.381745 | 0.335674  | 0.734571  |
| 6  | -1.440478 | 1.448403  | 1.291578  |
| 14 | -2.143308 | 2.762518  | 2.432671  |
| 6  | -3.442660 | 1.817390  | 3.402219  |
| 1  | -3.927311 | 2.475920  | 4.133680  |
| 1  | -4.220217 | 1.419599  | 2.739818  |
| 1  | -2.998953 | 0.976440  | 3.947570  |
| 6  | -2.933568 | 4.108275  | 1.399668  |
| 1  | -3.530426 | 4.763646  | 2.046656  |
| 1  | -2.196645 | 4.725990  | 0.878611  |
| 1  | -3.608731 | 3.676674  | 0.651493  |
| 6  | -0.777734 | 3.362581  | 3.565403  |
| 1  | -0.435995 | 2.551494  | 4.219034  |
| 1  | 0.086629  | 3.753831  | 3.020974  |
| 1  | -1.156051 | 4.165705  | 4.210065  |
| 8  | -0.402888 | 0.871212  | -1.789842 |
| 6  | -0.853197 | 1.913134  | -2.307938 |
| 8  | -1.524645 | 1.890712  | -3.426818 |
| 6  | -1.733855 | 0.609561  | -4.053605 |
| 1  | -2.334398 | -0.029281 | -3.403386 |
| 1  | -2.270346 | 0.827782  | -4.975060 |
| 1  | -0.774287 | 0.136836  | -4.270640 |

TS9-10a

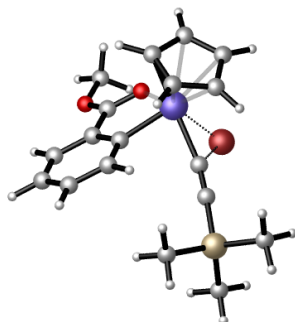

E = -1260.677441 Hartrees

G = -1260.390234 Hartrees

|    |           |           |           |
|----|-----------|-----------|-----------|
| 45 | 0.525555  | 1.037719  | -0.345019 |
| 6  | -0.231079 | 2.838329  | -0.971503 |
| 6  | -0.292806 | 4.020917  | -0.247378 |
| 6  | -0.668974 | 2.828145  | -2.302753 |
| 6  | -0.786235 | 5.172575  | -0.858894 |
| 1  | 0.014385  | 4.053429  | 0.791650  |
| 6  | -1.181689 | 3.979815  | -2.910824 |
| 6  | -1.235363 | 5.156966  | -2.182078 |
| 1  | -0.827709 | 6.096126  | -0.288584 |
| 1  | -1.524801 | 3.940343  | -3.939933 |
| 1  | -1.626358 | 6.061451  | -2.635737 |
| 6  | 1.877732  | 0.792969  | 1.376612  |
| 1  | 1.499303  | 0.744307  | 2.388825  |
| 6  | 2.204354  | 1.990729  | 0.669047  |
| 6  | 2.213334  | -0.341575 | 0.549515  |
| 1  | 2.108421  | 2.998536  | 1.046877  |
| 6  | 2.588091  | 1.605591  | -0.645338 |
| 1  | 2.081712  | -1.380516 | 0.818892  |
| 6  | 2.625772  | 0.151297  | -0.688232 |
| 1  | 2.880811  | 2.269765  | -1.447798 |
| 1  | 2.868059  | -0.437569 | -1.563851 |
| 35 | -1.397259 | -0.581995 | 0.158504  |
| 6  | -0.921254 | 1.357057  | 1.120405  |
| 6  | -1.412944 | 1.968782  | 2.061390  |
| 14 | -2.150923 | 2.965290  | 3.426155  |
| 6  | -4.015088 | 2.746308  | 3.371891  |
| 1  | -4.494503 | 3.339016  | 4.161055  |
| 1  | -4.425632 | 3.074176  | 2.409595  |
| 1  | -4.297470 | 1.697648  | 3.520310  |
| 6  | -1.698338 | 4.771223  | 3.163078  |
| 1  | -2.143083 | 5.389008  | 3.953745  |
| 1  | -0.613439 | 4.927972  | 3.190540  |
| 1  | -2.072859 | 5.142119  | 2.201768  |
| 6  | -1.444382 | 2.338139  | 5.050024  |
| 1  | -1.655008 | 1.272090  | 5.194490  |
| 1  | -0.357752 | 2.478339  | 5.095064  |
| 1  | -1.885351 | 2.883452  | 5.893747  |
| 8  | -0.006419 | 0.588633  | -2.360168 |
| 6  | -0.524635 | 1.547659  | -2.973323 |
| 8  | -0.934701 | 1.434574  | -4.201831 |
| 6  | -0.779207 | 0.150727  | -4.846299 |
| 1  | -1.322973 | -0.613695 | -4.288786 |
| 1  | -1.206825 | 0.280340  | -5.838308 |
| 1  | 0.280327  | -0.102673 | -4.912815 |

Int10a

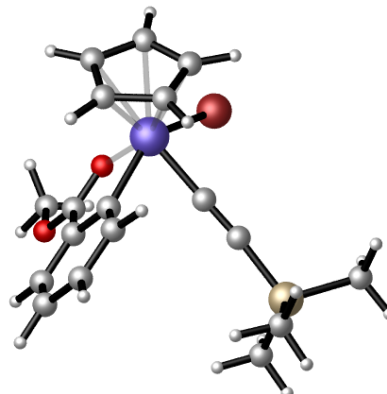

E = -1260.696418 Hartrees

G = -1260.407151 Hartrees

|    |           |           |           |
|----|-----------|-----------|-----------|
| 45 | 0.953735  | 1.062989  | -0.162649 |
| 6  | 0.208819  | 2.917377  | -0.836447 |
| 6  | 0.499015  | 4.184096  | -0.351818 |
| 6  | -0.671798 | 2.764406  | -1.910864 |
| 6  | -0.090554 | 5.289162  | -0.962339 |
| 1  | 1.154328  | 4.335567  | 0.497097  |
| 6  | -1.269120 | 3.878243  | -2.511554 |
| 6  | -0.973432 | 5.144165  | -2.034817 |
| 1  | 0.138448  | 6.279846  | -0.581662 |
| 1  | -1.960299 | 3.735600  | -3.336037 |
| 1  | -1.428630 | 6.017796  | -2.488264 |
| 6  | 2.728339  | 0.621059  | 1.023005  |
| 1  | 2.649227  | 0.173233  | 2.003955  |
| 6  | 2.689418  | 2.006556  | 0.737616  |
| 6  | 2.933044  | -0.087156 | -0.232145 |
| 1  | 2.571357  | 2.797110  | 1.465665  |
| 6  | 2.844044  | 2.156496  | -0.688210 |
| 1  | 3.001257  | -1.160103 | -0.344203 |
| 6  | 3.020495  | 0.860620  | -1.262331 |
| 1  | 2.876971  | 3.092256  | -1.227890 |
| 1  | 3.126051  | 0.649133  | -2.318081 |
| 35 | 0.138895  | -1.185185 | 0.766693  |
| 6  | -0.384850 | 1.745123  | 1.122467  |
| 6  | -1.176175 | 2.182249  | 1.942750  |
| 14 | -2.399999 | 2.953504  | 3.084548  |
| 6  | -4.065377 | 2.971354  | 2.213603  |
| 1  | -4.829188 | 3.438962  | 2.847410  |
| 1  | -4.016262 | 3.534536  | 1.274116  |
| 1  | -4.401057 | 1.954286  | 1.979125  |
| 6  | -1.819267 | 4.708789  | 3.430836  |
| 1  | -2.541664 | 5.241754  | 4.061491  |
| 1  | -0.853620 | 4.715336  | 3.950187  |
| 1  | -1.705505 | 5.274980  | 2.498424  |
| 6  | -2.488138 | 1.951923  | 4.670492  |
| 1  | -2.785110 | 0.916189  | 4.467440  |
| 1  | -1.519332 | 1.928508  | 5.183369  |
| 1  | -3.222769 | 2.382537  | 5.362342  |
| 8  | -0.325338 | 0.462909  | -1.726249 |
| 6  | -0.922066 | 1.392540  | -2.311726 |
| 8  | -1.764176 | 1.167410  | -3.272839 |
| 6  | -2.014452 | -0.209271 | -3.640005 |
| 1  | -2.394538 | -0.756948 | -2.776385 |
| 1  | -2.764776 | -0.158339 | -4.426105 |
| 1  | -1.095157 | -0.664859 | -4.011084 |

TS<sub>4-12a</sub>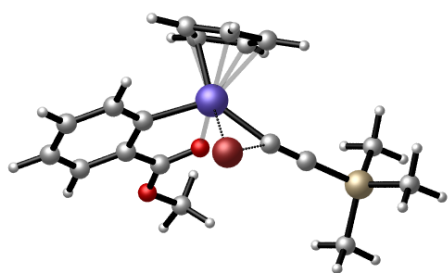

E = -1260.675950 Hartrees

G = -1260.387830 Hartrees

|    |           |           |           |
|----|-----------|-----------|-----------|
| 45 | 0.576612  | 0.861971  | -1.125680 |
| 6  | 0.826720  | 2.813687  | -0.556042 |
| 6  | 2.019794  | 3.405375  | -0.166547 |
| 6  | -0.352481 | 3.567098  | -0.565240 |
| 6  | 2.021000  | 4.753779  | 0.193492  |
| 1  | 2.944184  | 2.837724  | -0.132174 |
| 6  | -0.350948 | 4.915735  | -0.196076 |
| 6  | 0.846256  | 5.508645  | 0.176932  |
| 1  | 2.955214  | 5.219674  | 0.492740  |
| 1  | -1.278584 | 5.479240  | -0.199299 |
| 1  | 0.868930  | 6.555084  | 0.462059  |
| 6  | -0.388820 | -0.584761 | -0.015265 |
| 6  | -1.229429 | -1.467632 | 0.095283  |
| 14 | -2.537481 | -2.766336 | 0.147381  |
| 6  | -2.998012 | -3.202706 | -1.621881 |
| 1  | -3.776002 | -3.976261 | -1.636262 |
| 1  | -2.133509 | -3.587500 | -2.175788 |
| 1  | -3.383897 | -2.328154 | -2.158884 |
| 6  | -4.017576 | -2.055568 | 1.058932  |
| 1  | -4.396056 | -1.154980 | 0.561428  |
| 1  | -3.762830 | -1.790875 | 2.091791  |
| 1  | -4.832670 | -2.789103 | 1.091624  |
| 6  | -1.848638 | -4.270384 | 1.036418  |
| 1  | -0.953623 | -4.656343 | 0.534702  |
| 1  | -2.594681 | -5.074484 | 1.055975  |
| 1  | -1.581240 | -4.035282 | 2.073193  |
| 35 | 1.059648  | 0.411894  | 1.360054  |
| 6  | 2.446995  | -0.058088 | -1.865395 |
| 1  | 3.264639  | -0.326299 | -1.208717 |
| 6  | 2.279762  | 1.196469  | -2.517606 |
| 6  | 1.399445  | -0.950423 | -2.313856 |
| 1  | 2.926908  | 2.056677  | -2.423653 |
| 6  | 1.046698  | 1.140366  | -3.224133 |
| 1  | 1.268571  | -1.974435 | -1.993444 |
| 6  | 0.535248  | -0.217234 | -3.130899 |
| 1  | 0.602610  | 1.944115  | -3.797196 |
| 1  | -0.396138 | -0.566040 | -3.556733 |
| 8  | -1.436430 | 1.606097  | -1.235698 |
| 6  | -1.539596 | 2.816246  | -0.946127 |
| 8  | -2.684364 | 3.433809  | -0.965299 |
| 6  | -3.856808 | 2.661205  | -1.305074 |
| 1  | -4.680629 | 3.370768  | -1.266096 |
| 1  | -3.751222 | 2.246037  | -2.308707 |
| 1  | -3.996877 | 1.863269  | -0.573864 |

Int12a

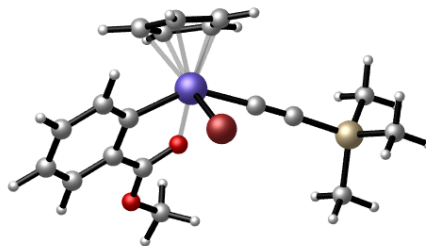

E = -1260.690983 Hartrees

G = -1260.402271 Hartrees

|    |           |           |           |
|----|-----------|-----------|-----------|
| 45 | 0.476825  | 0.838448  | -1.116341 |
| 6  | 0.927616  | 2.815331  | -0.514104 |
| 6  | 2.166052  | 3.341768  | -0.178910 |
| 6  | -0.210690 | 3.623304  | -0.454933 |
| 6  | 2.250926  | 4.681394  | 0.197588  |
| 1  | 3.067677  | 2.740899  | -0.196398 |
| 6  | -0.121522 | 4.965782  | -0.067513 |
| 6  | 1.117094  | 5.495203  | 0.252361  |
| 1  | 3.222615  | 5.092985  | 0.453247  |
| 1  | -1.021864 | 5.569873  | -0.018715 |
| 1  | 1.206209  | 6.534175  | 0.550665  |
| 6  | -0.697180 | -0.720441 | -0.658023 |
| 6  | -1.478818 | -1.632983 | -0.447813 |
| 14 | -2.690567 | -2.969367 | -0.057980 |
| 6  | -3.071409 | -3.910107 | -1.640634 |
| 1  | -3.791801 | -4.714114 | -1.444395 |
| 1  | -2.168583 | -4.367470 | -2.062598 |
| 1  | -3.505129 | -3.251327 | -2.402371 |
| 6  | -4.245237 | -2.158294 | 0.616752  |
| 1  | -4.675881 | -1.457708 | -0.108760 |
| 1  | -4.036554 | -1.602730 | 1.538608  |
| 1  | -5.006165 | -2.914843 | 0.845677  |
| 6  | -1.922817 | -4.113098 | 1.219127  |
| 1  | -1.015893 | -4.591829 | 0.831138  |
| 1  | -2.627578 | -4.906604 | 1.497113  |
| 1  | -1.652295 | -3.568926 | 2.131555  |
| 35 | 1.026809  | 0.525459  | 1.335060  |
| 6  | 2.491992  | 0.539736  | -1.889102 |
| 1  | 3.366211  | 0.672720  | -1.266453 |
| 6  | 1.890582  | 1.530777  | -2.734931 |
| 6  | 1.748396  | -0.670636 | -2.028667 |
| 1  | 2.235109  | 2.544386  | -2.881218 |
| 6  | 0.765869  | 0.933710  | -3.374291 |
| 1  | 1.952674  | -1.605515 | -1.524685 |
| 6  | 0.678880  | -0.422283 | -2.959396 |
| 1  | 0.072450  | 1.438321  | -4.034647 |
| 1  | -0.071495 | -1.134894 | -3.270515 |
| 8  | -1.445652 | 1.744324  | -1.086761 |
| 6  | -1.457867 | 2.954910  | -0.774845 |
| 8  | -2.562149 | 3.635661  | -0.726390 |
| 6  | -3.794691 | 2.941694  | -1.028123 |
| 1  | -4.574601 | 3.690441  | -0.906343 |
| 1  | -3.768971 | 2.573992  | -2.055162 |
| 1  | -3.934682 | 2.116750  | -0.327906 |

Int13a

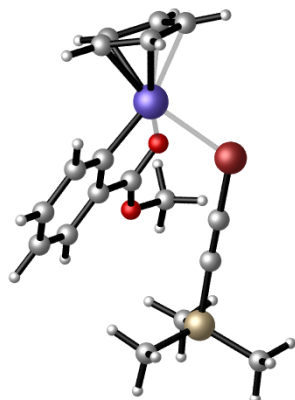

E = -1260.725162 Hartrees

G = -1260.439357 Hartrees

|    |           |           |           |
|----|-----------|-----------|-----------|
| 6  | -0.099662 | -3.560439 | 2.794017  |
| 1  | 0.487767  | -2.728796 | 3.161849  |
| 6  | -1.110024 | -3.485491 | 1.741570  |
| 1  | -1.340250 | -2.605101 | 1.155315  |
| 6  | -1.650165 | -4.751334 | 1.573928  |
| 1  | -2.367732 | -5.051677 | 0.822261  |
| 6  | -0.119216 | -4.868172 | 3.337929  |
| 1  | 0.484041  | -5.234397 | 4.157053  |
| 6  | -0.985353 | -5.652442 | 2.508467  |
| 1  | -1.204147 | -6.704902 | 2.633485  |
| 45 | 0.612318  | -4.961751 | 1.314742  |
| 6  | 2.267401  | -6.005930 | 1.806754  |
| 6  | 2.562802  | -7.060408 | 0.926495  |
| 6  | 3.120382  | -5.783943 | 2.885310  |
| 6  | 3.671992  | -7.890486 | 1.109555  |
| 6  | 4.232593  | -6.606617 | 3.070778  |
| 1  | 2.929900  | -4.973096 | 3.582328  |
| 6  | 4.506594  | -7.660224 | 2.195021  |
| 1  | 3.876842  | -8.693989 | 0.408416  |
| 1  | 4.895025  | -6.424690 | 3.912443  |
| 1  | 5.373359  | -8.292198 | 2.359147  |
| 6  | 3.257969  | -4.396265 | -1.080292 |
| 6  | 4.037317  | -5.143209 | -1.636805 |
| 14 | 5.320243  | -6.205067 | -2.478924 |
| 35 | 2.117675  | -3.279506 | -0.234502 |
| 6  | 6.561096  | -6.704870 | -1.167202 |
| 1  | 6.077046  | -7.243072 | -0.344597 |
| 1  | 7.325890  | -7.362289 | -1.598762 |
| 1  | 7.067821  | -5.829656 | -0.744737 |
| 6  | 4.463765  | -7.695644 | -3.224372 |
| 1  | 4.045208  | -8.349450 | -2.452510 |
| 1  | 3.657857  | -7.399493 | -3.905216 |
| 1  | 5.188792  | -8.281403 | -3.803434 |
| 6  | 6.104914  | -5.137625 | -3.805355 |
| 1  | 5.366594  | -4.807680 | -4.545039 |
| 1  | 6.576944  | -4.246777 | -3.375663 |
| 1  | 6.880329  | -5.705275 | -4.334684 |
| 8  | 0.707152  | -6.336761 | -0.316867 |
| 6  | 1.658216  | -7.139888 | -0.216734 |
| 8  | 1.886458  | -8.049375 | -1.122728 |
| 6  | 1.051925  | -8.041220 | -2.297936 |
| 1  | 1.434891  | -8.843030 | -2.925925 |
| 1  | 0.013514  | -8.232519 | -2.020939 |
| 1  | 1.139524  | -7.078239 | -2.804178 |

TS<sub>13-14a</sub>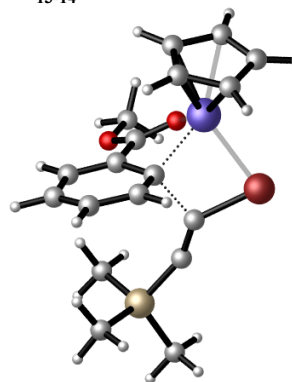

E = -1260.657483 Hartrees

G = -1260.369805 Hartrees

|    |           |           |           |
|----|-----------|-----------|-----------|
| 6  | 0.257636  | -3.696145 | 2.755015  |
| 1  | 0.881947  | -2.873212 | 3.076950  |
| 6  | -0.938666 | -3.586329 | 1.942370  |
| 1  | -1.311552 | -2.675752 | 1.491921  |
| 6  | -1.460567 | -4.871168 | 1.758160  |
| 1  | -2.307602 | -5.136054 | 1.139302  |
| 6  | 0.398112  | -5.060990 | 3.144301  |
| 1  | 1.188488  | -5.470080 | 3.759053  |
| 6  | -0.603081 | -5.807001 | 2.459784  |
| 1  | -0.743185 | -6.878877 | 2.507855  |
| 45 | 0.643579  | -4.853988 | 0.999785  |
| 6  | 2.597243  | -5.667392 | 0.881123  |
| 6  | 2.391242  | -7.022290 | 0.465824  |
| 6  | 3.524021  | -5.444459 | 1.933556  |
| 6  | 3.190394  | -8.054683 | 0.919867  |
| 6  | 4.305567  | -6.484634 | 2.408632  |
| 1  | 3.660885  | -4.437716 | 2.317598  |
| 6  | 4.167045  | -7.774540 | 1.881659  |
| 1  | 3.048975  | -9.067854 | 0.557195  |
| 1  | 5.039936  | -6.300140 | 3.186389  |
| 1  | 4.801987  | -8.575381 | 2.246559  |
| 6  | 3.141597  | -4.699198 | -0.552689 |
| 6  | 4.074851  | -4.980450 | -1.332313 |
| 14 | 5.431662  | -5.988423 | -2.056996 |
| 35 | 1.821957  | -3.224272 | -0.583650 |
| 6  | 6.764656  | -6.250496 | -0.754775 |
| 1  | 6.384889  | -6.840583 | 0.086953  |
| 1  | 7.621099  | -6.783989 | -1.186395 |
| 1  | 7.132448  | -5.296269 | -0.359032 |
| 6  | 4.681106  | -7.628642 | -2.595431 |
| 1  | 4.273355  | -8.180728 | -1.741947 |
| 1  | 3.872499  | -7.480375 | -3.320847 |
| 1  | 5.443988  | -8.258664 | -3.070395 |
| 6  | 6.165340  | -5.101485 | -3.543931 |
| 1  | 5.410410  | -4.927147 | -4.319803 |
| 1  | 6.587895  | -4.130036 | -3.261124 |
| 1  | 6.970948  | -5.700034 | -3.987792 |
| 8  | 0.475747  | -6.263817 | -0.664294 |
| 6  | 1.325441  | -7.165155 | -0.529847 |
| 8  | 1.330631  | -8.242690 | -1.263529 |
| 6  | 0.295995  | -8.373776 | -2.260471 |
| 1  | 0.457542  | -9.350630 | -2.711938 |
| 1  | -0.686663 | -8.323793 | -1.788400 |
| 1  | 0.400211  | -7.583857 | -3.006789 |



Int14a

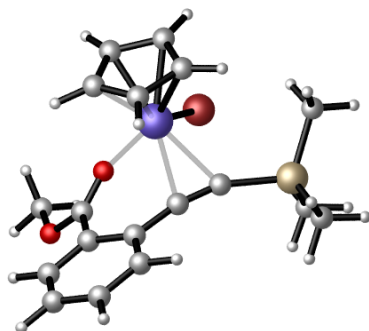

E = -1260.804724 Hartrees

G = -1260.513573 Hartrees

|    |           |           |           |
|----|-----------|-----------|-----------|
| 6  | 2.026229  | -3.230320 | 0.355573  |
| 1  | 2.945512  | -2.715964 | 0.112469  |
| 6  | 0.809806  | -3.168848 | -0.387049 |
| 1  | 0.665306  | -2.639556 | -1.318834 |
| 6  | -0.138363 | -4.027186 | 0.245486  |
| 1  | -1.146791 | -4.223816 | -0.092537 |
| 6  | 1.797926  | -4.058702 | 1.512189  |
| 1  | 2.530302  | -4.310259 | 2.267438  |
| 6  | 0.473031  | -4.544502 | 1.442449  |
| 1  | 0.020316  | -5.247862 | 2.129552  |
| 45 | 1.567087  | -5.197823 | -0.341320 |
| 6  | 3.212728  | -7.382812 | 1.335093  |
| 6  | 2.099103  | -8.242365 | 1.408081  |
| 6  | 4.185909  | -7.428587 | 2.337766  |
| 6  | 1.984413  | -9.136148 | 2.472514  |
| 6  | 4.052391  | -8.315997 | 3.400912  |
| 1  | 5.045751  | -6.770178 | 2.271996  |
| 6  | 2.954470  | -9.168821 | 3.469106  |
| 1  | 1.130241  | -9.801714 | 2.524021  |
| 1  | 4.812748  | -8.341184 | 4.174734  |
| 1  | 2.852061  | -9.863849 | 4.295744  |
| 6  | 3.418558  | -6.486989 | 0.229838  |
| 6  | 3.843597  | -5.781495 | -0.690885 |
| 14 | 5.033390  | -5.042260 | -1.946316 |
| 35 | 1.321558  | -5.377064 | -2.858096 |
| 6  | 6.678544  | -5.068509 | -1.040400 |
| 1  | 6.965367  | -6.090780 | -0.767360 |
| 1  | 7.468481  | -4.658939 | -1.682373 |
| 1  | 6.646038  | -4.467791 | -0.123880 |
| 6  | 5.066876  | -6.173172 | -3.436393 |
| 1  | 5.313297  | -7.201639 | -3.148217 |
| 1  | 4.099466  | -6.183142 | -3.947841 |
| 1  | 5.828872  | -5.830320 | -4.147637 |
| 6  | 4.534760  | -3.289012 | -2.367298 |
| 1  | 3.510139  | -3.240886 | -2.749947 |
| 1  | 4.622288  | -2.623528 | -1.500997 |
| 1  | 5.204317  | -2.901377 | -3.145775 |
| 8  | 0.772777  | -7.229845 | -0.341626 |
| 6  | 1.046024  | -8.201742 | 0.368010  |
| 8  | 0.380181  | -9.323823 | 0.252024  |
| 6  | -0.685322 | -9.364606 | -0.718922 |
| 1  | -1.105121 | -10.36516 | -0.634290 |
| 1  | -1.436670 | -8.609324 | -0.481768 |
| 1  | -0.280387 | -9.196902 | -1.718172 |

Int1d

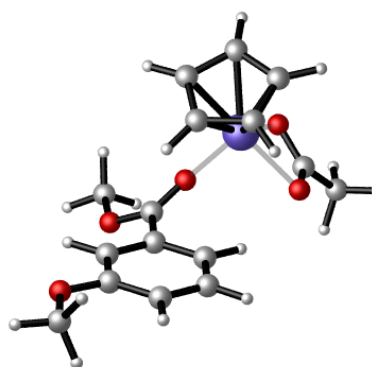

E = -1105.739099 Hartrees

G = -1105.471243 Hartrees

|    |           |           |           |
|----|-----------|-----------|-----------|
| 8  | -1.471826 | -0.326713 | 0.476217  |
| 6  | -2.204330 | -0.528507 | -0.545259 |
| 8  | -1.692106 | -1.188286 | -1.502015 |
| 6  | 1.905164  | 1.804881  | 0.040118  |
| 6  | 1.184209  | 1.522862  | 1.206839  |
| 6  | 3.219153  | 2.258927  | 0.099644  |
| 6  | 1.808296  | 1.697918  | 2.433085  |
| 6  | 3.843471  | 2.413518  | 1.342567  |
| 6  | 3.132558  | 2.130372  | 2.513346  |
| 1  | 0.152270  | 1.192991  | 1.148903  |
| 1  | 3.778335  | 2.482594  | -0.802534 |
| 1  | 3.593318  | 2.249495  | 3.487163  |
| 45 | 0.201793  | -1.237037 | -0.516011 |
| 6  | 1.996487  | -2.239827 | -1.152733 |
| 1  | 2.516386  | -1.993530 | -2.069055 |
| 6  | 0.950798  | -3.188859 | -1.016388 |
| 1  | 0.508798  | -3.762629 | -1.820892 |
| 6  | 0.482189  | -3.149929 | 0.338480  |
| 1  | -0.324181 | -3.739173 | 0.753677  |
| 6  | 2.221266  | -1.641139 | 0.136829  |
| 1  | 2.936539  | -0.860450 | 0.358257  |
| 6  | 1.306887  | -2.213302 | 1.053028  |
| 1  | 1.183516  | -1.924026 | 2.088604  |
| 6  | -3.601278 | -0.007054 | -0.605171 |
| 1  | -4.055398 | -0.223188 | -1.573136 |
| 1  | -4.191191 | -0.471852 | 0.191335  |
| 1  | -3.593424 | 1.072630  | -0.428246 |
| 8  | 0.440991  | 0.691927  | -1.518230 |
| 6  | 1.264680  | 1.583068  | -1.275358 |
| 8  | 1.637494  | 2.429064  | -2.202803 |
| 6  | 1.092062  | 2.251885  | -3.525124 |
| 1  | 1.568026  | 3.019811  | -4.132157 |
| 1  | 1.334532  | 1.256619  | -3.902764 |
| 1  | 0.010488  | 2.396278  | -3.502357 |
| 1  | 1.262192  | 1.497655  | 3.349726  |
| 8  | 5.124471  | 2.835766  | 1.304499  |
| 6  | 5.799148  | 3.041387  | 2.536215  |
| 1  | 6.800123  | 3.385787  | 2.273741  |
| 1  | 5.299341  | 3.806716  | 3.141089  |
| 1  | 5.876627  | 2.109744  | 3.108990  |

TS<sub>1-2</sub>d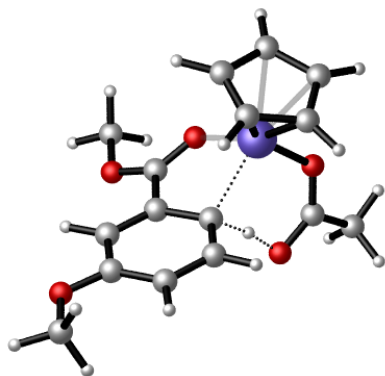

E = -1105.705687 Hartrees

G = -1105.443791 Hartrees

|    |           |           |           |
|----|-----------|-----------|-----------|
| 8  | -1.438346 | 1.189031  | 0.636929  |
| 6  | -2.021106 | 0.223703  | 0.071145  |
| 8  | -1.421146 | -0.802159 | -0.371288 |
| 6  | 1.802369  | 1.635037  | -0.242431 |
| 6  | 1.153880  | 0.824676  | 0.724754  |
| 6  | 2.828688  | 2.500164  | 0.071827  |
| 6  | 1.621262  | 0.925921  | 2.042786  |
| 6  | 3.267936  | 2.574445  | 1.407212  |
| 6  | 2.660346  | 1.781826  | 2.391584  |
| 1  | -0.140563 | 0.896743  | 0.678822  |
| 1  | 3.315075  | 3.112276  | -0.680365 |
| 1  | 2.982153  | 1.836613  | 3.425168  |
| 45 | 0.659520  | -1.055917 | -0.286394 |
| 6  | 2.466909  | -2.169476 | -0.721172 |
| 1  | 3.288677  | -1.754541 | -1.289704 |
| 6  | 1.341542  | -2.897554 | -1.264896 |
| 1  | 1.169163  | -3.108896 | -2.311781 |
| 6  | 0.489818  | -3.238873 | -0.195084 |
| 1  | -0.470130 | -3.730717 | -0.281304 |
| 6  | 2.302378  | -2.087026 | 0.681428  |
| 1  | 2.967515  | -1.583849 | 1.370026  |
| 6  | 1.041784  | -2.691192 | 1.015094  |
| 1  | 0.618277  | -2.782663 | 2.006010  |
| 6  | -3.515016 | 0.288448  | -0.091031 |
| 1  | -3.897749 | -0.609269 | -0.577443 |
| 1  | -3.979397 | 0.406183  | 0.892865  |
| 1  | -3.772268 | 1.170433  | -0.685801 |
| 8  | 0.695059  | 0.408404  | -1.928641 |
| 6  | 1.321868  | 1.434757  | -1.624551 |
| 8  | 1.584593  | 2.380402  | -2.483063 |
| 6  | 1.154276  | 2.179057  | -3.845481 |
| 1  | 1.455659  | 3.081307  | -4.373948 |
| 1  | 1.650864  | 1.301884  | -4.264431 |
| 1  | 0.070635  | 2.054775  | -3.879724 |
| 1  | 1.141405  | 0.341630  | 2.822995  |
| 8  | 4.270168  | 3.431027  | 1.632401  |
| 6  | 4.777155  | 3.564249  | 2.956141  |
| 1  | 5.570229  | 4.309430  | 2.894140  |
| 1  | 3.999606  | 3.916955  | 3.641958  |
| 1  | 5.192632  | 2.616963  | 3.316582  |

Int2d

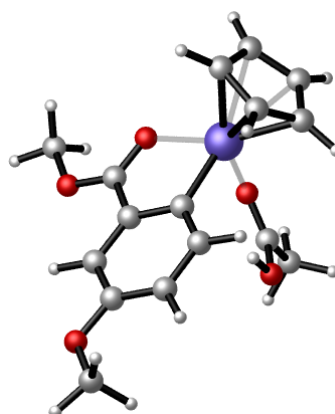

E = -1105.733910 Hartrees

G = -1105.466640 Hartrees

|    |           |           |           |
|----|-----------|-----------|-----------|
| 8  | -1.045926 | 0.757434  | 1.654815  |
| 6  | -1.623712 | 0.442262  | 0.516242  |
| 8  | -1.040250 | -0.137032 | -0.402638 |
| 6  | 2.041645  | 1.503703  | -0.432097 |
| 6  | 1.809816  | 0.410120  | 0.424855  |
| 6  | 2.610845  | 2.692110  | 0.008363  |
| 6  | 2.194606  | 0.552124  | 1.756058  |
| 6  | 2.975208  | 2.816557  | 1.352769  |
| 6  | 2.765365  | 1.742194  | 2.222788  |
| 1  | -0.092734 | 0.531307  | 1.612414  |
| 1  | 2.781491  | 3.521710  | -0.670305 |
| 1  | 3.043817  | 1.813135  | 3.268261  |
| 45 | 0.903672  | -1.160152 | -0.475447 |
| 6  | 2.297449  | -2.723641 | -0.848887 |
| 1  | 3.236718  | -2.559798 | -1.360741 |
| 6  | 1.074229  | -3.227723 | -1.458496 |
| 1  | 0.929666  | -3.407895 | -2.515444 |
| 6  | 0.108542  | -3.319843 | -0.465787 |
| 1  | -0.932518 | -3.579484 | -0.606628 |
| 6  | 2.082451  | -2.625079 | 0.556817  |
| 1  | 2.812560  | -2.316946 | 1.292386  |
| 6  | 0.699046  | -2.871803 | 0.788092  |
| 1  | 0.200228  | -2.855500 | 1.748088  |
| 6  | -3.058069 | 0.841341  | 0.430438  |
| 1  | -3.469322 | 0.561052  | -0.538648 |
| 1  | -3.615674 | 0.345164  | 1.231422  |
| 1  | -3.148273 | 1.920884  | 0.582900  |
| 8  | 1.183224  | 0.162204  | -2.163798 |
| 6  | 1.643266  | 1.266331  | -1.823602 |
| 8  | 1.796435  | 2.247818  | -2.671703 |
| 6  | 1.403725  | 2.012303  | -4.038007 |
| 1  | 1.628380  | 2.939540  | -4.561839 |
| 1  | 1.979379  | 1.184380  | -4.455734 |
| 1  | 0.335216  | 1.793721  | -4.086246 |
| 1  | 2.051034  | -0.260935 | 2.463553  |
| 8  | 3.520988  | 3.999648  | 1.707786  |
| 6  | 3.936286  | 4.169062  | 3.053487  |
| 1  | 4.352823  | 5.175311  | 3.113205  |
| 1  | 3.091650  | 4.087233  | 3.748009  |
| 1  | 4.709635  | 3.441391  | 3.326234  |

Int1e

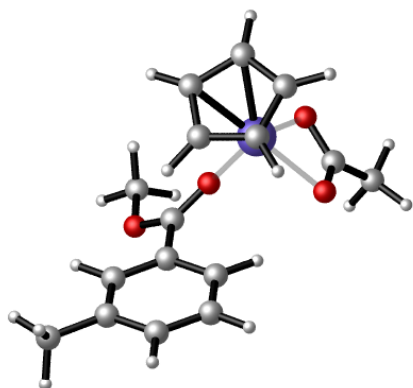

E =-1030.558347 Hartrees

G =-1030.294924 Hartrees

|    |           |           |           |
|----|-----------|-----------|-----------|
| 8  | -1.520555 | -0.356275 | 0.640505  |
| 6  | -2.263011 | -0.586591 | -0.366988 |
| 8  | -1.763634 | -1.278872 | -1.308223 |
| 6  | 1.818582  | 1.883140  | -0.014225 |
| 6  | 1.202195  | 1.603283  | 1.207641  |
| 6  | 3.097754  | 2.447918  | -0.055381 |
| 6  | 1.882136  | 1.885524  | 2.387080  |
| 6  | 3.789761  | 2.718663  | 1.123964  |
| 6  | 3.162940  | 2.429198  | 2.342581  |
| 1  | 0.198780  | 1.189424  | 1.232742  |
| 1  | 3.561854  | 2.661995  | -1.013483 |
| 1  | 3.688411  | 2.639673  | 3.270885  |
| 45 | 0.148103  | -1.274099 | -0.354838 |
| 6  | 2.185138  | -1.617618 | 0.272519  |
| 1  | 2.888752  | -0.816400 | 0.454488  |
| 6  | 1.952110  | -2.265977 | -0.991252 |
| 1  | 2.451666  | -2.041450 | -1.924279 |
| 6  | 0.925448  | -3.227487 | -0.805423 |
| 1  | 0.481532  | -3.836960 | -1.582141 |
| 6  | 1.297254  | -2.176321 | 1.222957  |
| 1  | 1.186171  | -1.854356 | 2.250369  |
| 6  | 0.480518  | -3.153472 | 0.555622  |
| 1  | -0.307253 | -3.742922 | 1.004790  |
| 6  | -3.642178 | -0.024719 | -0.459595 |
| 1  | -4.270625 | -0.655505 | -1.091510 |
| 1  | -4.080224 | 0.077407  | 0.535446  |
| 1  | -3.578509 | 0.970749  | -0.913722 |
| 8  | 0.302207  | 0.631856  | -1.407583 |
| 6  | 1.109788  | 1.558890  | -1.268449 |
| 8  | 1.392657  | 2.355738  | -2.270572 |
| 6  | 0.770721  | 2.070171  | -3.538785 |
| 1  | 1.183344  | 2.803103  | -4.229781 |
| 1  | 1.016597  | 1.055950  | -3.859581 |
| 1  | -0.311187 | 2.187711  | -3.456333 |
| 1  | 1.409392  | 1.685751  | 3.343649  |
| 6  | 5.169741  | 3.322329  | 1.097794  |
| 1  | 5.870613  | 2.727024  | 1.693011  |
| 1  | 5.557703  | 3.390238  | 0.077327  |
| 1  | 5.158739  | 4.332631  | 1.522839  |

TS<sub>1-2e</sub>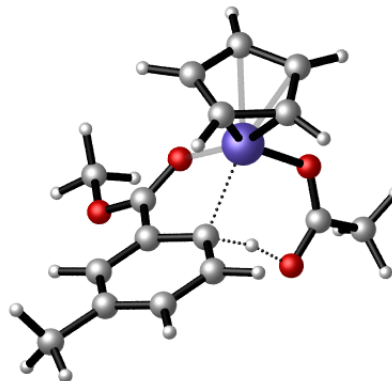

E =-1030.522412 Hartrees

G =-1030.264837 Hartrees

|    |           |           |           |
|----|-----------|-----------|-----------|
| 8  | -1.407145 | 1.132639  | 0.696569  |
| 6  | -1.997423 | 0.196737  | 0.093178  |
| 8  | -1.401580 | -0.814438 | -0.391632 |
| 6  | 1.807944  | 1.664220  | -0.264058 |
| 6  | 1.198881  | 0.852265  | 0.719215  |
| 6  | 2.832469  | 2.549541  | 0.036198  |
| 6  | 1.683469  | 0.959860  | 2.027237  |
| 6  | 3.309583  | 2.639627  | 1.351036  |
| 6  | 2.722835  | 1.835112  | 2.333514  |
| 1  | -0.102444 | 0.839987  | 0.690930  |
| 1  | 3.277006  | 3.160962  | -0.744065 |
| 1  | 3.081433  | 1.906045  | 3.356958  |
| 45 | 0.675297  | -1.044592 | -0.294440 |
| 6  | 2.465503  | -2.167379 | -0.789664 |
| 1  | 3.249606  | -1.766974 | -1.418836 |
| 6  | 1.305257  | -2.898959 | -1.246858 |
| 1  | 1.075045  | -3.145575 | -2.274644 |
| 6  | 0.517281  | -3.208563 | -0.115009 |
| 1  | -0.448017 | -3.697210 | -0.129876 |
| 6  | 2.378559  | -2.034774 | 0.614082  |
| 1  | 3.080178  | -1.508627 | 1.247083  |
| 6  | 1.139776  | -2.630510 | 1.041388  |
| 1  | 0.773306  | -2.686670 | 2.057246  |
| 6  | -3.484711 | 0.285192  | -0.105539 |
| 1  | -3.920191 | -0.707223 | -0.233220 |
| 1  | -3.950657 | 0.803568  | 0.734710  |
| 1  | -3.672491 | 0.867487  | -1.014937 |
| 8  | 0.683477  | 0.419379  | -1.928301 |
| 6  | 1.302003  | 1.454985  | -1.632734 |
| 8  | 1.532869  | 2.403687  | -2.498151 |
| 6  | 1.070508  | 2.197874  | -3.848945 |
| 1  | 1.348421  | 3.103468  | -4.384651 |
| 1  | 1.565194  | 1.326131  | -4.281348 |
| 1  | -0.012346 | 2.062251  | -3.855317 |
| 1  | 1.224232  | 0.374254  | 2.818630  |
| 6  | 4.441820  | 3.571906  | 1.681509  |
| 1  | 5.391611  | 3.163992  | 1.314973  |
| 1  | 4.300030  | 4.546872  | 1.204075  |
| 1  | 4.534042  | 3.722793  | 2.760564  |

Int2e

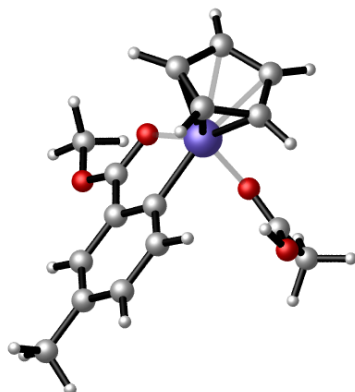

E =-1030.554765 Hartrees

G =-1030.289636 Hartrees

|    |           |           |           |
|----|-----------|-----------|-----------|
| 8  | -1.198478 | 0.070217  | 1.839746  |
| 6  | -1.592487 | 0.317242  | 0.608224  |
| 8  | -0.953382 | -0.028690 | -0.387699 |
| 6  | 2.029089  | 1.557058  | -0.513141 |
| 6  | 1.805624  | 0.493779  | 0.375249  |
| 6  | 2.556239  | 2.781747  | -0.092252 |
| 6  | 2.145255  | 0.689300  | 1.713797  |
| 6  | 2.883384  | 2.973916  | 1.246434  |
| 6  | 2.670938  | 1.909870  | 2.134802  |
| 1  | -0.328751 | -0.376251 | 1.821931  |
| 1  | 2.706860  | 3.581268  | -0.812570 |
| 1  | 2.922334  | 2.043968  | 3.184607  |
| 45 | 0.933516  | -1.118644 | -0.479712 |
| 6  | 2.342199  | -2.673204 | -0.842468 |
| 1  | 3.276715  | -2.504792 | -1.361451 |
| 6  | 1.119842  | -3.193831 | -1.440310 |
| 1  | 0.970618  | -3.382265 | -2.495151 |
| 6  | 0.161355  | -3.288581 | -0.441272 |
| 1  | -0.877202 | -3.562846 | -0.572363 |
| 6  | 2.135211  | -2.565702 | 0.563490  |
| 1  | 2.865551  | -2.242459 | 1.292522  |
| 6  | 0.757286  | -2.831078 | 0.806529  |
| 1  | 0.268651  | -2.829080 | 1.772443  |
| 6  | -2.883981 | 1.055331  | 0.517917  |
| 1  | -3.152615 | 1.211123  | -0.526203 |
| 1  | -3.667006 | 0.486798  | 1.028877  |
| 1  | -2.783335 | 2.018365  | 1.027994  |
| 8  | 1.202033  | 0.145156  | -2.198484 |
| 6  | 1.652959  | 1.265492  | -1.894992 |
| 8  | 1.808685  | 2.211910  | -2.783027 |
| 6  | 1.427519  | 1.917748  | -4.140832 |
| 1  | 1.663002  | 2.819304  | -4.703660 |
| 1  | 2.001652  | 1.068972  | -4.516953 |
| 1  | 0.358160  | 1.703457  | -4.190280 |
| 1  | 2.001255  | -0.103579 | 2.443990  |
| 6  | 3.461239  | 4.276175  | 1.737022  |
| 1  | 4.513063  | 4.154299  | 2.021283  |
| 1  | 3.410473  | 5.049753  | 0.965092  |
| 1  | 2.924361  | 4.638097  | 2.620543  |

Int1f

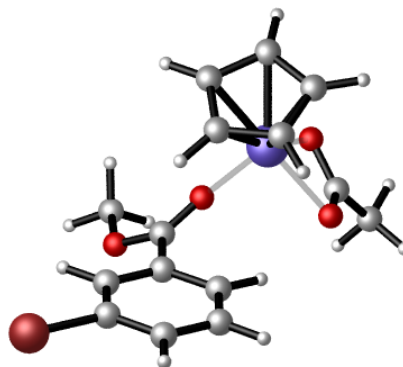

E =-1003.827036 Hartrees

G =-1003.603556 Hartrees

|    |           |           |           |
|----|-----------|-----------|-----------|
| 8  | -1.449499 | -0.370409 | 0.466152  |
| 6  | -2.175438 | -0.560035 | -0.561830 |
| 8  | -1.665340 | -1.232164 | -1.512164 |
| 6  | 1.864988  | 1.821085  | 0.054719  |
| 6  | 1.178995  | 1.488803  | 1.225184  |
| 6  | 3.159927  | 2.343356  | 0.105990  |
| 6  | 1.798470  | 1.670954  | 2.455355  |
| 6  | 3.764280  | 2.497981  | 1.347500  |
| 6  | 3.098362  | 2.166880  | 2.525331  |
| 1  | 0.163745  | 1.108846  | 1.172051  |
| 1  | 3.682524  | 2.603471  | -0.807698 |
| 1  | 3.581090  | 2.297082  | 3.487813  |
| 45 | 0.224706  | -1.280364 | -0.527581 |
| 6  | 2.017393  | -2.279395 | -1.176294 |
| 1  | 2.530385  | -2.034391 | -2.096829 |
| 6  | 0.975274  | -3.231152 | -1.030087 |
| 1  | 0.528099  | -3.807153 | -1.830129 |
| 6  | 0.516599  | -3.190256 | 0.327735  |
| 1  | -0.285835 | -3.779850 | 0.750072  |
| 6  | 2.251025  | -1.678634 | 0.110966  |
| 1  | 2.966939  | -0.896788 | 0.325620  |
| 6  | 1.344569  | -2.250111 | 1.034795  |
| 1  | 1.229111  | -1.961194 | 2.071413  |
| 6  | -3.543738 | 0.024073  | -0.668197 |
| 1  | -4.175573 | -0.598323 | -1.305194 |
| 1  | -3.989952 | 0.135570  | 0.322021  |
| 1  | -3.459429 | 1.016480  | -1.125847 |
| 8  | 0.437978  | 0.665721  | -1.507699 |
| 6  | 1.217883  | 1.591573  | -1.258280 |
| 8  | 1.538126  | 2.475203  | -2.168641 |
| 6  | 0.988731  | 2.300258  | -3.491000 |
| 1  | 1.412576  | 3.110373  | -4.081196 |
| 1  | 1.286291  | 1.330765  | -3.895072 |
| 1  | -0.098932 | 2.379152  | -3.453138 |
| 1  | 1.269101  | 1.428402  | 3.370874  |
| 35 | 5.547789  | 3.180549  | 1.438217  |

TS<sub>1-2f</sub>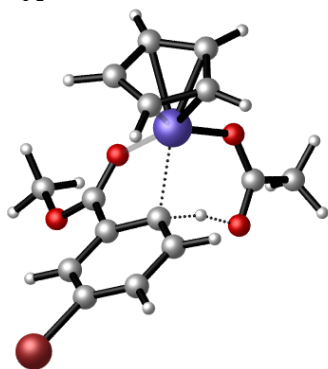

E =-1003.789525 Hartrees

G =-1003.570464 Hartrees

|    |           |           |           |
|----|-----------|-----------|-----------|
| 8  | -1.406629 | 1.114222  | 0.694850  |
| 6  | -1.997969 | 0.185967  | 0.080979  |
| 8  | -1.401951 | -0.822331 | -0.411856 |
| 6  | 1.813474  | 1.667480  | -0.265625 |
| 6  | 1.200495  | 0.876974  | 0.727121  |
| 6  | 2.853196  | 2.546055  | 0.014292  |
| 6  | 1.682643  | 0.989800  | 2.035443  |
| 6  | 3.307869  | 2.615289  | 1.329064  |
| 6  | 2.736279  | 1.846933  | 2.342059  |
| 1  | -0.102026 | 0.823867  | 0.686825  |
| 1  | 3.305019  | 3.142117  | -0.770741 |
| 1  | 3.102036  | 1.920007  | 3.360540  |
| 45 | 0.670964  | -1.048725 | -0.287728 |
| 6  | 2.460567  | -2.176091 | -0.778314 |
| 1  | 3.245694  | -1.779446 | -1.408600 |
| 6  | 1.291390  | -2.893687 | -1.234599 |
| 1  | 1.056384  | -3.136322 | -2.262338 |
| 6  | 0.503900  | -3.203307 | -0.099595 |
| 1  | -0.465088 | -3.684609 | -0.113900 |
| 6  | 2.374497  | -2.042360 | 0.624318  |
| 1  | 3.080210  | -1.521016 | 1.256831  |
| 6  | 1.132997  | -2.632766 | 1.054485  |
| 1  | 0.766707  | -2.683159 | 2.070744  |
| 6  | -3.483798 | 0.278683  | -0.121785 |
| 1  | -3.921269 | -0.712581 | -0.251402 |
| 1  | -3.950518 | 0.797908  | 0.717394  |
| 1  | -3.666802 | 0.861710  | -1.031667 |
| 8  | 0.689817  | 0.416132  | -1.925532 |
| 6  | 1.306936  | 1.452568  | -1.636165 |
| 8  | 1.540208  | 2.399835  | -2.499676 |
| 6  | 1.078493  | 2.196737  | -3.852511 |
| 1  | 1.357513  | 3.103458  | -4.385364 |
| 1  | 1.573894  | 1.325456  | -4.284649 |
| 1  | -0.004330 | 2.061799  | -3.858182 |
| 1  | 1.217596  | 0.417998  | 2.832743  |
| 35 | 4.749223  | 3.790965  | 1.749473  |

Int2f

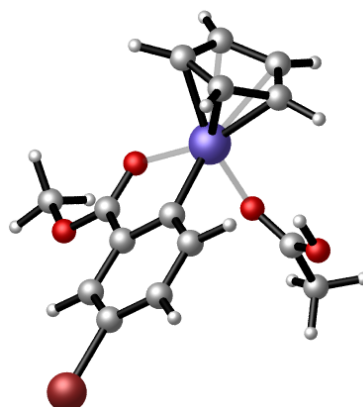

E =-1003.824161 Hartrees

G =-1003.598562 Hartrees

|    |           |           |           |
|----|-----------|-----------|-----------|
| 8  | -1.396654 | -0.030746 | 1.751707  |
| 6  | -1.723461 | 0.226266  | 0.503541  |
| 8  | -1.012241 | -0.082487 | -0.455887 |
| 6  | 1.849860  | 1.680916  | -0.506609 |
| 6  | 1.650179  | 0.632133  | 0.404686  |
| 6  | 2.305529  | 2.941492  | -0.114286 |
| 6  | 1.927965  | 0.876182  | 1.749698  |
| 6  | 2.568489  | 3.146332  | 1.231427  |
| 6  | 2.384323  | 2.126341  | 2.165413  |
| 1  | -0.524853 | -0.473391 | 1.777086  |
| 1  | 2.446003  | 3.729259  | -0.846624 |
| 1  | 2.594063  | 2.301385  | 3.215732  |
| 45 | 0.926468  | -1.054343 | -0.436739 |
| 6  | 2.448690  | -2.521440 | -0.725735 |
| 1  | 3.368671  | -2.306003 | -1.253516 |
| 6  | 1.272619  | -3.161601 | -1.297625 |
| 1  | 1.143525  | -3.415461 | -2.341307 |
| 6  | 0.317922  | -3.271798 | -0.296701 |
| 1  | -0.696676 | -3.629611 | -0.413902 |
| 6  | 2.230825  | -2.359784 | 0.671549  |
| 1  | 2.935632  | -1.952904 | 1.383860  |
| 6  | 0.872689  | -2.708312 | 0.927069  |
| 1  | 0.386937  | -2.706104 | 1.894446  |
| 6  | -3.033960 | 0.915447  | 0.342645  |
| 1  | -3.224934 | 1.114469  | -0.711168 |
| 1  | -3.826059 | 0.282639  | 0.755126  |
| 1  | -3.024719 | 1.851497  | 0.909201  |
| 8  | 1.170423  | 0.186598  | -2.187489 |
| 6  | 1.535995  | 1.338582  | -1.896926 |
| 8  | 1.655690  | 2.280853  | -2.792015 |
| 6  | 1.340376  | 1.945713  | -4.158847 |
| 1  | 1.475428  | 2.871587  | -4.714629 |
| 1  | 2.025788  | 1.176204  | -4.519435 |
| 1  | 0.307416  | 1.600477  | -4.230650 |
| 1  | 1.791559  | 0.099260  | 2.497052  |
| 35 | 3.194511  | 4.855112  | 1.818784  |

## Int1g

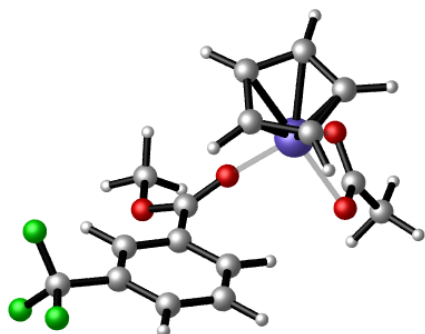

E =-1328.199264 Hartrees

G =-1327.963256 Hartrees

|    |           |           |           |
|----|-----------|-----------|-----------|
| 8  | -1.460060 | -0.301877 | 0.650117  |
| 6  | -2.219120 | -0.530370 | -0.346792 |
| 8  | -1.740233 | -1.237765 | -1.286865 |
| 6  | 1.856457  | 1.902681  | -0.037067 |
| 6  | 1.271513  | 1.617130  | 1.201409  |
| 6  | 3.137711  | 2.444623  | -0.107549 |
| 6  | 1.979273  | 1.866208  | 2.369244  |
| 6  | 3.844258  | 2.669995  | 1.071432  |
| 6  | 3.271636  | 2.384447  | 2.307609  |
| 1  | 0.261765  | 1.220245  | 1.245484  |
| 1  | 1.524403  | 1.660907  | 3.332330  |
| 1  | 3.824964  | 2.568977  | 3.221655  |
| 45 | 0.179408  | -1.255656 | -0.351859 |
| 6  | 2.210008  | -1.628255 | 0.283705  |
| 1  | 2.925365  | -0.840835 | 0.478534  |
| 6  | 1.976907  | -2.262890 | -0.987423 |
| 1  | 2.483424  | -2.034487 | -1.915817 |
| 6  | 0.938675  | -3.213408 | -0.817252 |
| 1  | 0.492036  | -3.809927 | -1.602402 |
| 6  | 1.311303  | -2.186371 | 1.224101  |
| 1  | 1.198033  | -1.873730 | 2.254178  |
| 6  | 0.485197  | -3.145152 | 0.542359  |
| 1  | -0.312263 | -3.729161 | 0.981486  |
| 6  | -3.593518 | 0.045586  | -0.416395 |
| 1  | -4.175438 | -0.438697 | -1.202039 |
| 1  | -4.093020 | -0.063811 | 0.549791  |
| 1  | -3.511952 | 1.116094  | -0.635569 |
| 8  | 0.341334  | 0.645262  | -1.424501 |
| 6  | 1.110691  | 1.600210  | -1.279463 |
| 8  | 1.323450  | 2.453464  | -2.248820 |
| 6  | 0.666466  | 2.204402  | -3.508553 |
| 1  | 0.985201  | 3.015773  | -4.160047 |
| 1  | 0.981808  | 1.239659  | -3.910690 |
| 1  | -0.415946 | 2.222805  | -3.371919 |
| 1  | 3.587262  | 2.670660  | -1.069124 |
| 6  | 5.237840  | 3.226805  | 0.965394  |
| 9  | 6.042169  | 2.403870  | 0.265441  |
| 9  | 5.248091  | 4.408839  | 0.323722  |
| 9  | 5.807934  | 3.417044  | 2.163428  |

## TS1-2g

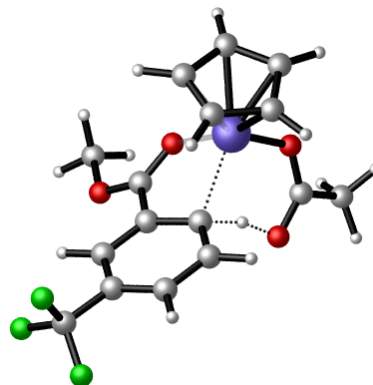

E =-1328.161041 Hartrees

G =-1327.928989 Hartrees

|    |           |           |           |
|----|-----------|-----------|-----------|
| 8  | -1.426592 | 1.105987  | 0.672403  |
| 6  | -2.012050 | 0.172827  | 0.060753  |
| 8  | -1.407786 | -0.829974 | -0.434731 |
| 6  | 1.802492  | 1.685673  | -0.266720 |
| 6  | 1.182138  | 0.902772  | 0.726102  |
| 6  | 2.842366  | 2.561772  | 0.022172  |
| 6  | 1.645840  | 1.022503  | 2.040088  |
| 6  | 3.289818  | 2.643297  | 1.337500  |
| 6  | 2.698147  | 1.879488  | 2.344738  |
| 1  | -0.123172 | 0.822963  | 0.668801  |
| 1  | 3.303851  | 3.150973  | -0.762450 |
| 1  | 3.055615  | 1.959923  | 3.366462  |
| 45 | 0.665507  | -1.033698 | -0.291078 |
| 6  | 2.463604  | -2.148882 | -0.777309 |
| 1  | 3.241340  | -1.749439 | -1.415006 |
| 6  | 1.297228  | -2.877468 | -1.222166 |
| 1  | 1.059497  | -3.131771 | -2.246433 |
| 6  | 0.518460  | -3.185651 | -0.079265 |
| 1  | -0.446891 | -3.674430 | -0.084852 |
| 6  | 2.382569  | -2.002847 | 0.624199  |
| 1  | 3.086194  | -1.468697 | 1.248399  |
| 6  | 1.148712  | -2.601857 | 1.066116  |
| 1  | 0.787397  | -2.645243 | 2.084453  |
| 6  | -3.500515 | 0.239891  | -0.132571 |
| 1  | -3.945573 | -0.747892 | 0.006564  |
| 1  | -3.946094 | 0.960265  | 0.554639  |
| 1  | -3.699463 | 0.557490  | -1.162093 |
| 8  | 0.691214  | 0.425198  | -1.928559 |
| 6  | 1.305724  | 1.463723  | -1.638386 |
| 8  | 1.542595  | 2.407450  | -2.504938 |
| 6  | 1.089629  | 2.197529  | -3.859602 |
| 1  | 1.369894  | 3.102587  | -4.394665 |
| 1  | 1.589346  | 1.325513  | -4.285210 |
| 1  | 0.007128  | 2.060281  | -3.871562 |
| 1  | 1.169110  | 0.456037  | 2.833967  |
| 6  | 4.465032  | 3.518322  | 1.688064  |
| 9  | 4.724374  | 4.428188  | 0.738148  |
| 9  | 5.581726  | 2.784383  | 1.850565  |
| 9  | 4.263507  | 4.180487  | 2.838436  |

Int2g

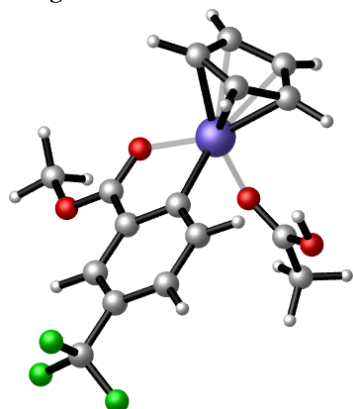

E =-1328.197035 Hartrees

G =-1327.957888 Hartrees

|    |           |           |           |
|----|-----------|-----------|-----------|
| 8  | -1.291747 | 0.018091  | 1.759677  |
| 6  | -1.616830 | 0.316820  | 0.520461  |
| 8  | -0.947397 | -0.035801 | -0.454206 |
| 6  | 2.036566  | 1.549131  | -0.506996 |
| 6  | 1.766268  | 0.512921  | 0.402025  |
| 6  | 2.573237  | 2.772947  | -0.106059 |
| 6  | 2.051756  | 0.734995  | 1.750506  |
| 6  | 2.850572  | 2.964991  | 1.239162  |
| 6  | 2.590679  | 1.949042  | 2.164086  |
| 1  | -0.455337 | -0.489795 | 1.765412  |
| 1  | 2.766421  | 3.552953  | -0.834526 |
| 1  | 2.808325  | 2.108880  | 3.215950  |
| 45 | 0.935042  | -1.121274 | -0.449643 |
| 6  | 2.357093  | -2.678648 | -0.759322 |
| 1  | 3.297833  | -2.514311 | -1.268287 |
| 6  | 1.145280  | -3.211246 | -1.366127 |
| 1  | 1.011520  | -3.419092 | -2.419377 |
| 6  | 0.171892  | -3.288981 | -0.379614 |
| 1  | -0.864729 | -3.565601 | -0.521250 |
| 6  | 2.129273  | -2.543444 | 0.640338  |
| 1  | 2.849120  | -2.205911 | 1.373372  |
| 6  | 0.747728  | -2.807490 | 0.868687  |
| 1  | 0.246820  | -2.799968 | 1.828508  |
| 6  | -2.862789 | 1.122647  | 0.391451  |
| 1  | -3.094019 | 1.287665  | -0.660129 |
| 1  | -3.689489 | 0.604761  | 0.886392  |
| 1  | -2.718593 | 2.082669  | 0.897776  |
| 8  | 1.251207  | 0.108920  | -2.187345 |
| 6  | 1.693958  | 1.233754  | -1.895490 |
| 8  | 1.866522  | 2.168857  | -2.789277 |
| 6  | 1.505541  | 1.862347  | -4.151510 |
| 1  | 1.751542  | 2.758436  | -4.718240 |
| 1  | 2.084092  | 1.008936  | -4.509461 |
| 1  | 0.436525  | 1.650048  | -4.213334 |
| 1  | 1.856684  | -0.032676 | 2.493956  |
| 6  | 3.468550  | 4.247065  | 1.720683  |
| 9  | 3.415972  | 5.217420  | 0.794893  |
| 9  | 4.765559  | 4.081684  | 2.045358  |
| 9  | 2.854466  | 4.712168  | 2.823914  |

Int1h

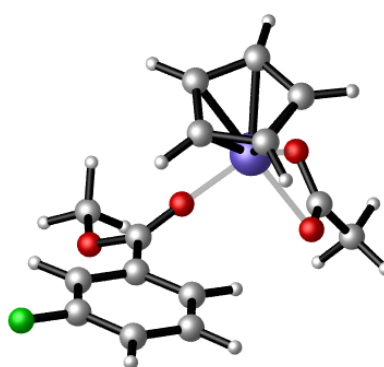

E =-1090.456123 Hartrees

G =-1090.228175 Hartrees

|    |           |           |           |
|----|-----------|-----------|-----------|
| 8  | -1.462892 | -0.372652 | 0.464889  |
| 6  | -2.188961 | -0.558314 | -0.563489 |
| 8  | -1.676696 | -1.219675 | -1.520261 |
| 6  | 1.877774  | 1.810684  | 0.056982  |
| 6  | 1.186518  | 1.485870  | 1.227442  |
| 6  | 3.179353  | 2.315585  | 0.108322  |
| 6  | 1.807996  | 1.659517  | 2.459591  |
| 6  | 3.771692  | 2.457400  | 1.351583  |
| 6  | 3.113489  | 2.138807  | 2.531061  |
| 1  | 0.166725  | 1.118971  | 1.173242  |
| 1  | 3.727496  | 2.576901  | -0.789839 |
| 1  | 1.273235  | 1.422238  | 3.373391  |
| 1  | 3.618293  | 2.273048  | 3.481766  |
| 45 | 0.214006  | -1.269920 | -0.535469 |
| 6  | 2.010208  | -2.261242 | -1.188207 |
| 1  | 2.523862  | -2.009744 | -2.106615 |
| 6  | 0.969765  | -3.215996 | -1.048802 |
| 1  | 0.525093  | -3.788497 | -1.852725 |
| 6  | 0.509626  | -3.184223 | 0.308676  |
| 1  | -0.291763 | -3.778416 | 0.726513  |
| 6  | 2.240727  | -1.667148 | 0.102634  |
| 1  | 2.954527  | -0.884933 | 0.323232  |
| 6  | 1.334527  | -2.246262 | 1.022148  |
| 1  | 1.217067  | -1.963250 | 2.060150  |
| 6  | -3.561429 | 0.017551  | -0.662956 |
| 1  | -4.191558 | -0.606926 | -1.299678 |
| 1  | -4.004860 | 0.122947  | 0.329160  |
| 1  | -3.485408 | 1.011823  | -1.117903 |
| 8  | 0.422999  | 0.683664  | -1.500313 |
| 6  | 1.227023  | 1.590430  | -1.254843 |
| 8  | 1.570751  | 2.459608  | -2.171008 |
| 6  | 1.016711  | 2.291024  | -3.491760 |
| 1  | 1.467637  | 3.081032  | -4.089278 |
| 1  | 1.281213  | 1.308617  | -3.887592 |
| 1  | -0.067705 | 2.407438  | -3.455818 |
| 9  | 5.029874  | 2.919748  | 1.415384  |

TS<sub>1-2h</sub>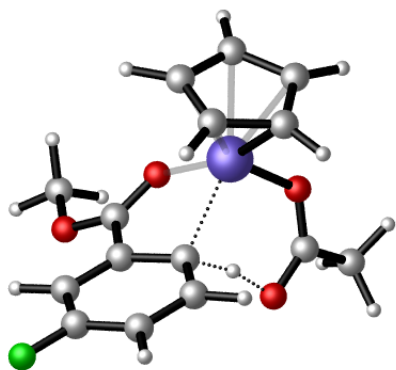

E = -1090.419871 Hartrees

G = -1090.197179 Hartrees

|    |           |           |           |
|----|-----------|-----------|-----------|
| 8  | -1.404861 | 1.143443  | 0.678088  |
| 6  | -1.994715 | 0.201151  | 0.084035  |
| 8  | -1.398222 | -0.815453 | -0.388964 |
| 6  | 1.815405  | 1.662136  | -0.270359 |
| 6  | 1.198875  | 0.867253  | 0.720374  |
| 6  | 2.852005  | 2.540640  | 0.012927  |
| 6  | 1.679615  | 0.976040  | 2.032839  |
| 6  | 3.288948  | 2.599384  | 1.330143  |
| 6  | 2.728080  | 1.834492  | 2.345226  |
| 1  | -0.102440 | 0.852618  | 0.681486  |
| 1  | 3.324284  | 3.150395  | -0.749254 |
| 1  | 1.211702  | 0.399215  | 2.824834  |
| 1  | 3.108165  | 1.928058  | 3.356886  |
| 45 | 0.676859  | -1.047797 | -0.285453 |
| 6  | 2.465596  | -2.174969 | -0.776202 |
| 1  | 3.251952  | -1.777912 | -1.404679 |
| 6  | 1.301233  | -2.899341 | -1.234595 |
| 1  | 1.069835  | -3.143119 | -2.262851 |
| 6  | 0.511042  | -3.207462 | -0.103092 |
| 1  | -0.456473 | -3.691632 | -0.119306 |
| 6  | 2.377217  | -2.042167 | 0.627000  |
| 1  | 3.080834  | -1.519865 | 1.261065  |
| 6  | 1.135479  | -2.633175 | 1.053468  |
| 1  | 0.767458  | -2.686411 | 2.068944  |
| 6  | -3.481480 | 0.287763  | -0.117143 |
| 1  | -3.915834 | -0.705119 | -0.244509 |
| 1  | -3.948850 | 0.806517  | 0.722125  |
| 1  | -3.668452 | 0.869611  | -1.026978 |
| 8  | 0.686621  | 0.413637  | -1.928749 |
| 6  | 1.306720  | 1.448490  | -1.640407 |
| 8  | 1.539918  | 2.395514  | -2.504729 |
| 6  | 1.071697  | 2.193627  | -3.855226 |
| 1  | 1.350137  | 3.099750  | -4.389470 |
| 1  | 1.563087  | 1.321345  | -4.290005 |
| 1  | -0.011447 | 2.060870  | -3.856257 |
| 9  | 4.293722  | 3.427779  | 1.630398  |

Int2h

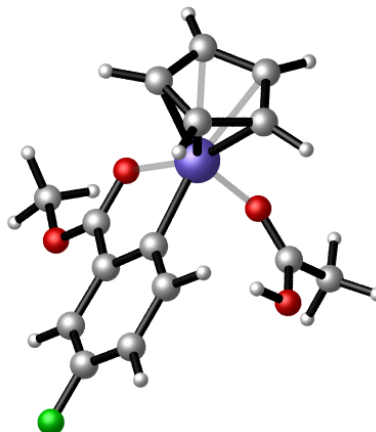

E = -1090.451066 Hartrees

G = -1090.224180 Hartrees

|    |           |           |           |
|----|-----------|-----------|-----------|
| 8  | -1.275719 | 0.782668  | 1.534809  |
| 6  | -1.759867 | 0.353918  | 0.390103  |
| 8  | -1.096262 | -0.282717 | -0.431222 |
| 6  | 1.847513  | 1.654020  | -0.434828 |
| 6  | 1.669615  | 0.582209  | 0.457663  |
| 6  | 2.332019  | 2.898223  | -0.029528 |
| 6  | 2.005962  | 0.789927  | 1.798579  |
| 6  | 2.643310  | 3.054846  | 1.308804  |
| 6  | 2.489094  | 2.026897  | 2.228943  |
| 1  | -0.320419 | 0.574355  | 1.586683  |
| 1  | 2.466616  | 3.716938  | -0.728195 |
| 1  | 1.892827  | -0.006382 | 2.529398  |
| 1  | 2.749477  | 2.196159  | 3.268739  |
| 45 | 0.931467  | -1.095534 | -0.407741 |
| 6  | 2.490200  | -2.519643 | -0.692132 |
| 1  | 3.419324  | -2.279079 | -1.192055 |
| 6  | 1.340998  | -3.169370 | -1.305832 |
| 1  | 1.240194  | -3.400703 | -2.357942 |
| 6  | 0.364500  | -3.321882 | -0.330851 |
| 1  | -0.640345 | -3.694238 | -0.481565 |
| 6  | 2.234105  | -2.396467 | 0.704045  |
| 1  | 2.913311  | -1.991525 | 1.441592  |
| 6  | 0.877768  | -2.774880 | 0.917570  |
| 1  | 0.357379  | -2.775199 | 1.866198  |
| 6  | -3.186612 | 0.717511  | 0.155921  |
| 1  | -3.566390 | 0.200785  | -0.724807 |
| 1  | -3.784939 | 0.465951  | 1.035971  |
| 1  | -3.253336 | 1.800318  | 0.004861  |
| 8  | 1.118915  | 0.201674  | -2.134586 |
| 6  | 1.487692  | 1.346630  | -1.823094 |
| 8  | 1.570882  | 2.316543  | -2.692938 |
| 6  | 1.204441  | 2.023101  | -4.056217 |
| 1  | 1.322791  | 2.964585  | -4.589158 |
| 1  | 1.871865  | 1.262601  | -4.465713 |
| 1  | 0.168049  | 1.683436  | -4.099657 |
| 9  | 3.114088  | 4.239228  | 1.731791  |



## Int1i

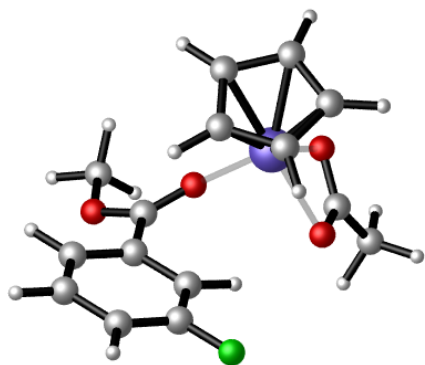

E = -1090.456510 Hartrees

G = -1090.229672 Hartrees

|    |           |           |           |
|----|-----------|-----------|-----------|
| 8  | -1.461665 | -0.324017 | 0.459425  |
| 6  | -2.196533 | -0.534125 | -0.559345 |
| 8  | -1.687658 | -1.206874 | -1.508535 |
| 6  | 1.898092  | 1.815566  | 0.015558  |
| 6  | 1.201008  | 1.471520  | 1.176483  |
| 6  | 3.197907  | 2.323106  | 0.083487  |
| 6  | 1.840683  | 1.632723  | 2.391244  |
| 6  | 3.812946  | 2.463304  | 1.324651  |
| 6  | 3.137854  | 2.116528  | 2.491941  |
| 1  | 0.182056  | 1.099756  | 1.141170  |
| 1  | 3.728354  | 2.588058  | -0.824350 |
| 1  | 3.600328  | 2.221508  | 3.467527  |
| 45 | 0.206926  | -1.251283 | -0.524045 |
| 6  | 2.001442  | -2.262016 | -1.147970 |
| 1  | 2.523496  | -2.024923 | -2.065493 |
| 6  | 0.954808  | -3.208542 | -1.004708 |
| 1  | 0.513939  | -3.789774 | -1.804484 |
| 6  | 0.482793  | -3.155550 | 0.348780  |
| 1  | -0.325792 | -3.739010 | 0.767836  |
| 6  | 2.223350  | -1.650812 | 0.136259  |
| 1  | 2.938734  | -0.868511 | 0.351936  |
| 6  | 1.307052  | -2.213019 | 1.056392  |
| 1  | 1.180674  | -1.912572 | 2.088614  |
| 6  | -3.591409 | -0.008515 | -0.622796 |
| 1  | -4.044017 | -0.224358 | -1.591513 |
| 1  | -4.184174 | -0.471580 | 0.172661  |
| 1  | -3.581039 | 1.071115  | -0.445972 |
| 8  | 0.446387  | 0.677674  | -1.536142 |
| 6  | 1.248845  | 1.587450  | -1.295649 |
| 8  | 1.596666  | 2.448369  | -2.217757 |
| 6  | 1.047958  | 2.268960  | -3.539202 |
| 1  | 1.499025  | 3.055908  | -4.140689 |
| 1  | 1.316838  | 1.284605  | -3.927250 |
| 1  | -0.036912 | 2.382607  | -3.508232 |
| 1  | 4.826439  | 2.845369  | 1.386157  |
| 9  | 1.181660  | 1.298606  | 3.512869  |

## TS1-2i

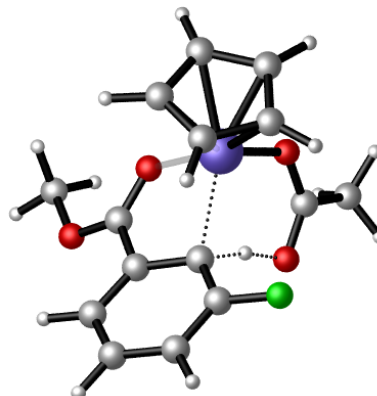

E = -1090.424301 Hartrees

G = -1090.201309 Hartrees

|    |           |           |           |
|----|-----------|-----------|-----------|
| 8  | -1.421086 | 1.153466  | 0.664042  |
| 6  | -1.998182 | 0.201892  | 0.076246  |
| 8  | -1.393135 | -0.817309 | -0.385013 |
| 6  | 1.813311  | 1.679447  | -0.268214 |
| 6  | 1.185382  | 0.884657  | 0.717804  |
| 6  | 2.861478  | 2.540113  | 0.022493  |
| 6  | 1.693718  | 0.994215  | 2.006499  |
| 6  | 3.325226  | 2.608009  | 1.339452  |
| 6  | 2.745962  | 1.836916  | 2.341451  |
| 1  | -0.096087 | 0.867628  | 0.689172  |
| 1  | 3.326426  | 3.133839  | -0.756821 |
| 1  | 3.096784  | 1.885125  | 3.366751  |
| 45 | 0.677748  | -1.052435 | -0.276532 |
| 6  | 2.465171  | -2.179615 | -0.766786 |
| 1  | 3.252557  | -1.783218 | -1.394308 |
| 6  | 1.294988  | -2.892923 | -1.227388 |
| 1  | 1.060981  | -3.130332 | -2.256617 |
| 6  | 0.504474  | -3.205840 | -0.095137 |
| 1  | -0.465313 | -3.685301 | -0.113335 |
| 6  | 2.375711  | -2.050104 | 0.636038  |
| 1  | 3.081935  | -1.534184 | 1.272689  |
| 6  | 1.132403  | -2.640756 | 1.061653  |
| 1  | 0.762608  | -2.688374 | 2.076547  |
| 6  | -3.484947 | 0.272338  | -0.136204 |
| 1  | -3.909480 | -0.725463 | -0.258222 |
| 1  | -3.962433 | 0.793296  | 0.696050  |
| 1  | -3.671618 | 0.845209  | -1.051787 |
| 8  | 0.689412  | 0.418409  | -1.921955 |
| 6  | 1.300094  | 1.459566  | -1.635695 |
| 8  | 1.523511  | 2.407351  | -2.502023 |
| 6  | 1.055480  | 2.198238  | -3.851302 |
| 1  | 1.328078  | 3.104235  | -4.388848 |
| 1  | 1.551171  | 1.327312  | -4.283964 |
| 1  | -0.026950 | 2.059470  | -3.850976 |
| 1  | 4.149705  | 3.268611  | 1.586375  |
| 9  | 1.127178  | 0.264164  | 2.977523  |

Int2i

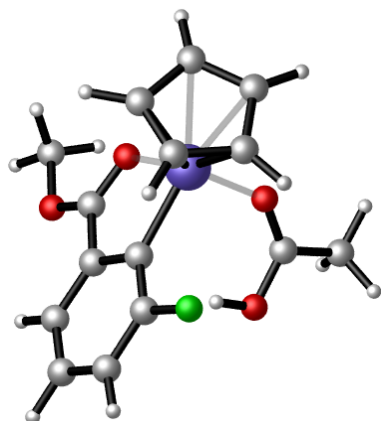

E =-1090.454551 Hartrees

G =-1090.225422 Hartrees

|    |           |           |           |
|----|-----------|-----------|-----------|
| 8  | -1.260825 | 1.386645  | 1.036264  |
| 6  | -1.820263 | 0.434640  | 0.321992  |
| 8  | -1.185214 | -0.460789 | -0.237160 |
| 6  | 1.872968  | 1.643911  | -0.384467 |
| 6  | 1.639109  | 0.569932  | 0.495722  |
| 6  | 2.394549  | 2.866766  | 0.039454  |
| 6  | 1.960358  | 0.790397  | 1.827265  |
| 6  | 2.698458  | 3.033765  | 1.386463  |
| 6  | 2.480481  | 1.994534  | 2.288699  |
| 1  | -0.288438 | 1.268013  | 1.038569  |
| 1  | 2.555745  | 3.671085  | -0.670375 |
| 1  | 2.706605  | 2.108154  | 3.344096  |
| 45 | 0.897938  | -1.109688 | -0.373895 |
| 6  | 2.488942  | -2.472012 | -0.746276 |
| 1  | 3.397912  | -2.188404 | -1.260497 |
| 6  | 1.338114  | -3.123302 | -1.353775 |
| 1  | 1.213827  | -3.318020 | -2.410818 |
| 6  | 0.392243  | -3.337346 | -0.357899 |
| 1  | -0.608097 | -3.725333 | -0.498075 |
| 6  | 2.264680  | -2.402217 | 0.660192  |
| 1  | 2.949331  | -2.006563 | 1.396509  |
| 6  | 0.925666  | -2.826762 | 0.895391  |
| 1  | 0.428220  | -2.863499 | 1.854935  |
| 6  | -3.305625 | 0.535399  | 0.232312  |
| 1  | -3.711526 | -0.342481 | -0.269226 |
| 1  | -3.731630 | 0.633221  | 1.234839  |
| 1  | -3.567456 | 1.437760  | -0.330371 |
| 8  | 1.022455  | 0.238561  | -2.072165 |
| 6  | 1.487438  | 1.351680  | -1.770959 |
| 8  | 1.646358  | 2.303596  | -2.649190 |
| 6  | 1.261255  | 2.025714  | -4.010610 |
| 1  | 1.504378  | 2.930864  | -4.563990 |
| 1  | 1.828406  | 1.175423  | -4.393415 |
| 1  | 0.190096  | 1.821275  | -4.059754 |
| 1  | 3.103613  | 3.974799  | 1.742483  |
| 9  | 1.747389  | -0.191665 | 2.728191  |

### 7.3. Mechanism of the Rh-Catalyzed *ortho*-Alkynylation of (Methoxymethyl)benzene

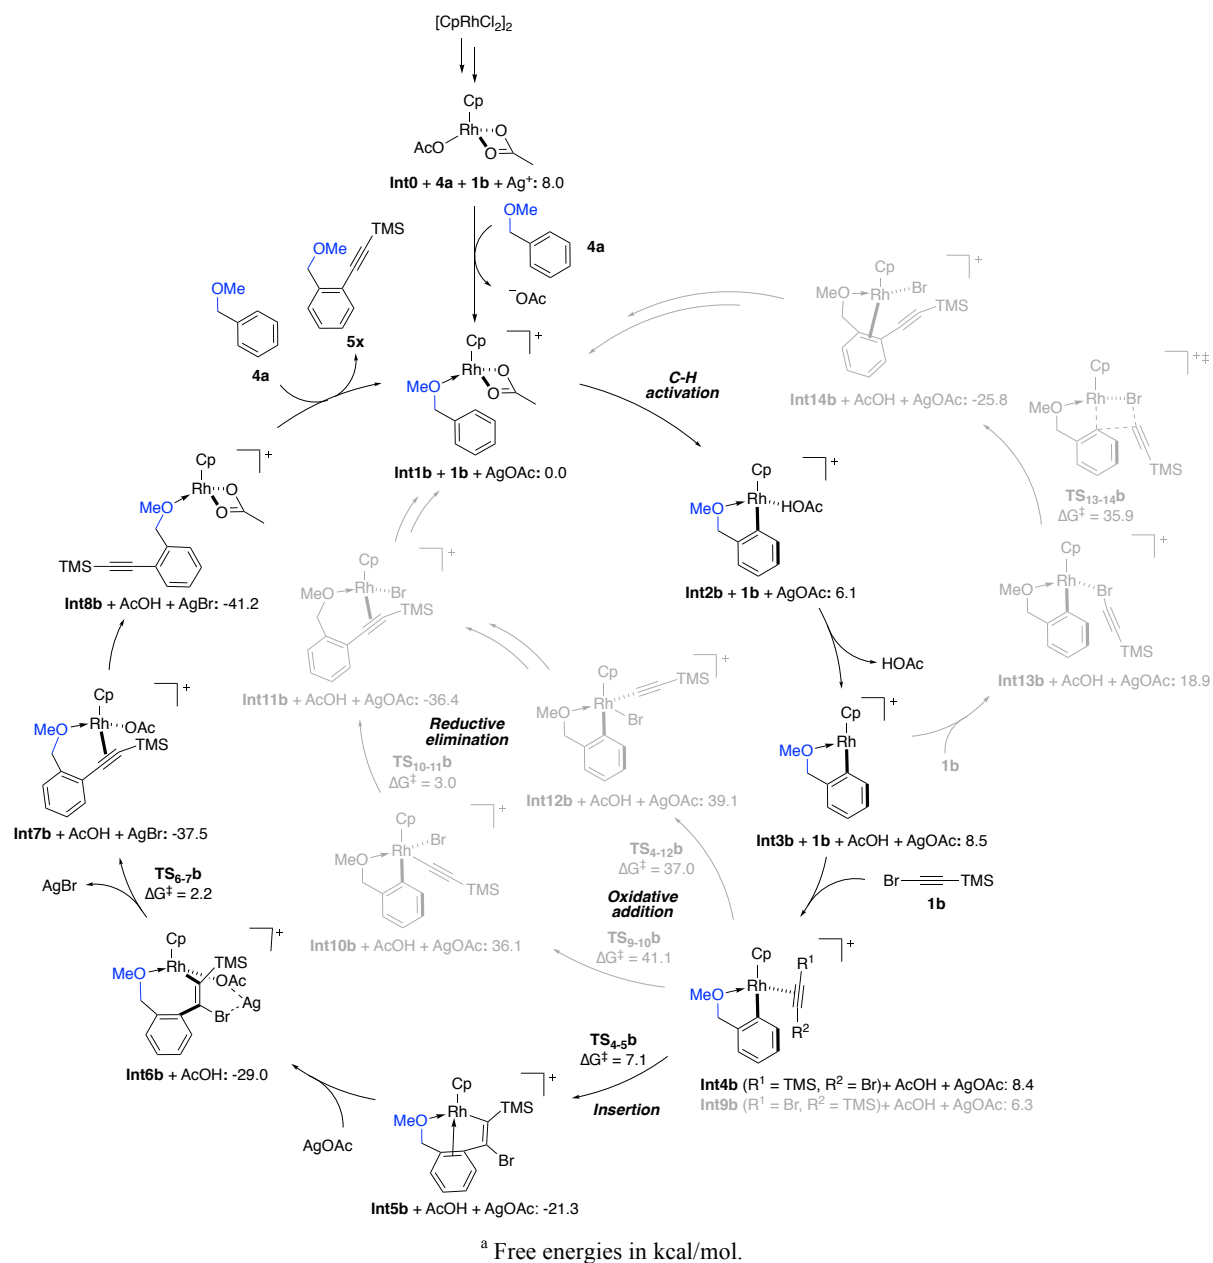

Scheme S7.3.1 - Rh-catalyzed *ortho*-alkynylation of (methoxymethyl)benzene<sup>a</sup>

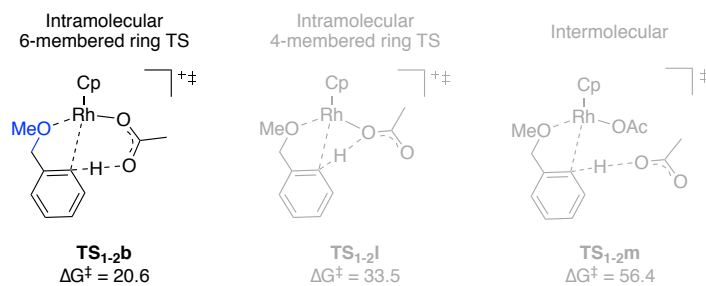

Scheme S7.3.2 - Acetate-assisted C-H activation of (methoxymethyl)benzene

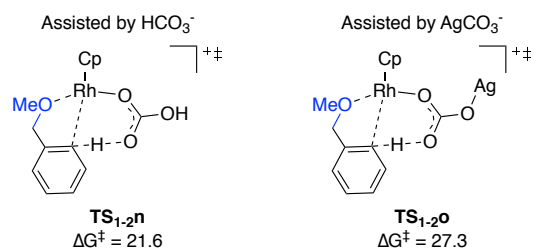

<sup>a</sup> Free energies in kcal/mol.

**Scheme S7.3.3 - Alternative base-assisted C-H activation of (methoxymethyl)benzene**

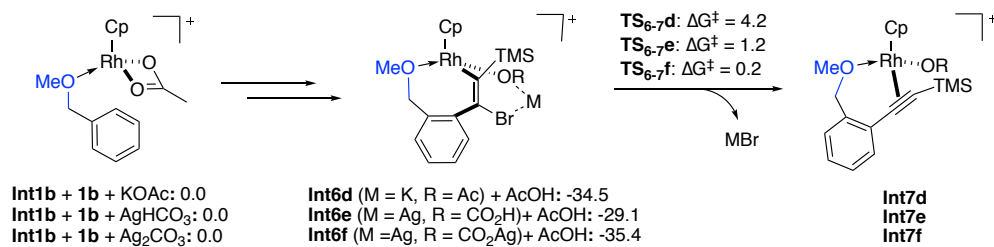

<sup>a</sup> Free energies in kcal/mol.

**Scheme S7.3.4 - Alternative base-assisted bromine elimination**

**4a**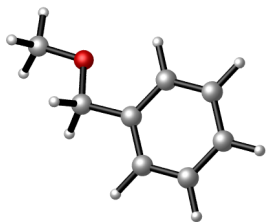

E = -385.953911 Hartrees

G = -385.824823 Hartrees

|   |           |           |           |
|---|-----------|-----------|-----------|
| 6 | 0.839004  | -0.657802 | -0.213877 |
| 6 | 2.179860  | -0.740429 | -0.587346 |
| 6 | 3.006657  | 0.374261  | -0.473161 |
| 6 | 2.504817  | 1.586223  | 0.008904  |
| 6 | 1.161411  | 1.663399  | 0.380316  |
| 6 | 0.334544  | 0.546196  | 0.272980  |
| 1 | 0.193252  | -1.527236 | -0.298530 |
| 1 | 2.584827  | -1.675692 | -0.963820 |
| 1 | 4.054165  | 0.301463  | -0.757595 |
| 1 | 0.767347  | 2.600196  | 0.760718  |
| 1 | -0.708747 | 0.619821  | 0.567648  |
| 6 | 3.405522  | 2.796072  | 0.070425  |
| 1 | 4.428596  | 2.490015  | 0.344645  |
| 1 | 3.473357  | 3.255998  | -0.930985 |
| 8 | 2.905586  | 3.729077  | 0.995466  |
| 6 | 3.671984  | 4.907264  | 1.024630  |
| 1 | 3.667988  | 5.418417  | 0.049425  |
| 1 | 3.227123  | 5.568275  | 1.772850  |
| 1 | 4.717455  | 4.704289  | 1.304076  |

**Int1b**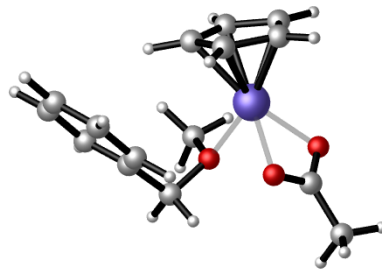

E = -917.233578 Hartrees

G = -916.975643 Hartrees

|    |           |           |           |
|----|-----------|-----------|-----------|
| 6  | 1.620820  | -3.910266 | 2.040745  |
| 1  | 2.484198  | -3.974718 | 2.690721  |
| 6  | 1.527075  | -3.126819 | 0.861381  |
| 1  | 2.290448  | -2.463324 | 0.477751  |
| 6  | 0.252069  | -3.393619 | 0.251174  |
| 1  | -0.109953 | -2.970210 | -0.676372 |
| 6  | 0.432093  | -4.703623 | 2.147726  |
| 1  | 0.209062  | -5.419804 | 2.926681  |
| 6  | -0.425714 | -4.343847 | 1.051637  |
| 1  | -1.383010 | -4.794635 | 0.825780  |
| 45 | 1.413509  | -5.221732 | 0.347265  |
| 8  | 2.879545  | -6.721011 | 0.746703  |
| 8  | 0.942219  | -7.265225 | -0.066288 |
| 6  | 2.116870  | -7.620986 | 0.274352  |
| 6  | 2.590094  | -9.022155 | 0.081357  |
| 1  | 1.751168  | -9.719457 | 0.128757  |
| 1  | 3.050021  | -9.099346 | -0.910675 |
| 1  | 3.341787  | -9.276936 | 0.831115  |
| 8  | 2.322324  | -5.327643 | -1.663248 |
| 6  | 3.208010  | -4.243390 | -1.956362 |
| 1  | 3.910447  | -4.178769 | -1.124249 |
| 1  | 3.755415  | -4.463650 | -2.878284 |
| 1  | 2.663749  | -3.299880 | -2.064258 |
| 6  | 1.471203  | -5.731028 | -2.766080 |
| 1  | 2.073902  | -5.674268 | -3.678080 |
| 1  | 1.229258  | -6.774987 | -2.564213 |
| 6  | 0.226252  | -4.895269 | -2.859636 |
| 6  | -0.949582 | -5.335365 | -2.245075 |
| 6  | 0.238778  | -3.651587 | -3.498306 |
| 6  | -2.090858 | -4.536928 | -2.249125 |
| 1  | -0.963964 | -6.305499 | -1.755082 |
| 6  | -0.898776 | -2.847022 | -3.495650 |
| 1  | 1.140399  | -3.314485 | -4.003490 |
| 6  | -2.063293 | -3.287258 | -2.866936 |
| 1  | -3.000267 | -4.889361 | -1.771204 |
| 1  | -0.879823 | -1.881293 | -3.991821 |
| 1  | -2.951084 | -2.661495 | -2.868463 |

TS<sub>1-2b</sub>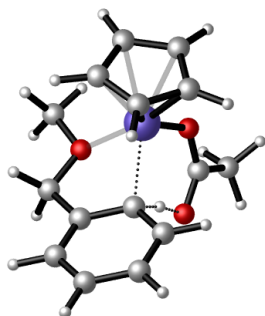

E = -917.194578 Hartrees

G = -916.942813 Hartrees

|    |           |           |           |
|----|-----------|-----------|-----------|
| 8  | -1.452374 | 1.346628  | 0.475439  |
| 6  | -2.044652 | 0.296914  | 0.107403  |
| 8  | -1.447776 | -0.782218 | -0.194436 |
| 6  | 1.847520  | 1.681959  | -0.356980 |
| 6  | 1.134014  | 0.976240  | 0.636167  |
| 6  | 2.911330  | 2.510266  | -0.010040 |
| 6  | 1.533986  | 1.118461  | 1.979195  |
| 6  | 3.278884  | 2.639338  | 1.327309  |
| 6  | 2.593839  | 1.944580  | 2.327080  |
| 1  | -0.164592 | 1.066221  | 0.526044  |
| 1  | 3.459124  | 3.047950  | -0.779664 |
| 1  | 0.985045  | 0.587187  | 2.752318  |
| 1  | 4.109369  | 3.287030  | 1.592811  |
| 1  | 2.887638  | 2.055164  | 3.366313  |
| 45 | 0.639396  | -0.971084 | -0.224112 |
| 6  | 2.441540  | -2.078651 | -0.721550 |
| 1  | 3.189780  | -1.698976 | -1.405048 |
| 6  | 1.298656  | -2.887968 | -1.083149 |
| 1  | 1.042341  | -3.211293 | -2.083276 |
| 6  | 0.560761  | -3.140852 | 0.090868  |
| 1  | -0.384531 | -3.664457 | 0.146534  |
| 6  | 2.402796  | -1.857668 | 0.674676  |
| 1  | 3.107184  | -1.266953 | 1.244394  |
| 6  | 1.201132  | -2.460902 | 1.184110  |
| 1  | 0.874263  | -2.463783 | 2.214872  |
| 6  | -3.544028 | 0.301211  | -0.006432 |
| 1  | -3.956178 | -0.606022 | 0.442328  |
| 1  | -3.967401 | 1.185859  | 0.470637  |
| 1  | -3.811986 | 0.301788  | -1.068645 |
| 6  | 1.470345  | 1.497554  | -1.800698 |
| 1  | 2.350899  | 1.221558  | -2.395954 |
| 1  | 1.037108  | 2.410246  | -2.227867 |
| 8  | 0.496417  | 0.453281  | -1.883175 |
| 6  | 0.252282  | -0.000186 | -3.213123 |
| 1  | 1.154334  | -0.457583 | -3.635217 |
| 1  | -0.552656 | -0.733077 | -3.155798 |
| 1  | -0.062056 | 0.845499  | -3.833764 |

Int2b

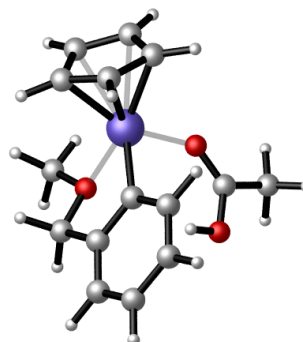

E = -917.223158 Hartrees

G = -916.965866 Hartrees

|    |           |           |           |
|----|-----------|-----------|-----------|
| 8  | -1.282786 | 1.680502  | 0.587773  |
| 6  | -1.890573 | 0.545697  | 0.323192  |
| 8  | -1.297918 | -0.495453 | 0.034325  |
| 6  | 1.915539  | 1.641119  | -0.468977 |
| 6  | 1.556618  | 0.666856  | 0.478541  |
| 6  | 2.464651  | 2.856378  | -0.057253 |
| 6  | 1.752080  | 0.935432  | 1.837186  |
| 6  | 2.667299  | 3.105994  | 1.297312  |
| 6  | 2.305997  | 2.149469  | 2.244173  |
| 1  | -0.309800 | 1.550229  | 0.554060  |
| 1  | 2.732398  | 3.606401  | -0.797021 |
| 1  | 1.465667  | 0.199423  | 2.583487  |
| 1  | 3.096169  | 4.051730  | 1.614368  |
| 1  | 2.453957  | 2.346720  | 3.302030  |
| 45 | 0.803750  | -1.044038 | -0.292764 |
| 6  | 2.465933  | -2.321840 | -0.675339 |
| 1  | 3.346336  | -2.006487 | -1.219877 |
| 6  | 1.353655  | -3.086045 | -1.228012 |
| 1  | 1.221887  | -3.327210 | -2.274778 |
| 6  | 0.448668  | -3.332514 | -0.208124 |
| 1  | -0.519625 | -3.804924 | -0.306584 |
| 6  | 2.274159  | -2.228956 | 0.734712  |
| 1  | 2.946259  | -1.762139 | 1.441396  |
| 6  | 0.972632  | -2.730744 | 1.012343  |
| 1  | 0.499850  | -2.769141 | 1.984893  |
| 6  | -3.377534 | 0.615952  | 0.429370  |
| 1  | -3.827456 | -0.295975 | 0.038056  |
| 1  | -3.646631 | 0.735148  | 1.484660  |
| 1  | -3.751192 | 1.490153  | -0.110036 |
| 6  | 1.695086  | 1.323454  | -1.918107 |
| 1  | 2.604481  | 0.916817  | -2.382001 |
| 1  | 1.367329  | 2.196103  | -2.493632 |
| 8  | 0.664826  | 0.323989  | -1.972098 |
| 6  | 0.463185  | -0.207775 | -3.282089 |
| 1  | 1.368574  | -0.713190 | -3.635621 |
| 1  | -0.363951 | -0.914846 | -3.215575 |
| 1  | 0.199435  | 0.606172  | -3.965220 |

TS<sub>1-2l</sub>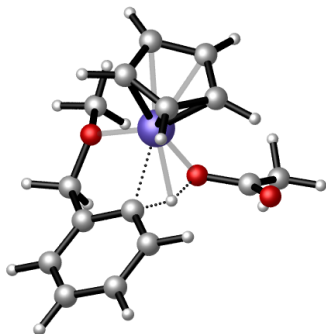

E = -917.172819 Hartrees

G = -916.922228 Hartrees

|    |           |           |           |
|----|-----------|-----------|-----------|
| 6  | 3.054007  | -4.302280 | 1.833531  |
| 1  | 4.123647  | -4.145271 | 1.848180  |
| 6  | 2.101417  | -3.561671 | 1.033214  |
| 1  | 2.348179  | -2.792933 | 0.313177  |
| 6  | 0.831890  | -4.104933 | 1.264735  |
| 1  | -0.083942 | -3.828526 | 0.758935  |
| 6  | 2.331712  | -5.233755 | 2.633427  |
| 1  | 2.757466  | -5.933172 | 3.340102  |
| 6  | 0.966076  | -5.179222 | 2.228884  |
| 1  | 0.160549  | -5.791460 | 2.611894  |
| 45 | 2.138528  | -5.741201 | 0.550435  |
| 6  | 1.992346  | -8.664315 | 0.125422  |
| 6  | 3.835736  | -8.152954 | 1.623183  |
| 6  | 2.010382  | -9.986573 | 0.555795  |
| 6  | 3.860925  | -9.477848 | 2.041817  |
| 1  | 4.552082  | -7.440160 | 2.020614  |
| 6  | 2.943229  | -10.38643 | 1.511963  |
| 1  | 1.302381  | -10.70431 | 0.151032  |
| 1  | 4.587054  | -9.806244 | 2.778647  |
| 1  | 2.954765  | -11.41983 | 1.845671  |
| 6  | 1.062434  | -8.200164 | -0.954538 |
| 1  | 0.131715  | -8.775960 | -0.981314 |
| 1  | 1.553733  | -8.283986 | -1.932919 |
| 8  | 0.738124  | -6.821847 | -0.714064 |
| 6  | 0.222859  | -6.158233 | -1.872344 |
| 1  | -0.628744 | -6.724121 | -2.262529 |
| 1  | -0.108175 | -5.170249 | -1.551505 |
| 1  | 1.001929  | -6.068694 | -2.635953 |
| 8  | 3.454471  | -6.046621 | -1.241526 |
| 8  | 5.358193  | -5.400026 | -0.231181 |
| 6  | 4.654907  | -5.445028 | -1.219663 |
| 6  | 5.025387  | -4.856709 | -2.554859 |
| 1  | 5.998975  | -4.368441 | -2.494807 |
| 1  | 5.051376  | -5.647204 | -3.311598 |
| 1  | 4.264029  | -4.133206 | -2.863538 |
| 6  | 2.905881  | -7.730754 | 0.660108  |
| 1  | 3.417381  | -6.951960 | -0.333464 |

TS<sub>1-2m</sub>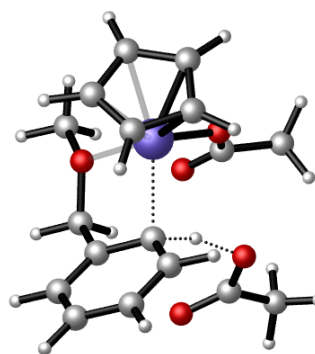

E = -1145.734608 Hartrees

G = -1145.437298 Hartrees

|    |           |           |           |
|----|-----------|-----------|-----------|
| 6  | 2.773773  | -4.296693 | 2.282037  |
| 1  | 3.824463  | -4.150821 | 2.492337  |
| 6  | 1.897282  | -3.346265 | 1.669956  |
| 1  | 2.197919  | -2.394053 | 1.254051  |
| 6  | 0.611253  | -3.930732 | 1.557846  |
| 1  | -0.259259 | -3.478480 | 1.102578  |
| 6  | 1.981891  | -5.450913 | 2.637835  |
| 1  | 2.348459  | -6.350538 | 3.111871  |
| 6  | 0.670920  | -5.237835 | 2.168838  |
| 1  | -0.140480 | -5.952234 | 2.212967  |
| 45 | 2.049924  | -5.145000 | 0.470304  |
| 6  | 2.355260  | -7.943770 | -0.234802 |
| 6  | 4.157121  | -7.357224 | 1.266043  |
| 6  | 2.255051  | -9.188556 | 0.375611  |
| 6  | 4.068591  | -8.605162 | 1.872433  |
| 1  | 4.914707  | -6.651489 | 1.598501  |
| 6  | 3.115460  | -9.519948 | 1.423263  |
| 1  | 1.508939  | -9.903513 | 0.038841  |
| 1  | 4.738380  | -8.871884 | 2.684927  |
| 1  | 3.037212  | -10.49585 | 1.894268  |
| 6  | 1.419153  | -7.514795 | -1.322809 |
| 1  | 0.674707  | -8.282954 | -1.561359 |
| 1  | 1.981725  | -7.228481 | -2.217125 |
| 8  | 0.729846  | -6.360223 | -0.810944 |
| 6  | -0.240422 | -5.820457 | -1.704938 |
| 1  | -1.011586 | -6.577174 | -1.892854 |
| 1  | -0.689737 | -4.961773 | -1.202926 |
| 1  | 0.238650  | -5.507882 | -2.633830 |
| 8  | 2.919630  | -4.012468 | -1.011205 |
| 6  | 2.983531  | -4.189062 | -2.293093 |
| 8  | 2.367513  | -5.017636 | -2.958572 |
| 6  | 3.941409  | -3.210553 | -2.954033 |
| 1  | 3.827361  | -2.204758 | -2.538772 |
| 1  | 4.961339  | -3.550061 | -2.747103 |
| 1  | 3.782415  | -3.187065 | -4.034721 |
| 8  | 4.957983  | -6.015450 | -1.610243 |
| 8  | 4.323912  | -7.844636 | -2.760763 |
| 6  | 4.962559  | -6.793266 | -2.635712 |
| 6  | 5.827999  | -6.303800 | -3.795193 |
| 1  | 6.688823  | -5.726939 | -3.445088 |
| 1  | 6.165278  | -7.144992 | -4.407474 |
| 1  | 5.215876  | -5.649049 | -4.427594 |
| 6  | 3.311431  | -6.995061 | 0.197753  |
| 1  | 3.951544  | -6.374178 | -0.689019 |

Int3b

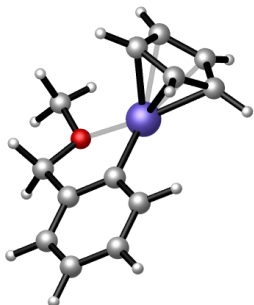

E = -688.181088 Hartrees

G = -687.982112 Hartrees

|    |           |           |           |
|----|-----------|-----------|-----------|
| 6  | 2.804012  | -4.388089 | 2.227063  |
| 1  | 3.802149  | -4.342830 | 2.643117  |
| 6  | 2.290016  | -3.519124 | 1.170285  |
| 1  | 2.874025  | -2.786140 | 0.629504  |
| 6  | 0.977804  | -3.875074 | 0.919680  |
| 1  | 0.336196  | -3.479236 | 0.143845  |
| 6  | 1.745848  | -5.203989 | 2.690481  |
| 1  | 1.784525  | -5.922151 | 3.497974  |
| 6  | 0.643680  | -4.993958 | 1.792564  |
| 1  | -0.318772 | -5.486313 | 1.844408  |
| 45 | 2.246916  | -5.796624 | 0.708832  |
| 6  | 2.275049  | -8.636759 | 0.150980  |
| 6  | 3.392620  | -8.149106 | 2.239868  |
| 6  | 2.620142  | -9.982735 | 0.281156  |
| 6  | 3.739260  | -9.493411 | 2.363913  |
| 1  | 3.705789  | -7.444082 | 3.004903  |
| 6  | 3.348642  | -10.40942 | 1.387665  |
| 1  | 2.319339  | -10.69524 | -0.482826 |
| 1  | 4.315077  | -9.826345 | 3.222832  |
| 1  | 3.615454  | -11.45750 | 1.486211  |
| 6  | 1.461172  | -8.152454 | -1.008518 |
| 1  | 0.389430  | -8.323717 | -0.842341 |
| 1  | 1.748561  | -8.623786 | -1.954189 |
| 8  | 1.678089  | -6.733769 | -1.124680 |
| 6  | 0.744710  | -6.088944 | -1.998345 |
| 1  | -0.258065 | -6.102027 | -1.558792 |
| 1  | 1.089558  | -5.064027 | -2.133968 |
| 1  | 0.739463  | -6.608241 | -2.961320 |
| 6  | 2.663418  | -7.707373 | 1.130723  |

Int4b

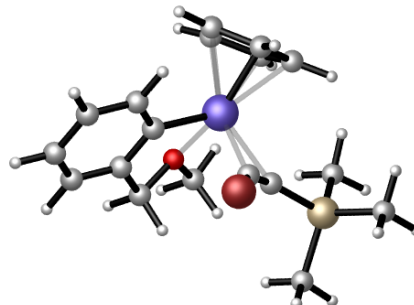

E = -1186.717087 Hartrees

G = -1186.405831 Hartrees

|    |           |           |           |
|----|-----------|-----------|-----------|
| 6  | 2.247958  | -3.468927 | 1.386003  |
| 1  | 3.242022  | -3.094335 | 1.181107  |
| 6  | 1.018761  | -2.977668 | 0.792465  |
| 1  | 0.960009  | -2.244418 | -0.000818 |
| 6  | -0.046366 | -3.688322 | 1.351277  |
| 1  | -1.088971 | -3.603912 | 1.075706  |
| 6  | 1.889887  | -4.398243 | 2.412863  |
| 1  | 2.570632  | -4.920276 | 3.069737  |
| 6  | 0.494731  | -4.606391 | 2.331702  |
| 1  | -0.079873 | -5.300084 | 2.931512  |
| 45 | 1.420738  | -5.182892 | 0.392164  |
| 6  | 2.648897  | -6.794167 | 0.710352  |
| 6  | 2.157035  | -8.010343 | 0.226775  |
| 6  | 3.862777  | -6.765022 | 1.394145  |
| 6  | 2.866763  | -9.190657 | 0.451836  |
| 6  | 4.571243  | -7.946655 | 1.611342  |
| 1  | 4.278430  | -5.827855 | 1.751578  |
| 6  | 4.074415  | -9.160304 | 1.142301  |
| 1  | 2.471675  | -10.13246 | 0.079136  |
| 1  | 5.514670  | -7.913492 | 2.149056  |
| 1  | 4.622631  | -10.08125 | 1.316495  |
| 6  | 0.879344  | -7.999676 | -0.552273 |
| 1  | 0.294472  | -8.914683 | -0.409617 |
| 1  | 1.059224  | -7.859840 | -1.627693 |
| 8  | 0.120217  | -6.884947 | -0.066151 |
| 6  | -1.152435 | -6.755857 | -0.692128 |
| 1  | -1.715942 | -7.682985 | -0.543570 |
| 1  | -1.668978 | -5.930946 | -0.202448 |
| 1  | -1.042904 | -6.563689 | -1.764061 |
| 6  | 1.511809  | -4.798911 | -1.793006 |
| 6  | 2.650640  | -5.150788 | -1.410844 |
| 35 | 4.430952  | -5.413797 | -1.748523 |
| 14 | 0.320014  | -4.000485 | -3.011340 |
| 6  | -1.243859 | -3.420512 | -2.163586 |
| 1  | -1.025265 | -2.738543 | -1.334855 |
| 1  | -1.850640 | -2.866533 | -2.891453 |
| 1  | -1.856621 | -4.244439 | -1.786930 |
| 6  | 1.289407  | -2.542661 | -3.684632 |
| 1  | 2.238780  | -2.867626 | -4.125614 |
| 1  | 0.713860  | -2.029987 | -4.465371 |
| 1  | 1.513038  | -1.813526 | -2.897336 |
| 6  | -0.007072 | -5.275522 | -4.345369 |
| 1  | -0.516034 | -6.165650 | -3.959154 |
| 1  | -0.639176 | -4.843320 | -5.131027 |
| 1  | 0.931243  | -5.598503 | -4.811183 |



TS4-5b

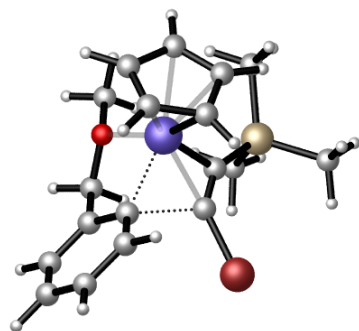

E = -1186.707528 Hartrees

G = -1186.394512 Hartrees

|    |           |           |           |
|----|-----------|-----------|-----------|
| 6  | 2.095478  | -3.436370 | 1.548199  |
| 1  | 3.082222  | -3.036266 | 1.353989  |
| 6  | 0.868892  | -2.972867 | 0.944646  |
| 1  | 0.795486  | -2.227525 | 0.164529  |
| 6  | -0.176242 | -3.753586 | 1.460165  |
| 1  | -1.218629 | -3.697984 | 1.176488  |
| 6  | 1.758943  | -4.402543 | 2.560849  |
| 1  | 2.459645  | -4.927094 | 3.195627  |
| 6  | 0.381852  | -4.647064 | 2.463796  |
| 1  | -0.178363 | -5.379452 | 3.030475  |
| 45 | 1.300632  | -5.109227 | 0.472541  |
| 6  | 2.718336  | -6.660303 | 0.362351  |
| 6  | 2.166152  | -7.887479 | -0.031108 |
| 6  | 3.928311  | -6.627341 | 1.061593  |
| 6  | 2.841488  | -9.071982 | 0.267146  |
| 6  | 4.588070  | -7.813063 | 1.358507  |
| 1  | 4.361283  | -5.677974 | 1.361187  |
| 6  | 4.052527  | -9.035718 | 0.948759  |
| 1  | 2.408910  | -10.02278 | -0.031899 |
| 1  | 5.525265  | -7.783983 | 1.906150  |
| 1  | 4.574998  | -9.960808 | 1.171994  |
| 6  | 0.837279  | -7.878855 | -0.711816 |
| 1  | 0.333930  | -8.848583 | -0.647463 |
| 1  | 0.920808  | -7.588861 | -1.769601 |
| 8  | 0.050811  | -6.894846 | -0.023753 |
| 6  | -1.269384 | -6.769684 | -0.546217 |
| 1  | -1.791647 | -7.725539 | -0.431485 |
| 1  | -1.775273 | -6.001646 | 0.038630  |
| 1  | -1.247281 | -6.490037 | -1.604325 |
| 6  | 1.512824  | -4.899760 | -1.605701 |
| 6  | 2.652033  | -5.322320 | -1.223254 |
| 35 | 4.423404  | -5.229641 | -1.803248 |
| 14 | 0.463776  | -4.102409 | -2.939338 |
| 6  | -1.077990 | -3.363712 | -2.171484 |
| 1  | -0.835222 | -2.520984 | -1.514346 |
| 1  | -1.738262 | -2.985172 | -2.962091 |
| 1  | -1.644009 | -4.099832 | -1.591243 |
| 6  | 1.530530  | -2.765267 | -3.711830 |
| 1  | 2.425237  | -3.188941 | -4.182031 |
| 1  | 0.968078  | -2.228511 | -4.486140 |
| 1  | 1.856513  | -2.032882 | -2.964154 |
| 6  | 0.063959  | -5.446458 | -4.186470 |
| 1  | -0.629284 | -6.195951 | -3.788767 |
| 1  | -0.401621 | -5.005818 | -5.077026 |
| 1  | 0.976072  | -5.962782 | -4.508259 |

Int5b

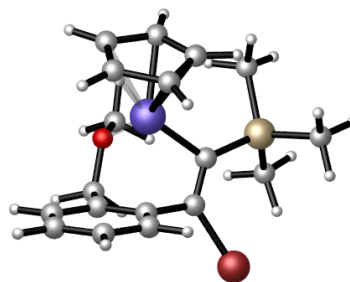

E = -1186.767805 Hartrees

G = -1186.453093 Hartrees

|    |           |           |           |
|----|-----------|-----------|-----------|
| 6  | 2.175229  | -3.861431 | 1.605309  |
| 1  | 3.225589  | -3.638274 | 1.470962  |
| 6  | 1.096893  | -3.246975 | 0.914868  |
| 1  | 1.176674  | -2.494806 | 0.142477  |
| 6  | -0.097001 | -3.897648 | 1.352171  |
| 1  | -1.099201 | -3.692674 | 0.999538  |
| 6  | 1.624309  | -4.758840 | 2.612992  |
| 1  | 2.208619  | -5.371798 | 3.286598  |
| 6  | 0.245423  | -4.777823 | 2.462981  |
| 1  | -0.453540 | -5.404420 | 3.000946  |
| 45 | 1.167066  | -5.353285 | 0.455319  |
| 6  | 2.975892  | -6.793851 | -0.555083 |
| 6  | 2.165848  | -7.812814 | 0.005273  |
| 6  | 4.233576  | -6.523237 | 0.021322  |
| 6  | 2.634391  | -8.530946 | 1.114132  |
| 6  | 4.677404  | -7.246521 | 1.114527  |
| 1  | 4.855173  | -5.745078 | -0.411602 |
| 6  | 3.877453  | -8.256518 | 1.661028  |
| 1  | 2.011113  | -9.314789 | 1.534043  |
| 1  | 5.649630  | -7.031373 | 1.546264  |
| 1  | 4.230609  | -8.825671 | 2.515061  |
| 6  | 0.808631  | -8.115204 | -0.572010 |
| 1  | 0.440774  | -9.093516 | -0.248928 |
| 1  | 0.819747  | -8.079047 | -1.666810 |
| 8  | -0.079349 | -7.102818 | -0.068208 |
| 6  | -1.301177 | -7.000129 | -0.796762 |
| 1  | -1.824252 | -7.961366 | -0.760016 |
| 1  | -1.900188 | -6.234375 | -0.303576 |
| 1  | -1.108872 | -6.721415 | -1.838806 |
| 6  | 1.475451  | -5.163651 | -1.562658 |
| 6  | 2.485834  | -6.007256 | -1.726518 |
| 35 | 3.431419  | -6.337864 | -3.395599 |
| 14 | 0.569454  | -4.036735 | -2.774921 |
| 6  | -0.991591 | -3.353676 | -1.976312 |
| 1  | -0.780417 | -2.598524 | -1.211501 |
| 1  | -1.606576 | -2.869728 | -2.745789 |
| 1  | -1.597715 | -4.145087 | -1.520948 |
| 6  | 1.725107  | -2.623737 | -3.227933 |
| 1  | 2.636828  | -2.993693 | -3.710931 |
| 1  | 1.234342  | -1.929802 | -3.921646 |
| 1  | 2.022608  | -2.053267 | -2.339440 |
| 6  | 0.063579  | -5.022740 | -4.296432 |
| 1  | -0.502893 | -5.921614 | -4.023813 |
| 1  | -0.579467 | -4.406476 | -4.937753 |
| 1  | 0.926511  | -5.338210 | -4.891243 |

Int6b

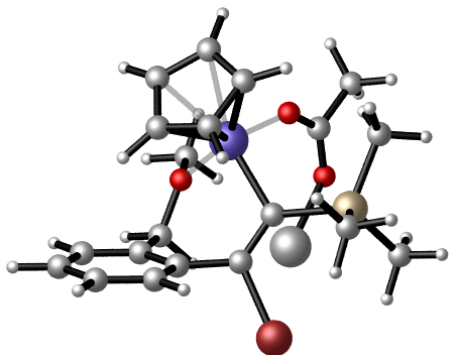

|    |           |           |           |
|----|-----------|-----------|-----------|
| 1  | -1.333786 | -0.912330 | 3.623546  |
| 1  | -1.030599 | 0.583285  | 2.736859  |
| 8  | -0.130015 | -1.133262 | 1.970847  |
| 6  | 1.014362  | -1.248878 | 2.817631  |
| 1  | 1.763280  | -1.821552 | 2.272264  |
| 1  | 1.416743  | -0.261140 | 3.068343  |
| 1  | 0.735357  | -1.782069 | 3.732848  |
| 45 | 0.117987  | -1.309790 | -0.289049 |

E = -1561.006941 Hartrees

G = -1560.648051 Hartrees

|    |           |           |           |
|----|-----------|-----------|-----------|
| 6  | -2.762750 | -0.100206 | 0.617511  |
| 6  | -4.547079 | -2.019514 | 1.621564  |
| 6  | -1.833822 | 0.856438  | -0.058782 |
| 6  | -0.664355 | 0.577703  | -0.678898 |
| 6  | -2.489396 | -0.743091 | 1.835109  |
| 1  | -3.173548 | -2.191238 | 3.262897  |
| 6  | -3.390760 | -1.696473 | 2.320158  |
| 6  | -3.933045 | -0.429982 | -0.079400 |
| 6  | -4.815317 | -1.382898 | 0.411426  |
| 1  | -5.234040 | -2.761249 | 2.016698  |
| 1  | -5.711512 | -1.626268 | -0.150951 |
| 1  | -4.147683 | 0.061103  | -1.023839 |
| 6  | 0.303437  | -2.330819 | -2.136836 |
| 6  | -1.088785 | -2.168631 | -1.848015 |
| 6  | 0.850608  | -3.280001 | -1.180896 |
| 1  | -1.792336 | -1.562224 | -2.402511 |
| 1  | 1.884653  | -3.595355 | -1.139037 |
| 6  | -1.344668 | -2.854012 | -0.632787 |
| 1  | -2.293559 | -2.901477 | -0.115682 |
| 6  | -0.145168 | -3.589450 | -0.263342 |
| 1  | -0.035075 | -4.197356 | 0.624989  |
| 1  | 0.828650  | -1.933566 | -2.993053 |
| 14 | 0.050476  | 1.578149  | -2.166709 |
| 35 | -2.773429 | 2.606893  | -0.315216 |
| 6  | 1.592256  | 0.793044  | -2.907263 |
| 1  | 1.336443  | 0.051340  | -3.671497 |
| 1  | 2.240674  | 0.316828  | -2.168010 |
| 1  | 2.167457  | 1.581934  | -3.409233 |
| 6  | -1.285771 | 1.516607  | -3.489509 |
| 1  | -2.205653 | 2.037752  | -3.208684 |
| 1  | -1.539660 | 0.473697  | -3.717273 |
| 1  | -0.907302 | 1.972302  | -4.413354 |
| 6  | 0.532333  | 3.341644  | -1.698921 |
| 1  | 0.773766  | 3.884777  | -2.622723 |
| 1  | 1.440385  | 3.352282  | -1.080631 |
| 1  | -0.251896 | 3.904786  | -1.184391 |
| 8  | 2.141868  | -0.597847 | -0.024843 |
| 6  | 2.858653  | 0.309759  | 0.495010  |
| 8  | 2.460813  | 1.325477  | 1.121633  |
| 47 | 0.303407  | 1.809363  | 1.105044  |
| 6  | 4.352112  | 0.155563  | 0.299244  |
| 1  | 4.630093  | -0.897055 | 0.216167  |
| 1  | 4.627711  | 0.657364  | -0.636145 |
| 1  | 4.900337  | 0.631616  | 1.114865  |
| 6  | -1.238265 | -0.491832 | 2.617201  |

TS<sub>6-7b</sub>

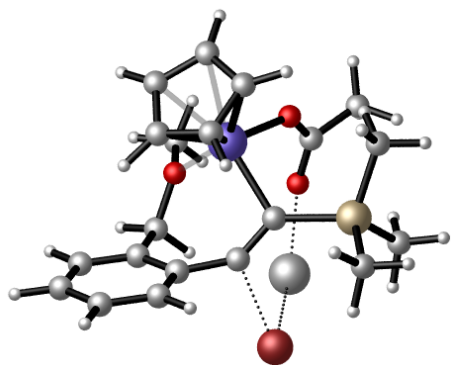

|    |           |           |           |
|----|-----------|-----------|-----------|
| 1  | -1.287470 | -0.926652 | 3.571769  |
| 1  | -0.934291 | 0.510331  | 2.602528  |
| 8  | -0.137679 | -1.267653 | 1.902360  |
| 6  | 0.995242  | -1.436489 | 2.753711  |
| 1  | 1.768992  | -1.934687 | 2.170009  |
| 1  | 1.364577  | -0.466435 | 3.098644  |
| 1  | 0.715537  | -2.063569 | 3.608059  |
| 45 | 0.171230  | -1.477233 | -0.343310 |

E = -1561.00179 Hartrees

G = -1560.644501 Hartrees

|    |           |           |           |
|----|-----------|-----------|-----------|
| 6  | -2.711836 | -0.202693 | 0.547902  |
| 6  | -4.653965 | -1.852446 | 1.683219  |
| 6  | -1.680198 | 0.576018  | -0.139552 |
| 6  | -0.604046 | 0.425188  | -0.841884 |
| 6  | -2.485075 | -0.773619 | 1.810382  |
| 1  | -3.287305 | -2.057822 | 3.330445  |
| 6  | -3.463640 | -1.603232 | 2.359326  |
| 6  | -3.908322 | -0.456077 | -0.132418 |
| 6  | -4.876479 | -1.275221 | 0.433886  |
| 1  | -5.405002 | -2.497147 | 2.128820  |
| 1  | -5.801982 | -1.465740 | -0.100327 |
| 1  | -4.070435 | -0.007913 | -1.108100 |
| 6  | 0.472340  | -2.637932 | -2.096633 |
| 6  | -0.937369 | -2.483928 | -1.889130 |
| 6  | 0.993586  | -3.454699 | -1.021678 |
| 1  | -1.619580 | -1.939622 | -2.528111 |
| 1  | 2.030749  | -3.733644 | -0.891690 |
| 6  | -1.250246 | -3.071435 | -0.637057 |
| 1  | -2.222986 | -3.083921 | -0.163299 |
| 6  | -0.052059 | -3.711017 | -0.129766 |
| 1  | 0.030460  | -4.218711 | 0.822331  |
| 1  | 1.034508  | -2.298365 | -2.954128 |
| 14 | 0.170675  | 1.490064  | -2.221652 |
| 35 | -2.408501 | 2.762873  | 0.134402  |
| 6  | 1.425600  | 0.490132  | -3.193836 |
| 1  | 0.938540  | -0.267533 | -3.817301 |
| 1  | 2.155437  | -0.000686 | -2.543247 |
| 1  | 1.967323  | 1.164311  | -3.869477 |
| 6  | -1.250223 | 1.928267  | -3.371654 |
| 1  | -1.980834 | 2.587809  | -2.892406 |
| 1  | -1.775193 | 1.025038  | -3.706044 |
| 1  | -0.864300 | 2.437983  | -4.263635 |
| 6  | 1.025798  | 3.048535  | -1.601775 |
| 1  | 1.483246  | 3.540585  | -2.470692 |
| 1  | 1.831386  | 2.841437  | -0.888140 |
| 1  | 0.331473  | 3.770185  | -1.156562 |
| 8  | 2.060107  | -0.548268 | -0.144412 |
| 6  | 2.490901  | 0.467636  | 0.492760  |
| 8  | 1.845449  | 1.187042  | 1.287209  |
| 47 | -0.010853 | 2.446257  | 1.375543  |
| 6  | 3.939141  | 0.818055  | 0.219950  |
| 1  | 4.515781  | -0.064717 | -0.064313 |
| 1  | 3.966176  | 1.528179  | -0.615922 |
| 1  | 4.387870  | 1.302075  | 1.090154  |
| 6  | -1.197668 | -0.556355 | 2.545113  |

Int7b

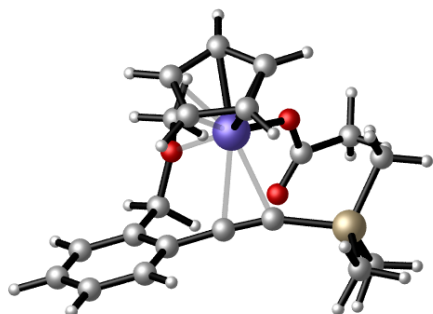

|    |          |           |           |
|----|----------|-----------|-----------|
| 1  | 1.664750 | -2.518315 | 2.087565  |
| 1  | 1.544870 | -0.880356 | 2.800150  |
| 1  | 0.691801 | -2.263013 | 3.564286  |
| 45 | 0.223340 | -1.674276 | -0.397002 |

E = -1401.989703 Hartrees

G = -1401.626971 Hartrees

|    |           |           |           |
|----|-----------|-----------|-----------|
| 6  | -2.668559 | -0.503996 | 0.464936  |
| 6  | -4.734774 | -1.403489 | 2.089535  |
| 6  | -1.601348 | -0.064072 | -0.383520 |
| 6  | -0.740679 | 0.381873  | -1.145191 |
| 6  | -2.407142 | -0.792418 | 1.817150  |
| 1  | -3.265453 | -1.471783 | 3.661208  |
| 6  | -3.453904 | -1.246122 | 2.615598  |
| 6  | -3.951715 | -0.674118 | -0.069491 |
| 6  | -4.983906 | -1.117408 | 0.748679  |
| 1  | -5.539461 | -1.753017 | 2.728856  |
| 1  | -5.980801 | -1.241734 | 0.338058  |
| 1  | -4.128833 | -0.453038 | -1.117209 |
| 6  | 1.073079  | -2.851197 | -1.980282 |
| 6  | -0.283035 | -2.556530 | -2.295353 |
| 6  | 1.087345  | -3.599033 | -0.758260 |
| 1  | -0.622012 | -1.959769 | -3.131633 |
| 1  | 1.963898  | -3.969179 | -0.244223 |
| 6  | -1.123476 | -3.153072 | -1.292596 |
| 1  | -2.201640 | -3.088310 | -1.240911 |
| 6  | -0.276500 | -3.803060 | -0.363074 |
| 1  | -0.598907 | -4.285736 | 0.550760  |
| 1  | 1.939725  | -2.499981 | -2.524262 |
| 14 | 0.121688  | 1.477885  | -2.404561 |
| 6  | 1.558104  | 0.543610  | -3.159462 |
| 1  | 1.203130  | -0.315593 | -3.740846 |
| 1  | 2.245752  | 0.177307  | -2.391332 |
| 1  | 2.114174  | 1.199812  | -3.840373 |
| 6  | -1.191142 | 1.833620  | -3.696835 |
| 1  | -2.072649 | 2.310449  | -3.253064 |
| 1  | -1.516939 | 0.916848  | -4.202216 |
| 1  | -0.792563 | 2.513202  | -4.460607 |
| 6  | 0.647869  | 3.038680  | -1.514109 |
| 1  | 1.264628  | 3.665596  | -2.169903 |
| 1  | 1.217789  | 2.814520  | -0.607222 |
| 1  | -0.230905 | 3.623760  | -1.217489 |
| 8  | 1.999822  | -0.660440 | -0.146349 |
| 6  | 2.159366  | 0.460422  | 0.494103  |
| 8  | 1.307819  | 1.034116  | 1.167624  |
| 6  | 3.542125  | 1.054230  | 0.299822  |
| 1  | 4.311374  | 0.278167  | 0.277811  |
| 1  | 3.563935  | 1.576092  | -0.665064 |
| 1  | 3.757866  | 1.777051  | 1.089427  |
| 6  | -1.026639 | -0.614836 | 2.375028  |
| 1  | -1.041037 | -0.780188 | 3.456256  |
| 1  | -0.609761 | 0.372646  | 2.159434  |
| 8  | -0.134291 | -1.595500 | 1.795943  |
| 6  | 1.017613  | -1.819805 | 2.617429  |

Int8b

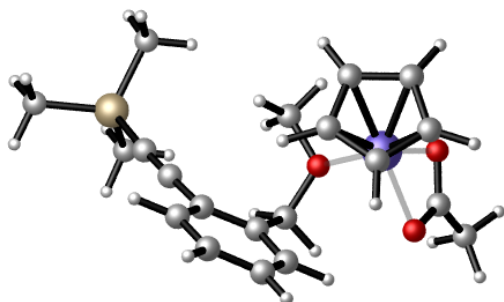

|   |          |           |           |
|---|----------|-----------|-----------|
| 6 | 3.636131 | -0.919408 | -6.973627 |
| 1 | 3.190082 | -0.029984 | -6.513486 |
| 1 | 4.558263 | -0.608140 | -7.479845 |
| 1 | 2.942166 | -1.288414 | -7.737722 |

E = -1401.992141 Hartrees

G = -1401.632981 Hartrees

|    |           |           |           |
|----|-----------|-----------|-----------|
| 6  | 1.526955  | -3.804770 | 2.052885  |
| 1  | 2.350942  | -3.857870 | 2.753213  |
| 6  | 1.500896  | -3.039306 | 0.858042  |
| 1  | 2.283227  | -2.378781 | 0.509170  |
| 6  | 0.262892  | -3.320009 | 0.179998  |
| 1  | -0.047435 | -2.913202 | -0.773474 |
| 6  | 0.335370  | -4.599739 | 2.103749  |
| 1  | 0.070097  | -5.305769 | 2.878757  |
| 6  | -0.457647 | -4.260949 | 0.954066  |
| 1  | -1.399151 | -4.717247 | 0.678164  |
| 45 | 1.418630  | -5.137678 | 0.367802  |
| 8  | 2.878998  | -6.617781 | 0.846394  |
| 8  | 0.986544  | -7.186615 | -0.049501 |
| 6  | 2.152289  | -7.526501 | 0.335786  |
| 6  | 2.658744  | -8.916368 | 0.148217  |
| 1  | 1.832827  | -9.630429 | 0.162580  |
| 1  | 3.151671  | -8.975375 | -0.829133 |
| 1  | 3.391041  | -9.162822 | 0.919590  |
| 8  | 2.408441  | -5.269708 | -1.600384 |
| 6  | 3.374777  | -4.237561 | -1.829609 |
| 1  | 4.020773  | -4.217889 | -0.950338 |
| 1  | 3.967958  | -4.490866 | -2.713133 |
| 1  | 2.894818  | -3.265366 | -1.968223 |
| 6  | 1.629557  | -5.674442 | -2.752668 |
| 1  | 2.274440  | -5.587124 | -3.631390 |
| 1  | 1.405198  | -6.727561 | -2.579617 |
| 6  | 0.352793  | -4.891120 | -2.903193 |
| 6  | -0.803983 | -5.366288 | -2.283132 |
| 6  | 0.292961  | -3.674136 | -3.613887 |
| 6  | -1.994059 | -4.646094 | -2.328080 |
| 1  | -0.761788 | -6.313028 | -1.751619 |
| 6  | -0.907004 | -2.948165 | -3.649354 |
| 6  | -2.040401 | -3.428172 | -3.003314 |
| 1  | -2.882044 | -5.035753 | -1.839825 |
| 1  | -0.942393 | -2.010686 | -4.195114 |
| 1  | -2.963546 | -2.858153 | -3.040746 |
| 6  | 1.438419  | -3.176268 | -4.315881 |
| 6  | 2.428553  | -2.775216 | -4.899230 |
| 14 | 4.010407  | -2.240653 | -5.695536 |
| 6  | 5.117594  | -1.570816 | -4.332216 |
| 1  | 6.076867  | -1.237096 | -4.747251 |
| 1  | 4.655851  | -0.714110 | -3.827361 |
| 1  | 5.329765  | -2.335914 | -3.575652 |
| 6  | 4.778014  | -3.758007 | -6.493373 |
| 1  | 4.116948  | -4.184260 | -7.256975 |
| 1  | 5.727723  | -3.499465 | -6.977871 |
| 1  | 4.982656  | -4.538386 | -5.750713 |

5x

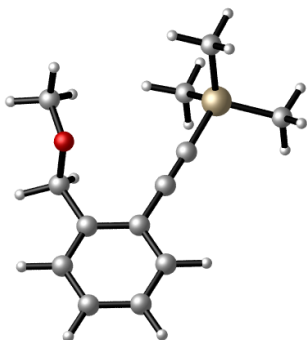

E = -870.712250 Hartrees

G = -870.482376 Hartrees

|    |           |           |           |
|----|-----------|-----------|-----------|
| 6  | 0.959414  | -0.725074 | -0.165994 |
| 6  | 2.349888  | -0.714572 | -0.127141 |
| 6  | 3.047411  | 0.500479  | -0.121511 |
| 6  | 2.338733  | 1.719898  | -0.153483 |
| 6  | 0.947394  | 1.686948  | -0.189970 |
| 6  | 0.256484  | 0.476222  | -0.198304 |
| 1  | 0.427826  | -1.671781 | -0.171184 |
| 1  | 2.905183  | -1.647254 | -0.104015 |
| 1  | 0.397632  | 2.624379  | -0.210951 |
| 1  | -0.829139 | 0.472927  | -0.228032 |
| 6  | 3.086507  | 3.027277  | -0.136345 |
| 1  | 3.869818  | 3.018270  | -0.910984 |
| 1  | 2.403681  | 3.859195  | -0.367390 |
| 8  | 3.669564  | 3.201775  | 1.137459  |
| 6  | 4.637677  | 4.220342  | 1.140798  |
| 1  | 4.210099  | 5.193672  | 0.853566  |
| 1  | 5.031501  | 4.293942  | 2.158002  |
| 1  | 5.466881  | 3.990288  | 0.453101  |
| 6  | 4.480998  | 0.501605  | -0.096686 |
| 6  | 5.698526  | 0.520516  | -0.090442 |
| 14 | 7.543009  | 0.601966  | -0.071823 |
| 6  | 8.077009  | 1.865164  | -1.356327 |
| 1  | 7.632061  | 2.847689  | -1.159326 |
| 1  | 9.167768  | 1.984338  | -1.349112 |
| 1  | 7.780190  | 1.558376  | -2.366207 |
| 6  | 8.086284  | 1.133002  | 1.646227  |
| 1  | 7.762006  | 0.412650  | 2.406150  |
| 1  | 9.179524  | 1.209102  | 1.699259  |
| 1  | 7.666890  | 2.111255  | 1.909313  |
| 6  | 8.217877  | -1.100388 | -0.490297 |
| 1  | 7.885881  | -1.428898 | -1.482188 |
| 1  | 9.315118  | -1.090708 | -0.490219 |
| 1  | 7.889986  | -1.849301 | 0.240079  |

Int9b

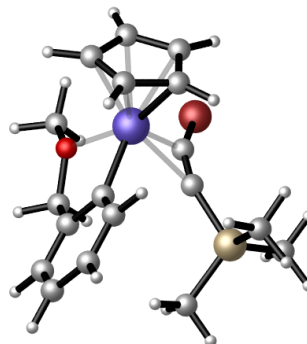

E = -1186.718858 Hartrees

G = -1186.409151 Hartrees

|    |           |           |           |
|----|-----------|-----------|-----------|
| 6  | 2.245635  | -3.457464 | 1.459812  |
| 1  | 3.255123  | -3.095428 | 1.317994  |
| 6  | 1.066988  | -2.966470 | 0.771734  |
| 1  | 1.070805  | -2.234716 | -0.025457 |
| 6  | -0.041798 | -3.668635 | 1.254626  |
| 1  | -1.061407 | -3.579315 | 0.904326  |
| 6  | 1.808336  | -4.374443 | 2.467268  |
| 1  | 2.437245  | -4.897667 | 3.173228  |
| 6  | 0.422404  | -4.577021 | 2.284940  |
| 1  | -0.198694 | -5.261086 | 2.848415  |
| 45 | 1.461938  | -5.168825 | 0.418248  |
| 6  | 2.658578  | -6.791831 | 0.804518  |
| 6  | 2.180698  | -8.005941 | 0.299488  |
| 6  | 3.811317  | -6.782466 | 1.588443  |
| 6  | 2.852259  | -9.195685 | 0.582679  |
| 6  | 4.483118  | -7.974206 | 1.864705  |
| 1  | 4.202682  | -5.853007 | 1.989995  |
| 6  | 4.005506  | -9.182136 | 1.361711  |
| 1  | 2.467796  | -10.13382 | 0.190270  |
| 1  | 5.380184  | -7.953596 | 2.477131  |
| 1  | 4.524583  | -10.11072 | 1.578828  |
| 6  | 0.952509  | -7.987535 | -0.555806 |
| 1  | 0.349113  | -8.894058 | -0.438769 |
| 1  | 1.198029  | -7.862130 | -1.619924 |
| 8  | 0.179249  | -6.858675 | -0.128556 |
| 6  | -1.072285 | -6.741969 | -0.801545 |
| 1  | -1.694704 | -7.605560 | -0.544880 |
| 1  | -1.546608 | -5.827642 | -0.445845 |
| 1  | -0.931290 | -6.702132 | -1.886768 |
| 6  | 1.636796  | -4.796502 | -1.684497 |
| 6  | 2.796973  | -5.178108 | -1.416015 |
| 35 | 0.384474  | -4.123138 | -2.842129 |
| 14 | 4.607805  | -5.474447 | -1.821760 |
| 6  | 5.655786  | -4.512132 | -0.605052 |
| 1  | 6.712218  | -4.586341 | -0.892305 |
| 1  | 5.387036  | -3.449457 | -0.608776 |
| 1  | 5.563728  | -4.893073 | 0.416327  |
| 6  | 4.751595  | -4.750492 | -3.548742 |
| 1  | 5.772563  | -4.877587 | -3.930281 |
| 1  | 4.068896  | -5.248468 | -4.247111 |
| 1  | 4.521301  | -3.678841 | -3.554539 |
| 6  | 4.976772  | -7.307556 | -1.839839 |
| 1  | 5.977923  | -7.467731 | -2.260246 |
| 1  | 4.957352  | -7.746621 | -0.838354 |
| 1  | 4.263370  | -7.850081 | -2.470518 |

TS<sub>9-10b</sub>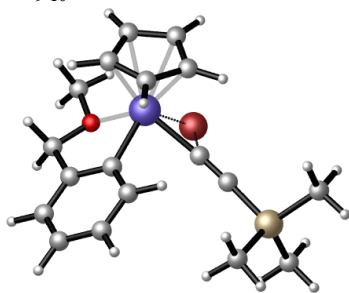

E = -1186.651651 Hartrees

G = -1186.343551 Hartrees

|    |           |           |           |
|----|-----------|-----------|-----------|
| 45 | 0.271096  | 0.935013  | -0.350668 |
| 6  | -0.343695 | 2.809666  | -0.961434 |
| 6  | -0.359931 | 3.947316  | -0.163623 |
| 6  | -0.693281 | 2.886411  | -2.309959 |
| 6  | -0.741876 | 5.170680  | -0.708902 |
| 1  | -0.093045 | 3.885131  | 0.885050  |
| 6  | -1.094797 | 4.115133  | -2.843106 |
| 6  | -1.117164 | 5.254643  | -2.048379 |
| 1  | -0.753438 | 6.054692  | -0.077711 |
| 1  | -1.383899 | 4.170601  | -3.889452 |
| 1  | -1.428540 | 6.204370  | -2.472028 |
| 6  | -0.581996 | 1.675977  | -3.177093 |
| 1  | 0.358102  | 1.679639  | -3.745966 |
| 1  | -1.416640 | 1.583130  | -3.879984 |
| 8  | -0.590536 | 0.536617  | -2.306710 |
| 6  | -0.288470 | -0.687512 | -2.983257 |
| 1  | 0.719677  | -0.647398 | -3.409510 |
| 1  | -1.027654 | -0.843868 | -3.774292 |
| 1  | -0.363590 | -1.490838 | -2.250548 |
| 6  | 1.780086  | 0.837684  | 1.223740  |
| 1  | 1.521858  | 0.978401  | 2.264558  |
| 6  | 2.129159  | 1.872527  | 0.306184  |
| 6  | 1.958218  | -0.441620 | 0.564372  |
| 1  | 2.154139  | 2.931831  | 0.517086  |
| 6  | 2.332687  | 1.253144  | -0.957606 |
| 1  | 1.791786  | -1.409569 | 1.017454  |
| 6  | 2.269706  | -0.187787 | -0.768055 |
| 1  | 2.573970  | 1.761214  | -1.882457 |
| 1  | 2.389588  | -0.926659 | -1.549607 |
| 35 | -1.612504 | -0.639762 | 0.380782  |
| 6  | -1.065984 | 1.357852  | 1.187935  |
| 6  | -1.511458 | 1.995512  | 2.135274  |
| 14 | -2.180798 | 3.030418  | 3.507471  |
| 6  | -4.004737 | 2.632407  | 3.717318  |
| 1  | -4.432207 | 3.216170  | 4.542138  |
| 1  | -4.569754 | 2.871787  | 2.808753  |
| 1  | -4.159905 | 1.570387  | 3.940323  |
| 6  | -1.954813 | 4.839078  | 3.047312  |
| 1  | -2.393943 | 5.484592  | 3.818513  |
| 1  | -0.894948 | 5.104081  | 2.955765  |
| 1  | -2.449152 | 5.070603  | 2.096820  |
| 6  | -1.217582 | 2.608775  | 5.065745  |
| 1  | -1.336896 | 1.551728  | 5.331160  |
| 1  | -0.146596 | 2.807920  | 4.940312  |
| 1  | -1.573579 | 3.208799  | 5.912320  |

Int10b

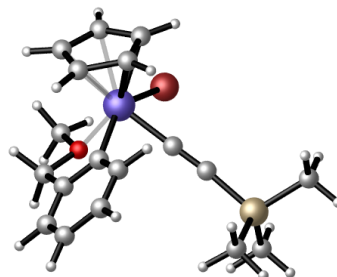

E = -1186.670104 Hartrees

G = -1186.361553 Hartrees

|    |           |           |           |
|----|-----------|-----------|-----------|
| 45 | 0.547722  | 0.863806  | -0.142987 |
| 6  | 0.035992  | 2.831168  | -0.787600 |
| 6  | 0.343624  | 4.012123  | -0.126208 |
| 6  | -0.672539 | 2.818934  | -1.979967 |
| 6  | -0.071631 | 5.218377  | -0.681494 |
| 1  | 0.868454  | 4.008750  | 0.821031  |
| 6  | -1.094277 | 4.040953  | -2.516281 |
| 6  | -0.792321 | 5.234062  | -1.875302 |
| 1  | 0.157599  | 6.145515  | -0.165338 |
| 1  | -1.661805 | 4.041035  | -3.442773 |
| 1  | -1.126141 | 6.175369  | -2.299727 |
| 6  | -0.946014 | 1.533142  | -2.677925 |
| 1  | -0.164050 | 1.303024  | -3.414563 |
| 1  | -1.914858 | 1.539508  | -3.186274 |
| 8  | -0.964596 | 0.494541  | -1.684167 |
| 6  | -1.075082 | -0.797241 | -2.305421 |
| 1  | -0.148981 | -1.044007 | -2.835601 |
| 1  | -1.914363 | -0.769190 | -3.005967 |
| 1  | -1.273079 | -1.523298 | -1.522225 |
| 6  | 2.379338  | 0.289140  | 0.860340  |
| 1  | 2.368383  | -0.118782 | 1.861888  |
| 6  | 2.442536  | 1.664771  | 0.524336  |
| 6  | 2.391755  | -0.474103 | -0.380579 |
| 1  | 2.480307  | 2.488233  | 1.223924  |
| 6  | 2.460441  | 1.755264  | -0.913569 |
| 1  | 2.346144  | -1.551526 | -0.456407 |
| 6  | 2.453380  | 0.429191  | -1.449135 |
| 1  | 2.537353  | 2.665512  | -1.490611 |
| 1  | 2.430880  | 0.177923  | -2.501133 |
| 35 | -0.358552 | -1.260220 | 0.984674  |
| 6  | -0.629410 | 1.666850  | 1.225576  |
| 6  | -1.322118 | 2.179195  | 2.090239  |
| 14 | -2.378155 | 3.103711  | 3.281418  |
| 6  | -4.128942 | 2.427242  | 3.189831  |
| 1  | -4.779696 | 2.944041  | 3.906289  |
| 1  | -4.557896 | 2.561308  | 2.189676  |
| 1  | -4.153384 | 1.356619  | 3.424827  |
| 6  | -2.339038 | 4.914490  | 2.770665  |
| 1  | -2.982057 | 5.519285  | 3.422717  |
| 1  | -1.323823 | 5.324740  | 2.832170  |
| 1  | -2.692085 | 5.041469  | 1.740413  |
| 6  | -1.681571 | 2.889335  | 5.013875  |
| 1  | -1.676206 | 1.834455  | 5.312881  |
| 1  | -0.654008 | 3.265769  | 5.083137  |
| 1  | -2.288968 | 3.441233  | 5.742185  |

TS<sub>10-11b</sub>

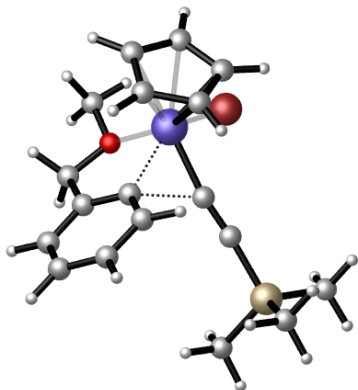

E = -1186.668836 Hartrees  
G = -1186.356866 Hartrees

|    |           |           |           |
|----|-----------|-----------|-----------|
| 45 | 0.257314  | 0.873088  | -0.268613 |
| 6  | 0.258114  | 2.995346  | -0.637996 |
| 6  | 0.847421  | 3.964265  | 0.171619  |
| 6  | -0.187530 | 3.290154  | -1.920146 |
| 6  | 0.982194  | 5.258620  | -0.310328 |
| 1  | 1.161683  | 3.731695  | 1.180974  |
| 6  | -0.052308 | 4.606506  | -2.381627 |
| 6  | 0.523684  | 5.585101  | -1.587902 |
| 1  | 1.433531  | 6.015070  | 0.323985  |
| 1  | -0.400427 | 4.844816  | -3.383241 |
| 1  | 0.619788  | 6.599248  | -1.961795 |
| 6  | -0.727302 | 2.245848  | -2.838177 |
| 1  | -0.043958 | 2.104163  | -3.685147 |
| 1  | -1.717062 | 2.504848  | -3.228403 |
| 8  | -0.842809 | 1.007571  | -2.124403 |
| 6  | -0.878956 | -0.116233 | -3.016637 |
| 1  | 0.082870  | -0.218882 | -3.529989 |
| 1  | -1.681898 | 0.043311  | -3.742088 |
| 1  | -1.095940 | -0.999540 | -2.420089 |
| 6  | 2.012735  | 1.055022  | 0.989338  |
| 1  | 2.042211  | 1.758463  | 1.810112  |
| 6  | 2.454833  | 1.285714  | -0.360723 |
| 6  | 1.529984  | -0.276651 | 1.060682  |
| 1  | 2.886807  | 2.200221  | -0.742158 |
| 6  | 2.273417  | 0.080682  | -1.101922 |
| 1  | 1.133059  | -0.761282 | 1.942083  |
| 6  | 1.677353  | -0.871948 | -0.255482 |
| 1  | 2.474427  | -0.043411 | -2.157945 |
| 1  | 1.386527  | -1.876841 | -0.528225 |
| 35 | -1.483951 | -0.938196 | 0.306802  |
| 6  | -1.013468 | 2.011110  | 0.761698  |
| 6  | -1.799502 | 2.570149  | 1.512776  |
| 14 | -2.903652 | 3.571303  | 2.595426  |
| 6  | -1.800017 | 4.645719  | 3.674195  |
| 1  | -1.157645 | 5.290131  | 3.061958  |
| 1  | -2.404292 | 5.292078  | 4.322863  |
| 1  | -1.154181 | 4.035743  | 4.317058  |
| 6  | -3.958709 | 2.433505  | 3.652745  |
| 1  | -4.592431 | 1.787743  | 3.033628  |
| 1  | -3.339796 | 1.790096  | 4.289203  |
| 1  | -4.614776 | 3.021599  | 4.306605  |
| 6  | -3.980628 | 4.640630  | 1.487887  |
| 1  | -4.631580 | 5.285195  | 2.091711  |
| 1  | -3.369143 | 5.285658  | 0.845821  |
| 1  | -4.620061 | 4.027952  | 0.841610  |

Int11b

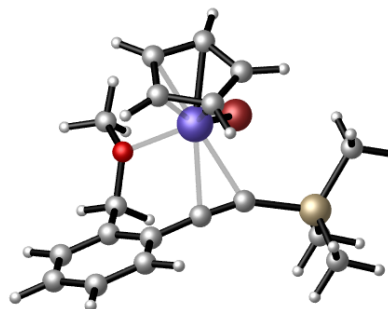

E = -1186.786991 Hartrees  
G = -1186.477124 Hartrees

|    |           |           |           |
|----|-----------|-----------|-----------|
| 45 | 0.055828  | 1.199614  | 0.304724  |
| 6  | -0.295558 | 4.119714  | -1.068017 |
| 6  | 0.363244  | 5.338594  | -0.864637 |
| 6  | -0.406793 | 3.567671  | -2.357645 |
| 6  | 0.901758  | 6.015598  | -1.952338 |
| 1  | 0.440680  | 5.747010  | 0.137850  |
| 6  | 0.150234  | 4.255639  | -3.431208 |
| 6  | 0.794518  | 5.475366  | -3.232794 |
| 1  | 1.405093  | 6.964997  | -1.800632 |
| 1  | 0.073760  | 3.835907  | -4.430135 |
| 1  | 1.219110  | 6.002648  | -4.081291 |
| 6  | -1.073461 | 2.237844  | -2.542751 |
| 1  | -1.175928 | 2.014637  | -3.608123 |
| 1  | -2.065246 | 2.198586  | -2.077187 |
| 8  | -0.246191 | 1.219238  | -1.943110 |
| 6  | -0.412777 | -0.052415 | -2.581543 |
| 1  | -0.084841 | 0.033077  | -3.622683 |
| 1  | -1.455270 | -0.379153 | -2.536649 |
| 1  | 0.217456  | -0.768332 | -2.054824 |
| 6  | 1.615636  | 1.975042  | 1.600327  |
| 1  | 1.525737  | 2.950800  | 2.059595  |
| 6  | 2.194399  | 1.702437  | 0.335643  |
| 6  | 1.058997  | 0.757379  | 2.118851  |
| 1  | 2.650795  | 2.423387  | -0.329093 |
| 6  | 2.034207  | 0.296182  | 0.079422  |
| 1  | 0.552761  | 0.637119  | 3.066069  |
| 6  | 1.363525  | -0.289983 | 1.180839  |
| 1  | 2.333475  | -0.218244 | -0.824754 |
| 1  | 1.077935  | -1.328833 | 1.272725  |
| 35 | -1.958088 | -0.331581 | 0.465598  |
| 6  | -0.865075 | 3.415959  | 0.040111  |
| 6  | -1.422444 | 2.892160  | 1.010578  |
| 14 | -2.616588 | 2.847159  | 2.464880  |
| 6  | -2.021658 | 1.658023  | 3.780622  |
| 1  | -1.056963 | 1.973298  | 4.194705  |
| 1  | -2.745826 | 1.642496  | 4.604844  |
| 1  | -1.928801 | 0.638342  | 3.394063  |
| 6  | -4.310950 | 2.422038  | 1.793436  |
| 1  | -4.618836 | 3.141229  | 1.025708  |
| 1  | -4.324485 | 1.420674  | 1.352416  |
| 1  | -5.053523 | 2.453064  | 2.600621  |
| 6  | -2.577269 | 4.611177  | 3.108265  |
| 1  | -3.272299 | 4.720318  | 3.950317  |
| 1  | -1.578032 | 4.892183  | 3.461065  |
| 1  | -2.877916 | 5.324918  | 2.332682  |



TS4-12b

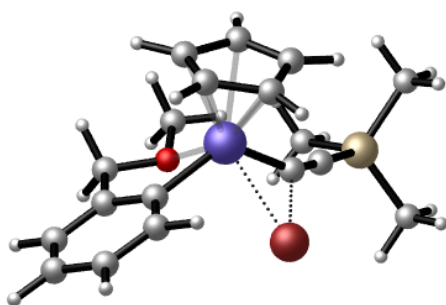

E = -1186.654088 Hartrees  
G = -1186.346826 Hartrees

|    |           |           |           |
|----|-----------|-----------|-----------|
| 45 | 0.362372  | 1.017535  | -0.280109 |
| 6  | 0.516654  | 2.979661  | -0.878558 |
| 6  | 0.985104  | 4.005601  | -0.067127 |
| 6  | 0.100938  | 3.224492  | -2.184627 |
| 6  | 1.038821  | 5.303343  | -0.573503 |
| 1  | 1.307831  | 3.810773  | 0.950770  |
| 6  | 0.147711  | 4.531128  | -2.676858 |
| 6  | 0.620203  | 5.565332  | -1.876554 |
| 1  | 1.405234  | 6.107853  | 0.057120  |
| 1  | -0.189612 | 4.730862  | -3.690373 |
| 1  | 0.656696  | 6.577090  | -2.268164 |
| 6  | -0.358967 | 2.081931  | -3.027606 |
| 1  | 0.464086  | 1.672891  | -3.630040 |
| 1  | -1.178955 | 2.359804  | -3.697507 |
| 8  | -0.826331 | 1.061254  | -2.131921 |
| 6  | -1.117846 | -0.162674 | -2.815066 |
| 1  | -0.223520 | -0.531271 | -3.330104 |
| 1  | -1.919938 | 0.020563  | -3.536362 |
| 1  | -1.452356 | -0.875689 | -2.065098 |
| 6  | -1.324279 | 0.067969  | 0.419982  |
| 6  | -2.110668 | -0.871456 | 0.412993  |
| 14 | -3.289565 | -2.288790 | 0.334668  |
| 6  | -2.379833 | -3.825771 | 0.917805  |
| 1  | -3.050852 | -4.693803 | 0.915727  |
| 1  | -1.995696 | -3.702897 | 1.937353  |
| 1  | -1.531953 | -4.057181 | 0.261879  |
| 6  | -3.838349 | -2.475808 | -1.454234 |
| 1  | -3.005346 | -2.761388 | -2.107564 |
| 1  | -4.266394 | -1.543062 | -1.840088 |
| 1  | -4.606902 | -3.254734 | -1.534919 |
| 6  | -4.761004 | -1.912147 | 1.438261  |
| 1  | -4.453944 | -1.764495 | 2.480150  |
| 1  | -5.484804 | -2.736356 | 1.413556  |
| 1  | -5.277304 | -1.003148 | 1.107634  |
| 35 | -1.189052 | 1.996329  | 1.522781  |
| 6  | 2.007484  | 0.537295  | 1.088072  |
| 1  | 2.047750  | 0.918102  | 2.100358  |
| 6  | 2.578063  | 1.162157  | -0.059682 |
| 6  | 1.482914  | -0.754953 | 0.693644  |
| 1  | 3.088691  | 2.113860  | -0.082390 |
| 6  | 2.236120  | 0.360100  | -1.180278 |
| 1  | 0.998805  | -1.461300 | 1.353560  |
| 6  | 1.600784  | -0.854198 | -0.693943 |
| 1  | 2.474792  | 0.575043  | -2.213995 |
| 1  | 1.225529  | -1.656798 | -1.314792 |

Int12b

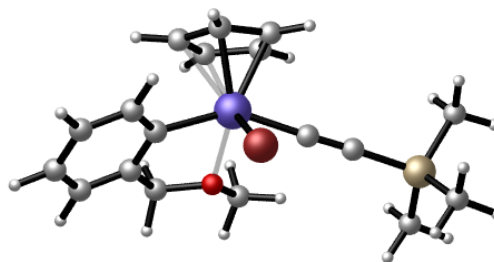

E = -1186.666716 Hartrees  
G = -1186.356805 Hartrees

|    |           |           |           |
|----|-----------|-----------|-----------|
| 45 | 0.187320  | 1.027671  | -0.314950 |
| 6  | 0.578937  | 3.062742  | -0.831875 |
| 6  | 1.049015  | 4.039085  | 0.034555  |
| 6  | 0.269201  | 3.344533  | -2.154189 |
| 6  | 1.212962  | 5.337106  | -0.441426 |
| 1  | 1.281028  | 3.815353  | 1.069101  |
| 6  | 0.419903  | 4.658603  | -2.612056 |
| 6  | 0.896892  | 5.647966  | -1.763270 |
| 1  | 1.581348  | 6.105491  | 0.231429  |
| 1  | 0.159742  | 4.892282  | -3.640773 |
| 1  | 1.015904  | 6.662986  | -2.128843 |
| 6  | -0.196650 | 2.255752  | -3.056134 |
| 1  | 0.645496  | 1.774690  | -3.573163 |
| 1  | -0.909364 | 2.615577  | -3.804539 |
| 8  | -0.858717 | 1.275503  | -2.237587 |
| 6  | -1.209043 | 0.117558  | -3.014283 |
| 1  | -0.304297 | -0.426153 | -3.308586 |
| 1  | -1.753690 | 0.453681  | -3.900992 |
| 1  | -1.849551 | -0.507553 | -2.398632 |
| 6  | -1.242804 | -0.339082 | -0.000443 |
| 6  | -2.054598 | -1.239045 | 0.145552  |
| 14 | -3.306911 | -2.586596 | 0.299766  |
| 6  | -2.420877 | -4.133255 | 0.895640  |
| 1  | -3.133688 | -4.957984 | 1.021090  |
| 1  | -1.928658 | -3.969024 | 1.861551  |
| 1  | -1.658560 | -4.457756 | 0.177312  |
| 6  | -4.053211 | -2.874785 | -1.401198 |
| 1  | -3.293326 | -3.194208 | -2.124112 |
| 1  | -4.531245 | -1.967198 | -1.788103 |
| 1  | -4.818470 | -3.659816 | -1.354637 |
| 6  | -4.626005 | -2.057045 | 1.525614  |
| 1  | -4.200074 | -1.888378 | 2.521722  |
| 1  | -5.398985 | -2.830408 | 1.616327  |
| 1  | -5.114547 | -1.129263 | 1.205705  |
| 35 | -1.356221 | 2.222833  | 1.298542  |
| 6  | 1.945432  | 1.011911  | 0.955109  |
| 1  | 2.040103  | 1.683177  | 1.797939  |
| 6  | 2.439626  | 1.238659  | -0.372262 |
| 6  | 1.321014  | -0.274339 | 0.980957  |
| 1  | 3.007289  | 2.094134  | -0.706882 |
| 6  | 2.095392  | 0.103495  | -1.164420 |
| 1  | 0.859533  | -0.738745 | 1.841728  |
| 6  | 1.420225  | -0.835070 | -0.341162 |
| 1  | 2.287050  | -0.006801 | -2.223991 |
| 1  | 1.021595  | -1.788433 | -0.658284 |

Int13b

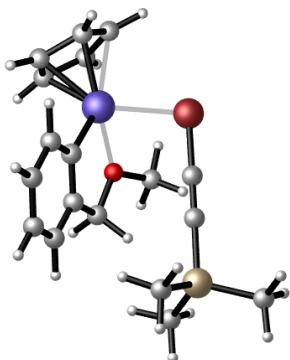

E = -1186.697942 Hartrees

G = -1186.389073 Hartrees

|    |           |           |           |
|----|-----------|-----------|-----------|
| 6  | -1.492050 | -4.739663 | 1.240328  |
| 1  | -2.140133 | -5.372952 | 0.647936  |
| 6  | -1.216124 | -4.905696 | 2.667816  |
| 1  | -1.566477 | -5.725724 | 3.281703  |
| 6  | -0.370660 | -3.883659 | 3.063860  |
| 1  | 0.082215  | -3.760234 | 4.038566  |
| 6  | -0.896739 | -3.527381 | 0.811853  |
| 1  | -0.953579 | -3.094607 | -0.177128 |
| 6  | -0.084582 | -3.059404 | 1.893550  |
| 1  | 0.534038  | -2.171219 | 1.885818  |
| 45 | 0.647603  | -4.945538 | 1.287510  |
| 6  | 1.527266  | -4.796309 | -0.514312 |
| 6  | 2.924571  | -4.680462 | -0.514110 |
| 6  | 0.841425  | -4.803617 | -1.731648 |
| 6  | 3.614343  | -4.550382 | -1.722038 |
| 6  | 1.535926  | -4.696254 | -2.934773 |
| 1  | -0.240260 | -4.905147 | -1.747837 |
| 6  | 2.923263  | -4.557128 | -2.929384 |
| 1  | 4.697225  | -4.449177 | -1.715582 |
| 1  | 0.993110  | -4.713201 | -3.875548 |
| 1  | 3.465921  | -4.457747 | -3.864804 |
| 6  | 3.675716  | -4.747611 | 0.781911  |
| 1  | 4.257247  | -3.839282 | 0.980442  |
| 1  | 4.357665  | -5.605250 | 0.790913  |
| 8  | 2.723086  | -4.914974 | 1.842444  |
| 6  | 3.256634  | -5.530712 | 3.013522  |
| 1  | 4.119643  | -4.956924 | 3.366101  |
| 1  | 2.473428  | -5.519696 | 3.771910  |
| 1  | 3.559496  | -6.561873 | 2.796184  |
| 6  | 2.398179  | -8.005011 | 0.292553  |
| 6  | 3.444120  | -8.188442 | -0.295992 |
| 14 | 5.028450  | -8.473272 | -1.235321 |
| 35 | 0.834674  | -7.726878 | 1.150406  |
| 6  | 4.654838  | -8.190795 | -3.049372 |
| 1  | 4.252140  | -7.185938 | -3.219603 |
| 1  | 5.569911  | -8.296881 | -3.644990 |
| 1  | 3.923520  | -8.916567 | -3.423348 |
| 6  | 6.296058  | -7.251843 | -0.588551 |
| 1  | 5.995494  | -6.215917 | -0.780172 |
| 1  | 6.458803  | -7.372296 | 0.488617  |
| 1  | 7.258221  | -7.415841 | -1.090139 |
| 6  | 5.557449  | -10.24023 | -0.900430 |
| 1  | 5.735440  | -10.41076 | 0.167633  |
| 1  | 4.799797  | -10.95657 | -1.237938 |
| 1  | 6.489816  | -10.46228 | -1.434339 |

TS<sub>13-14b</sub>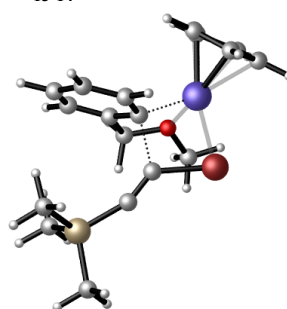

E = -1186.638864 Hartrees

G = -1186.331866 Hartrees

|    |           |           |           |
|----|-----------|-----------|-----------|
| 6  | 0.298126  | -3.672236 | 2.731479  |
| 1  | 0.959527  | -2.864672 | 3.016122  |
| 6  | -0.932035 | -3.533138 | 1.968392  |
| 1  | -1.292359 | -2.617700 | 1.517762  |
| 6  | -1.501433 | -4.798742 | 1.833660  |
| 1  | -2.382564 | -5.048123 | 1.257258  |
| 6  | 0.399906  | -5.030377 | 3.155781  |
| 1  | 1.193996  | -5.454192 | 3.755264  |
| 6  | -0.646477 | -5.752585 | 2.520067  |
| 1  | -0.823127 | -6.817407 | 2.596141  |
| 45 | 0.592725  | -4.879571 | 0.995956  |
| 6  | 2.484462  | -5.746466 | 0.858731  |
| 6  | 2.319615  | -7.100339 | 0.425553  |
| 6  | 3.429831  | -5.478608 | 1.888038  |
| 6  | 3.157168  | -8.090762 | 0.900624  |
| 6  | 4.276948  | -6.472261 | 2.341984  |
| 1  | 3.518110  | -4.466061 | 2.272310  |
| 6  | 4.152955  | -7.768965 | 1.831422  |
| 1  | 3.052617  | -9.113989 | 0.550724  |
| 1  | 5.031766  | -6.253507 | 3.090307  |
| 1  | 4.822359  | -8.548531 | 2.182480  |
| 6  | 1.336237  | -7.356068 | -0.669735 |
| 1  | 0.888827  | -8.353744 | -0.611094 |
| 1  | 1.839951  | -7.252759 | -1.640752 |
| 8  | 0.297152  | -6.372172 | -0.576973 |
| 6  | -0.363426 | -6.105319 | -1.814582 |
| 1  | -0.790770 | -7.034038 | -2.205689 |
| 1  | -1.160894 | -5.392644 | -1.603501 |
| 1  | 0.338980  | -5.682862 | -2.541290 |
| 6  | 3.134108  | -4.802464 | -0.626608 |
| 6  | 4.091689  | -5.065473 | -1.377740 |
| 14 | 5.522022  | -6.000380 | -2.046036 |
| 35 | 1.789924  | -3.342023 | -0.647366 |
| 6  | 6.838718  | -6.167675 | -0.711105 |
| 1  | 6.463949  | -6.740756 | 0.144612  |
| 1  | 7.721050  | -6.685496 | -1.108569 |
| 1  | 7.166128  | -5.188133 | -0.342358 |
| 6  | 4.904162  | -7.699976 | -2.572355 |
| 1  | 4.482120  | -8.248076 | -1.721872 |
| 1  | 4.134306  | -7.628731 | -3.350001 |
| 1  | 5.730450  | -8.297086 | -2.978599 |
| 6  | 6.253200  | -5.106298 | -3.531417 |
| 1  | 5.512774  | -4.982035 | -4.330689 |
| 1  | 6.619786  | -4.110132 | -3.255601 |
| 1  | 7.099567  | -5.670791 | -3.942918 |

**Int14b**

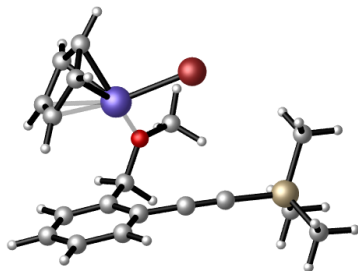

E = -1186.769571 Hartrees  
G = -1186.460327 Hartrees

|    |           |           |           |
|----|-----------|-----------|-----------|
| 6  | 0.493188  | -3.420406 | 2.344137  |
| 1  | 1.207959  | -2.684605 | 2.687317  |
| 6  | -0.514374 | -3.222081 | 1.363001  |
| 1  | -0.701730 | -2.312805 | 0.807728  |
| 6  | -1.189738 | -4.480028 | 1.173585  |
| 1  | -1.966507 | -4.674038 | 0.445013  |
| 6  | 0.395379  | -4.784887 | 2.805229  |
| 1  | 1.065096  | -5.254467 | 3.514516  |
| 6  | -0.646699 | -5.426775 | 2.100687  |
| 1  | -0.932021 | -6.466182 | 2.187321  |
| 45 | 0.857164  | -4.685373 | 0.681264  |
| 6  | 3.418923  | -6.831645 | 1.346901  |
| 6  | 2.178043  | -7.505418 | 1.292334  |
| 6  | 4.017018  | -6.586728 | 2.590980  |
| 6  | 1.597054  | -7.961342 | 2.473557  |
| 6  | 3.414016  | -7.036618 | 3.760975  |
| 1  | 4.968568  | -6.066254 | 2.628634  |
| 6  | 2.212186  | -7.739902 | 3.703812  |
| 1  | 0.652651  | -8.496398 | 2.427100  |
| 1  | 3.894235  | -6.852908 | 4.717028  |
| 1  | 1.750471  | -8.108972 | 4.614206  |
| 6  | 1.505035  | -7.725987 | -0.030637 |
| 1  | 0.607488  | -8.343560 | 0.077262  |
| 1  | 2.187787  | -8.210109 | -0.737934 |
| 8  | 1.127207  | -6.456410 | -0.596447 |
| 6  | 1.009323  | -6.488328 | -2.019545 |
| 1  | 0.346305  | -7.309458 | -2.311908 |
| 1  | 0.581226  | -5.538905 | -2.336334 |
| 1  | 1.998683  | -6.619381 | -2.470258 |
| 6  | 4.091700  | -6.467998 | 0.135417  |
| 6  | 4.651285  | -6.211643 | -0.914571 |
| 14 | 5.523919  | -5.901873 | -2.517420 |
| 35 | 1.976064  | -3.245504 | -0.985697 |
| 6  | 7.363584  | -5.780463 | -2.159372 |
| 1  | 7.743526  | -6.702184 | -1.703368 |
| 1  | 7.921849  | -5.611203 | -3.088625 |
| 1  | 7.585966  | -4.950486 | -1.478496 |
| 6  | 5.162099  | -7.366718 | -3.637211 |
| 1  | 5.526900  | -8.303685 | -3.200173 |
| 1  | 4.086692  | -7.476430 | -3.821691 |
| 1  | 5.655202  | -7.235622 | -4.608737 |
| 6  | 4.885765  | -4.313387 | -3.285134 |
| 1  | 3.807281  | -4.363276 | -3.469867 |
| 1  | 5.074889  | -3.449785 | -2.638150 |
| 1  | 5.387468  | -4.135139 | -4.245012 |

**Int1n**

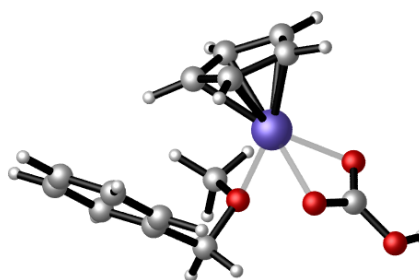

E = -953.139058 Hartrees  
G = -952.903794 Hartrees

|    |           |           |           |
|----|-----------|-----------|-----------|
| 6  | 1.618148  | -3.949278 | 2.047932  |
| 1  | 2.476518  | -4.022529 | 2.703656  |
| 6  | 1.540261  | -3.163255 | 0.867801  |
| 1  | 2.310997  | -2.504334 | 0.491195  |
| 6  | 0.268079  | -3.420642 | 0.247918  |
| 1  | -0.083145 | -2.994457 | -0.682643 |
| 6  | 0.423522  | -4.733027 | 2.144867  |
| 1  | 0.192242  | -5.453052 | 2.917930  |
| 6  | -0.422973 | -4.368185 | 1.042434  |
| 1  | -1.380959 | -4.813023 | 0.807668  |
| 45 | 1.412869  | -5.247085 | 0.345283  |
| 8  | 2.910646  | -6.754975 | 0.717688  |
| 8  | 0.939302  | -7.304132 | -0.076441 |
| 6  | 2.115056  | -7.630614 | 0.262210  |
| 8  | 2.300717  | -5.357500 | -1.672045 |
| 6  | 3.200140  | -4.284154 | -1.964540 |
| 1  | 3.911135  | -4.237026 | -1.138462 |
| 1  | 3.735860  | -4.504619 | -2.893102 |
| 1  | 2.669165  | -3.331766 | -2.059394 |
| 6  | 1.440466  | -5.748056 | -2.772876 |
| 1  | 2.042687  | -5.700811 | -3.685724 |
| 1  | 1.183298  | -6.788174 | -2.570320 |
| 6  | 0.209040  | -4.892574 | -2.863601 |
| 6  | -0.976614 | -5.320301 | -2.259637 |
| 6  | 0.243803  | -3.642896 | -3.490079 |
| 6  | -2.105342 | -4.503931 | -2.260291 |
| 1  | -1.010441 | -6.295594 | -1.781068 |
| 6  | -0.881155 | -2.820945 | -3.484764 |
| 1  | 1.153050  | -3.314454 | -3.987280 |
| 6  | -2.055322 | -3.248856 | -2.865377 |
| 1  | -3.022189 | -4.847210 | -1.790066 |
| 1  | -0.844897 | -1.851059 | -3.971730 |
| 1  | -2.932991 | -2.608998 | -2.864665 |
| 8  | 2.482480  | -8.890703 | 0.122417  |
| 1  | 3.407657  | -8.981964 | 0.413453  |

TS<sub>1-2n</sub>

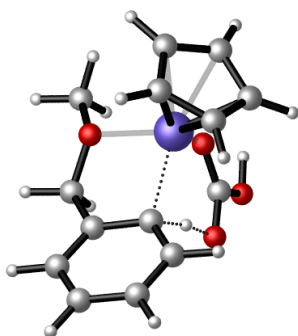

E = -953.101193 Hartrees

G = -952.869429 Hartrees

|    |           |           |           |
|----|-----------|-----------|-----------|
| 8  | -1.250561 | 1.254474  | 0.938203  |
| 6  | -1.851927 | 0.463577  | 0.165515  |
| 8  | -1.316492 | -0.463946 | -0.506763 |
| 6  | 1.780868  | 1.753478  | -0.449118 |
| 6  | 1.328792  | 0.933817  | 0.614288  |
| 6  | 2.813013  | 2.662261  | -0.259238 |
| 6  | 1.956836  | 1.068048  | 1.867072  |
| 6  | 3.408859  | 2.778914  | 0.997813  |
| 6  | 2.982630  | 1.986437  | 2.062209  |
| 1  | 0.023488  | 0.977597  | 0.785940  |
| 1  | 3.157163  | 3.279883  | -1.084022 |
| 1  | 1.602289  | 0.475298  | 2.705688  |
| 1  | 4.211307  | 3.495882  | 1.144193  |
| 1  | 3.447155  | 2.090003  | 3.037863  |
| 45 | 0.742907  | -0.990068 | -0.227150 |
| 6  | 2.502884  | -2.193892 | -0.069232 |
| 1  | 3.496943  | -1.840518 | -0.306951 |
| 6  | 1.598868  | -2.865743 | -0.971732 |
| 1  | 1.776683  | -3.034407 | -2.026152 |
| 6  | 0.411962  | -3.164481 | -0.276945 |
| 1  | -0.478452 | -3.612642 | -0.696818 |
| 6  | 1.871704  | -2.141755 | 1.208214  |
| 1  | 2.287534  | -1.698257 | 2.101921  |
| 6  | 0.555508  | -2.672291 | 1.072375  |
| 1  | -0.190601 | -2.731821 | 1.853651  |
| 6  | 1.105541  | 1.591065  | -1.776658 |
| 1  | 1.650511  | 2.079546  | -2.590364 |
| 1  | 0.083504  | 1.993871  | -1.743856 |
| 8  | 1.043428  | 0.180845  | -2.047624 |
| 6  | 0.234851  | -0.137468 | -3.183991 |
| 1  | 0.621196  | 0.394937  | -4.058655 |
| 1  | 0.317950  | -1.213497 | -3.339660 |
| 1  | -0.808385 | 0.136747  | -3.001518 |
| 8  | -3.166272 | 0.635406  | 0.055084  |
| 1  | -3.510985 | -0.042950 | -0.551271 |

Int1o

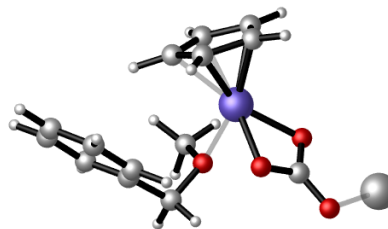

E = -1098.337084 Hartrees

G = -1098.117886 Hartrees

|    |           |           |           |
|----|-----------|-----------|-----------|
| 6  | 1.654961  | -3.938462 | 2.054482  |
| 1  | 2.518947  | -3.993907 | 2.703983  |
| 6  | 1.547753  | -3.159937 | 0.881896  |
| 1  | 2.301617  | -2.489961 | 0.490999  |
| 6  | 0.264209  | -3.434265 | 0.278676  |
| 1  | -0.105236 | -3.010709 | -0.646118 |
| 6  | 0.469781  | -4.746347 | 2.164392  |
| 1  | 0.252435  | -5.457468 | 2.949832  |
| 6  | -0.408043 | -4.377112 | 1.085282  |
| 1  | -1.370205 | -4.823771 | 0.872623  |
| 45 | 1.426967  | -5.276178 | 0.362782  |
| 8  | 2.850706  | -6.763411 | 0.716157  |
| 8  | 0.883476  | -7.224571 | -0.104803 |
| 6  | 2.049519  | -7.684992 | 0.234203  |
| 8  | 2.330861  | -5.352139 | -1.688223 |
| 6  | 3.188796  | -4.247415 | -1.970928 |
| 1  | 3.917146  | -4.201013 | -1.159726 |
| 1  | 3.709876  | -4.420985 | -2.918544 |
| 1  | 2.630366  | -3.306928 | -2.024542 |
| 6  | 1.468737  | -5.744307 | -2.781303 |
| 1  | 2.063392  | -5.695742 | -3.699910 |
| 1  | 1.215484  | -6.784337 | -2.574908 |
| 6  | 0.230424  | -4.895998 | -2.871320 |
| 6  | -0.952376 | -5.330400 | -2.265964 |
| 6  | 0.253671  | -3.649692 | -3.504557 |
| 6  | -2.088534 | -4.525049 | -2.273754 |
| 1  | -0.973916 | -6.300845 | -1.777525 |
| 6  | -0.878752 | -2.837515 | -3.505389 |
| 1  | 1.160044  | -3.315533 | -4.003450 |
| 6  | -2.049963 | -3.272939 | -2.886164 |
| 1  | -3.002758 | -4.874311 | -1.802588 |
| 1  | -0.850603 | -1.869983 | -3.997799 |
| 1  | -2.934133 | -2.641955 | -2.891061 |
| 8  | 2.394608  | -8.878910 | 0.120214  |
| 47 | 4.546573  | -8.795211 | 0.864087  |

TS<sub>1-20</sub>

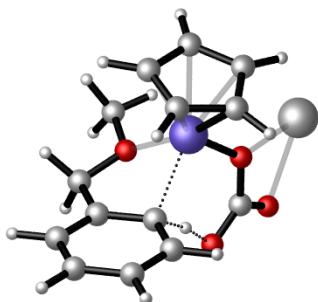

E = -1098.288339 Hartrees  
G = -1098.074333 Hartrees

|    |           |           |           |
|----|-----------|-----------|-----------|
| 8  | -1.514793 | 1.395847  | 0.404199  |
| 6  | -2.110247 | 0.348374  | 0.000551  |
| 8  | -1.424547 | -0.783275 | -0.160086 |
| 6  | 1.823904  | 1.680008  | -0.344561 |
| 6  | 1.069663  | 1.043515  | 0.665899  |
| 6  | 2.967123  | 2.407195  | -0.024728 |
| 6  | 1.510381  | 1.152960  | 1.998897  |
| 6  | 3.373031  | 2.506897  | 1.304464  |
| 6  | 2.648392  | 1.880430  | 2.321327  |
| 1  | -0.195281 | 1.100238  | 0.531551  |
| 1  | 3.546535  | 2.889143  | -0.808103 |
| 1  | 0.934466  | 0.671783  | 2.785201  |
| 1  | 4.266597  | 3.074220  | 1.548862  |
| 1  | 2.974745  | 1.965815  | 3.353367  |
| 45 | 0.617777  | -0.955105 | -0.185126 |
| 6  | 2.433018  | -2.053596 | -0.703852 |
| 1  | 3.163722  | -1.678906 | -1.408492 |
| 6  | 1.276325  | -2.855014 | -1.031730 |
| 1  | 0.998847  | -3.192210 | -2.021775 |
| 6  | 0.565679  | -3.102453 | 0.166090  |
| 1  | -0.376716 | -3.627770 | 0.249223  |
| 6  | 2.417359  | -1.808526 | 0.686295  |
| 1  | 3.128925  | -1.205096 | 1.233620  |
| 6  | 1.229749  | -2.413961 | 1.233715  |
| 1  | 0.926617  | -2.401157 | 2.271630  |
| 6  | 1.393597  | 1.531178  | -1.778673 |
| 1  | 2.251363  | 1.290188  | -2.420351 |
| 1  | 0.923045  | 2.446819  | -2.158025 |
| 8  | 0.437800  | 0.472316  | -1.842741 |
| 6  | 0.097075  | 0.065699  | -3.162345 |
| 1  | 0.965638  | -0.372128 | -3.668561 |
| 1  | -0.698386 | -0.674762 | -3.070072 |
| 1  | -0.268881 | 0.928804  | -3.728274 |
| 8  | -3.345240 | 0.293613  | -0.254178 |
| 47 | -3.426041 | -1.909321 | -0.944847 |

KOAc

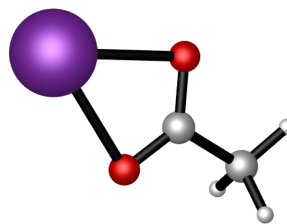

E = -256.633763 Hartrees  
G = -256.615211 Hartrees

|    |           |           |           |
|----|-----------|-----------|-----------|
| 6  | 0.096694  | -0.861685 | -0.680851 |
| 1  | 0.662950  | -1.714709 | -1.071366 |
| 1  | -0.164371 | -0.191538 | -1.504136 |
| 1  | -0.823956 | -1.263279 | -0.240899 |
| 6  | 0.911935  | -0.141882 | 0.399909  |
| 8  | 1.322451  | -0.848588 | 1.361248  |
| 8  | 1.110526  | 1.094891  | 0.261879  |
| 19 | 2.480065  | 1.212570  | 2.503125  |

AgHCO<sub>3</sub>

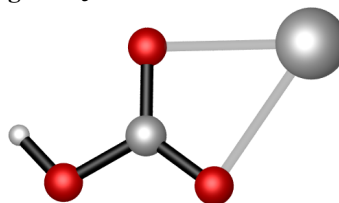

E = -410.109700 Hartrees  
G = -410.112227 Hartrees

|    |           |           |           |
|----|-----------|-----------|-----------|
| 6  | 0.858198  | -0.271812 | 0.393913  |
| 8  | 1.315405  | -0.881007 | 1.389875  |
| 8  | 0.985075  | 0.959587  | 0.146830  |
| 47 | 2.282675  | 1.196824  | 2.130783  |
| 8  | 0.163208  | -1.021587 | -0.498560 |
| 1  | -0.113649 | -0.420974 | -1.207777 |

Ag<sub>2</sub>CO<sub>3</sub>

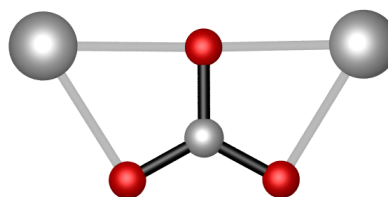

E = -555.284018 Hartrees  
G = -555.302740 Hartrees

|    |           |           |           |
|----|-----------|-----------|-----------|
| 6  | 0.830665  | -0.322676 | 0.359354  |
| 8  | 1.340382  | -0.841462 | 1.412164  |
| 8  | 0.996306  | 0.969707  | 0.147511  |
| 47 | 2.257063  | 1.164772  | 2.113532  |
| 8  | 0.168310  | -1.003800 | -0.497633 |
| 47 | -0.224982 | 0.829977  | -1.851324 |

Int6d

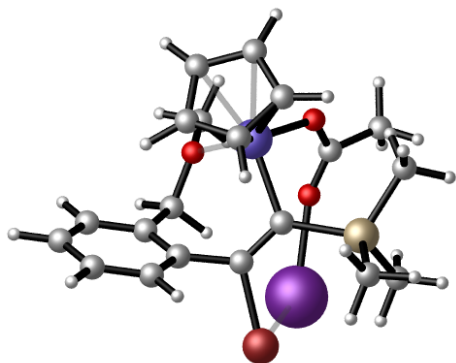

|    |           |           |           |
|----|-----------|-----------|-----------|
| 1  | -0.703444 | 0.568878  | 2.301866  |
| 8  | -0.111410 | -1.352431 | 1.908092  |
| 6  | 1.036562  | -1.535247 | 2.734615  |
| 1  | 1.723223  | -2.185537 | 2.193755  |
| 1  | 1.518195  | -0.575857 | 2.943771  |
| 1  | 0.729882  | -2.016186 | 3.670376  |
| 45 | 0.110864  | -1.453132 | -0.337862 |
| 19 | 0.121290  | 3.095883  | 1.598194  |

E = -1443.448507 Hartrees

G = -1443.089301 Hartrees

|    |           |           |           |
|----|-----------|-----------|-----------|
| 6  | -2.725016 | -0.145285 | 0.587616  |
| 6  | -4.495252 | -1.917485 | 1.843958  |
| 6  | -1.784321 | 0.726396  | -0.164006 |
| 6  | -0.622298 | 0.443832  | -0.740859 |
| 6  | -2.394759 | -0.702436 | 1.830752  |
| 1  | -3.019018 | -2.025380 | 3.402495  |
| 6  | -3.285278 | -1.589036 | 2.443236  |
| 6  | -3.950142 | -0.473168 | -0.006255 |
| 6  | -4.826992 | -1.355118 | 0.611367  |
| 1  | -5.176783 | -2.605998 | 2.333912  |
| 1  | -5.768179 | -1.603948 | 0.130653  |
| 1  | -4.208131 | -0.037385 | -0.967195 |
| 6  | 0.223586  | -2.459788 | -2.206304 |
| 6  | -1.160331 | -2.294904 | -1.869825 |
| 6  | 0.793123  | -3.419926 | -1.277649 |
| 1  | -1.875651 | -1.674381 | -2.392130 |
| 1  | 1.824197  | -3.748213 | -1.273467 |
| 6  | -1.385776 | -2.992492 | -0.659907 |
| 1  | -2.316566 | -3.026814 | -0.109022 |
| 6  | -0.177114 | -3.730317 | -0.329464 |
| 1  | -0.043107 | -4.349495 | 0.547769  |
| 1  | 0.719104  | -2.061804 | -3.079865 |
| 14 | 0.216306  | 1.473738  | -2.112510 |
| 35 | -2.613129 | 2.568881  | -0.328954 |
| 6  | 1.681887  | 0.602363  | -2.916455 |
| 1  | 1.345797  | -0.063355 | -3.719912 |
| 1  | 2.285861  | 0.019441  | -2.217821 |
| 1  | 2.325388  | 1.360399  | -3.381929 |
| 6  | -1.049597 | 1.715875  | -3.488334 |
| 1  | -1.889048 | 2.356779  | -3.203288 |
| 1  | -1.456341 | 0.749707  | -3.812633 |
| 1  | -0.556912 | 2.171968  | -4.356958 |
| 6  | 0.862189  | 3.154663  | -1.533021 |
| 1  | 1.313668  | 3.650816  | -2.401572 |
| 1  | 1.659285  | 3.046273  | -0.787583 |
| 1  | 0.079987  | 3.831527  | -1.170353 |
| 8  | 2.048444  | -0.681376 | -0.062840 |
| 6  | 2.385944  | 0.409447  | 0.516220  |
| 8  | 1.624854  | 1.165571  | 1.145576  |
| 6  | 3.847597  | 0.776903  | 0.351245  |
| 1  | 4.483122  | -0.112171 | 0.355694  |
| 1  | 3.970123  | 1.268781  | -0.622115 |
| 1  | 4.165297  | 1.471004  | 1.132425  |
| 6  | -1.063866 | -0.449433 | 2.470771  |
| 1  | -1.119802 | -0.627367 | 3.549927  |

TS<sub>6-7d</sub>

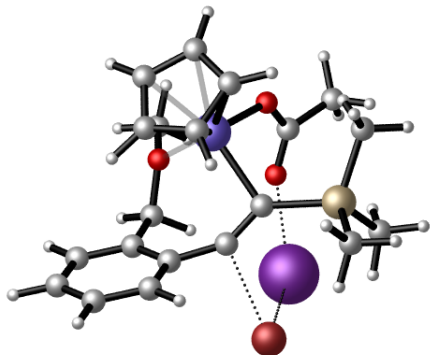

|    |           |           |           |
|----|-----------|-----------|-----------|
| 1  | -0.670605 | 0.486925  | 2.319550  |
| 8  | -0.130203 | -1.437675 | 1.877898  |
| 6  | 1.013484  | -1.657687 | 2.705203  |
| 1  | 1.695053  | -2.302587 | 2.151433  |
| 1  | 1.505890  | -0.710036 | 2.939898  |
| 1  | 0.695848  | -2.157772 | 3.626802  |
| 45 | 0.171161  | -1.539172 | -0.363624 |
| 19 | 0.023344  | 3.063246  | 1.598769  |

E = -1443.439781 Hartrees

G = -1443.082653 Hartrees

|    |           |           |           |
|----|-----------|-----------|-----------|
| 6  | -2.696832 | -0.189783 | 0.568708  |
| 6  | -4.618444 | -1.710360 | 1.897032  |
| 6  | -1.661054 | 0.491252  | -0.183948 |
| 6  | -0.579900 | 0.430764  | -0.852644 |
| 6  | -2.410926 | -0.711504 | 1.841470  |
| 1  | -3.161260 | -1.892848 | 3.468434  |
| 6  | -3.381604 | -1.476901 | 2.489179  |
| 6  | -3.940590 | -0.429405 | -0.028316 |
| 6  | -4.897439 | -1.183712 | 0.635300  |
| 1  | -5.364593 | -2.302281 | 2.417907  |
| 1  | -5.860803 | -1.362683 | 0.168386  |
| 1  | -4.147338 | -0.010141 | -1.007180 |
| 6  | 0.382350  | -2.570820 | -2.203384 |
| 6  | -1.019731 | -2.460009 | -1.912150 |
| 6  | 0.970479  | -3.427099 | -1.200718 |
| 1  | -1.742087 | -1.885429 | -2.476256 |
| 1  | 2.018391  | -3.687604 | -1.132263 |
| 6  | -1.263342 | -3.131322 | -0.690868 |
| 1  | -2.210486 | -3.182816 | -0.170622 |
| 6  | -0.027995 | -3.757191 | -0.270201 |
| 1  | 0.112516  | -4.317435 | 0.644871  |
| 1  | 0.888501  | -2.170434 | -3.069654 |
| 14 | 0.223984  | 1.496168  | -2.199967 |
| 35 | -2.673162 | 2.852702  | -0.111987 |
| 6  | 1.649700  | 0.595028  | -3.027886 |
| 1  | 1.285543  | -0.111582 | -3.782090 |
| 1  | 2.276801  | 0.051591  | -2.315754 |
| 1  | 2.276296  | 1.328855  | -3.550934 |
| 6  | -1.120359 | 1.800358  | -3.473072 |
| 1  | -1.957402 | 2.357427  | -3.040052 |
| 1  | -1.506352 | 0.852569  | -3.868162 |
| 1  | -0.719394 | 2.374149  | -4.318110 |
| 6  | 0.891162  | 3.121383  | -1.522542 |
| 1  | 1.373908  | 3.655557  | -2.350851 |
| 1  | 1.659550  | 2.963863  | -0.756709 |
| 1  | 0.091277  | 3.771711  | -1.152008 |
| 8  | 2.059024  | -0.692809 | -0.079874 |
| 6  | 2.339285  | 0.407393  | 0.522022  |
| 8  | 1.547274  | 1.093840  | 1.186630  |
| 6  | 3.770266  | 0.867085  | 0.329531  |
| 1  | 4.460885  | 0.020425  | 0.309710  |
| 1  | 3.840208  | 1.376562  | -0.639899 |
| 1  | 4.059692  | 1.570294  | 1.113327  |
| 6  | -1.061878 | -0.522684 | 2.466731  |
| 1  | -1.114980 | -0.725710 | 3.541130  |

Int6e

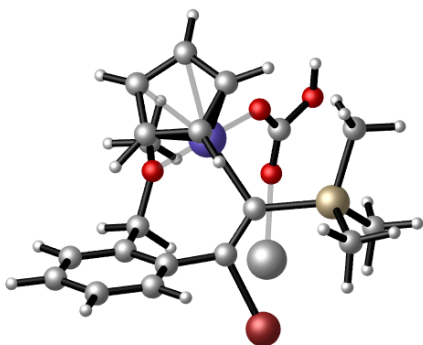

|    |          |           |           |
|----|----------|-----------|-----------|
| 1  | 1.501846 | -0.583737 | 2.978716  |
| 1  | 0.749921 | -2.086867 | 3.615086  |
| 45 | 0.109558 | -1.498713 | -0.366468 |
| 8  | 3.916097 | 0.460922  | 0.251607  |
| 1  | 4.210490 | -0.231518 | -0.362326 |

E = -1596.913305 Hartrees

G = -1596.577696 Hartrees

|    |           |           |           |
|----|-----------|-----------|-----------|
| 6  | -2.693431 | -0.148369 | 0.602978  |
| 6  | -4.575273 | -1.900336 | 1.702966  |
| 6  | -1.700253 | 0.709508  | -0.089044 |
| 6  | -0.590869 | 0.410658  | -0.752328 |
| 6  | -2.429352 | -0.773816 | 1.829949  |
| 1  | -3.167795 | -2.141987 | 3.309614  |
| 6  | -3.377322 | -1.650668 | 2.363183  |
| 6  | -3.903221 | -0.396464 | -0.054829 |
| 6  | -4.838174 | -1.268537 | 0.488382  |
| 1  | -5.300384 | -2.584553 | 2.132472  |
| 1  | -5.769499 | -1.456580 | -0.036884 |
| 1  | -4.102116 | 0.090336  | -1.005567 |
| 6  | 0.294502  | -2.598785 | -2.175454 |
| 6  | -1.093876 | -2.358794 | -1.925195 |
| 6  | 0.778326  | -3.531971 | -1.173066 |
| 1  | -1.754265 | -1.742006 | -2.519243 |
| 1  | 1.792963  | -3.900254 | -1.098638 |
| 6  | -1.409571 | -2.985794 | -0.691943 |
| 1  | -2.369837 | -2.967909 | -0.193801 |
| 6  | -0.251101 | -3.755176 | -0.265970 |
| 1  | -0.187399 | -4.327886 | 0.649972  |
| 1  | 0.857826  | -2.256814 | -3.031357 |
| 14 | 0.224922  | 1.445681  | -2.146055 |
| 35 | -2.363742 | 2.658266  | -0.014400 |
| 6  | 1.498578  | 0.453617  | -3.107955 |
| 1  | 1.022834  | -0.262258 | -3.786512 |
| 1  | 2.199012  | -0.082025 | -2.461587 |
| 1  | 2.073383  | 1.150552  | -3.731750 |
| 6  | -1.147139 | 1.879762  | -3.360042 |
| 1  | -1.858319 | 2.614485  | -2.970822 |
| 1  | -1.710087 | 0.981731  | -3.644103 |
| 1  | -0.703567 | 2.293727  | -4.274715 |
| 6  | 1.107415  | 3.000526  | -1.544037 |
| 1  | 1.482061  | 3.528182  | -2.431516 |
| 1  | 1.979873  | 2.767012  | -0.921664 |
| 1  | 0.465414  | 3.711564  | -1.009896 |
| 8  | 2.083429  | -0.699383 | -0.153206 |
| 6  | 2.595322  | 0.281884  | 0.465603  |
| 8  | 2.069765  | 1.087658  | 1.255332  |
| 47 | 0.188041  | 2.311947  | 1.347411  |
| 6  | -1.127563 | -0.580187 | 2.545164  |
| 1  | -1.209499 | -0.932247 | 3.578865  |
| 1  | -0.829419 | 0.479342  | 2.583085  |
| 8  | -0.107082 | -1.336413 | 1.891471  |
| 6  | 1.043022  | -1.540001 | 2.711865  |
| 1  | 1.747422  | -2.138835 | 2.134962  |



TS<sub>6-7e</sub>

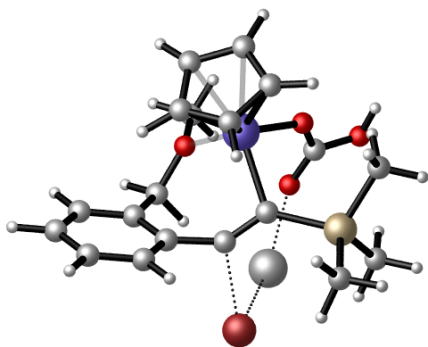

|    |          |           |           |
|----|----------|-----------|-----------|
| 1  | 1.486831 | -0.743585 | 3.004660  |
| 1  | 0.685596 | -2.255171 | 3.557668  |
| 45 | 0.151824 | -1.557400 | -0.388756 |
| 8  | 3.708679 | 0.760729  | 0.272881  |
| 1  | 4.074024 | 0.172410  | -0.408294 |

E = -1596.911467 Hartrees

G = -1596.575811 Hartrees

|    |           |           |           |
|----|-----------|-----------|-----------|
| 6  | -2.673030 | -0.189626 | 0.576656  |
| 6  | -4.650977 | -1.756905 | 1.764144  |
| 6  | -1.629325 | 0.552027  | -0.130753 |
| 6  | -0.566002 | 0.375992  | -0.844337 |
| 6  | -2.435141 | -0.771770 | 1.832108  |
| 1  | -3.249645 | -2.022383 | 3.373260  |
| 6  | -3.432957 | -1.559699 | 2.407264  |
| 6  | -3.896600 | -0.392413 | -0.071689 |
| 6  | -4.882597 | -1.170296 | 0.520764  |
| 1  | -5.417255 | -2.367548 | 2.231235  |
| 1  | -5.829393 | -1.320790 | 0.011763  |
| 1  | -4.067037 | 0.064676  | -1.041794 |
| 6  | 0.405744  | -2.678247 | -2.174837 |
| 6  | -0.995063 | -2.486149 | -1.948203 |
| 6  | 0.913990  | -3.536801 | -1.125641 |
| 1  | -1.667040 | -1.905112 | -2.565323 |
| 1  | 1.943387  | -3.851045 | -1.015147 |
| 6  | -1.311873 | -3.094903 | -0.705650 |
| 1  | -2.278767 | -3.086025 | -0.219841 |
| 6  | -0.128286 | -3.782946 | -0.227641 |
| 1  | -0.051928 | -4.316418 | 0.710673  |
| 1  | 0.968523  | -2.332528 | -3.029307 |
| 14 | 0.244393  | 1.433893  | -2.210665 |
| 35 | -2.296924 | 2.764796  | 0.157759  |
| 6  | 1.434003  | 0.400421  | -3.230746 |
| 1  | 0.900038  | -0.290802 | -3.891926 |
| 1  | 2.131366  | -0.167696 | -2.608377 |
| 1  | 2.019901  | 1.072043  | -3.871381 |
| 6  | -1.160327 | 1.978244  | -3.333355 |
| 1  | -1.846167 | 2.671647  | -2.837104 |
| 1  | -1.740233 | 1.113097  | -3.677481 |
| 1  | -0.751942 | 2.479163  | -4.220291 |
| 6  | 1.200555  | 2.920916  | -1.563586 |
| 1  | 1.594575  | 3.455589  | -2.438415 |
| 1  | 2.062132  | 2.643246  | -0.945514 |
| 1  | 0.580289  | 3.636717  | -1.011401 |
| 8  | 2.060672  | -0.642021 | -0.154340 |
| 6  | 2.441270  | 0.367298  | 0.518210  |
| 8  | 1.824895  | 1.016939  | 1.380016  |
| 47 | 0.080906  | 2.443342  | 1.396449  |
| 6  | -1.116454 | -0.617395 | 2.528126  |
| 1  | -1.198240 | -0.975023 | 3.559841  |
| 1  | -0.786239 | 0.430247  | 2.566482  |
| 8  | -0.122629 | -1.398684 | 1.859896  |
| 6  | 1.008559  | -1.673604 | 2.686820  |
| 1  | 1.706981  | -2.262769 | 2.092634  |

Int6f

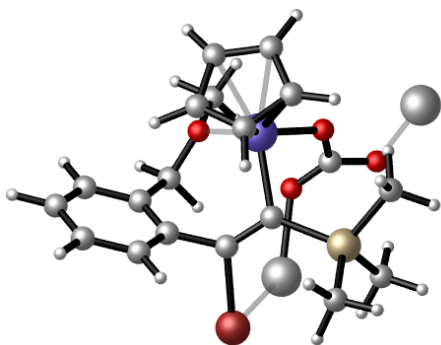

|    |          |           |           |
|----|----------|-----------|-----------|
| 1  | 1.512934 | -0.823572 | 2.960314  |
| 1  | 0.663489 | -2.261594 | 3.630849  |
| 45 | 0.158532 | -1.542428 | -0.357169 |
| 8  | 3.412917 | 1.054994  | 0.343736  |
| 47 | 4.171332 | -0.316137 | -1.298216 |

E = -1742.098632 Hartrees

G = 1741.778248 Hartrees

|    |           |           |           |
|----|-----------|-----------|-----------|
| 6  | -2.654318 | -0.148720 | 0.594247  |
| 6  | -4.585965 | -1.782076 | 1.787345  |
| 6  | -1.646020 | 0.665176  | -0.124626 |
| 6  | -0.559574 | 0.350208  | -0.803604 |
| 6  | -2.398477 | -0.731877 | 1.842726  |
| 1  | -3.165183 | -2.012298 | 3.384862  |
| 6  | -3.370114 | -1.551349 | 2.421978  |
| 6  | -3.879919 | -0.380848 | -0.040674 |
| 6  | -4.840518 | -1.192826 | 0.549442  |
| 1  | -5.331387 | -2.418112 | 2.254842  |
| 1  | -5.785503 | -1.366370 | 0.043707  |
| 1  | -4.072345 | 0.075663  | -1.007754 |
| 6  | 0.390393  | -2.671611 | -2.147496 |
| 6  | -1.009378 | -2.465496 | -1.912574 |
| 6  | 0.888905  | -3.567661 | -1.122537 |
| 1  | -1.678847 | -1.876660 | -2.524693 |
| 1  | 1.910860  | -3.910829 | -1.030109 |
| 6  | -1.323723 | -3.081632 | -0.677029 |
| 1  | -2.287168 | -3.071281 | -0.184586 |
| 6  | -0.146539 | -3.801053 | -0.221103 |
| 1  | -0.076141 | -4.352487 | 0.707294  |
| 1  | 0.944702  | -2.343199 | -3.013779 |
| 14 | 0.246867  | 1.368624  | -2.200901 |
| 35 | -2.221695 | 2.649970  | 0.010651  |
| 6  | 1.386160  | 0.311718  | -3.265736 |
| 1  | 0.817015  | -0.325974 | -3.951553 |
| 1  | 2.043706  | -0.327172 | -2.667272 |
| 1  | 2.010036  | 0.973999  | -3.879677 |
| 6  | -1.133724 | 1.931760  | -3.355482 |
| 1  | -1.748300 | 2.733429  | -2.935158 |
| 1  | -1.798501 | 1.097427  | -3.611339 |
| 1  | -0.693318 | 2.302281  | -4.290409 |
| 6  | 1.252422  | 2.861504  | -1.640175 |
| 1  | 1.677611  | 3.329950  | -2.538347 |
| 1  | 2.091564  | 2.585539  | -0.989923 |
| 1  | 0.645142  | 3.633498  | -1.150932 |
| 8  | 2.031039  | -0.608679 | -0.094309 |
| 6  | 2.292484  | 0.496007  | 0.583542  |
| 8  | 1.468531  | 0.937607  | 1.444060  |
| 47 | 0.279204  | 2.795582  | 1.367519  |
| 6  | -1.067277 | -0.570186 | 2.511758  |
| 1  | -1.148048 | -0.818673 | 3.576020  |
| 1  | -0.664350 | 0.442691  | 2.417231  |
| 8  | -0.149930 | -1.481825 | 1.902589  |
| 6  | 0.989078  | -1.750620 | 2.716864  |
| 1  | 1.645047  | -2.407201 | 2.144528  |

TS<sub>6-7f</sub>

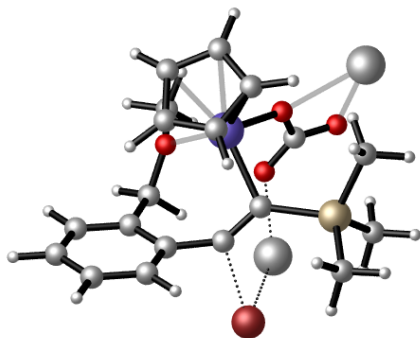

E = -1742.097573 Hartrees

G = -1741.777940 Hartrees

|   |           |           |           |
|---|-----------|-----------|-----------|
| 6 | -2.659144 | -0.214285 | 0.581290  |
| 6 | -4.627661 | -1.798175 | 1.766825  |
| 6 | -1.621219 | 0.545829  | -0.119518 |
| 6 | -0.555650 | 0.364492  | -0.831838 |
| 6 | -2.418122 | -0.798906 | 1.834004  |
| 1 | -3.220982 | -2.059536 | 3.372737  |
| 6 | -3.410114 | -1.594815 | 2.408603  |
| 6 | -3.883360 | -0.421765 | -0.065147 |
| 6 | -4.863822 | -1.208558 | 0.525345  |
| 1 | -5.389695 | -2.415493 | 2.232428  |
| 1 | -5.810298 | -1.363555 | 0.016794  |
| 1 | -4.058710 | 0.037914  | -1.033333 |
| 6 | 0.484315  | -2.645289 | -2.192174 |
| 6 | -0.925226 | -2.486203 | -1.974199 |
| 6 | 0.998532  | -3.514038 | -1.156803 |
| 1 | -1.601839 | -1.907394 | -2.588429 |
| 1 | 2.031783  | -3.813284 | -1.040715 |
| 6 | -1.244282 | -3.130374 | -0.754177 |
| 1 | -2.215715 | -3.154255 | -0.278684 |
| 6 | -0.049431 | -3.795621 | -0.274164 |

|    |           |           |           |
|----|-----------|-----------|-----------|
| 1  | 0.027271  | -4.346395 | 0.654037  |
| 1  | 1.041892  | -2.280533 | -3.041915 |
| 14 | 0.227359  | 1.444610  | -2.187540 |
| 35 | -2.269212 | 2.727819  | 0.191947  |
| 6  | 1.341777  | 0.407869  | -3.292909 |
| 1  | 0.759616  | -0.237770 | -3.959710 |
| 1  | 2.023614  | -0.222790 | -2.712081 |
| 1  | 1.942825  | 1.075523  | -3.923218 |
| 6  | -1.181752 | 2.054518  | -3.273715 |
| 1  | -0.772664 | 2.523440  | -4.177911 |
| 1  | -1.814841 | 2.789548  | -2.767678 |
| 1  | -1.819489 | 1.220196  | -3.591032 |
| 6  | 1.250401  | 2.890323  | -1.551951 |
| 1  | 2.089735  | 2.570883  | -0.922322 |
| 1  | 0.656951  | 3.642567  | -1.017267 |
| 1  | 1.677169  | 3.397764  | -2.428158 |
| 8  | 2.043244  | -0.607603 | -0.104542 |
| 6  | 2.319905  | 0.473280  | 0.612495  |
| 8  | 1.512588  | 0.886575  | 1.499658  |
| 47 | 0.157423  | 2.631720  | 1.408707  |
| 6  | -1.087345 | -0.656495 | 2.508869  |
| 1  | -1.170383 | -0.943193 | 3.562926  |
| 1  | -0.694902 | 0.364015  | 2.457165  |
| 8  | -0.156868 | -1.536981 | 1.872919  |
| 6  | 0.974130  | -1.827984 | 2.693260  |
| 1  | 1.636873  | -2.468970 | 2.111118  |
| 1  | 1.494729  | -0.907494 | 2.966199  |
| 1  | 0.638210  | -2.363177 | 3.589201  |
| 45 | 0.194675  | -1.558393 | -0.386899 |
| 8  | 3.440615  | 1.028273  | 0.371689  |
| 47 | 4.120844  | -0.289205 | -1.367513 |

## 7.4. Mechanism of the Rh-Catalyzed *ortho*-Alkynylation of Acetophenone

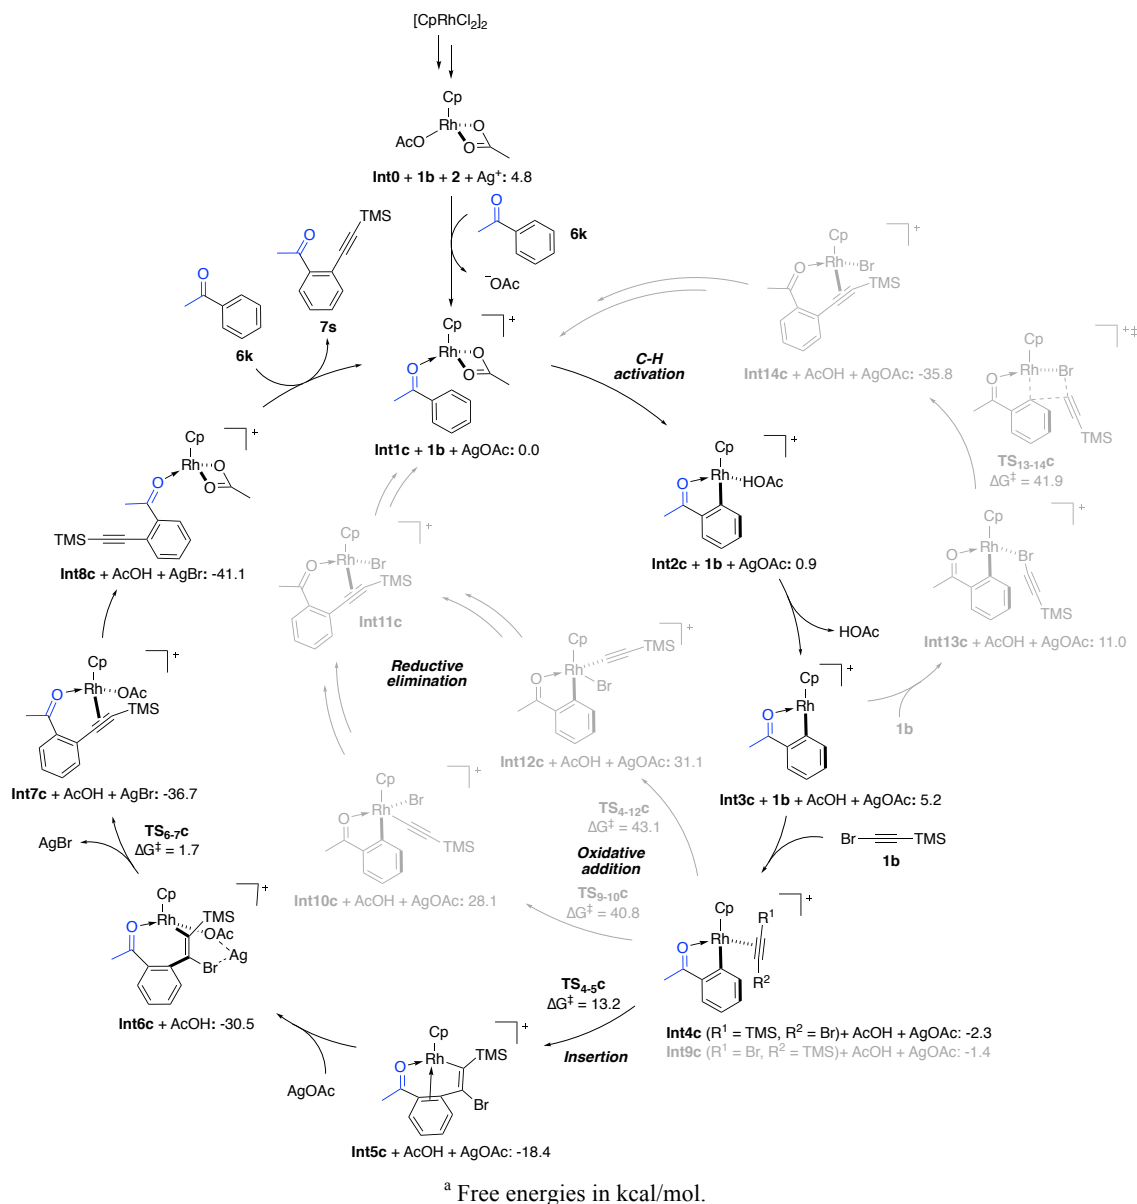

**Scheme S7.4.1 - Rh-catalyzed *ortho*-alkynylation of acetophenone**

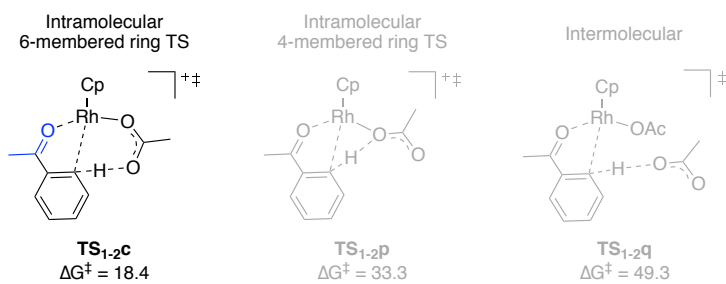

**Scheme S7.4.2 - Acetate-assisted C-H activation of acetophenone**

6k

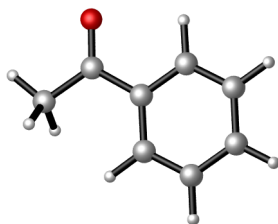

E = -384.773156 Hartrees

G = -384.666479 Hartrees

|   |           |           |           |
|---|-----------|-----------|-----------|
| 6 | 0.852308  | -0.643246 | -0.195352 |
| 6 | 2.184525  | -0.746468 | -0.590387 |
| 6 | 3.024077  | 0.361604  | -0.510794 |
| 6 | 2.535511  | 1.582719  | -0.032663 |
| 6 | 1.195762  | 1.676332  | 0.362230  |
| 6 | 0.358056  | 0.570813  | 0.282651  |
| 1 | 0.198366  | -1.508245 | -0.259170 |
| 1 | 2.571219  | -1.690147 | -0.963439 |
| 1 | 4.059245  | 0.264829  | -0.822819 |
| 1 | 0.825011  | 2.627522  | 0.730819  |
| 1 | -0.680334 | 0.653919  | 0.589600  |
| 6 | 3.394787  | 2.807374  | 0.066395  |
| 8 | 2.930211  | 3.854119  | 0.487177  |
| 6 | 4.838869  | 2.716742  | -0.364009 |
| 1 | 5.371777  | 1.960800  | 0.223678  |
| 1 | 4.911535  | 2.425669  | -1.417926 |
| 1 | 5.317267  | 3.687831  | -0.223547 |

Int1c

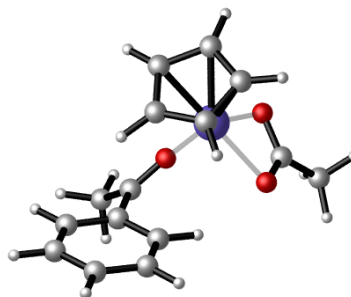

E = -916.045039 Hartrees

G = -915.812138 Hartrees

|    |           |           |           |
|----|-----------|-----------|-----------|
| 8  | -1.445809 | -0.254124 | 0.406032  |
| 6  | -2.136008 | -0.473309 | -0.639855 |
| 8  | -1.586475 | -1.150733 | -1.564564 |
| 6  | 1.928879  | 1.820835  | 0.034315  |
| 6  | 1.233622  | 1.505439  | 1.208921  |
| 6  | 3.262896  | 2.238824  | 0.101915  |
| 6  | 1.874100  | 1.596182  | 2.438630  |
| 6  | 3.906473  | 2.297738  | 1.334330  |
| 6  | 3.213648  | 1.979341  | 2.501099  |
| 1  | 0.188631  | 1.214755  | 1.157086  |
| 1  | 3.810121  | 2.485307  | -0.802779 |
| 1  | 1.328059  | 1.368518  | 3.348953  |
| 1  | 4.948416  | 2.597762  | 1.383968  |
| 1  | 3.715839  | 2.038735  | 3.461892  |
| 45 | 0.265643  | -1.193050 | -0.504447 |
| 6  | 2.051427  | -2.248207 | -1.071270 |
| 1  | 2.592911  | -2.042083 | -1.984900 |
| 6  | 0.983371  | -3.173085 | -0.924198 |
| 1  | 0.545037  | -3.762997 | -1.719040 |
| 6  | 0.492643  | -3.084388 | 0.418451  |
| 1  | -0.333108 | -3.643787 | 0.836598  |
| 6  | 2.265139  | -1.615740 | 0.202909  |
| 1  | 2.991066  | -0.842242 | 0.414548  |
| 6  | 1.320699  | -2.138779 | 1.117459  |
| 1  | 1.184376  | -1.814013 | 2.140802  |
| 6  | -3.531811 | 0.036206  | -0.782437 |
| 1  | -3.636232 | 0.558247  | -1.737788 |
| 1  | -4.223293 | -0.813113 | -0.788529 |
| 1  | -3.785734 | 0.704799  | 0.041418  |
| 8  | 0.520998  | 0.711366  | -1.529502 |
| 6  | 1.242217  | 1.684340  | -1.271975 |
| 6  | 1.388105  | 2.763256  | -2.294713 |
| 1  | 0.988354  | 3.697539  | -1.883636 |
| 1  | 2.446406  | 2.940921  | -2.514150 |
| 1  | 0.857939  | 2.497836  | -3.210334 |

TS<sub>1-2c</sub>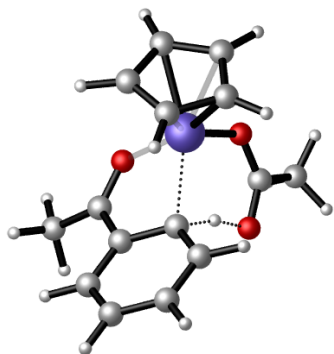

E = -916.010921 Hartrees

G = -915.782859 Hartrees

|    |           |           |           |
|----|-----------|-----------|-----------|
| 8  | -1.374835 | 1.184772  | 0.601770  |
| 6  | -1.967335 | 0.245594  | 0.004975  |
| 8  | -1.377013 | -0.788177 | -0.437721 |
| 6  | 1.867270  | 1.668559  | -0.265673 |
| 6  | 1.226896  | 0.884418  | 0.724141  |
| 6  | 2.899462  | 2.545989  | 0.059804  |
| 6  | 1.665893  | 1.001176  | 2.046600  |
| 6  | 3.327664  | 2.628644  | 1.383824  |
| 6  | 2.714221  | 1.861121  | 2.372836  |
| 1  | -0.078691 | 0.864823  | 0.648605  |
| 1  | 3.383952  | 3.144968  | -0.705162 |
| 1  | 1.169138  | 0.433949  | 2.828452  |
| 1  | 4.139685  | 3.299603  | 1.645183  |
| 1  | 3.048387  | 1.942126  | 3.402714  |
| 45 | 0.694098  | -1.020137 | -0.270283 |
| 6  | 2.454199  | -2.191347 | -0.776545 |
| 1  | 3.216317  | -1.825843 | -1.452350 |
| 6  | 1.264529  | -2.914946 | -1.158678 |
| 1  | 0.993424  | -3.207636 | -2.164046 |
| 6  | 0.519796  | -3.169562 | 0.020333  |
| 1  | -0.452550 | -3.642570 | 0.063597  |
| 6  | 2.420287  | -1.991755 | 0.621801  |
| 1  | 3.154053  | -1.450712 | 1.203642  |
| 6  | 1.194777  | -2.559572 | 1.123759  |
| 1  | 0.866597  | -2.565350 | 2.153973  |
| 6  | -3.446121 | 0.357477  | -0.237607 |
| 1  | -3.596401 | 0.930744  | -1.159549 |
| 1  | -3.895432 | -0.628684 | -0.364975 |
| 1  | -3.926301 | 0.895527  | 0.581999  |
| 8  | 0.755789  | 0.419120  | -1.891145 |
| 6  | 1.380252  | 1.465950  | -1.641202 |
| 6  | 1.598303  | 2.475509  | -2.714282 |
| 1  | 1.212879  | 3.449020  | -2.393278 |
| 1  | 2.673460  | 2.593819  | -2.893325 |
| 1  | 1.108697  | 2.160478  | -3.636579 |

Int2c

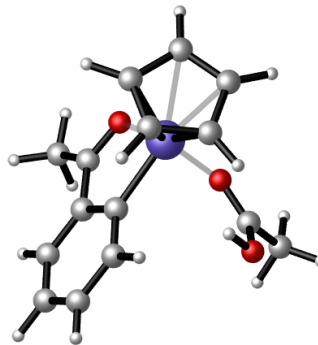

E = -916.045118 Hartrees

G = -915.810661 Hartrees

|    |           |           |           |
|----|-----------|-----------|-----------|
| 8  | -1.424185 | 0.017520  | 1.680005  |
| 6  | -1.709295 | 0.253827  | 0.416996  |
| 8  | -0.977965 | -0.088655 | -0.515206 |
| 6  | 1.899338  | 1.676587  | -0.520678 |
| 6  | 1.657085  | 0.646772  | 0.412137  |
| 6  | 2.335448  | 2.943117  | -0.109976 |
| 6  | 1.867084  | 0.911467  | 1.764158  |
| 6  | 2.538000  | 3.189006  | 1.240647  |
| 6  | 2.304950  | 2.173677  | 2.170495  |
| 1  | -0.557738 | -0.433694 | 1.737382  |
| 1  | 2.511795  | 3.726651  | -0.841402 |
| 1  | 1.693755  | 0.142746  | 2.513111  |
| 1  | 2.878319  | 4.164455  | 1.572898  |
| 1  | 2.467344  | 2.366532  | 3.227324  |
| 45 | 0.970792  | -1.053727 | -0.415556 |
| 6  | 2.529085  | -2.502100 | -0.594185 |
| 1  | 3.473326  | -2.280770 | -1.074329 |
| 6  | 1.400044  | -3.178307 | -1.215914 |
| 1  | 1.333353  | -3.454609 | -2.259723 |
| 6  | 0.396255  | -3.294353 | -0.265139 |
| 1  | -0.601517 | -3.680342 | -0.428368 |
| 6  | 2.231162  | -2.322999 | 0.787728  |
| 1  | 2.887818  | -1.889155 | 1.529500  |
| 6  | 0.872529  | -2.702009 | 0.977114  |
| 1  | 0.334840  | -2.695278 | 1.916661  |
| 6  | -2.983939 | 0.994247  | 0.201656  |
| 1  | -2.813329 | 2.048424  | 0.448608  |
| 1  | -3.290742 | 0.914678  | -0.841011 |
| 1  | -3.763465 | 0.612969  | 0.865106  |
| 8  | 1.290281  | 0.143691  | -2.150002 |
| 6  | 1.657166  | 1.312755  | -1.912570 |
| 6  | 1.820138  | 2.272577  | -3.042130 |
| 1  | 1.090422  | 3.084066  | -2.938213 |
| 1  | 2.818042  | 2.722149  | -3.016193 |
| 1  | 1.665953  | 1.763982  | -3.994923 |

TS<sub>1-2p</sub>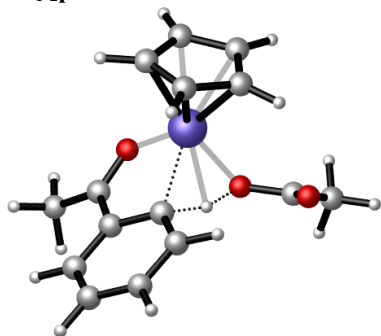

E = -915.988275 Hartrees

G = -915.759053 Hartrees

|    |           |           |           |
|----|-----------|-----------|-----------|
| 6  | 2.930605  | -4.314444 | 1.841826  |
| 1  | 3.990050  | -4.154167 | 1.983619  |
| 6  | 2.077944  | -3.584434 | 0.934623  |
| 1  | 2.404613  | -2.819599 | 0.242367  |
| 6  | 0.786346  | -4.130429 | 1.013989  |
| 1  | -0.063844 | -3.850920 | 0.405757  |
| 6  | 2.121487  | -5.257737 | 2.541807  |
| 1  | 2.468299  | -5.966656 | 3.281604  |
| 6  | 0.810749  | -5.202267 | 1.985203  |
| 1  | -0.030878 | -5.819085 | 2.271158  |
| 45 | 2.165554  | -5.735725 | 0.436145  |
| 6  | 2.048920  | -8.662182 | 0.091036  |
| 6  | 3.979239  | -8.167867 | 1.468586  |
| 6  | 2.098705  | -9.999310 | 0.471565  |
| 6  | 4.021583  | -9.508052 | 1.860974  |
| 1  | 4.728432  | -7.468168 | 1.825477  |
| 6  | 3.087292  | -10.41411 | 1.366347  |
| 1  | 1.375390  | -10.71590 | 0.095250  |
| 1  | 4.788406  | -9.846326 | 2.550737  |
| 1  | 3.128119  | -11.45425 | 1.673421  |
| 8  | 3.614599  | -5.940145 | -1.227398 |
| 8  | 5.409250  | -5.294298 | -0.028917 |
| 6  | 4.803613  | -5.335229 | -1.081084 |
| 6  | 5.294680  | -4.730718 | -2.369545 |
| 1  | 6.263892  | -4.253237 | -2.218714 |
| 1  | 5.377195  | -5.508370 | -3.135224 |
| 1  | 4.568757  | -3.994215 | -2.729181 |
| 6  | 2.994985  | -7.730988 | 0.582650  |
| 1  | 3.503116  | -6.899585 | -0.350689 |
| 8  | 0.916834  | -6.875393 | -0.899854 |
| 6  | 1.023498  | -8.112189 | -0.816523 |
| 6  | 0.134332  | -8.986409 | -1.630008 |
| 1  | 0.738732  | -9.657276 | -2.250020 |
| 1  | -0.473221 | -9.612553 | -0.966187 |
| 1  | -0.517640 | -8.379270 | -2.259277 |

TS<sub>1-2q</sub>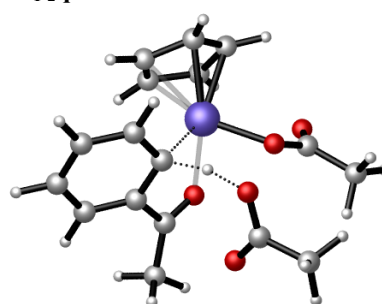

E = -1144.556545 Hartrees

G = -1144.285138 Hartrees

|    |           |           |           |
|----|-----------|-----------|-----------|
| 6  | 2.810343  | -4.317656 | 2.260787  |
| 1  | 3.818800  | -4.164721 | 2.619957  |
| 6  | 2.036377  | -3.395057 | 1.497763  |
| 1  | 2.381257  | -2.449334 | 1.104034  |
| 6  | 0.784939  | -4.005029 | 1.201523  |
| 1  | 0.004122  | -3.580746 | 0.587070  |
| 6  | 1.982519  | -5.475038 | 2.516357  |
| 1  | 2.285723  | -6.361013 | 3.057421  |
| 6  | 0.749202  | -5.285766 | 1.866712  |
| 1  | -0.060408 | -6.002166 | 1.819546  |
| 45 | 2.355081  | -5.205417 | 0.369042  |
| 6  | 2.559711  | -8.050200 | -0.250923 |
| 6  | 4.267440  | -7.624190 | 1.392008  |
| 6  | 2.348184  | -9.321992 | 0.273698  |
| 6  | 4.043376  | -8.884083 | 1.943564  |
| 1  | 5.044998  | -6.986499 | 1.804499  |
| 6  | 3.088542  | -9.731774 | 1.383110  |
| 1  | 1.599934  | -9.983324 | -0.154052 |
| 1  | 4.621649  | -9.214656 | 2.801526  |
| 1  | 2.920503  | -10.71652 | 1.808610  |
| 8  | 3.357702  | -4.306183 | -1.160468 |
| 6  | 2.781862  | -3.353510 | -1.827595 |
| 8  | 1.715694  | -2.809800 | -1.546414 |
| 6  | 3.579238  | -2.965092 | -3.061569 |
| 1  | 3.152608  | -2.076125 | -3.531354 |
| 1  | 4.625816  | -2.780628 | -2.801324 |
| 1  | 3.558512  | -3.797041 | -3.774357 |
| 8  | 5.279776  | -6.344557 | -1.462370 |
| 8  | 3.771471  | -7.160801 | -2.917133 |
| 6  | 4.855060  | -6.619457 | -2.636428 |
| 6  | 5.812331  | -6.232988 | -3.761527 |
| 1  | 5.987735  | -5.151484 | -3.741022 |
| 1  | 6.782795  | -6.720489 | -3.615677 |
| 1  | 5.408144  | -6.514538 | -4.737128 |
| 6  | 3.528326  | -7.174021 | 0.288928  |
| 1  | 4.207892  | -6.526704 | -0.526833 |
| 8  | 1.424144  | -6.279184 | -1.251549 |
| 6  | 1.711271  | -7.484522 | -1.323107 |
| 6  | 1.097055  | -8.340758 | -2.377408 |
| 1  | 0.707413  | -7.717507 | -3.183535 |
| 1  | 1.830187  | -9.049858 | -2.766164 |
| 1  | 0.268451  | -8.906807 | -1.932835 |

Int3c

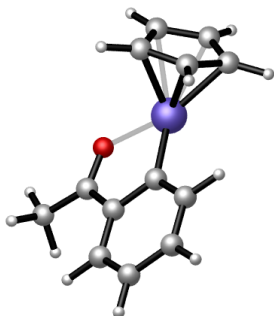

E = -687.000304 Hartrees

G = -686.823898 Hartrees

|    |           |           |           |
|----|-----------|-----------|-----------|
| 6  | 2.852516  | -4.297149 | 2.156129  |
| 1  | 3.868943  | -4.172249 | 2.506391  |
| 6  | 2.207630  | -3.484942 | 1.128323  |
| 1  | 2.699054  | -2.719503 | 0.542181  |
| 6  | 0.909720  | -3.935680 | 0.969133  |
| 1  | 0.191475  | -3.594388 | 0.235877  |
| 6  | 1.889691  | -5.176731 | 2.699025  |
| 1  | 2.033339  | -5.878219 | 3.509266  |
| 6  | 0.716295  | -5.063831 | 1.874659  |
| 1  | -0.205438 | -5.616632 | 2.002762  |
| 45 | 2.278920  | -5.770653 | 0.682243  |
| 6  | 2.178571  | -8.621040 | 0.215877  |
| 6  | 3.453838  | -8.145801 | 2.206499  |
| 6  | 2.420306  | -9.991912 | 0.362013  |
| 6  | 3.693904  | -9.515091 | 2.350005  |
| 1  | 3.867840  | -7.453407 | 2.933766  |
| 6  | 3.178708  | -10.43674 | 1.437509  |
| 1  | 2.024054  | -10.70216 | -0.358262 |
| 1  | 4.287972  | -9.867030 | 3.188865  |
| 1  | 3.370082  | -11.49696 | 1.567478  |
| 6  | 2.689870  | -7.681277 | 1.138442  |
| 8  | 1.296664  | -6.799126 | -0.916849 |
| 6  | 1.424124  | -8.042144 | -0.891842 |
| 6  | 0.823643  | -8.858410 | -1.984023 |
| 1  | 1.614019  | -9.405197 | -2.510793 |
| 1  | 0.136630  | -9.600540 | -1.563153 |
| 1  | 0.290704  | -8.215574 | -2.685933 |

Int4c

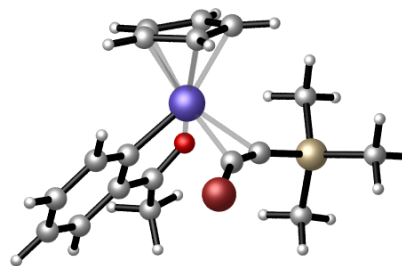

E = -1185.546161 Hartrees

G = -1185.259339 Hartrees

|    |           |           |           |
|----|-----------|-----------|-----------|
| 6  | 2.125062  | -3.294799 | 1.555962  |
| 1  | 3.060975  | -2.770308 | 1.414579  |
| 6  | 0.847907  | -2.910665 | 0.989519  |
| 1  | 0.690226  | -2.104197 | 0.286211  |
| 6  | -0.104553 | -3.830443 | 1.427477  |
| 1  | -1.141980 | -3.871911 | 1.122970  |
| 6  | 1.907867  | -4.391979 | 2.440225  |
| 1  | 2.659914  | -4.885350 | 3.040153  |
| 6  | 0.552808  | -4.794128 | 2.291181  |
| 1  | 0.070166  | -5.615014 | 2.804624  |
| 45 | 1.549166  | -5.017887 | 0.365854  |
| 6  | 2.649253  | -6.702370 | 0.567891  |
| 6  | 2.073940  | -7.833520 | -0.047348 |
| 6  | 3.858083  | -6.852308 | 1.242144  |
| 6  | 2.701461  | -9.087155 | 0.004460  |
| 6  | 4.473035  | -8.102537 | 1.298609  |
| 1  | 4.334669  | -6.003401 | 1.722255  |
| 6  | 3.902984  | -9.219367 | 0.681046  |
| 1  | 2.246594  | -9.946750 | -0.479006 |
| 1  | 5.414562  | -8.207484 | 1.830379  |
| 1  | 4.398383  | -10.18319 | 0.733065  |
| 6  | 1.925160  | -4.402398 | -1.759095 |
| 6  | 3.034122  | -4.613526 | -1.230377 |
| 35 | 4.861023  | -4.643847 | -1.239948 |
| 14 | 0.557077  | -4.019326 | -2.989597 |
| 6  | -1.035309 | -3.676017 | -2.069600 |
| 1  | -0.937466 | -2.824504 | -1.388113 |
| 1  | -1.830120 | -3.441274 | -2.788639 |
| 1  | -1.349097 | -4.552188 | -1.492741 |
| 6  | 1.163296  | -2.508633 | -3.920175 |
| 1  | 2.118979  | -2.699880 | -4.421380 |
| 1  | 0.433128  | -2.217760 | -4.685391 |
| 1  | 1.298879  | -1.656504 | -3.244055 |
| 6  | 0.411491  | -5.526217 | -4.092766 |
| 1  | 0.114390  | -6.408271 | -3.514510 |
| 1  | -0.346109 | -5.360753 | -4.868830 |
| 1  | 1.361826  | -5.748152 | -4.591600 |
| 8  | 0.329006  | -6.437798 | -0.637293 |
| 6  | 0.804824  | -7.593553 | -0.707061 |
| 6  | 0.054029  | -8.644981 | -1.449415 |
| 1  | -0.160994 | -9.488270 | -0.784089 |
| 1  | -0.879473 | -8.238376 | -1.840815 |
| 1  | 0.668062  | -9.024446 | -2.273466 |



TS4-5c

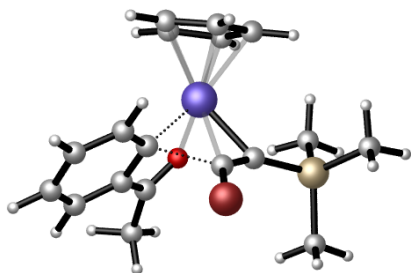

E = -1185.525351 Hartrees

G = -1185.238304 Hartrees

|    |           |           |           |
|----|-----------|-----------|-----------|
| 6  | 2.114477  | -3.315591 | 1.525556  |
| 1  | 3.091145  | -2.870229 | 1.387862  |
| 6  | 0.901925  | -2.895854 | 0.876794  |
| 1  | 0.823083  | -2.124238 | 0.122992  |
| 6  | -0.125585 | -3.754801 | 1.305806  |
| 1  | -1.153037 | -3.747871 | 0.967538  |
| 6  | 1.786567  | -4.352990 | 2.466460  |
| 1  | 2.487077  | -4.868242 | 3.109498  |
| 6  | 0.425496  | -4.658247 | 2.303388  |
| 1  | -0.125238 | -5.432150 | 2.821684  |
| 45 | 1.410841  | -5.018832 | 0.354277  |
| 6  | 2.761510  | -6.623295 | 0.241632  |
| 6  | 2.107743  | -7.844361 | -0.037104 |
| 6  | 4.009382  | -6.651732 | 0.872214  |
| 6  | 2.727210  | -9.066716 | 0.252383  |
| 6  | 4.590933  | -7.868586 | 1.203794  |
| 1  | 4.531439  | -5.724385 | 1.086481  |
| 6  | 3.964839  | -9.076389 | 0.877013  |
| 1  | 2.225237  | -10.00032 | 0.018278  |
| 1  | 5.551715  | -7.880059 | 1.709332  |
| 1  | 4.445146  | -10.01909 | 1.117195  |
| 6  | 1.687203  | -4.829102 | -1.710216 |
| 6  | 2.762381  | -5.423164 | -1.369761 |
| 35 | 4.472556  | -5.612041 | -2.106568 |
| 14 | 0.565387  | -4.018697 | -2.972467 |
| 6  | -1.139535 | -3.829235 | -2.220943 |
| 1  | -1.134431 | -3.092015 | -1.410297 |
| 1  | -1.852505 | -3.483613 | -2.979852 |
| 1  | -1.505780 | -4.781019 | -1.820442 |
| 6  | 1.325309  | -2.351459 | -3.373346 |
| 1  | 2.328141  | -2.462679 | -3.801506 |
| 1  | 0.705338  | -1.811690 | -4.099795 |
| 1  | 1.406755  | -1.727510 | -2.475458 |
| 6  | 0.549046  | -5.174523 | -4.449142 |
| 1  | 0.181633  | -6.167594 | -4.164607 |
| 1  | -0.109669 | -4.785322 | -5.235348 |
| 1  | 1.551783  | -5.292700 | -4.875982 |
| 8  | 0.179262  | -6.629182 | -0.432409 |
| 6  | 0.746651  | -7.732970 | -0.548282 |
| 6  | 0.029760  | -8.871837 | -1.190312 |
| 1  | -0.088706 | -9.687966 | -0.468395 |
| 1  | -0.952619 | -8.549063 | -1.538091 |
| 1  | 0.617786  | -9.257672 | -2.029759 |

Int5c

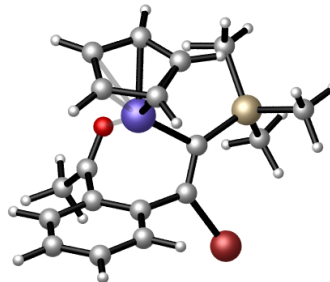

E = -1185.572444 Hartrees

G = -1185.284928 Hartrees

|    |           |           |           |
|----|-----------|-----------|-----------|
| 6  | 2.049855  | -3.813768 | 1.566560  |
| 1  | 3.097154  | -3.554551 | 1.482694  |
| 6  | 0.979213  | -3.212101 | 0.855600  |
| 1  | 1.058625  | -2.436862 | 0.105891  |
| 6  | -0.208933 | -3.915415 | 1.228513  |
| 1  | -1.202337 | -3.738034 | 0.837996  |
| 6  | 1.486283  | -4.757684 | 2.526665  |
| 1  | 2.064957  | -5.372374 | 3.203931  |
| 6  | 0.115103  | -4.810727 | 2.330600  |
| 1  | -0.585460 | -5.466353 | 2.830164  |
| 45 | 1.131789  | -5.299685 | 0.333448  |
| 6  | 2.983863  | -6.767898 | -0.626673 |
| 6  | 2.146601  | -7.781776 | -0.092104 |
| 6  | 4.256453  | -6.585410 | -0.054890 |
| 6  | 2.600133  | -8.588929 | 0.960600  |
| 6  | 4.680589  | -7.369728 | 1.004807  |
| 1  | 4.912275  | -5.825113 | -0.468126 |
| 6  | 3.853838  | -8.376994 | 1.510745  |
| 1  | 1.954107  | -9.367429 | 1.354303  |
| 1  | 5.663359  | -7.207921 | 1.435472  |
| 1  | 4.192793  | -8.998271 | 2.333228  |
| 6  | 1.564794  | -5.061852 | -1.654030 |
| 6  | 2.549269  | -5.938358 | -1.793306 |
| 35 | 3.545134  | -6.276294 | -3.430332 |
| 14 | 0.669282  | -3.924710 | -2.865372 |
| 6  | -1.022821 | -3.512201 | -2.154806 |
| 1  | -0.964676 | -2.782075 | -1.340263 |
| 1  | -1.655913 | -3.076311 | -2.937871 |
| 1  | -1.530811 | -4.408259 | -1.779336 |
| 6  | 1.700018  | -2.363780 | -3.054467 |
| 1  | 2.685325  | -2.586489 | -3.480450 |
| 1  | 1.200920  | -1.648463 | -3.719886 |
| 1  | 1.854855  | -1.868816 | -2.087986 |
| 6  | 0.419235  | -4.783920 | -4.519932 |
| 1  | -0.024571 | -5.778504 | -4.391624 |
| 1  | -0.266155 | -4.189524 | -5.137703 |
| 1  | 1.354132  | -4.901779 | -5.075846 |
| 8  | -0.013570 | -6.990206 | -0.495940 |
| 6  | 0.743045  | -7.962759 | -0.575810 |
| 6  | 0.283261  | -9.269663 | -1.110423 |
| 1  | 0.467255  | -10.06166 | -0.375504 |
| 1  | -0.777324 | -9.229860 | -1.362823 |
| 1  | 0.877109  | -9.516137 | -1.998817 |

**Int6c**

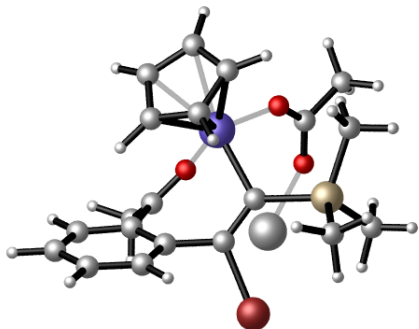

|   |           |           |          |
|---|-----------|-----------|----------|
| 6 | -1.184190 | -0.546791 | 2.441590 |
| 6 | -1.134336 | -0.279349 | 3.909290 |
| 1 | -1.832754 | 0.520758  | 4.172924 |
| 1 | -1.447454 | -1.176780 | 4.456486 |
| 1 | -0.116339 | -0.022589 | 4.207268 |

E = -1559.818870 Hartrees

G = -1559.486969 Hartrees

|    |           |           |           |
|----|-----------|-----------|-----------|
| 6  | -2.767515 | -0.101252 | 0.529584  |
| 6  | -4.619379 | -1.867406 | 1.705347  |
| 6  | -1.843759 | 0.827170  | -0.195564 |
| 6  | -0.680853 | 0.550785  | -0.815326 |
| 6  | -2.487093 | -0.719079 | 1.764188  |
| 1  | -3.210066 | -2.038589 | 3.309618  |
| 6  | -3.427939 | -1.572942 | 2.353796  |
| 6  | -3.986579 | -0.389106 | -0.091616 |
| 6  | -4.893789 | -1.275796 | 0.474943  |
| 1  | -5.328889 | -2.551790 | 2.158355  |
| 1  | -5.821539 | -1.495812 | -0.043618 |
| 1  | -4.223317 | 0.083071  | -1.040030 |
| 6  | 0.555442  | -2.521836 | -1.938183 |
| 6  | -0.853310 | -2.318111 | -1.841864 |
| 6  | 0.972252  | -3.335610 | -0.810911 |
| 1  | -1.475289 | -1.787450 | -2.550285 |
| 1  | 1.987947  | -3.648019 | -0.608481 |
| 6  | -1.267729 | -2.841295 | -0.585971 |
| 1  | -2.276136 | -2.838859 | -0.194638 |
| 6  | -0.131231 | -3.519798 | 0.014254  |
| 1  | -0.136067 | -4.009134 | 0.979576  |
| 1  | 1.191707  | -2.228458 | -2.760355 |
| 14 | 0.081453  | 1.546965  | -2.277232 |
| 35 | -2.756772 | 2.589147  | -0.466752 |
| 6  | 1.409307  | 0.549505  | -3.151327 |
| 1  | 0.971508  | -0.258793 | -3.747250 |
| 1  | 2.148874  | 0.128580  | -2.464726 |
| 1  | 1.927469  | 1.218414  | -3.850975 |
| 6  | -1.273502 | 1.856251  | -3.552099 |
| 1  | -1.862213 | 2.754869  | -3.348296 |
| 1  | -1.966701 | 1.008638  | -3.619440 |
| 1  | -0.805671 | 1.978847  | -4.537529 |
| 6  | 0.860572  | 3.164291  | -1.702267 |
| 1  | 1.201038  | 3.717226  | -2.587844 |
| 1  | 1.740530  | 2.985968  | -1.072130 |
| 1  | 0.165962  | 3.819158  | -1.162417 |
| 8  | 2.123991  | -0.379166 | -0.119414 |
| 6  | 2.760159  | 0.574549  | 0.422770  |
| 8  | 2.290360  | 1.516164  | 1.109811  |
| 47 | 0.112313  | 1.967583  | 1.139308  |
| 6  | 4.252015  | 0.590474  | 0.155115  |
| 1  | 4.644817  | -0.421741 | 0.037137  |
| 1  | 4.422015  | 1.133006  | -0.782898 |
| 1  | 4.783463  | 1.113375  | 0.953101  |
| 45 | 0.161245  | -1.251590 | -0.263920 |
| 8  | -0.119387 | -0.618983 | 1.809109  |

TS<sub>6-7c</sub>

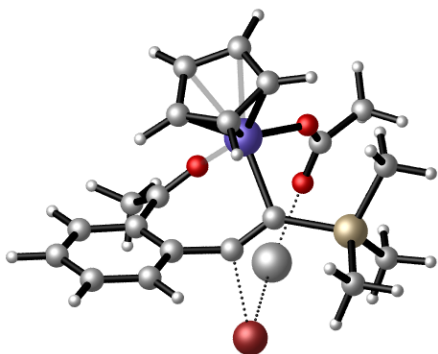

|   |           |           |          |
|---|-----------|-----------|----------|
| 6 | -1.147179 | -0.625107 | 2.363614 |
| 6 | -1.043286 | -0.342857 | 3.828026 |
| 1 | -1.670487 | 0.515094  | 4.091631 |
| 1 | -1.412020 | -1.202160 | 4.400350 |
| 1 | -0.001931 | -0.156008 | 4.094569 |

E = -1559.813585 Hartrees

G = -1559.484248 Hartrees

|    |           |           |           |
|----|-----------|-----------|-----------|
| 6  | -2.735313 | -0.175810 | 0.464737  |
| 6  | -4.730180 | -1.641898 | 1.770450  |
| 6  | -1.728986 | 0.594654  | -0.273662 |
| 6  | -0.670319 | 0.455688  | -1.001082 |
| 6  | -2.484619 | -0.737335 | 1.732365  |
| 1  | -3.311051 | -1.890573 | 3.356980  |
| 6  | -3.496051 | -1.452087 | 2.381838  |
| 6  | -3.985466 | -0.358135 | -0.130163 |
| 6  | -4.972987 | -1.094887 | 0.512761  |
| 1  | -5.500908 | -2.213033 | 2.277295  |
| 1  | -5.935280 | -1.236296 | 0.031470  |
| 1  | -4.180361 | 0.089587  | -1.099507 |
| 6  | 0.595695  | -2.653090 | -2.025115 |
| 6  | -0.820537 | -2.562753 | -1.846035 |
| 6  | 1.146462  | -3.339550 | -0.877353 |
| 1  | -1.525060 | -2.118806 | -2.536610 |
| 1  | 2.196492  | -3.540391 | -0.711367 |
| 6  | -1.118529 | -3.057383 | -0.547354 |
| 1  | -2.097537 | -3.093776 | -0.088662 |
| 6  | 0.106409  | -3.577136 | 0.027256  |
| 1  | 0.204433  | -4.004549 | 1.016577  |
| 1  | 1.151359  | -2.351941 | -2.901260 |
| 14 | 0.110424  | 1.504854  | -2.385067 |
| 35 | -2.455115 | 2.777405  | 0.041844  |
| 6  | 1.339195  | 0.473013  | -3.354344 |
| 1  | 0.847714  | -0.345085 | -3.892488 |
| 1  | 2.116507  | 0.056641  | -2.706351 |
| 1  | 1.823029  | 1.112425  | -4.103967 |
| 6  | -1.313232 | 1.969433  | -3.521022 |
| 1  | -2.033282 | 2.631071  | -3.028432 |
| 1  | -1.849494 | 1.074845  | -3.860607 |
| 1  | -0.929996 | 2.485743  | -4.410256 |
| 6  | 0.985818  | 3.039721  | -1.742301 |
| 1  | 1.456932  | 3.540767  | -2.598619 |
| 1  | 1.780494  | 2.805596  | -1.025408 |
| 1  | 0.298052  | 3.760600  | -1.285826 |
| 8  | 2.034989  | -0.310696 | -0.226058 |
| 6  | 2.541044  | 0.603658  | 0.499526  |
| 8  | 1.946354  | 1.405836  | 1.255894  |
| 47 | -0.060643 | 2.344935  | 1.258972  |
| 6  | 4.045992  | 0.741237  | 0.372294  |
| 1  | 4.520898  | -0.237717 | 0.271830  |
| 1  | 4.263255  | 1.314126  | -0.537284 |
| 1  | 4.460839  | 1.277601  | 1.227796  |
| 45 | 0.192221  | -1.360453 | -0.376398 |
| 8  | -0.108916 | -0.746345 | 1.704735  |

Int7c

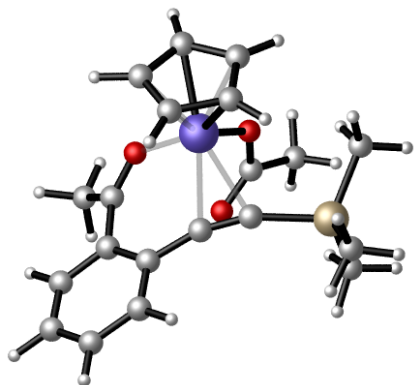

|   |           |           |          |
|---|-----------|-----------|----------|
| 6 | -0.482982 | -1.001574 | 3.767231 |
| 1 | -0.997844 | -1.771600 | 4.354148 |
| 1 | 0.592934  | -1.145495 | 3.871672 |
| 1 | -0.775285 | -0.023956 | 4.158428 |

E = -1400.800083 Hartrees

G = -1400.462265 Hartrees

|    |           |           |           |
|----|-----------|-----------|-----------|
| 6  | -2.471882 | -0.313668 | 0.537949  |
| 6  | -4.537059 | -0.367191 | 2.422604  |
| 6  | -1.458695 | -0.178477 | -0.468476 |
| 6  | -0.786147 | 0.190228  | -1.438845 |
| 6  | -2.193663 | -0.685217 | 1.871081  |
| 1  | -3.044254 | -0.959308 | 3.832712  |
| 6  | -3.238838 | -0.687380 | 2.801515  |
| 6  | -3.779735 | 0.021344  | 0.168879  |
| 6  | -4.807357 | -0.015038 | 1.103778  |
| 1  | -5.333201 | -0.390661 | 3.159199  |
| 1  | -5.817609 | 0.241254  | 0.801417  |
| 1  | -3.978529 | 0.316345  | -0.856108 |
| 6  | 1.391359  | -2.824761 | -2.007504 |
| 6  | 0.077854  | -2.599553 | -2.508435 |
| 6  | 1.279699  | -3.581132 | -0.802222 |
| 1  | -0.176632 | -2.035485 | -3.395827 |
| 1  | 2.094413  | -3.903018 | -0.167926 |
| 6  | -0.858731 | -3.268503 | -1.642768 |
| 1  | -1.934324 | -3.276148 | -1.752090 |
| 6  | -0.114948 | -3.877610 | -0.607294 |
| 1  | -0.531735 | -4.401357 | 0.243650  |
| 1  | 2.302573  | -2.413454 | -2.420414 |
| 14 | 0.024605  | 1.269343  | -2.747983 |
| 6  | 1.686157  | 0.550743  | -3.218532 |
| 1  | 1.580409  | -0.377177 | -3.791035 |
| 1  | 2.278254  | 0.340025  | -2.322223 |
| 1  | 2.236685  | 1.265677  | -3.842361 |
| 6  | -1.164685 | 1.300095  | -4.196916 |
| 1  | -2.157036 | 1.651816  | -3.891755 |
| 1  | -1.278386 | 0.305385  | -4.644032 |
| 1  | -0.794298 | 1.977829  | -4.976147 |
| 6  | 0.190982  | 2.944437  | -1.923766 |
| 1  | 0.780009  | 3.625542  | -2.550024 |
| 1  | 0.687929  | 2.856268  | -0.951084 |
| 1  | -0.791835 | 3.400610  | -1.757246 |
| 8  | 1.753955  | -0.411398 | -0.104530 |
| 6  | 1.650407  | 0.642441  | 0.660107  |
| 8  | 0.663746  | 0.990061  | 1.301306  |
| 6  | 2.926779  | 1.465997  | 0.660122  |
| 1  | 3.800747  | 0.829641  | 0.826511  |
| 1  | 3.046852  | 1.943262  | -0.319546 |
| 1  | 2.877804  | 2.239039  | 1.429619  |
| 45 | 0.227127  | -1.718700 | -0.534868 |
| 8  | -0.043236 | -1.698529 | 1.581515  |
| 6  | -0.856715 | -1.135756 | 2.322752  |

Int8c

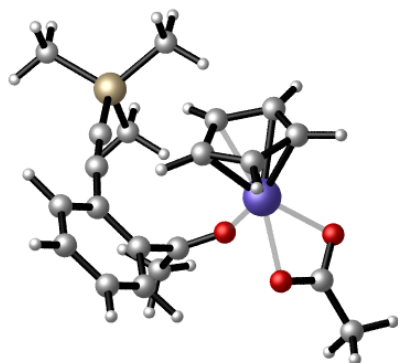

|   |          |           |           |
|---|----------|-----------|-----------|
| 6 | 2.087603 | -6.530169 | -4.276288 |
| 1 | 3.101046 | -6.902510 | -4.119171 |
| 1 | 1.420023 | -7.356324 | -4.551613 |
| 1 | 2.065741 | -5.812261 | -5.103277 |

E = -1400.801560 Hartrees

G = -1400.469227 Hartrees

|    |           |           |           |
|----|-----------|-----------|-----------|
| 6  | 2.554770  | -3.204772 | 0.556614  |
| 1  | 3.626106  | -3.082703 | 0.644159  |
| 6  | 1.777091  | -2.952276 | -0.601045 |
| 1  | 2.157170  | -2.628057 | -1.562552 |
| 6  | 0.418236  | -3.312078 | -0.321637 |
| 1  | -0.416632 | -3.246125 | -1.005283 |
| 6  | 1.675733  | -3.718598 | 1.575878  |
| 1  | 1.966668  | -4.033834 | 2.569154  |
| 6  | 0.359141  | -3.756665 | 1.035235  |
| 1  | -0.518232 | -4.146532 | 1.535011  |
| 45 | 1.648546  | -5.056483 | -0.079340 |
| 8  | 2.826593  | -6.723519 | 0.624608  |
| 8  | 0.704242  | -6.944460 | 0.226243  |
| 6  | 1.816117  | -7.484676 | 0.537796  |
| 6  | 1.922623  | -8.960046 | 0.738083  |
| 1  | 1.010749  | -9.348259 | 1.197367  |
| 1  | 2.041423  | -9.434560 | -0.242954 |
| 1  | 2.792293  | -9.202953 | 1.351422  |
| 6  | 0.207833  | -5.247832 | -3.078959 |
| 6  | -0.878506 | -5.887933 | -2.486842 |
| 6  | 0.054966  | -3.982797 | -3.674962 |
| 6  | -2.130293 | -5.278738 | -2.504886 |
| 1  | -0.739509 | -6.850112 | -2.004294 |
| 6  | -1.209671 | -3.382307 | -3.685654 |
| 6  | -2.295112 | -4.032676 | -3.108016 |
| 1  | -2.977303 | -5.777891 | -2.045424 |
| 1  | -1.328429 | -2.402734 | -4.136975 |
| 1  | -3.271847 | -3.559921 | -3.120894 |
| 6  | 1.216170  | -3.310828 | -4.174217 |
| 6  | 2.268368  | -2.812822 | -4.529505 |
| 14 | 3.931822  | -2.172377 | -5.037342 |
| 6  | 4.782341  | -1.539210 | -3.487747 |
| 1  | 5.777631  | -1.147381 | -3.731847 |
| 1  | 4.212056  | -0.728857 | -3.018842 |
| 1  | 4.912235  | -2.338661 | -2.748323 |
| 6  | 4.855729  | -3.631197 | -5.772310 |
| 1  | 4.332538  | -4.030947 | -6.648733 |
| 1  | 5.862355  | -3.332482 | -6.090353 |
| 1  | 4.962011  | -4.441913 | -5.041728 |
| 6  | 3.689858  | -0.802192 | -6.294794 |
| 1  | 3.131047  | 0.038894  | -5.868339 |
| 1  | 4.661156  | -0.420681 | -6.633478 |
| 1  | 3.145448  | -1.160310 | -7.176195 |
| 8  | 2.205736  | -5.935551 | -1.991738 |
| 6  | 1.555408  | -5.893892 | -3.038785 |

7s

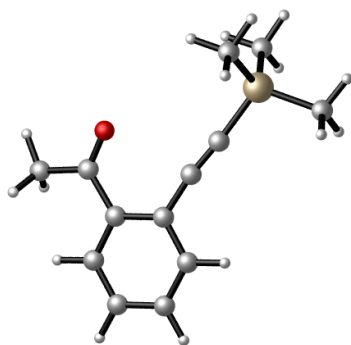

E = -869.524316 Hartrees

G = -869.318095 Hartrees

|    |           |           |           |
|----|-----------|-----------|-----------|
| 6  | 1.134758  | -0.668874 | -0.303289 |
| 6  | 2.516228  | -0.540099 | -0.242183 |
| 6  | 3.121879  | 0.720922  | -0.126766 |
| 6  | 2.307409  | 1.877236  | -0.073811 |
| 6  | 0.918516  | 1.720948  | -0.143761 |
| 6  | 0.330743  | 0.466386  | -0.255288 |
| 1  | 0.688698  | -1.654626 | -0.391975 |
| 1  | 3.148790  | -1.421100 | -0.285282 |
| 1  | 0.277028  | 2.594425  | -0.106723 |
| 1  | -0.749816 | 0.376948  | -0.305146 |
| 6  | 4.555571  | 0.736860  | -0.093220 |
| 6  | 5.765473  | 0.598895  | -0.094328 |
| 14 | 7.609055  | 0.520170  | -0.102441 |
| 6  | 8.228065  | 1.571664  | -1.531751 |
| 1  | 7.890049  | 2.610205  | -1.437180 |
| 1  | 9.325044  | 1.575047  | -1.558919 |
| 1  | 7.869661  | 1.186606  | -2.493778 |
| 6  | 8.237263  | 1.190418  | 1.536417  |
| 1  | 7.861821  | 0.601359  | 2.381290  |
| 1  | 9.333735  | 1.158607  | 1.566526  |
| 1  | 7.927427  | 2.231180  | 1.686659  |
| 6  | 8.134307  | -1.269857 | -0.328210 |
| 1  | 7.745512  | -1.686696 | -1.264919 |
| 1  | 9.228604  | -1.346818 | -0.357560 |
| 1  | 7.777135  | -1.899838 | 0.494981  |
| 6  | 2.901172  | 3.248889  | 0.065959  |
| 6  | 1.979930  | 4.445437  | -0.022183 |
| 1  | 1.419448  | 4.445701  | -0.963390 |
| 1  | 1.253076  | 4.439306  | 0.797881  |
| 1  | 2.581060  | 5.354244  | 0.042333  |
| 8  | 4.094883  | 3.404171  | 0.250574  |

Int9c

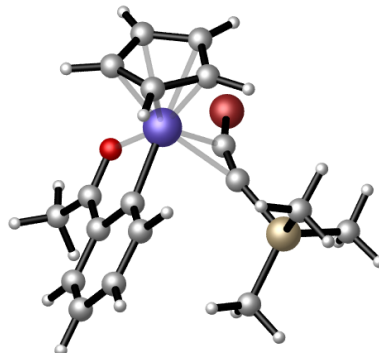

E = -1185.543915 Hartrees

G = -1185.257799 Hartrees

|    |           |           |           |
|----|-----------|-----------|-----------|
| 45 | 0.480120  | 1.252720  | 0.075390  |
| 6  | 0.057079  | 3.156744  | -0.483165 |
| 6  | 0.411663  | 4.340274  | 0.161279  |
| 6  | -0.634219 | 3.244536  | -1.709296 |
| 6  | 0.078016  | 5.571749  | -0.402587 |
| 1  | 0.945381  | 4.323645  | 1.105025  |
| 6  | -0.989516 | 4.484276  | -2.260890 |
| 6  | -0.630698 | 5.650369  | -1.604176 |
| 1  | 0.369467  | 6.484582  | 0.109379  |
| 1  | -1.530362 | 4.529295  | -3.201704 |
| 1  | -0.889313 | 6.616621  | -2.024376 |
| 6  | 1.772276  | 0.992732  | 1.810806  |
| 1  | 1.481982  | 1.293040  | 2.808859  |
| 6  | 2.462305  | 1.799298  | 0.861782  |
| 6  | 1.637382  | -0.338297 | 1.256291  |
| 1  | 2.744056  | 2.834481  | 0.991459  |
| 6  | 2.608123  | 1.032604  | -0.326665 |
| 1  | 1.171132  | -1.179843 | 1.750725  |
| 6  | 2.133070  | -0.310236 | -0.049547 |
| 1  | 3.073109  | 1.362232  | -1.246152 |
| 1  | 2.111192  | -1.125116 | -0.761667 |
| 35 | -2.032359 | -1.256608 | 0.126174  |
| 6  | -1.431056 | 0.380688  | 0.663345  |
| 6  | -1.479819 | 1.479621  | 1.248758  |
| 14 | -2.137943 | 2.761909  | 2.450455  |
| 6  | -3.442759 | 1.811590  | 3.407529  |
| 1  | -3.912603 | 2.460604  | 4.157029  |
| 1  | -4.231106 | 1.438838  | 2.743377  |
| 1  | -3.006636 | 0.953095  | 3.931216  |
| 6  | -2.913531 | 4.168306  | 1.489965  |
| 1  | -3.461349 | 4.823431  | 2.179032  |
| 1  | -2.173637 | 4.775998  | 0.961558  |
| 1  | -3.631381 | 3.786545  | 0.754584  |
| 6  | -0.735744 | 3.278813  | 3.579039  |
| 1  | -0.358555 | 2.415689  | 4.139859  |
| 1  | 0.100300  | 3.731932  | 3.038161  |
| 1  | -1.097056 | 4.013823  | 4.309054  |
| 8  | -0.420894 | 0.945168  | -1.817800 |
| 6  | -0.879122 | 1.972834  | -2.364929 |
| 6  | -1.619693 | 1.840906  | -3.651094 |
| 1  | -1.082738 | 2.374981  | -4.443105 |
| 1  | -1.720503 | 0.788952  | -3.921480 |
| 1  | -2.610421 | 2.298485  | -3.558882 |

TS<sub>9-10c</sub>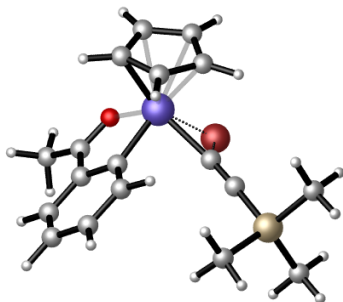

E = -1185.476722 Hartrees

G = -1185.192919 Hartrees

|    |           |           |           |
|----|-----------|-----------|-----------|
| 45 | 0.431354  | 1.024710  | -0.378744 |
| 6  | -0.235169 | 2.862387  | -0.968644 |
| 6  | -0.267028 | 4.023012  | -0.209958 |
| 6  | -0.641349 | 2.905612  | -2.315690 |
| 6  | -0.698721 | 5.213196  | -0.793981 |
| 1  | 0.012601  | 4.009016  | 0.837246  |
| 6  | -1.088101 | 4.104604  | -2.892014 |
| 6  | -1.112416 | 5.259422  | -2.128080 |
| 1  | -0.719948 | 6.117621  | -0.192536 |
| 1  | -1.407097 | 4.122428  | -3.929813 |
| 1  | -1.453826 | 6.193508  | -2.561197 |
| 6  | 1.748709  | 0.671496  | 1.360551  |
| 1  | 1.353498  | 0.609749  | 2.365524  |
| 6  | 2.136653  | 1.872318  | 0.694719  |
| 6  | 2.043882  | -0.450998 | 0.502430  |
| 1  | 2.078728  | 2.872243  | 1.100402  |
| 6  | 2.521338  | 1.510620  | -0.627534 |
| 1  | 1.863146  | -1.490769 | 0.737842  |
| 6  | 2.494973  | 0.058822  | -0.715246 |
| 1  | 2.856932  | 2.185446  | -1.403908 |
| 1  | 2.724050  | -0.513977 | -1.604925 |
| 35 | -1.559415 | -0.535185 | 0.056173  |
| 6  | -1.029488 | 1.355861  | 1.072950  |
| 6  | -1.506380 | 1.967372  | 2.021884  |
| 14 | -2.171469 | 2.980826  | 3.411230  |
| 6  | -3.991623 | 2.576815  | 3.639913  |
| 1  | -4.409946 | 3.152909  | 4.474749  |
| 1  | -4.569020 | 2.821936  | 2.740657  |
| 1  | -4.141399 | 1.512745  | 3.856725  |
| 6  | -1.955972 | 4.796002  | 2.970358  |
| 1  | -2.394605 | 5.429564  | 3.751690  |
| 1  | -0.898102 | 5.068414  | 2.876667  |
| 1  | -2.456640 | 5.037812  | 2.025646  |
| 6  | -1.187141 | 2.544176  | 4.952150  |
| 1  | -1.298171 | 1.483147  | 5.205099  |
| 1  | -0.118699 | 2.749476  | 4.815131  |
| 1  | -1.534363 | 3.131120  | 5.811444  |
| 8  | -0.095330 | 0.668025  | -2.392461 |
| 6  | -0.549982 | 1.648724  | -3.026466 |
| 6  | -0.960245 | 1.466569  | -4.444156 |
| 1  | -0.380704 | 2.140189  | -5.085014 |
| 1  | -0.801787 | 0.433115  | -4.754638 |
| 1  | -2.017290 | 1.730727  | -4.557459 |

Int10c

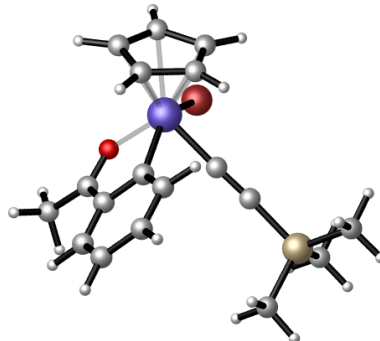

E = -1185.495930 Hartrees

G = -1185.210840 Hartrees

|    |           |           |           |
|----|-----------|-----------|-----------|
| 45 | 0.560540  | 0.858729  | -0.207639 |
| 6  | 0.266063  | 2.867307  | -0.732515 |
| 6  | 0.776707  | 3.994820  | -0.109505 |
| 6  | -0.530464 | 2.993045  | -1.881811 |
| 6  | 0.503207  | 5.248366  | -0.653411 |
| 1  | 1.365387  | 3.926407  | 0.796913  |
| 6  | -0.806867 | 4.262997  | -2.410135 |
| 6  | -0.285144 | 5.388956  | -1.797882 |
| 1  | 0.910345  | 6.129288  | -0.166702 |
| 1  | -1.427936 | 4.353179  | -3.295798 |
| 1  | -0.489638 | 6.374468  | -2.201628 |
| 6  | 2.136590  | -0.035720 | 1.021409  |
| 1  | 1.910067  | -0.515857 | 1.963772  |
| 6  | 2.416870  | 1.336686  | 0.832020  |
| 6  | 2.244352  | -0.694692 | -0.272264 |
| 1  | 2.435434  | 2.091343  | 1.606312  |
| 6  | 2.661135  | 1.536939  | -0.576188 |
| 1  | 2.082032  | -1.747445 | -0.456101 |
| 6  | 2.578640  | 0.271681  | -1.233193 |
| 1  | 2.921340  | 2.473499  | -1.049480 |
| 1  | 2.686324  | 0.104597  | -2.296588 |
| 35 | -0.776261 | -1.228237 | 0.452782  |
| 6  | -0.681083 | 1.698377  | 1.083296  |
| 6  | -1.406493 | 2.216329  | 1.917341  |
| 14 | -2.503576 | 3.092857  | 3.110445  |
| 6  | -3.933087 | 1.966956  | 3.575990  |
| 1  | -4.605822 | 2.470656  | 4.281390  |
| 1  | -4.521011 | 1.683266  | 2.695068  |
| 1  | -3.574883 | 1.046807  | 4.052487  |
| 6  | -3.125191 | 4.649275  | 2.258114  |
| 1  | -3.762798 | 5.236724  | 2.930595  |
| 1  | -2.290147 | 5.287673  | 1.944856  |
| 1  | -3.713325 | 4.405525  | 1.365242  |
| 6  | -1.491375 | 3.535399  | 4.631904  |
| 1  | -1.090619 | 2.638997  | 5.119663  |
| 1  | -0.647832 | 4.188052  | 4.376879  |
| 1  | -2.113365 | 4.064517  | 5.364686  |
| 8  | -0.684596 | 0.695123  | -1.875153 |
| 6  | -1.029352 | 1.757343  | -2.441413 |
| 6  | -1.915261 | 1.685288  | -3.632370 |
| 1  | -1.435450 | 2.180606  | -4.483168 |
| 1  | -2.132621 | 0.645400  | -3.878714 |
| 1  | -2.848799 | 2.219277  | -3.421589 |

TS<sub>4-12c</sub>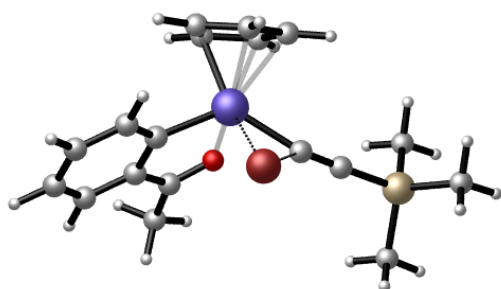

E = -1185.474784 Hartrees

G = -1185.190562 Hartrees

|    |           |           |           |
|----|-----------|-----------|-----------|
| 45 | 0.591534  | 0.883616  | -1.130060 |
| 6  | 0.837000  | 2.830215  | -0.574544 |
| 6  | 2.025361  | 3.416082  | -0.165047 |
| 6  | -0.344421 | 3.590004  | -0.617764 |
| 6  | 2.030038  | 4.767606  | 0.183952  |
| 1  | 2.944537  | 2.841892  | -0.106355 |
| 6  | -0.330148 | 4.944992  | -0.258786 |
| 6  | 0.862210  | 5.531875  | 0.136045  |
| 1  | 2.961323  | 5.228220  | 0.500109  |
| 1  | -1.248188 | 5.524337  | -0.282780 |
| 1  | 0.887538  | 6.580377  | 0.413136  |
| 6  | -0.412309 | -0.536190 | -0.013322 |
| 6  | -1.264587 | -1.408798 | 0.091671  |
| 14 | -2.580438 | -2.700107 | 0.127666  |
| 6  | -3.024719 | -3.129666 | -1.647413 |
| 1  | -3.804639 | -3.901024 | -1.671982 |
| 1  | -2.155602 | -3.515024 | -2.193705 |
| 1  | -3.402643 | -2.252291 | -2.185422 |
| 6  | -4.067319 | -1.989322 | 1.027848  |
| 1  | -4.439233 | -1.086089 | 0.530373  |
| 1  | -3.822009 | -1.729661 | 2.064248  |
| 1  | -4.883714 | -2.721834 | 1.049450  |
| 6  | -1.906255 | -4.210162 | 1.018054  |
| 1  | -1.007739 | -4.598171 | 0.524300  |
| 1  | -2.655937 | -5.011097 | 1.026863  |
| 1  | -1.648895 | -3.980115 | 2.058510  |
| 35 | 1.031865  | 0.444283  | 1.367610  |
| 6  | 2.474729  | -0.068440 | -1.840004 |
| 1  | 3.282781  | -0.337987 | -1.172296 |
| 6  | 2.321601  | 1.181475  | -2.500869 |
| 6  | 1.420257  | -0.953473 | -2.285079 |
| 1  | 2.973561  | 2.038261  | -2.408137 |
| 6  | 1.094381  | 1.129012  | -3.220942 |
| 1  | 1.276742  | -1.972483 | -1.954103 |
| 6  | 0.571407  | -0.223291 | -3.120952 |
| 1  | 0.666163  | 1.929552  | -3.810306 |
| 1  | -0.357885 | -0.569266 | -3.553545 |
| 8  | -1.388740 | 1.643241  | -1.285675 |
| 6  | -1.529889 | 2.858033  | -1.022551 |
| 6  | -2.879090 | 3.473555  | -1.139129 |
| 1  | -3.166332 | 3.917653  | -0.179962 |
| 1  | -2.850690 | 4.280236  | -1.880323 |
| 1  | -3.613403 | 2.723949  | -1.435755 |

Int12c

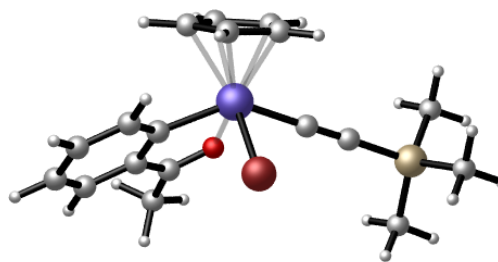

E = -1185.490031 Hartrees

G = -1185.206039 Hartrees

|    |           |           |           |
|----|-----------|-----------|-----------|
| 45 | 0.479854  | 0.873420  | -1.077914 |
| 6  | 0.935406  | 2.855615  | -0.531993 |
| 6  | 2.170050  | 3.375312  | -0.175976 |
| 6  | -0.200190 | 3.679909  | -0.539192 |
| 6  | 2.265158  | 4.725371  | 0.158454  |
| 1  | 3.062598  | 2.761268  | -0.146351 |
| 6  | -0.091618 | 5.035952  | -0.191365 |
| 6  | 1.143303  | 5.557447  | 0.151524  |
| 1  | 3.235125  | 5.130473  | 0.430614  |
| 1  | -0.976446 | 5.665007  | -0.187460 |
| 1  | 1.239893  | 6.604163  | 0.418570  |
| 6  | -0.736099 | -0.653448 | -0.612600 |
| 6  | -1.529270 | -1.557628 | -0.409200 |
| 14 | -2.748766 | -2.899862 | -0.065961 |
| 6  | -3.228446 | -3.684069 | -1.705471 |
| 1  | -3.979462 | -4.469727 | -1.554635 |
| 1  | -2.362438 | -4.142043 | -2.198356 |
| 1  | -3.653949 | -2.942834 | -2.392722 |
| 6  | -4.250566 | -2.131972 | 0.761656  |
| 1  | -4.715108 | -1.376096 | 0.117505  |
| 1  | -3.980505 | -1.649213 | 1.708120  |
| 1  | -5.004993 | -2.898610 | 0.978228  |
| 6  | -1.938697 | -4.164156 | 1.062804  |
| 1  | -1.048287 | -4.605115 | 0.599540  |
| 1  | -2.636792 | -4.979669 | 1.289830  |
| 1  | -1.634223 | -3.708522 | 2.012308  |
| 35 | 0.920604  | 0.649622  | 1.406780  |
| 6  | 2.521420  | 0.506604  | -1.782759 |
| 1  | 3.381838  | 0.642876  | -1.141782 |
| 6  | 1.957387  | 1.484485  | -2.668993 |
| 6  | 1.759046  | -0.691311 | -1.903826 |
| 1  | 2.326463  | 2.485985  | -2.836518 |
| 6  | 0.837037  | 0.890251  | -3.319751 |
| 1  | 1.931496  | -1.614333 | -1.367181 |
| 6  | 0.715002  | -0.450952 | -2.866197 |
| 1  | 0.170247  | 1.386581  | -4.012937 |
| 1  | -0.039517 | -1.159296 | -3.176838 |
| 8  | -1.406037 | 1.808147  | -1.138395 |
| 6  | -1.447260 | 3.032364  | -0.879013 |
| 6  | -2.757620 | 3.732402  | -0.934982 |
| 1  | -2.976976 | 4.178006  | 0.041315  |
| 1  | -2.709687 | 4.545823  | -1.667483 |
| 1  | -3.547573 | 3.032148  | -1.207968 |



Int13c

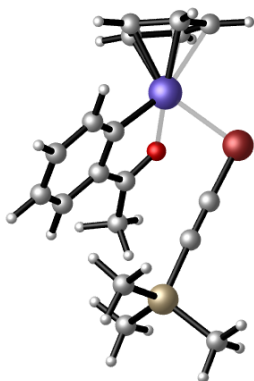

E = -1185.521235 Hartrees

G = -1185.238039 Hartrees

|    |           |           |           |
|----|-----------|-----------|-----------|
| 6  | 0.155308  | -3.526460 | 2.724341  |
| 1  | 0.837548  | -2.728833 | 2.988538  |
| 6  | -0.986097 | -3.403796 | 1.822390  |
| 1  | -1.246361 | -2.516269 | 1.260189  |
| 6  | -1.622779 | -4.635220 | 1.758465  |
| 1  | -2.459728 | -4.896945 | 1.124885  |
| 6  | 0.134923  | -4.824251 | 3.289104  |
| 1  | 0.828505  | -5.218877 | 4.018750  |
| 6  | -0.886034 | -5.563128 | 2.606704  |
| 1  | -1.145702 | -6.598899 | 2.782715  |
| 45 | 0.558969  | -4.988714 | 1.176432  |
| 6  | 2.202671  | -6.113423 | 1.453816  |
| 6  | 2.285921  | -7.226757 | 0.592546  |
| 6  | 3.224967  | -5.901143 | 2.374504  |
| 6  | 3.358982  | -8.123899 | 0.665994  |
| 6  | 4.298570  | -6.791641 | 2.438090  |
| 1  | 3.200262  | -5.046637 | 3.044159  |
| 6  | 4.364434  | -7.905760 | 1.597234  |
| 1  | 3.403904  | -8.981592 | 0.001044  |
| 1  | 5.090799  | -6.619301 | 3.161239  |
| 1  | 5.198874  | -8.595781 | 1.669329  |
| 6  | 3.254456  | -4.444995 | -1.209824 |
| 6  | 4.201404  | -5.104385 | -1.587520 |
| 14 | 5.708000  | -6.032817 | -2.174677 |
| 35 | 1.846288  | -3.450584 | -0.666145 |
| 6  | 6.935635  | -6.031722 | -0.759561 |
| 1  | 6.519682  | -6.523286 | 0.127201  |
| 1  | 7.849666  | -6.566142 | -1.046317 |
| 1  | 7.216461  | -5.009442 | -0.480985 |
| 6  | 5.180467  | -7.769118 | -2.643683 |
| 1  | 4.806589  | -8.328075 | -1.779668 |
| 1  | 4.402630  | -7.756301 | -3.415614 |
| 1  | 6.039774  | -8.318093 | -3.048642 |
| 6  | 6.359567  | -5.103456 | -3.667016 |
| 1  | 5.621679  | -5.088039 | -4.477215 |
| 1  | 6.612105  | -4.066528 | -3.417656 |
| 1  | 7.266356  | -5.589622 | -4.047204 |
| 8  | 0.332362  | -6.430111 | -0.364401 |
| 6  | 1.224429  | -7.307269 | -0.400587 |
| 6  | 1.181818  | -8.343793 | -1.468740 |
| 1  | 2.032001  | -8.196002 | -2.145229 |
| 1  | 1.277943  | -9.343823 | -1.033986 |
| 1  | 0.250815  | -8.267518 | -2.032002 |

TS<sub>13-14c</sub>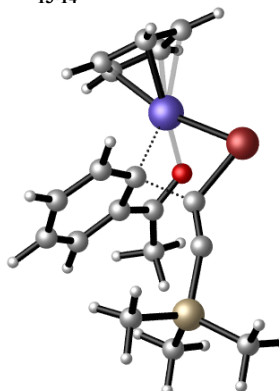

E = -1185.455058 Hartrees

G = -1185.171285 Hartrees

|    |           |           |           |
|----|-----------|-----------|-----------|
| 6  | 0.291095  | -3.641540 | 2.666455  |
| 1  | 0.926233  | -2.806813 | 2.931598  |
| 6  | -0.925042 | -3.566282 | 1.881267  |
| 1  | -1.307841 | -2.676928 | 1.397733  |
| 6  | -1.456579 | -4.856332 | 1.774399  |
| 1  | -2.322755 | -5.145768 | 1.194208  |
| 6  | 0.437914  | -4.984862 | 3.117467  |
| 1  | 1.241755  | -5.366907 | 3.732323  |
| 6  | -0.584225 | -5.760722 | 2.497759  |
| 1  | -0.728344 | -6.827621 | 2.605899  |
| 45 | 0.622733  | -4.890728 | 0.951832  |
| 6  | 2.554960  | -5.728772 | 0.795910  |
| 6  | 2.337294  | -7.090438 | 0.382411  |
| 6  | 3.499872  | -5.502305 | 1.836647  |
| 6  | 3.190863  | -8.101998 | 0.791455  |
| 6  | 4.310422  | -6.530798 | 2.279321  |
| 1  | 3.630267  | -4.495732 | 2.223318  |
| 6  | 4.192845  | -7.812053 | 1.722802  |
| 1  | 3.072441  | -9.116661 | 0.423900  |
| 1  | 5.057163  | -6.345778 | 3.044943  |
| 1  | 4.861754  | -8.601683 | 2.049566  |
| 6  | 3.114344  | -4.804071 | -0.626501 |
| 6  | 4.096874  | -5.074756 | -1.347682 |
| 14 | 5.561238  | -5.971985 | -2.002341 |
| 35 | 1.749332  | -3.367783 | -0.769271 |
| 6  | 6.838322  | -6.160990 | -0.632500 |
| 1  | 6.496914  | -6.866914 | 0.132789  |
| 1  | 7.782413  | -6.539013 | -1.045393 |
| 1  | 7.048620  | -5.204133 | -0.140387 |
| 6  | 4.978802  | -7.657232 | -2.607227 |
| 1  | 4.588393  | -8.261901 | -1.780666 |
| 1  | 4.196071  | -7.564611 | -3.369307 |
| 1  | 5.815606  | -8.206489 | -3.057242 |
| 6  | 6.307858  | -5.005844 | -3.431980 |
| 1  | 5.582131  | -4.862701 | -4.241260 |
| 1  | 6.652848  | -4.015952 | -3.110063 |
| 1  | 7.171093  | -5.542452 | -3.845574 |
| 8  | 0.384377  | -6.349441 | -0.623082 |
| 6  | 1.231858  | -7.264894 | -0.557762 |
| 6  | 1.119529  | -8.453337 | -1.446661 |
| 1  | 2.006282  | -8.507744 | -2.089435 |
| 1  | 1.092456  | -9.370610 | -0.847404 |
| 1  | 0.218679  | -8.386873 | -2.058067 |

Int14c

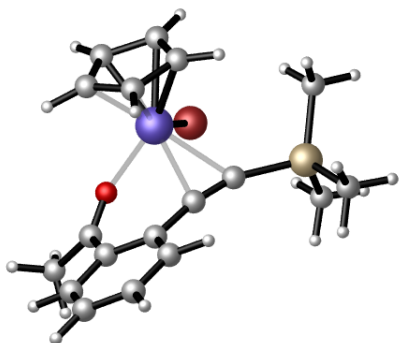

E = -1185.599940 Hartrees

G = -1185.312744 Hartrees

|    |           |           |           |
|----|-----------|-----------|-----------|
| 6  | 2.042946  | -3.333556 | 0.361853  |
| 1  | 3.004956  | -2.859585 | 0.222983  |
| 6  | 0.936472  | -3.254975 | -0.531450 |
| 1  | 0.924024  | -2.732762 | -1.478015 |
| 6  | -0.117322 | -4.068192 | -0.002917 |
| 1  | -1.084847 | -4.234320 | -0.456226 |
| 6  | 1.653410  | -4.139758 | 1.487995  |
| 1  | 2.276672  | -4.396071 | 2.334172  |
| 6  | 0.328006  | -4.582099 | 1.261127  |
| 1  | -0.227714 | -5.261391 | 1.894973  |
| 45 | 1.601009  | -5.298676 | -0.382608 |
| 6  | 3.265565  | -7.359062 | 1.383121  |
| 6  | 2.176425  | -8.252637 | 1.469463  |
| 6  | 4.216101  | -7.316107 | 2.406489  |
| 6  | 2.081699  | -9.098968 | 2.577192  |
| 6  | 4.089197  | -8.149396 | 3.513437  |
| 1  | 5.054239  | -6.632142 | 2.322994  |
| 6  | 3.023086  | -9.039358 | 3.599775  |
| 1  | 1.260623  | -9.803092 | 2.654001  |
| 1  | 4.831653  | -8.106730 | 4.303698  |
| 1  | 2.925613  | -9.694565 | 4.458849  |
| 6  | 3.469595  | -6.507501 | 0.244477  |
| 6  | 3.892266  | -5.825516 | -0.695033 |
| 14 | 5.061404  | -5.064915 | -1.955973 |
| 35 | 1.371211  | -5.584100 | -2.894515 |
| 6  | 6.705994  | -5.032682 | -1.049836 |
| 1  | 7.026179  | -6.044156 | -0.773433 |
| 1  | 7.482932  | -4.599724 | -1.692287 |
| 1  | 6.653131  | -4.431107 | -0.134888 |
| 6  | 5.134060  | -6.199509 | -3.441382 |
| 1  | 5.425378  | -7.215106 | -3.149190 |
| 1  | 4.164758  | -6.253559 | -3.946451 |
| 1  | 5.877342  | -5.828501 | -4.158336 |
| 6  | 4.493185  | -3.334006 | -2.383405 |
| 1  | 3.472515  | -3.337191 | -2.779599 |
| 1  | 4.534809  | -2.665332 | -1.516089 |
| 1  | 5.153466  | -2.914722 | -3.153152 |
| 8  | 0.877280  | -7.352066 | -0.323955 |
| 6  | 1.139852  | -8.311134 | 0.411201  |
| 6  | 0.346455  | -9.567202 | 0.223554  |
| 1  | 0.987886  | -10.45164 | 0.260165  |
| 1  | -0.390430 | -9.650039 | 1.032197  |
| 1  | -0.185416 | -9.519292 | -0.727579 |

## 8) References

- 
- <sup>1</sup> Graux, L. V.; Clavier, H.; Buono, G. *ChemCatChem* **2014**, *6*, 2544 – 2548.
- <sup>2</sup> Yao, T.; Larock, R.C. *J. Org. Chem.* **2003**, *68*, 5936-5942.
- <sup>3</sup> Hansch, C.; Leo, A.; Taft, R. W. *Chem. Rev.* **1991**, *91*, 165-195.
- <sup>4</sup> Gaussian 09, Revision B.1, Frisch, M. J.; Trucks, G. W.; Schlegel, H. B.; Scuseria, G. E.; Robb, M. A.; Cheeseman, J. R.; Scalmani, G.; Barone, V.; Mennucci, B.; Petersson, G. A.; Nakatsuji, H.; Caricato, M.; Li, X.; Hratchian, H. P.; Izmaylov, A. F.; Bloino, J.; Zheng, G.; Sonnenberg, J. L.; Hada, M.; Ehara, M.; Toyota, K.; Fukuda, R.; Hasegawa, J.; Ishida, M.; Nakajima, T.; Honda, Y.; Kitao, O.; Nakai, H.; Vreven, T.; Montgomery, J. A.; Peralta, Jr. J. E.; Ogliaro, F.; Bearpark, M.; Heyd, J. J.; Brothers, E.; Kudin, K. N.; Staroverov, V. N.; Kobayashi, R.; Normand, J.; Raghavachari, K.; Rendell, A.; Burant, J. C.; Iyengar, S. S.; Tomasi, J.; Cossi, M.; Rega, N.; Millam, J. M.; Klene, M.; Knox, J. E.; Cross, J. B.; Bakken, V.; Adamo, C.; Jaramillo, J.; Gomperts, R.; Stratmann, R. E.; Yazyev, O.; Austin, A. J.; Cammi, R.; Pomelli, C.; Ochterski, J. W.; Martin, R.L.; Morokuma, K.; Zakrzewski, V. G.; Voth, G. A.; Salvador, P.; Dannenberg, J. J.; Dapprich, S.; Daniels, A. D.; Farkas, Ö.; Foresman, J. B.; Ortiz, J. V.; Cioslowski, J.; Fox, D. J. Gaussian, Inc., Wallingford CT **2009**.
- <sup>5</sup> Chai, J.-D.; Head-Gordon, M. *Phys. Chem. Chem. Phys.* **2008**, *10*, 6615–6620.
- <sup>6</sup> Wadt, W. R.; Hay, P. J. *J. Chem. Phys.* **1985**, *82*, 284–298.
- <sup>7</sup> a) Ehlers, A.; Böhme, M.; Dapprich, S.; Gobbi, A.; Höllwarth, A.; Jonas, V.; Köhler, K.; Stegmann, R.; Veldkamp, A.; Frenking, G. *Chem. Phys. Lett.* **1993**, *208*, 111–114. b) Höllwarth, A.; Böhme, M.; Dapprich, S.; Ehlers, A. W.; Gobbi, A.; Jonas, V.; Köhler, K. F.; Stegmann, R.; Veldkamp, A.; Frenking, G. *Chem. Phys. Lett.* **1993**, *208*, 237–240.
- <sup>8</sup> Hehre, W. J.; Ditchfield, R.; Pople, J. A. *J. Chem. Phys.* **1972**, *56*, 2257–2261.
- <sup>9</sup> Marenich, A. V.; Cramer, C. J.; Truhlar, D. G. *J. Phys. Chem. B.* **2009**, *113*, 6378–6396.
- <sup>10</sup> Mulliken, R. S. *J. Chem. Phys.* **1955**, *23*, 1833–1840.
